# Supplementary material for: A Mendelian Randomization Study of Metabolite Profiles, Fasting Glucose, and Type 2 Diabetes
Source: Oxford University Press journal article supplement (doi:10.2337/db17-0199), 2017-08-28
Supplement: db170199supplementarydata2.xlsx [file db170199supplementarydata2.xlsx]

## Sheet: Suppl_t_1
Supplemental table 1. SNPs that are excluded from the genetic risk score because of their major association to outcome phenotypes or possible confounders BMI and WHR
MR set	SNP	Chromosome	Position	Major association
Forward and backward MR	rs977747	1	47684677	BMI
Forward and backward MR	rs657452	1	49589847	BMI
Forward and backward MR	rs11583200	1	50559820	BMI
Forward and backward MR	rs3101336	1	72751185	BMI
Forward and backward MR	rs12566985	1	75002193	BMI
Forward and backward MR	rs12401738	1	78446761	BMI
Forward and backward MR	rs11165643	1	96924097	BMI
Forward and backward MR	rs17024393	1	110154688	BMI
Forward and backward MR	rs543874	1	177889480	BMI
Forward and backward MR	rs2820292	1	201784287	BMI
Forward and backward MR	rs13021737	2	632348	BMI
Forward and backward MR	rs10182181	2	25150296	BMI
Forward and backward MR	rs11126666	2	26928811	BMI
Forward and backward MR	rs1016287	2	59305625	BMI
Forward and backward MR	rs11688816	2	63053048	BMI
Forward and backward MR	rs2121279	2	143043285	BMI
Forward and backward MR	rs1460676	2	164567689	BMI
Forward and backward MR	rs1528435	2	181550962	BMI
Forward and backward MR	rs17203016	2	208255518	BMI
Forward and backward MR	rs7599312	2	213413231	BMI
Forward and backward MR	rs492400	2	219349752	BMI
Forward and backward MR	rs2176040	2	227092802	BMI
Forward and backward MR	rs6804842	3	25106437	BMI
Forward and backward MR	rs2365389	3	61236462	BMI
Forward and backward MR	rs3849570	3	81792112	BMI
Forward and backward MR	rs13078960	3	85807590	BMI
Forward and backward MR	rs16851483	3	141275436	BMI
Forward and backward MR	rs1516725	3	185824004	BMI
Forward and backward MR	rs10938397	4	45182527	BMI
Forward and backward MR	rs17001654	4	77129568	BMI
Forward and backward MR	rs13107325	4	103188709	BMI
Forward and backward MR	rs11727676	4	145659064	BMI
Forward and backward MR	rs2112347	5	75015242	BMI
Forward and backward MR	rs7715256	5	153537893	BMI
Forward and backward MR	rs205262	6	34563164	BMI
Forward and backward MR	rs2033529	6	40348653	BMI
Forward and backward MR	rs2207139	6	50845490	BMI
Forward and backward MR	rs9400239	6	108977663	BMI
Forward and backward MR	rs9374842	6	120185665	BMI
Forward and backward MR	rs13201877	6	137675541	BMI
Forward and backward MR	rs13191362	6	163033350	BMI
Forward and backward MR	rs1167827	7	75163169	BMI
Forward and backward MR	rs2245368	7	76608143	BMI
Forward and backward MR	rs9641123	7	93197732	BMI
Forward and backward MR	rs6465468	7	95169514	BMI
Forward and backward MR	rs17405819	8	76806584	BMI
Forward and backward MR	rs16907751	8	81375457	BMI
Forward and backward MR	rs2033732	8	85079709	BMI
Forward and backward MR	rs4740619	9	15634326	BMI
Forward and backward MR	rs10968576	9	28414339	BMI
Forward and backward MR	rs6477694	9	111932342	BMI
Forward and backward MR	rs1928295	9	120378483	BMI
Forward and backward MR	rs10733682	9	129460914	BMI
Forward and backward MR	rs7899106	10	87410904	BMI
Forward and backward MR	rs17094222	10	102395440	BMI
Forward and backward MR	rs11191560	10	104869038	BMI
Forward and backward MR	rs7903146	10	114758349	BMI
Forward and backward MR	rs4256980	11	8673939	BMI
Forward and backward MR	rs11030104	11	27684517	BMI
Forward and backward MR	rs2176598	11	43864278	BMI
Forward and backward MR	rs3817334	11	47650993	BMI
Forward and backward MR	rs12286929	11	115022404	BMI
Forward and backward MR	rs7138803	12	50247468	BMI
Forward and backward MR	rs11057405	12	122781897	BMI
Forward and backward MR	rs12429545	13	54102206	BMI
Forward and backward MR	rs9540493	13	66205704	BMI
Forward and backward MR	rs1441264	13	79580919	BMI
Forward and backward MR	rs10132280	14	25928179	BMI
Forward and backward MR	rs12885454	14	29736838	BMI
Forward and backward MR	rs11847697	14	30515112	BMI
Forward and backward MR	rs7141420	14	79899454	BMI
Forward and backward MR	rs3736485	15	51748610	BMI
Forward and backward MR	rs16951275	15	68077168	BMI
Forward and backward MR	rs7164727	15	73093991	BMI
Forward and backward MR	rs758747	16	3627358	BMI
Forward and backward MR	rs12446632	16	19935389	BMI
Forward and backward MR	rs2650492	16	28333411	BMI
Forward and backward MR	rs3888190	16	28889486	BMI
Forward and backward MR	rs4787491	16	30015337	BMI
Forward and backward MR	rs9925964	16	31129895	BMI
Forward and backward MR	rs2080454	16	49062590	BMI
Forward and backward MR	rs1558902	16	53803574	BMI
Forward and backward MR	rs9914578	17	2005136	BMI
Forward and backward MR	rs1000940	17	5283252	BMI
Forward and backward MR	rs12940622	17	78615571	BMI
Forward and backward MR	rs1808579	18	21104888	BMI
Forward and backward MR	rs7239883	18	40147671	BMI
Forward and backward MR	rs7243357	18	56883319	BMI
Forward and backward MR	rs6567160	18	57829135	BMI
Forward and backward MR	rs17724992	19	18454825	BMI
Forward and backward MR	rs29941	19	34309532	BMI
Forward and backward MR	rs2075650	19	45395619	BMI
Forward and backward MR	rs2287019	19	46202172	BMI
Forward and backward MR	rs3810291	19	47569003	BMI
Forward and backward MR	rs6091540	20	51087862	BMI
Forward and backward MR	rs2836754	21	40291740	BMI
Forward and backward MR	rs2645294	1	119574587	WHR
Forward and backward MR	rs905938	1	154991389	WHR
Forward and backward MR	rs10919388	1	170372503	WHR
Forward and backward MR	rs714515	1	172352990	WHR
Forward and backward MR	rs2820443	1	219753509	WHR
Forward and backward MR	rs1385167	2	66200648	WHR
Forward and backward MR	rs10195252	2	165513091	WHR
Forward and backward MR	rs1569135	2	188115398	WHR
Forward and backward MR	rs17819328	3	12489342	WHR
Forward and backward MR	rs2276824	3	52637486	WHR
Forward and backward MR	rs2371767	3	64718258	WHR
Forward and backward MR	rs10804591	3	129334233	WHR
Forward and backward MR	rs17451107	3	156797609	WHR
Forward and backward MR	rs3805389	4	56482750	WHR
Forward and backward MR	rs9991328	4	89713121	WHR
Forward and backward MR	rs303084	4	124066948	WHR
Forward and backward MR	rs9687846	5	55861894	WHR
Forward and backward MR	rs1045241	5	118729286	WHR
Forward and backward MR	rs7705502	5	173320815	WHR
Forward and backward MR	rs6556301	5	176527577	WHR
Forward and backward MR	rs1294410	6	6738752	WHR
Forward and backward MR	rs1776897	6	34195011	WHR
Forward and backward MR	rs1358980	6	43764551	WHR
Forward and backward MR	rs1936805	6	127452116	WHR
Forward and backward MR	rs10245353	7	25858614	WHR
Forward and backward MR	rs1534696	7	26397239	WHR
Forward and backward MR	rs7801581	7	27223771	WHR
Forward and backward MR	rs7830933	8	23603324	WHR
Forward and backward MR	rs12679556	8	72514228	WHR
Forward and backward MR	rs10991437	9	107735920	WHR
Forward and backward MR	rs7917772	10	104487443	WHR
Forward and backward MR	rs11231693	11	63862612	WHR
Forward and backward MR	rs10842707	12	26471364	WHR
Forward and backward MR	rs1443512	12	54342684	WHR
Forward and backward MR	rs4765219	12	124440110	WHR
Forward and backward MR	rs8042543	15	31708263	WHR
Forward and backward MR	rs8030605	15	56504598	WHR
Forward and backward MR	rs1440372	15	67033151	WHR
Forward and backward MR	rs2925979	16	81534790	WHR
Forward and backward MR	rs4646404	17	17420199	WHR
Forward and backward MR	rs8066985	17	68453345	WHR
Forward and backward MR	rs12454712	18	60845884	WHR
Forward and backward MR	rs12608504	19	18389135	WHR
Forward and backward MR	rs4081724	19	33824946	WHR
Forward and backward MR	rs979012	20	6623374	WHR
Forward and backward MR	rs224333	20	34023962	WHR
Forward and backward MR	rs6090583	20	45558831	WHR
Forward and backward MR	rs2294239	22	29449477	WHR
Forward MR	rs56305036	1	8283288	Fasting glucose or T2DM
Forward MR	rs2296172	1	39835817	Fasting glucose or T2DM
Forward MR	rs17106184	1	50909985	Fasting glucose or T2DM
Forward MR	rs17407594	1	66170362	Fasting glucose or T2DM
Forward MR	rs9727115	1	99177253	Fasting glucose or T2DM
Forward MR	rs12402441	1	101672863	Fasting glucose or T2DM
Forward MR	rs10923931	1	120517959	Fasting glucose or T2DM
Forward MR	rs6684514	1	156255456	Fasting glucose or T2DM
Forward MR	rs12041363	1	158475894	Fasting glucose or T2DM
Forward MR	rs2779116	1	158585415	Fasting glucose or T2DM
Forward MR	rs17359359	1	163372030	Fasting glucose or T2DM
Forward MR	rs2075988	1	171173411	Fasting glucose or T2DM
Forward MR	rs340874	1	214159256	Fasting glucose or T2DM
Forward MR	rs2785980	1	219700519	Fasting glucose or T2DM
Forward MR	rs1371614	2	27152874	Fasting glucose or T2DM
Forward MR	rs780094	2	27741237	Fasting glucose or T2DM
Forward MR	rs10200833	2	43673316	Fasting glucose or T2DM
Forward MR	rs7578597	2	43732823	Fasting glucose or T2DM
Forward MR	rs895636	2	45188353	Fasting glucose or T2DM
Forward MR	rs243088	2	60568745	Fasting glucose or T2DM
Forward MR	rs243021	2	60584819	Fasting glucose or T2DM
Forward MR	rs998451	2	135429288	Fasting glucose or T2DM
Forward MR	rs6723108	2	135479980	Fasting glucose or T2DM
Forward MR	rs7560163	2	151637936	Fasting glucose or T2DM
Forward MR	rs7593730	2	161171454	Fasting glucose or T2DM
Forward MR	rs3923113	2	165501849	Fasting glucose or T2DM
Forward MR	rs13389219	2	165528876	Fasting glucose or T2DM
Forward MR	rs7607980	2	165551201	Fasting glucose or T2DM
Forward MR	rs13387347	2	169754846	Fasting glucose or T2DM
Forward MR	rs560887	2	169763148	Fasting glucose or T2DM
Forward MR	rs563694	2	169774071	Fasting glucose or T2DM
Forward MR	rs552976	2	169791438	Fasting glucose or T2DM
Forward MR	rs3755157	2	169792171	Fasting glucose or T2DM
Forward MR	rs733331	2	173546313	Fasting glucose or T2DM
Forward MR	rs7578326	2	227020653	Fasting glucose or T2DM
Forward MR	rs2943634	2	227068080	Fasting glucose or T2DM
Forward MR	rs2943641	2	227093745	Fasting glucose or T2DM
Forward MR	rs4675095	2	227651967	Fasting glucose or T2DM
Forward MR	rs2975760	2	241531163	Fasting glucose or T2DM
Forward MR	rs3792267	2	241531174	Fasting glucose or T2DM
Forward MR	rs13081389	3	12289800	Fasting glucose or T2DM
Forward MR	rs17036160	3	12329783	Fasting glucose or T2DM
Forward MR	rs1801282	3	12393125	Fasting glucose or T2DM
Forward MR	rs1797912	3	12470239	Fasting glucose or T2DM
Forward MR	rs6780569	3	23198484	Fasting glucose or T2DM
Forward MR	rs11715915	3	49455330	Fasting glucose or T2DM
Forward MR	rs831571	3	64048297	Fasting glucose or T2DM
Forward MR	rs6795735	3	64705365	Fasting glucose or T2DM
Forward MR	rs4607103	3	64711904	Fasting glucose or T2DM
Forward MR	rs11708067	3	123065778	Fasting glucose or T2DM
Forward MR	rs2877716	3	123094451	Fasting glucose or T2DM
Forward MR	rs11920090	3	170717521	Fasting glucose or T2DM
Forward MR	rs4402960	3	185511687	Fasting glucose or T2DM
Forward MR	rs7651090	3	185513392	Fasting glucose or T2DM
Forward MR	rs1470579	3	185529080	Fasting glucose or T2DM
Forward MR	rs7647305	3	185834290	Fasting glucose or T2DM
Forward MR	rs16861329	3	186666461	Fasting glucose or T2DM
Forward MR	rs6808574	3	187740523	Fasting glucose or T2DM
Forward MR	rs7656416	4	1254535	Fasting glucose or T2DM
Forward MR	rs6815464	4	1309901	Fasting glucose or T2DM
Forward MR	rs4689388	4	6270056	Fasting glucose or T2DM
Forward MR	rs10010131	4	6292915	Fasting glucose or T2DM
Forward MR	rs6446482	4	6295693	Fasting glucose or T2DM
Forward MR	rs1801214	4	6303022	Fasting glucose or T2DM
Forward MR	rs6813195	4	153520475	Fasting glucose or T2DM
Forward MR	rs4691380	4	157720124	Fasting glucose or T2DM
Forward MR	rs17046216	4	166255704	Fasting glucose or T2DM
Forward MR	rs702634	5	53271420	Fasting glucose or T2DM
Forward MR	rs459193	5	55806751	Fasting glucose or T2DM
Forward MR	rs4457053	5	76424949	Fasting glucose or T2DM
Forward MR	rs7708285	5	76425867	Fasting glucose or T2DM
Forward MR	rs4869272	5	95539448	Fasting glucose or T2DM
Forward MR	rs13179048	5	95542726	Fasting glucose or T2DM
Forward MR	rs6235	5	95728898	Fasting glucose or T2DM
Forward MR	rs1019503	5	96254817	Fasting glucose or T2DM
Forward MR	rs17762454	6	7213200	Fasting glucose or T2DM
Forward MR	rs2714337	6	7240577	Fasting glucose or T2DM
Forward MR	rs9505118	6	7290437	Fasting glucose or T2DM
Forward MR	rs72833452	6	16204870	Fasting glucose or T2DM
Forward MR	rs4712523	6	20657564	Fasting glucose or T2DM
Forward MR	rs10946398	6	20661034	Fasting glucose or T2DM
Forward MR	rs7754840	6	20661250	Fasting glucose or T2DM
Forward MR	rs7772603	6	20665946	Fasting glucose or T2DM
Forward MR	rs7756992	6	20679709	Fasting glucose or T2DM
Forward MR	rs9356744	6	20685486	Fasting glucose or T2DM
Forward MR	rs7766070	6	20686573	Fasting glucose or T2DM
Forward MR	rs9368222	6	20686996	Fasting glucose or T2DM
Forward MR	rs2206734	6	20694884	Fasting glucose or T2DM
Forward MR	rs1800562	6	26093141	Fasting glucose or T2DM
Forward MR	rs4646949	6	34845449	Fasting glucose or T2DM
Forward MR	rs9470794	6	38106844	Fasting glucose or T2DM
Forward MR	rs10305492	6	39046794	Fasting glucose or T2DM
Forward MR	rs1535500	6	39284050	Fasting glucose or T2DM
Forward MR	rs1048886	6	71289189	Fasting glucose or T2DM
Forward MR	rs9399137	6	135419018	Fasting glucose or T2DM
Forward MR	rs11754823	6	159777178	Fasting glucose or T2DM
Forward MR	rs17168486	7	14898282	Fasting glucose or T2DM
Forward MR	rs2191349	7	15064309	Fasting glucose or T2DM
Forward MR	rs1974620	7	15065467	Fasting glucose or T2DM
Forward MR	rs864745	7	28180556	Fasting glucose or T2DM
Forward MR	rs12113122	7	28181244	Fasting glucose or T2DM
Forward MR	rs849134	7	28196222	Fasting glucose or T2DM
Forward MR	rs730497	7	44223721	Fasting glucose or T2DM
Forward MR	rs1799884	7	44229068	Fasting glucose or T2DM
Forward MR	rs6975024	7	44231886	Fasting glucose or T2DM
Forward MR	rs4607517	7	44235668	Fasting glucose or T2DM
Forward MR	rs2908282	7	44248828	Fasting glucose or T2DM
Forward MR	rs6943153	7	50791579	Fasting glucose or T2DM
Forward MR	rs6467136	7	127164958	Fasting glucose or T2DM
Forward MR	rs972283	7	130466854	Fasting glucose or T2DM
Forward MR	rs983309	8	9177732	Fasting glucose or T2DM
Forward MR	rs4841132	8	9183596	Fasting glucose or T2DM
Forward MR	rs11782386	8	9201787	Fasting glucose or T2DM
Forward MR	rs516946	8	41519248	Fasting glucose or T2DM
Forward MR	rs515071	8	41519462	Fasting glucose or T2DM
Forward MR	rs6474359	8	41549194	Fasting glucose or T2DM
Forward MR	rs4737009	8	41630405	Fasting glucose or T2DM
Forward MR	rs906290	8	41693768	Fasting glucose or T2DM
Forward MR	rs896854	8	95960511	Fasting glucose or T2DM
Forward MR	rs13266634	8	118184783	Fasting glucose or T2DM
Forward MR	rs3802177	8	118185025	Fasting glucose or T2DM
Forward MR	rs11558471	8	118185733	Fasting glucose or T2DM
Forward MR	rs10815355	9	622523	Fasting glucose or T2DM
Forward MR	rs7041847	9	4287466	Fasting glucose or T2DM
Forward MR	rs7034200	9	4289050	Fasting glucose or T2DM
Forward MR	rs4237150	9	4290085	Fasting glucose or T2DM
Forward MR	rs10814916	9	4293150	Fasting glucose or T2DM
Forward MR	rs17584499	9	8879118	Fasting glucose or T2DM
Forward MR	rs10810632	9	16789024	Fasting glucose or T2DM
Forward MR	rs564398	9	22029547	Fasting glucose or T2DM
Forward MR	rs2383208	9	22132076	Fasting glucose or T2DM
Forward MR	rs10965250	9	22133284	Fasting glucose or T2DM
Forward MR	rs10757282	9	22133984	Fasting glucose or T2DM
Forward MR	rs10811661	9	22134094	Fasting glucose or T2DM
Forward MR	rs7018475	9	22137685	Fasting glucose or T2DM
Forward MR	rs13292136	9	81952128	Fasting glucose or T2DM
Forward MR	rs2796441	9	84308948	Fasting glucose or T2DM
Forward MR	rs1467311	9	110536932	Fasting glucose or T2DM
Forward MR	rs16913693	9	111680359	Fasting glucose or T2DM
Forward MR	rs651007	9	136153875	Fasting glucose or T2DM
Forward MR	rs11787792	9	139252148	Fasting glucose or T2DM
Forward MR	rs3829109	9	139256766	Fasting glucose or T2DM
Forward MR	rs11257655	10	12307894	Fasting glucose or T2DM
Forward MR	rs10906115	10	12314997	Fasting glucose or T2DM
Forward MR	rs12779790	10	12328010	Fasting glucose or T2DM
Forward MR	rs1802295	10	70931474	Fasting glucose or T2DM
Forward MR	rs16926246	10	71093392	Fasting glucose or T2DM
Forward MR	rs17476364	10	71094504	Fasting glucose or T2DM
Forward MR	rs72805692	10	71099109	Fasting glucose or T2DM
Forward MR	rs10159477	10	71099888	Fasting glucose or T2DM
Forward MR	rs12571751	10	80942631	Fasting glucose or T2DM
Forward MR	rs1111875	10	94462882	Fasting glucose or T2DM
Forward MR	rs5015480	10	94465559	Fasting glucose or T2DM
Forward MR	rs1358030	10	108123599	Fasting glucose or T2DM
Forward MR	rs553668	10	112839579	Fasting glucose or T2DM
Forward MR	rs10885122	10	113042093	Fasting glucose or T2DM
Forward MR	rs7901695	10	114754088	Fasting glucose or T2DM
Forward MR	rs4506565	10	114756041	Fasting glucose or T2DM
Forward MR	rs7903146	10	114758349	Fasting glucose or T2DM
Forward MR	rs10886471	10	121149403	Fasting glucose or T2DM
Forward MR	rs7077836	10	132751498	Fasting glucose or T2DM
Forward MR	rs540078	11	254256	Fasting glucose or T2DM
Forward MR	rs2334499	11	1696849	Fasting glucose or T2DM
Forward MR	rs3842770	11	2178670	Fasting glucose or T2DM
Forward MR	rs231362	11	2691471	Fasting glucose or T2DM
Forward MR	rs2237892	11	2839751	Fasting glucose or T2DM
Forward MR	rs163184	11	2847069	Fasting glucose or T2DM
Forward MR	rs2237895	11	2857194	Fasting glucose or T2DM
Forward MR	rs5215	11	17408630	Fasting glucose or T2DM
Forward MR	rs5219	11	17409572	Fasting glucose or T2DM
Forward MR	rs11605924	11	45873091	Fasting glucose or T2DM
Forward MR	rs10501320	11	47293799	Fasting glucose or T2DM
Forward MR	rs10838687	11	47312892	Fasting glucose or T2DM
Forward MR	rs7944584	11	47336320	Fasting glucose or T2DM
Forward MR	rs1483121	11	48333360	Fasting glucose or T2DM
Forward MR	rs174550	11	61571478	Fasting glucose or T2DM
Forward MR	rs174570	11	61597212	Fasting glucose or T2DM
Forward MR	rs11603334	11	72432985	Fasting glucose or T2DM
Forward MR	rs1552224	11	72433098	Fasting glucose or T2DM
Forward MR	rs3847554	11	92668826	Fasting glucose or T2DM
Forward MR	rs1387153	11	92673828	Fasting glucose or T2DM
Forward MR	rs10830963	11	92708710	Fasting glucose or T2DM
Forward MR	rs11063069	12	4374373	Fasting glucose or T2DM
Forward MR	rs10842994	12	27965150	Fasting glucose or T2DM
Forward MR	rs7138803	12	50247468	Fasting glucose or T2DM
Forward MR	rs1153188	12	55098996	Fasting glucose or T2DM
Forward MR	rs2657879	12	56865338	Fasting glucose or T2DM
Forward MR	rs1531343	12	66174894	Fasting glucose or T2DM
Forward MR	rs9668162	12	66268782	Fasting glucose or T2DM
Forward MR	rs7961581	12	71663102	Fasting glucose or T2DM
Forward MR	rs35767	12	102875569	Fasting glucose or T2DM
Forward MR	rs11065756	12	111338794	Fasting glucose or T2DM
Forward MR	rs12229654	12	111414461	Fasting glucose or T2DM
Forward MR	rs2074356	12	112645401	Fasting glucose or T2DM
Forward MR	rs11066453	12	113365621	Fasting glucose or T2DM
Forward MR	rs7305618	12	121402932	Fasting glucose or T2DM
Forward MR	rs7957197	12	121460686	Fasting glucose or T2DM
Forward MR	rs4275659	12	123447928	Fasting glucose or T2DM
Forward MR	rs10747083	12	133041618	Fasting glucose or T2DM
Forward MR	rs9552911	13	23864657	Fasting glucose or T2DM
Forward MR	rs11619319	13	28487599	Fasting glucose or T2DM
Forward MR	rs2293941	13	28491198	Fasting glucose or T2DM
Forward MR	rs576674	13	33554302	Fasting glucose or T2DM
Forward MR	rs1359790	13	80717156	Fasting glucose or T2DM
Forward MR	rs7998202	13	113331868	Fasting glucose or T2DM
Forward MR	rs17792599	14	21770681	Fasting glucose or T2DM
Forward MR	rs1638715	14	87518172	Fasting glucose or T2DM
Forward MR	rs3783347	14	100839261	Fasting glucose or T2DM
Forward MR	rs7403531	15	38822905	Fasting glucose or T2DM
Forward MR	rs17271305	15	62332980	Fasting glucose or T2DM
Forward MR	rs4502156	15	62383155	Fasting glucose or T2DM
Forward MR	rs7172432	15	62396389	Fasting glucose or T2DM
Forward MR	rs11071657	15	62433962	Fasting glucose or T2DM
Forward MR	rs1549318	15	71109147	Fasting glucose or T2DM
Forward MR	rs7178572	15	77747190	Fasting glucose or T2DM
Forward MR	rs7177055	15	77832762	Fasting glucose or T2DM
Forward MR	rs11634397	15	80432222	Fasting glucose or T2DM
Forward MR	rs2028299	15	90374257	Fasting glucose or T2DM
Forward MR	rs8042680	15	91521337	Fasting glucose or T2DM
Forward MR	rs2018860	15	99258710	Fasting glucose or T2DM
Forward MR	rs8050136	16	53816275	Fasting glucose or T2DM
Forward MR	rs9939609	16	53820527	Fasting glucose or T2DM
Forward MR	rs11642841	16	53845487	Fasting glucose or T2DM
Forward MR	rs7202877	16	75247245	Fasting glucose or T2DM
Forward MR	rs9933309	16	88844932	Fasting glucose or T2DM
Forward MR	rs4523957	17	2208899	Fasting glucose or T2DM
Forward MR	rs391300	17	2216258	Fasting glucose or T2DM
Forward MR	rs4790333	17	2262703	Fasting glucose or T2DM
Forward MR	rs4430796	17	36098040	Fasting glucose or T2DM
Forward MR	rs7501939	17	36101156	Fasting glucose or T2DM
Forward MR	rs9303394	17	55610343	Fasting glucose or T2DM
Forward MR	rs1046875	17	80685426	Fasting glucose or T2DM
Forward MR	rs1046896	17	80685533	Fasting glucose or T2DM
Forward MR	rs8090011	18	7068462	Fasting glucose or T2DM
Forward MR	rs17782313	18	57851097	Fasting glucose or T2DM
Forward MR	rs12970134	18	57884750	Fasting glucose or T2DM
Forward MR	rs11667918	19	17232499	Fasting glucose or T2DM
Forward MR	rs10401969	19	19407718	Fasting glucose or T2DM
Forward MR	rs3794991	19	19610596	Fasting glucose or T2DM
Forward MR	rs3786897	19	33893008	Fasting glucose or T2DM
Forward MR	rs8108269	19	46158513	Fasting glucose or T2DM
Forward MR	rs10423928	19	46182304	Fasting glucose or T2DM
Forward MR	rs2302593	19	46196634	Fasting glucose or T2DM
Forward MR	rs6133998	20	10681095	Fasting glucose or T2DM
Forward MR	rs6113722	20	22557099	Fasting glucose or T2DM
Forward MR	rs6048205	20	22559601	Fasting glucose or T2DM
Forward MR	rs6048216	20	22581268	Fasting glucose or T2DM
Forward MR	rs6072275	20	39743905	Fasting glucose or T2DM
Forward MR	rs6130482	20	42557999	Fasting glucose or T2DM
Forward MR	rs6017317	20	42946966	Fasting glucose or T2DM
Forward MR	rs4812829	20	42989267	Fasting glucose or T2DM
Forward MR	rs12172913	21	21208597	Fasting glucose or T2DM
Forward MR	rs855791	22	37462936	Fasting glucose or T2DM
Backward MR	rs102275	11	61557803	Lysophosphatidylcholine alkyl-acyl 16:1
Backward MR	rs1535	11	61597972	Lysophosphatidylcholine alkyl-acyl 16:1
Backward MR	rs174535	11	61551356	Lysophosphatidylcholine alkyl-acyl 16:1
Backward MR	rs174536	11	61551927	Lysophosphatidylcholine alkyl-acyl 16:1
Backward MR	rs174537	11	61552680	Lysophosphatidylcholine alkyl-acyl 16:1
Backward MR	rs174541	11	61565908	Lysophosphatidylcholine alkyl-acyl 16:1
Backward MR	rs174545	11	61569306	Lysophosphatidylcholine alkyl-acyl 16:1
Backward MR	rs174546	11	61569830	Lysophosphatidylcholine alkyl-acyl 16:1
Backward MR	rs174547	11	61570783	Lysophosphatidylcholine alkyl-acyl 16:1
Backward MR	rs174548	11	61571348	Lysophosphatidylcholine alkyl-acyl 16:1
Backward MR	rs174549	11	61571382	Lysophosphatidylcholine alkyl-acyl 16:1
Backward MR	rs174550	11	61571478	Lysophosphatidylcholine alkyl-acyl 16:1
Backward MR	rs174555	11	61579760	Lysophosphatidylcholine alkyl-acyl 16:1
Backward MR	rs174556	11	61580635	Lysophosphatidylcholine alkyl-acyl 16:1
Backward MR	rs174576	11	61603510	Lysophosphatidylcholine alkyl-acyl 16:1
Backward MR	rs174577	11	61604814	Lysophosphatidylcholine alkyl-acyl 16:1
Backward MR	rs174583	11	61609750	Lysophosphatidylcholine alkyl-acyl 16:1
Backward MR	rs102275	11	61557803	Phosphatidylcholine diacyl 34:4
Backward MR	rs1535	11	61597972	Phosphatidylcholine diacyl 34:4
Backward MR	rs174535	11	61551356	Phosphatidylcholine diacyl 34:4
Backward MR	rs174536	11	61551927	Phosphatidylcholine diacyl 34:4
Backward MR	rs174537	11	61552680	Phosphatidylcholine diacyl 34:4
Backward MR	rs174541	11	61565908	Phosphatidylcholine diacyl 34:4
Backward MR	rs174545	11	61569306	Phosphatidylcholine diacyl 34:4
Backward MR	rs174546	11	61569830	Phosphatidylcholine diacyl 34:4
Backward MR	rs174547	11	61570783	Phosphatidylcholine diacyl 34:4
Backward MR	rs174548	11	61571348	Phosphatidylcholine diacyl 34:4
Backward MR	rs174549	11	61571382	Phosphatidylcholine diacyl 34:4
Backward MR	rs174550	11	61571478	Phosphatidylcholine diacyl 34:4
Backward MR	rs174555	11	61579760	Phosphatidylcholine diacyl 34:4
Backward MR	rs174556	11	61580635	Phosphatidylcholine diacyl 34:4
Backward MR	rs174576	11	61603510	Phosphatidylcholine diacyl 34:4
Backward MR	rs174577	11	61604814	Phosphatidylcholine diacyl 34:4
Backward MR	rs174583	11	61609750	Phosphatidylcholine diacyl 34:4
Backward MR	rs2072114	11	61605215	Phosphatidylcholine diacyl 34:4
Backward MR	rs2524299	11	61604782	Phosphatidylcholine diacyl 34:4
Backward MR	rs2727270	11	61603237	Phosphatidylcholine diacyl 34:4
Backward MR	rs2727271	11	61603358	Phosphatidylcholine diacyl 34:4
Backward MR	rs174548	11	61571348	Phosphatidylcholine diacyl 38:3
Backward MR	rs174549	11	61571382	Phosphatidylcholine diacyl 38:3
Backward MR	rs174555	11	61579760	Phosphatidylcholine diacyl 38:3
Backward MR	rs102275	11	61557803	Phosphatidylcholine diacyl 38:4
Backward MR	rs1535	11	61597972	Phosphatidylcholine diacyl 38:4
Backward MR	rs174535	11	61551356	Phosphatidylcholine diacyl 38:4
Backward MR	rs174536	11	61551927	Phosphatidylcholine diacyl 38:4
Backward MR	rs174537	11	61552680	Phosphatidylcholine diacyl 38:4
Backward MR	rs174541	11	61565908	Phosphatidylcholine diacyl 38:4
Backward MR	rs174545	11	61569306	Phosphatidylcholine diacyl 38:4
Backward MR	rs174546	11	61569830	Phosphatidylcholine diacyl 38:4
Backward MR	rs174547	11	61570783	Phosphatidylcholine diacyl 38:4
Backward MR	rs174548	11	61571348	Phosphatidylcholine diacyl 38:4
Backward MR	rs174549	11	61571382	Phosphatidylcholine diacyl 38:4
Backward MR	rs174550	11	61571478	Phosphatidylcholine diacyl 38:4
Backward MR	rs174555	11	61579760	Phosphatidylcholine diacyl 38:4
Backward MR	rs174556	11	61580635	Phosphatidylcholine diacyl 38:4
Backward MR	rs174576	11	61603510	Phosphatidylcholine diacyl 38:4
Backward MR	rs174577	11	61604814	Phosphatidylcholine diacyl 38:4
Backward MR	rs174583	11	61609750	Phosphatidylcholine diacyl 38:4
Backward MR	rs2072114	11	61605215	Phosphatidylcholine diacyl 38:4
Backward MR	rs2524299	11	61604782	Phosphatidylcholine diacyl 38:4
Backward MR	rs2727270	11	61603237	Phosphatidylcholine diacyl 38:4
Backward MR	rs2727271	11	61603358	Phosphatidylcholine diacyl 38:4
Backward MR	rs102275	11	61557803	Phosphatidylcholine diacyl 40:4
Backward MR	rs1535	11	61597972	Phosphatidylcholine diacyl 40:4
Backward MR	rs174535	11	61551356	Phosphatidylcholine diacyl 40:4
Backward MR	rs174536	11	61551927	Phosphatidylcholine diacyl 40:4
Backward MR	rs174537	11	61552680	Phosphatidylcholine diacyl 40:4
Backward MR	rs174541	11	61565908	Phosphatidylcholine diacyl 40:4
Backward MR	rs174545	11	61569306	Phosphatidylcholine diacyl 40:4
Backward MR	rs174546	11	61569830	Phosphatidylcholine diacyl 40:4
Backward MR	rs174547	11	61570783	Phosphatidylcholine diacyl 40:4
Backward MR	rs174548	11	61571348	Phosphatidylcholine diacyl 40:4
Backward MR	rs174549	11	61571382	Phosphatidylcholine diacyl 40:4
Backward MR	rs174550	11	61571478	Phosphatidylcholine diacyl 40:4
Backward MR	rs174555	11	61579760	Phosphatidylcholine diacyl 40:4
Backward MR	rs174556	11	61580635	Phosphatidylcholine diacyl 40:4
Backward MR	rs174576	11	61603510	Phosphatidylcholine diacyl 40:4
Backward MR	rs174577	11	61604814	Phosphatidylcholine diacyl 40:4
Backward MR	rs174583	11	61609750	Phosphatidylcholine diacyl 40:4
Backward MR	rs2072114	11	61605215	Phosphatidylcholine diacyl 40:4
Backward MR	rs2524299	11	61604782	Phosphatidylcholine diacyl 40:4
Backward MR	rs2727270	11	61603237	Phosphatidylcholine diacyl 40:4
Backward MR	rs2727271	11	61603358	Phosphatidylcholine diacyl 40:4
Backward MR	rs102275	11	61557803	Phosphatidylcholine diacyl 34:4
Backward MR	rs1260333	2	27748624	Phosphatidylcholine diacyl 34:4
Backward MR	rs1535	11	61597972	Phosphatidylcholine diacyl 34:4
Backward MR	rs174535	11	61551356	Phosphatidylcholine diacyl 34:4
Backward MR	rs174536	11	61551927	Phosphatidylcholine diacyl 34:4
Backward MR	rs174537	11	61552680	Phosphatidylcholine diacyl 34:4
Backward MR	rs174541	11	61565908	Phosphatidylcholine diacyl 34:4
Backward MR	rs174545	11	61569306	Phosphatidylcholine diacyl 34:4
Backward MR	rs174546	11	61569830	Phosphatidylcholine diacyl 34:4
Backward MR	rs174547	11	61570783	Phosphatidylcholine diacyl 34:4
Backward MR	rs174548	11	61571348	Phosphatidylcholine diacyl 34:4
Backward MR	rs174549	11	61571382	Phosphatidylcholine diacyl 34:4
Backward MR	rs174550	11	61571478	Phosphatidylcholine diacyl 34:4
Backward MR	rs174555	11	61579760	Phosphatidylcholine diacyl 34:4
Backward MR	rs174556	11	61580635	Phosphatidylcholine diacyl 34:4
Backward MR	rs174576	11	61603510	Phosphatidylcholine diacyl 34:4
Backward MR	rs174577	11	61604814	Phosphatidylcholine diacyl 34:4
Backward MR	rs174583	11	61609750	Phosphatidylcholine diacyl 34:4
Backward MR	rs2072114	11	61605215	Phosphatidylcholine diacyl 34:4
Backward MR	rs2524299	11	61604782	Phosphatidylcholine diacyl 34:4
Backward MR	rs2727270	11	61603237	Phosphatidylcholine diacyl 34:4
Backward MR	rs2727271	11	61603358	Phosphatidylcholine diacyl 34:4
Backward MR	rs4246215	11	61564299	Phosphatidylcholine diacyl 34:4
Backward MR	rs102275	11	61557803	Phosphatidylcholine diacyl 38:4
Backward MR	rs1535	11	61597972	Phosphatidylcholine diacyl 38:4
Backward MR	rs174535	11	61551356	Phosphatidylcholine diacyl 38:4
Backward MR	rs174536	11	61551927	Phosphatidylcholine diacyl 38:4
Backward MR	rs174537	11	61552680	Phosphatidylcholine diacyl 38:4
Backward MR	rs174541	11	61565908	Phosphatidylcholine diacyl 38:4
Backward MR	rs174545	11	61569306	Phosphatidylcholine diacyl 38:4
Backward MR	rs174546	11	61569830	Phosphatidylcholine diacyl 38:4
Backward MR	rs174547	11	61570783	Phosphatidylcholine diacyl 38:4
Backward MR	rs174548	11	61571348	Phosphatidylcholine diacyl 38:4
Backward MR	rs174549	11	61571382	Phosphatidylcholine diacyl 38:4
Backward MR	rs174550	11	61571478	Phosphatidylcholine diacyl 38:4
Backward MR	rs174555	11	61579760	Phosphatidylcholine diacyl 38:4
Backward MR	rs174556	11	61580635	Phosphatidylcholine diacyl 38:4
Backward MR	rs174576	11	61603510	Phosphatidylcholine diacyl 38:4
Backward MR	rs174577	11	61604814	Phosphatidylcholine diacyl 38:4
Backward MR	rs174583	11	61609750	Phosphatidylcholine diacyl 38:4
Backward MR	rs2072114	11	61605215	Phosphatidylcholine diacyl 38:4
Backward MR	rs2524299	11	61604782	Phosphatidylcholine diacyl 38:4
Backward MR	rs2727270	11	61603237	Phosphatidylcholine diacyl 38:4
Backward MR	rs2727271	11	61603358	Phosphatidylcholine diacyl 38:4
Backward MR	rs4246215	11	61564299	Phosphatidylcholine diacyl 38:4
Backward MR	rs102275	11	61557803	Phosphatidylcholine diacyl 40:6
Backward MR	rs1535	11	61597972	Phosphatidylcholine diacyl 40:6
Backward MR	rs174535	11	61551356	Phosphatidylcholine diacyl 40:6
Backward MR	rs174536	11	61551927	Phosphatidylcholine diacyl 40:6
Backward MR	rs174537	11	61552680	Phosphatidylcholine diacyl 40:6
Backward MR	rs174541	11	61565908	Phosphatidylcholine diacyl 40:6
Backward MR	rs174545	11	61569306	Phosphatidylcholine diacyl 40:6
Backward MR	rs174546	11	61569830	Phosphatidylcholine diacyl 40:6
Backward MR	rs174547	11	61570783	Phosphatidylcholine diacyl 40:6
Backward MR	rs174548	11	61571348	Phosphatidylcholine diacyl 40:6
Backward MR	rs174549	11	61571382	Phosphatidylcholine diacyl 40:6
Backward MR	rs174550	11	61571478	Phosphatidylcholine diacyl 40:6
Backward MR	rs174555	11	61579760	Phosphatidylcholine diacyl 40:6
Backward MR	rs174556	11	61580635	Phosphatidylcholine diacyl 40:6
Backward MR	rs174576	11	61603510	Phosphatidylcholine diacyl 40:6
Backward MR	rs174577	11	61604814	Phosphatidylcholine diacyl 40:6
Backward MR	rs174583	11	61609750	Phosphatidylcholine diacyl 40:6
Backward MR	rs4246215	11	61564299	Phosphatidylcholine diacyl 40:6
Backward MR	rs102275	11	61557803	Phosphatidylcholine diacyl 42:0
Backward MR	rs1535	11	61597972	Phosphatidylcholine diacyl 42:0
Backward MR	rs174535	11	61551356	Phosphatidylcholine diacyl 42:0
Backward MR	rs174536	11	61551927	Phosphatidylcholine diacyl 42:0
Backward MR	rs174537	11	61552680	Phosphatidylcholine diacyl 42:0
Backward MR	rs174541	11	61565908	Phosphatidylcholine diacyl 42:0
Backward MR	rs174545	11	61569306	Phosphatidylcholine diacyl 42:0
Backward MR	rs174546	11	61569830	Phosphatidylcholine diacyl 42:0
Backward MR	rs174547	11	61570783	Phosphatidylcholine diacyl 42:0
Backward MR	rs174548	11	61571348	Phosphatidylcholine diacyl 42:0
Backward MR	rs174549	11	61571382	Phosphatidylcholine diacyl 42:0
Backward MR	rs174550	11	61571478	Phosphatidylcholine diacyl 42:0
Backward MR	rs174555	11	61579760	Phosphatidylcholine diacyl 42:0
Backward MR	rs174556	11	61580635	Phosphatidylcholine diacyl 42:0
Backward MR	rs174576	11	61603510	Phosphatidylcholine diacyl 42:0
Backward MR	rs174577	11	61604814	Phosphatidylcholine diacyl 42:0
Backward MR	rs174583	11	61609750	Phosphatidylcholine diacyl 42:0
Backward MR	rs2072114	11	61605215	Phosphatidylcholine diacyl 42:0
Backward MR	rs2524299	11	61604782	Phosphatidylcholine diacyl 42:0
Backward MR	rs2727270	11	61603237	Phosphatidylcholine diacyl 42:0
Backward MR	rs2727271	11	61603358	Phosphatidylcholine diacyl 42:0
Backward MR	rs4246215	11	61564299	Phosphatidylcholine diacyl 42:0
Backward MR	rs102275	11	61557803	Phosphatidylethanolamine 38:4
Backward MR	rs1535	11	61597972	Phosphatidylethanolamine 38:4
Backward MR	rs174535	11	61551356	Phosphatidylethanolamine 38:4
Backward MR	rs174536	11	61551927	Phosphatidylethanolamine 38:4
Backward MR	rs174537	11	61552680	Phosphatidylethanolamine 38:4
Backward MR	rs174541	11	61565908	Phosphatidylethanolamine 38:4
Backward MR	rs174545	11	61569306	Phosphatidylethanolamine 38:4
Backward MR	rs174546	11	61569830	Phosphatidylethanolamine 38:4
Backward MR	rs174547	11	61570783	Phosphatidylethanolamine 38:4
Backward MR	rs174548	11	61571348	Phosphatidylethanolamine 38:4
Backward MR	rs174549	11	61571382	Phosphatidylethanolamine 38:4
Backward MR	rs174550	11	61571478	Phosphatidylethanolamine 38:4
Backward MR	rs174555	11	61579760	Phosphatidylethanolamine 38:4
Backward MR	rs174556	11	61580635	Phosphatidylethanolamine 38:4
Backward MR	rs174576	11	61603510	Phosphatidylethanolamine 38:4
Backward MR	rs174577	11	61604814	Phosphatidylethanolamine 38:4
Backward MR	rs174583	11	61609750	Phosphatidylethanolamine 38:4
Backward MR	rs4246215	11	61564299	Phosphatidylethanolamine 38:4
Backward MR	rs1260326	2	27730940	Alanine
Backward MR	rs1260333	2	27748624	Alanine
Backward MR	rs780093	2	27742603	Alanine
Backward MR	rs780094	2	27741237	Alanine
Backward MR	rs1260326	2	27730940	Isoleucine
Backward MR	rs1260333	2	27748624	Isoleucine
Backward MR	rs780093	2	27742603	Isoleucine
Backward MR	rs780094	2	27741237	Isoleucine
Backward MR	rs1260326	2	27730940	Leucine
Backward MR	rs780093	2	27742603	Leucine
Backward MR	rs780094	2	27741237	Leucine
Backward MR	rs102275	11	61557803	Phosphatidylcholine alkyl-acyl 36:2
Backward MR	rs1535	11	61597972	Phosphatidylcholine alkyl-acyl 36:2
Backward MR	rs174535	11	61551356	Phosphatidylcholine alkyl-acyl 36:2
Backward MR	rs174536	11	61551927	Phosphatidylcholine alkyl-acyl 36:2
Backward MR	rs174537	11	61552680	Phosphatidylcholine alkyl-acyl 36:2
Backward MR	rs174541	11	61565908	Phosphatidylcholine alkyl-acyl 36:2
Backward MR	rs174545	11	61569306	Phosphatidylcholine alkyl-acyl 36:2
Backward MR	rs174546	11	61569830	Phosphatidylcholine alkyl-acyl 36:2
Backward MR	rs174547	11	61570783	Phosphatidylcholine alkyl-acyl 36:2
Backward MR	rs174548	11	61571348	Phosphatidylcholine alkyl-acyl 36:2
Backward MR	rs174549	11	61571382	Phosphatidylcholine alkyl-acyl 36:2
Backward MR	rs174550	11	61571478	Phosphatidylcholine alkyl-acyl 36:2
Backward MR	rs174555	11	61579760	Phosphatidylcholine alkyl-acyl 36:2
Backward MR	rs174556	11	61580635	Phosphatidylcholine alkyl-acyl 36:2
Backward MR	rs174576	11	61603510	Phosphatidylcholine alkyl-acyl 36:2
Backward MR	rs174577	11	61604814	Phosphatidylcholine alkyl-acyl 36:2
Backward MR	rs174583	11	61609750	Phosphatidylcholine alkyl-acyl 36:2
Backward MR	rs2072114	11	61605215	Phosphatidylcholine alkyl-acyl 36:2
Backward MR	rs2524299	11	61604782	Phosphatidylcholine alkyl-acyl 36:2
Backward MR	rs2727270	11	61603237	Phosphatidylcholine alkyl-acyl 36:2
Backward MR	rs2727271	11	61603358	Phosphatidylcholine alkyl-acyl 36:2
Backward MR	rs4246215	11	61564299	Phosphatidylcholine alkyl-acyl 36:2
Backward MR	rs102275	11	61557803	Phosphatidylcholine alkyl-acyl 42:4
Backward MR	rs1535	11	61597972	Phosphatidylcholine alkyl-acyl 42:4
Backward MR	rs174535	11	61551356	Phosphatidylcholine alkyl-acyl 42:4
Backward MR	rs174536	11	61551927	Phosphatidylcholine alkyl-acyl 42:4
Backward MR	rs174537	11	61552680	Phosphatidylcholine alkyl-acyl 42:4
Backward MR	rs174541	11	61565908	Phosphatidylcholine alkyl-acyl 42:4
Backward MR	rs174545	11	61569306	Phosphatidylcholine alkyl-acyl 42:4
Backward MR	rs174546	11	61569830	Phosphatidylcholine alkyl-acyl 42:4
Backward MR	rs174547	11	61570783	Phosphatidylcholine alkyl-acyl 42:4
Backward MR	rs174576	11	61603510	Phosphatidylcholine alkyl-acyl 42:4
Backward MR	rs174577	11	61604814	Phosphatidylcholine alkyl-acyl 42:4
Backward MR	rs4246215	11	61564299	Phosphatidylcholine alkyl-acyl 42:4
Backward MR	rs102275	11	61557803	Phosphatidylcholine alkyl-acyl 42:5
Backward MR	rs1535	11	61597972	Phosphatidylcholine alkyl-acyl 42:5
Backward MR	rs174535	11	61551356	Phosphatidylcholine alkyl-acyl 42:5
Backward MR	rs174536	11	61551927	Phosphatidylcholine alkyl-acyl 42:5
Backward MR	rs174537	11	61552680	Phosphatidylcholine alkyl-acyl 42:5
Backward MR	rs174541	11	61565908	Phosphatidylcholine alkyl-acyl 42:5
Backward MR	rs174545	11	61569306	Phosphatidylcholine alkyl-acyl 42:5
Backward MR	rs174546	11	61569830	Phosphatidylcholine alkyl-acyl 42:5
Backward MR	rs174547	11	61570783	Phosphatidylcholine alkyl-acyl 42:5
Backward MR	rs174548	11	61571348	Phosphatidylcholine alkyl-acyl 42:5
Backward MR	rs174549	11	61571382	Phosphatidylcholine alkyl-acyl 42:5
Backward MR	rs174550	11	61571478	Phosphatidylcholine alkyl-acyl 42:5
Backward MR	rs174555	11	61579760	Phosphatidylcholine alkyl-acyl 42:5
Backward MR	rs174556	11	61580635	Phosphatidylcholine alkyl-acyl 42:5
Backward MR	rs174576	11	61603510	Phosphatidylcholine alkyl-acyl 42:5
Backward MR	rs174577	11	61604814	Phosphatidylcholine alkyl-acyl 42:5
Backward MR	rs174583	11	61609750	Phosphatidylcholine alkyl-acyl 42:5
Backward MR	rs2072114	11	61605215	Phosphatidylcholine alkyl-acyl 42:5
Backward MR	rs2524299	11	61604782	Phosphatidylcholine alkyl-acyl 42:5
Backward MR	rs2727270	11	61603237	Phosphatidylcholine alkyl-acyl 42:5
Backward MR	rs2727271	11	61603358	Phosphatidylcholine alkyl-acyl 42:5
Backward MR	rs4246215	11	61564299	Phosphatidylcholine alkyl-acyl 42:5
Backward MR	rs102275	11	61557803	Phosphatidylcholine alkyl-acyl 44:5
Backward MR	rs1535	11	61597972	Phosphatidylcholine alkyl-acyl 44:5
Backward MR	rs174535	11	61551356	Phosphatidylcholine alkyl-acyl 44:5
Backward MR	rs174536	11	61551927	Phosphatidylcholine alkyl-acyl 44:5
Backward MR	rs174537	11	61552680	Phosphatidylcholine alkyl-acyl 44:5
Backward MR	rs174541	11	61565908	Phosphatidylcholine alkyl-acyl 44:5
Backward MR	rs174545	11	61569306	Phosphatidylcholine alkyl-acyl 44:5
Backward MR	rs174546	11	61569830	Phosphatidylcholine alkyl-acyl 44:5
Backward MR	rs174547	11	61570783	Phosphatidylcholine alkyl-acyl 44:5
Backward MR	rs174548	11	61571348	Phosphatidylcholine alkyl-acyl 44:5
Backward MR	rs174549	11	61571382	Phosphatidylcholine alkyl-acyl 44:5
Backward MR	rs174550	11	61571478	Phosphatidylcholine alkyl-acyl 44:5
Backward MR	rs174555	11	61579760	Phosphatidylcholine alkyl-acyl 44:5
Backward MR	rs174556	11	61580635	Phosphatidylcholine alkyl-acyl 44:5
Backward MR	rs174576	11	61603510	Phosphatidylcholine alkyl-acyl 44:5
Backward MR	rs174577	11	61604814	Phosphatidylcholine alkyl-acyl 44:5
Backward MR	rs174583	11	61609750	Phosphatidylcholine alkyl-acyl 44:5
Backward MR	rs2072114	11	61605215	Phosphatidylcholine alkyl-acyl 44:5
Backward MR	rs2524299	11	61604782	Phosphatidylcholine alkyl-acyl 44:5
Backward MR	rs2727270	11	61603237	Phosphatidylcholine alkyl-acyl 44:5
Backward MR	rs2727271	11	61603358	Phosphatidylcholine alkyl-acyl 44:5
Backward MR	rs4246215	11	61564299	Phosphatidylcholine alkyl-acyl 44:5
Backward MR	rs102275	11	61557803	Phosphatidylcholine alkyl-acyl 44:6
Backward MR	rs1535	11	61597972	Phosphatidylcholine alkyl-acyl 44:6
Backward MR	rs174535	11	61551356	Phosphatidylcholine alkyl-acyl 44:6
Backward MR	rs174536	11	61551927	Phosphatidylcholine alkyl-acyl 44:6
Backward MR	rs174537	11	61552680	Phosphatidylcholine alkyl-acyl 44:6
Backward MR	rs174541	11	61565908	Phosphatidylcholine alkyl-acyl 44:6
Backward MR	rs174545	11	61569306	Phosphatidylcholine alkyl-acyl 44:6
Backward MR	rs174546	11	61569830	Phosphatidylcholine alkyl-acyl 44:6
Backward MR	rs174547	11	61570783	Phosphatidylcholine alkyl-acyl 44:6
Backward MR	rs174548	11	61571348	Phosphatidylcholine alkyl-acyl 44:6
Backward MR	rs174549	11	61571382	Phosphatidylcholine alkyl-acyl 44:6
Backward MR	rs174550	11	61571478	Phosphatidylcholine alkyl-acyl 44:6
Backward MR	rs174555	11	61579760	Phosphatidylcholine alkyl-acyl 44:6
Backward MR	rs174556	11	61580635	Phosphatidylcholine alkyl-acyl 44:6
Backward MR	rs174576	11	61603510	Phosphatidylcholine alkyl-acyl 44:6
Backward MR	rs174577	11	61604814	Phosphatidylcholine alkyl-acyl 44:6
Backward MR	rs174583	11	61609750	Phosphatidylcholine alkyl-acyl 44:6
Backward MR	rs2072114	11	61605215	Phosphatidylcholine alkyl-acyl 44:6
Backward MR	rs2524299	11	61604782	Phosphatidylcholine alkyl-acyl 44:6
Backward MR	rs2727270	11	61603237	Phosphatidylcholine alkyl-acyl 44:6
Backward MR	rs2727271	11	61603358	Phosphatidylcholine alkyl-acyl 44:6
Backward MR	rs4246215	11	61564299	Phosphatidylcholine alkyl-acyl 44:6
Backward MR	rs102275	11	61557803	Phosphatidylcholine alkyl-acyl 36:2
Backward MR	rs1535	11	61597972	Phosphatidylcholine alkyl-acyl 36:2
Backward MR	rs174535	11	61551356	Phosphatidylcholine alkyl-acyl 36:2
Backward MR	rs174536	11	61551927	Phosphatidylcholine alkyl-acyl 36:2
Backward MR	rs174537	11	61552680	Phosphatidylcholine alkyl-acyl 36:2
Backward MR	rs174541	11	61565908	Phosphatidylcholine alkyl-acyl 36:2
Backward MR	rs174545	11	61569306	Phosphatidylcholine alkyl-acyl 36:2
Backward MR	rs174546	11	61569830	Phosphatidylcholine alkyl-acyl 36:2
Backward MR	rs174547	11	61570783	Phosphatidylcholine alkyl-acyl 36:2
Backward MR	rs174548	11	61571348	Phosphatidylcholine alkyl-acyl 36:2
Backward MR	rs174549	11	61571382	Phosphatidylcholine alkyl-acyl 36:2
Backward MR	rs174550	11	61571478	Phosphatidylcholine alkyl-acyl 36:2
Backward MR	rs174555	11	61579760	Phosphatidylcholine alkyl-acyl 36:2
Backward MR	rs174556	11	61580635	Phosphatidylcholine alkyl-acyl 36:2
Backward MR	rs174576	11	61603510	Phosphatidylcholine alkyl-acyl 36:2
Backward MR	rs174577	11	61604814	Phosphatidylcholine alkyl-acyl 36:2
Backward MR	rs174583	11	61609750	Phosphatidylcholine alkyl-acyl 36:2
Backward MR	rs2072114	11	61605215	Phosphatidylcholine alkyl-acyl 36:2
Backward MR	rs2524299	11	61604782	Phosphatidylcholine alkyl-acyl 36:2
Backward MR	rs2727270	11	61603237	Phosphatidylcholine alkyl-acyl 36:2
Backward MR	rs2727271	11	61603358	Phosphatidylcholine alkyl-acyl 36:2
Backward MR	rs102275	11	61557803	Phosphatidylcholine alkyl-acyl 36:3
Backward MR	rs1535	11	61597972	Phosphatidylcholine alkyl-acyl 36:3
Backward MR	rs174535	11	61551356	Phosphatidylcholine alkyl-acyl 36:3
Backward MR	rs174536	11	61551927	Phosphatidylcholine alkyl-acyl 36:3
Backward MR	rs174537	11	61552680	Phosphatidylcholine alkyl-acyl 36:3
Backward MR	rs174541	11	61565908	Phosphatidylcholine alkyl-acyl 36:3
Backward MR	rs174545	11	61569306	Phosphatidylcholine alkyl-acyl 36:3
Backward MR	rs174546	11	61569830	Phosphatidylcholine alkyl-acyl 36:3
Backward MR	rs174547	11	61570783	Phosphatidylcholine alkyl-acyl 36:3
Backward MR	rs174548	11	61571348	Phosphatidylcholine alkyl-acyl 36:3
Backward MR	rs174549	11	61571382	Phosphatidylcholine alkyl-acyl 36:3
Backward MR	rs174550	11	61571478	Phosphatidylcholine alkyl-acyl 36:3
Backward MR	rs174555	11	61579760	Phosphatidylcholine alkyl-acyl 36:3
Backward MR	rs174556	11	61580635	Phosphatidylcholine alkyl-acyl 36:3
Backward MR	rs174576	11	61603510	Phosphatidylcholine alkyl-acyl 36:3
Backward MR	rs174577	11	61604814	Phosphatidylcholine alkyl-acyl 36:3
Backward MR	rs174583	11	61609750	Phosphatidylcholine alkyl-acyl 36:3
Backward MR	rs2072114	11	61605215	Phosphatidylcholine alkyl-acyl 36:3
Backward MR	rs2524299	11	61604782	Phosphatidylcholine alkyl-acyl 36:3
Backward MR	rs2727270	11	61603237	Phosphatidylcholine alkyl-acyl 36:3
Backward MR	rs2727271	11	61603358	Phosphatidylcholine alkyl-acyl 36:3
Backward MR	rs102275	11	61557803	Lactate
Backward MR	rs1260326	2	27730940	Lactate
Backward MR	rs1535	11	61597972	Lactate
Backward MR	rs174535	11	61551356	Lactate
Backward MR	rs174536	11	61551927	Lactate
Backward MR	rs174537	11	61552680	Lactate
Backward MR	rs174541	11	61565908	Lactate
Backward MR	rs174545	11	61569306	Lactate
Backward MR	rs174546	11	61569830	Lactate
Backward MR	rs174547	11	61570783	Lactate
Backward MR	rs174548	11	61571348	Lactate
Backward MR	rs174549	11	61571382	Lactate
Backward MR	rs174550	11	61571478	Lactate
Backward MR	rs174555	11	61579760	Lactate
Backward MR	rs174556	11	61580635	Lactate
Backward MR	rs174576	11	61603510	Lactate
Backward MR	rs174577	11	61604814	Lactate
Backward MR	rs174583	11	61609750	Lactate
Backward MR	rs2072114	11	61605215	Lactate
Backward MR	rs2524299	11	61604782	Lactate
Backward MR	rs2727270	11	61603237	Lactate
Backward MR	rs2727271	11	61603358	Lactate
Backward MR	rs4246215	11	61564299	Lactate
Backward MR	rs780093	2	27742603	Lactate
Backward MR	rs780094	2	27741237	Lactate
Backward MR	rs1260326	2	27730940	Pyruvate/Oxaloacetate
Backward MR	rs1260333	2	27748624	Pyruvate/Oxaloacetate
Backward MR	rs780093	2	27742603	Pyruvate/Oxaloacetate
Backward MR	rs780094	2	27741237	Pyruvate/Oxaloacetate
Backward MR	rs780093	2	27742603	Triglycerides 48:1
Backward MR	rs780093	2	27742603	Triglycerides 48:2
Backward MR	rs780093	2	27742603	Triglycerides 50:1
Backward MR	rs780093	2	27742603	Triglycerides 50:2
Backward MR	rs780093	2	27742603	Triglycerides 50:3
Backward MR	rs780093	2	27742603	Triglycerides 50:4
Backward MR	rs1260326	2	27730940	Plasma-triglycerides
Backward MR	rs1260333	2	27748624	Plasma-triglycerides
Backward MR	rs780093	2	27742603	Plasma-triglycerides
Backward MR	rs780094	2	27741237	Plasma-triglycerides
Backward MR	rs780093	2	27742603	XXL-VLDL-free cholesterol
Backward MR	rs1260326	2	27730940	XXL-VLDL-phospholipids
Backward MR	rs1260333	2	27748624	XXL-VLDL-phospholipids
Backward MR	rs780093	2	27742603	XXL-VLDL-phospholipids
Backward MR	rs780094	2	27741237	XXL-VLDL-phospholipids
Backward MR	rs1260326	2	27730940	XXL-VLDL-triglycerides
Backward MR	rs1260333	2	27748624	XXL-VLDL-triglycerides
Backward MR	rs780093	2	27742603	XXL-VLDL-triglycerides
Backward MR	rs780094	2	27741237	XXL-VLDL-triglycerides
Backward MR	rs1260326	2	27730940	M-VLDL-triglycerides
Backward MR	rs1260333	2	27748624	M-VLDL-triglycerides
Backward MR	rs780093	2	27742603	M-VLDL-triglycerides
Backward MR	rs780094	2	27741237	M-VLDL-triglycerides
Backward MR	rs1260326	2	27730940	S-VLDL-triglycerides
Backward MR	rs1260333	2	27748624	S-VLDL-triglycerides
Backward MR	rs780093	2	27742603	S-VLDL-triglycerides
Backward MR	rs780094	2	27741237	S-VLDL-triglycerides
Backward MR	rs1260326	2	27730940	XS-VLDL-triglycerides
Backward MR	rs1260333	2	27748624	XS-VLDL-triglycerides
Backward MR	rs780093	2	27742603	XS-VLDL-triglycerides
Backward MR	rs780094	2	27741237	XS-VLDL-triglycerides
Backward MR	rs1260326	2	27730940	XS-LDL-cholesterol
Backward MR	rs102275	11	61557803	HDL-cholesterol
Backward MR	rs1535	11	61597972	HDL-cholesterol
Backward MR	rs174535	11	61551356	HDL-cholesterol
Backward MR	rs174536	11	61551927	HDL-cholesterol
Backward MR	rs174537	11	61552680	HDL-cholesterol
Backward MR	rs174541	11	61565908	HDL-cholesterol
Backward MR	rs174545	11	61569306	HDL-cholesterol
Backward MR	rs174546	11	61569830	HDL-cholesterol
Backward MR	rs174547	11	61570783	HDL-cholesterol
Backward MR	rs174548	11	61571348	HDL-cholesterol
Backward MR	rs174549	11	61571382	HDL-cholesterol
Backward MR	rs174550	11	61571478	HDL-cholesterol
Backward MR	rs174555	11	61579760	HDL-cholesterol
Backward MR	rs174556	11	61580635	HDL-cholesterol
Backward MR	rs174576	11	61603510	HDL-cholesterol
Backward MR	rs174577	11	61604814	HDL-cholesterol
Backward MR	rs174583	11	61609750	HDL-cholesterol
Backward MR	rs2072114	11	61605215	HDL-cholesterol
Backward MR	rs2524299	11	61604782	HDL-cholesterol
Backward MR	rs2727270	11	61603237	HDL-cholesterol
Backward MR	rs2727271	11	61603358	HDL-cholesterol
Backward MR	rs4246215	11	61564299	HDL-cholesterol
Backward MR	rs102275	11	61557803	XL-HDL-cholesterol
Backward MR	rs1535	11	61597972	XL-HDL-cholesterol
Backward MR	rs174535	11	61551356	XL-HDL-cholesterol
Backward MR	rs174536	11	61551927	XL-HDL-cholesterol
Backward MR	rs174537	11	61552680	XL-HDL-cholesterol
Backward MR	rs174541	11	61565908	XL-HDL-cholesterol
Backward MR	rs174545	11	61569306	XL-HDL-cholesterol
Backward MR	rs174546	11	61569830	XL-HDL-cholesterol
Backward MR	rs174547	11	61570783	XL-HDL-cholesterol
Backward MR	rs174548	11	61571348	XL-HDL-cholesterol
Backward MR	rs174549	11	61571382	XL-HDL-cholesterol
Backward MR	rs174550	11	61571478	XL-HDL-cholesterol
Backward MR	rs174555	11	61579760	XL-HDL-cholesterol
Backward MR	rs174556	11	61580635	XL-HDL-cholesterol
Backward MR	rs174576	11	61603510	XL-HDL-cholesterol
Backward MR	rs174577	11	61604814	XL-HDL-cholesterol
Backward MR	rs174583	11	61609750	XL-HDL-cholesterol
Backward MR	rs2072114	11	61605215	XL-HDL-cholesterol
Backward MR	rs2524299	11	61604782	XL-HDL-cholesterol
Backward MR	rs2727270	11	61603237	XL-HDL-cholesterol
Backward MR	rs2727271	11	61603358	XL-HDL-cholesterol
Backward MR	rs4246215	11	61564299	XL-HDL-cholesterol
Backward MR	rs102275	11	61557803	XL-HDL-free cholesterol
Backward MR	rs1535	11	61597972	XL-HDL-free cholesterol
Backward MR	rs174535	11	61551356	XL-HDL-free cholesterol
Backward MR	rs174536	11	61551927	XL-HDL-free cholesterol
Backward MR	rs174537	11	61552680	XL-HDL-free cholesterol
Backward MR	rs174541	11	61565908	XL-HDL-free cholesterol
Backward MR	rs174545	11	61569306	XL-HDL-free cholesterol
Backward MR	rs174546	11	61569830	XL-HDL-free cholesterol
Backward MR	rs174547	11	61570783	XL-HDL-free cholesterol
Backward MR	rs174548	11	61571348	XL-HDL-free cholesterol
Backward MR	rs174549	11	61571382	XL-HDL-free cholesterol
Backward MR	rs174550	11	61571478	XL-HDL-free cholesterol
Backward MR	rs174555	11	61579760	XL-HDL-free cholesterol
Backward MR	rs174556	11	61580635	XL-HDL-free cholesterol
Backward MR	rs174576	11	61603510	XL-HDL-free cholesterol
Backward MR	rs174577	11	61604814	XL-HDL-free cholesterol
Backward MR	rs174583	11	61609750	XL-HDL-free cholesterol
Backward MR	rs2072114	11	61605215	XL-HDL-free cholesterol
Backward MR	rs2524299	11	61604782	XL-HDL-free cholesterol
Backward MR	rs2727270	11	61603237	XL-HDL-free cholesterol
Backward MR	rs2727271	11	61603358	XL-HDL-free cholesterol
Backward MR	rs4246215	11	61564299	XL-HDL-free cholesterol
Backward MR	rs102275	11	61557803	XL-HDL-phospholipids
Backward MR	rs1535	11	61597972	XL-HDL-phospholipids
Backward MR	rs174535	11	61551356	XL-HDL-phospholipids
Backward MR	rs174536	11	61551927	XL-HDL-phospholipids
Backward MR	rs174537	11	61552680	XL-HDL-phospholipids
Backward MR	rs174541	11	61565908	XL-HDL-phospholipids
Backward MR	rs174545	11	61569306	XL-HDL-phospholipids
Backward MR	rs174546	11	61569830	XL-HDL-phospholipids
Backward MR	rs174547	11	61570783	XL-HDL-phospholipids
Backward MR	rs174548	11	61571348	XL-HDL-phospholipids
Backward MR	rs174549	11	61571382	XL-HDL-phospholipids
Backward MR	rs174550	11	61571478	XL-HDL-phospholipids
Backward MR	rs174555	11	61579760	XL-HDL-phospholipids
Backward MR	rs174556	11	61580635	XL-HDL-phospholipids
Backward MR	rs174576	11	61603510	XL-HDL-phospholipids
Backward MR	rs174577	11	61604814	XL-HDL-phospholipids
Backward MR	rs174583	11	61609750	XL-HDL-phospholipids
Backward MR	rs2072114	11	61605215	XL-HDL-phospholipids
Backward MR	rs2524299	11	61604782	XL-HDL-phospholipids
Backward MR	rs2727270	11	61603237	XL-HDL-phospholipids
Backward MR	rs2727271	11	61603358	XL-HDL-phospholipids
Backward MR	rs4246215	11	61564299	XL-HDL-phospholipids
Backward MR	rs102275	11	61557803	L-HDL-cholesterol
Backward MR	rs1535	11	61597972	L-HDL-cholesterol
Backward MR	rs174535	11	61551356	L-HDL-cholesterol
Backward MR	rs174536	11	61551927	L-HDL-cholesterol
Backward MR	rs174537	11	61552680	L-HDL-cholesterol
Backward MR	rs174541	11	61565908	L-HDL-cholesterol
Backward MR	rs174545	11	61569306	L-HDL-cholesterol
Backward MR	rs174546	11	61569830	L-HDL-cholesterol
Backward MR	rs174547	11	61570783	L-HDL-cholesterol
Backward MR	rs174548	11	61571348	L-HDL-cholesterol
Backward MR	rs174549	11	61571382	L-HDL-cholesterol
Backward MR	rs174550	11	61571478	L-HDL-cholesterol
Backward MR	rs174555	11	61579760	L-HDL-cholesterol
Backward MR	rs174556	11	61580635	L-HDL-cholesterol
Backward MR	rs174576	11	61603510	L-HDL-cholesterol
Backward MR	rs174577	11	61604814	L-HDL-cholesterol
Backward MR	rs174583	11	61609750	L-HDL-cholesterol
Backward MR	rs2072114	11	61605215	L-HDL-cholesterol
Backward MR	rs2524299	11	61604782	L-HDL-cholesterol
Backward MR	rs2727270	11	61603237	L-HDL-cholesterol
Backward MR	rs2727271	11	61603358	L-HDL-cholesterol
Backward MR	rs4246215	11	61564299	L-HDL-cholesterol
Backward MR	rs102275	11	61557803	L-HDL-free cholesterol
Backward MR	rs1535	11	61597972	L-HDL-free cholesterol
Backward MR	rs174535	11	61551356	L-HDL-free cholesterol
Backward MR	rs174536	11	61551927	L-HDL-free cholesterol
Backward MR	rs174537	11	61552680	L-HDL-free cholesterol
Backward MR	rs174541	11	61565908	L-HDL-free cholesterol
Backward MR	rs174545	11	61569306	L-HDL-free cholesterol
Backward MR	rs174546	11	61569830	L-HDL-free cholesterol
Backward MR	rs174547	11	61570783	L-HDL-free cholesterol
Backward MR	rs174548	11	61571348	L-HDL-free cholesterol
Backward MR	rs174549	11	61571382	L-HDL-free cholesterol
Backward MR	rs174550	11	61571478	L-HDL-free cholesterol
Backward MR	rs174555	11	61579760	L-HDL-free cholesterol
Backward MR	rs174556	11	61580635	L-HDL-free cholesterol
Backward MR	rs174576	11	61603510	L-HDL-free cholesterol
Backward MR	rs174577	11	61604814	L-HDL-free cholesterol
Backward MR	rs174583	11	61609750	L-HDL-free cholesterol
Backward MR	rs2072114	11	61605215	L-HDL-free cholesterol
Backward MR	rs2524299	11	61604782	L-HDL-free cholesterol
Backward MR	rs2727270	11	61603237	L-HDL-free cholesterol
Backward MR	rs2727271	11	61603358	L-HDL-free cholesterol
Backward MR	rs4246215	11	61564299	L-HDL-free cholesterol
Backward MR	rs1260326	2	27730940	S-HDL-triglycerides
Backward MR	rs1260333	2	27748624	S-HDL-triglycerides
Backward MR	rs780093	2	27742603	S-HDL-triglycerides
Backward MR	rs780094	2	27741237	S-HDL-triglycerides
BMI: body mass index
WHR: waist-to-hip ratio
T2DM: type 2 diabetes

## Sheet: Suppl_t_2
Supplemental table 2. SNPs that are excluded from the genetic risk score because of disproportionate weights in the genetic risk score, as detected by the gtx function
Outcome	Exposure	SNP	Chromosome	Position	R2 (%) in exposure
Fasting glucose	XS-VLDL-triglycerides	rs4622454	15	58646332	0.198434
Fasting glucose	XS-VLDL-triglycerides	rs10468017	15	58678512	0.341342
T2DM	IDL-triglycerides	rs9302635	16	72144174	0.172827
T2DM	S-HDL-triglycerides	rs6511720	19	11202306	0.158547
T2DM	L-LDL-free cholesterol	rs2738446	19	11227326	0.157227
T2DM	M-VLDL-triglycerides	rs17489539	8	19873582	0.202199
T2DM	S-HDL-triglycerides	rs508487	11	117075566	0.187674
T2DM	S-VLDL-triglycerides	rs508487	11	117075566	0.188205
Lysophosphatidylcholine 16:0	Fasting glucose	rs780093	2	27742603	0.0400332
Lysophosphatidylcholine 17:0	Fasting glucose	rs12805422	11	45839889	0.027813
Lysophosphatidylcholine 18:0	Fasting glucose	rs2524299	11	61604782	0.0261766
Lysophosphatidylcholine 18:0	Fasting glucose	rs780093	2	27742603	0.0400332
Lysophosphatidylcholine 14:0	Fasting glucose	rs780093	2	27742603	0.0400332
Phosphatidylcholine diacyl 34:4	Fasting glucose	rs12805422	11	45839889	0.027813
Phosphatidylcholine diacyl 34:4	Fasting glucose	rs780093	2	27742603	0.0400332
Phosphatidylcholine diacyl 38:3	Fasting glucose	rs780093	2	27742603	0.0400332
Phosphatidylcholine diacyl 38:4	Fasting glucose	rs12805422	11	45839889	0.027813
Phosphatidylcholine diacyl 38:4	T2DM	rs243018	2	60586707	0.0316372
Phosphatidylcholine diacyl 40:4	Fasting glucose	rs853770	2	169749841	0.0421445
Phosphatidylcholine diacyl 40:4	Fasting glucose	rs6709087	2	169799010	0.123354
Phosphatidylcholine diacyl 40:4	Fasting glucose	rs780093	2	27742603	0.0400332
Phosphatidylcholine diacyl 32:1	Fasting glucose	rs780093	2	27742603	0.0400332
Phosphatidylcholine diacyl 34:4	T2DM	rs4719433	7	15065003	0.0383784
Phosphatidylcholine diacyl 34:4	T2DM	rs6813195	4	153520475	0.0313621
Phosphatidylcholine diacyl 38:3	Fasting glucose	rs780093	2	27742603	0.0400332
Phosphatidylcholine diacyl 38:4	T2DM	rs10842993	12	27964648	0.0321092
Phosphatidylcholine diacyl 42:0	Fasting glucose	rs853770	2	169749841	0.0421445
Phosphatidylethanolamine 32:2	Fasting glucose	rs2524299	11	61604782	0.0261766
Phosphatidylcholine alkyl-acyl 36:2	Fasting glucose	rs853770	2	169749841	0.0421445
Phosphatidylcholine alkyl-acyl 40:3	Fasting glucose	rs853770	2	169749841	0.0421445
Phosphatidylcholine alkyl-acyl 42:3	Fasting glucose	rs853770	2	169749841	0.0421445
Phosphatidylcholine alkyl-acyl 42:3	T2DM	rs896854	8	95960511	0.0347538
Phosphatidylcholine alkyl-acyl 42:4	Fasting glucose	rs853770	2	169749841	0.0421445
Phosphatidylcholine alkyl-acyl 42:5	Fasting glucose	rs560887	2	169763148	0.252022
Phosphatidylcholine alkyl-acyl 44:5	Fasting glucose	rs6709087	2	169799010	0.123354
Phosphatidylcholine alkyl-acyl 44:5	T2DM	rs243018	2	60586707	0.0316372
Phosphatidylcholine alkyl-acyl 34:1	Fasting glucose	rs2524299	11	61604782	0.0261766
Phosphatidylcholine alkyl-acyl 34:1	Fasting glucose	rs780093	2	27742603	0.0400332
Phosphatidylcholine alkyl-acyl 34:3	Fasting glucose	rs2524299	11	61604782	0.0261766
Phosphatidylcholine alkyl-acyl 36:2	Fasting glucose	rs780093	2	27742603	0.0400332
Phosphatidylcholine alkyl-acyl 36:3	Fasting glucose	rs780093	2	27742603	0.0400332
Alanine	T2DM	rs4237150	9	4290085	0.0281865
Tyrosine	Fasting glucose	rs11717195	3	123082398	0.0279066
Tyrosine	Fasting glucose	rs10787312	10	113023966	0.0346173
Tyrosine	T2DM	rs243018	2	60586707	0.0316372
Tyrosine	T2DM	rs4237150	9	4290085	0.0281865
Valine	Fasting glucose	rs780093	2	27742603	0.0400332
Valine	T2DM	rs4237150	9	4290085	0.0281865
Glycerol	Fasting glucose	rs780093	2	27742603	0.0400332
Triglycerides 46:0	Fasting glucose	rs780093	2	27742603	0.0400332
Triglycerides 46:0	T2DM	rs12571751	10	80942631	0.038775
Triglycerides 46:0	T2DM	rs2261181	12	66212318	0.0275355
Triglycerides 46:1	Fasting glucose	rs780093	2	27742603	0.0400332
Triglycerides 46:1	T2DM	rs1495130	3	23241009	0.0382697
Triglycerides 48:0	Fasting glucose	rs780093	2	27742603	0.0400332
Triglycerides 48:0	T2DM	rs12571751	10	80942631	0.038775
Triglycerides 48:0	T2DM	rs2261181	12	66212318	0.0275355
Triglycerides 48:1	T2DM	rs12571751	10	80942631	0.038775
Triglycerides 48:2	T2DM	rs12571751	10	80942631	0.038775
Triglycerides 48:3	Fasting glucose	rs780093	2	27742603	0.0400332
Triglycerides 50:0	Fasting glucose	rs780093	2	27742603	0.0400332
Triglycerides 50:0	T2DM	rs12571751	10	80942631	0.038775
Triglycerides 50:0	T2DM	rs1495130	3	23241009	0.0382697
Triglycerides 50:1	T2DM	rs12571751	10	80942631	0.038775
Triglycerides 50:2	Fasting glucose	rs12805422	11	45839889	0.027813
Triglycerides 50:2	T2DM	rs12571751	10	80942631	0.038775
Triglycerides 50:3	T2DM	rs163184	11	2847069	0.0584806
Triglycerides 50:5	Fasting glucose	rs780093	2	27742603	0.0400332
Triglycerides 50:5	T2DM	rs10842993	12	27964648	0.0321092
Triglycerides 51:1	Fasting glucose	rs780093	2	27742603	0.0400332
Triglycerides 51:1	T2DM	rs12571751	10	80942631	0.038775
Triglycerides 52:1	Fasting glucose	rs780093	2	27742603	0.0400332
Triglycerides 52:1	T2DM	rs12571751	10	80942631	0.038775
Triglycerides 53:1	Fasting glucose	rs780093	2	27742603	0.0400332
Triglycerides 54:1	Fasting glucose	rs780093	2	27742603	0.0400332
Triglycerides 54:7	Fasting glucose	rs780093	2	27742603	0.0400332
Triglycerides 54:7	Fasting glucose	rs2524299	11	61604782	0.0261766
Triglycerides 54:7	T2DM	rs163184	11	2847069	0.0584806
VLDL-ApoB	Fasting glucose	rs780093	2	27742603	0.0400332
VLDL-free cholesterol	Fasting glucose	rs780093	2	27742603	0.0400332
VLDL-phospholipids	Fasting glucose	rs780093	2	27742603	0.0400332
VLDL-triglycerides	Fasting glucose	rs780093	2	27742603	0.0400332
XXL-VLDL-cholesterol	Fasting glucose	rs780093	2	27742603	0.0400332
XXL-VLDL-phospholipids	Fasting glucose	rs2524299	11	61604782	0.0261766
XXL-VLDL-triglycerides	Fasting glucose	rs2524299	11	61604782	0.0261766
XL-VLDL-cholesterol	Fasting glucose	rs780093	2	27742603	0.0400332
M-VLDL-triglycerides	Fasting glucose	rs2524299	11	61604782	0.0261766
S-VLDL-triglycerides	Fasting glucose	rs2524299	11	61604782	0.0261766
XS-VLDL-phospholipids	Fasting glucose	rs2524299	11	61604782	0.0261766
IDL-phospholipids	Fasting glucose	rs2524299	11	61604782	0.0261766
IDL-phospholipids	Fasting glucose	rs780093	2	27742603	0.0400332
IDL-triglycerides	Fasting glucose	rs2524299	11	61604782	0.0261766
IDL-triglycerides	Fasting glucose	rs780093	2	27742603	0.0400332
T2DM: type 2 diabetes.
R2 (%): the percentage of explained variance in the exposure by genetic risk score.

## Sheet: Suppl_t_3
Supplemental table 3. All 124 metabolites' correlation coefficients, p-values as well as the overlap with previous research
Platform	Metabolite	R for fasting glucose	P-value for fasting glucose	R for fasting insulin	P-value for fasting insulin	R for HOMA-IR	P-value forHOMA-IR	R for BMI	P-value for BMI	R for WHR	P-value in WHR	Beta for T2DM	P-value for T2DM	Previous research
LC-MS	Lysophosphatidylcholine 14:0	0.086041	2.47909e-05	0.112735	7.69513e-07	0.12138	1.03528e-07	0.085858	2.64144e-05	0.125101	8.13161e-10	0.364171	0.715731
Biocrates	Lysophosphatidylcholine 16:0	-0.166386	8.17816e-07	-0.138981	0.000372654	-0.160256	3.84007e-05	-0.197827	3.68569e-09	-0.148206	1.18995e-05	-3.50255	0.000460821
Biocrates	Lysophosphatidylcholine 17:0	-0.262876	1.69083e-15	-0.195321	4.41578e-07	-0.234973	8.79155e-10	-0.262791	1.72942e-15	-0.309249	2.03698e-21	-4.61736	3.88645e-06
Biocrates	Lysophosphatidylcholine 18:0	-0.159734	2.2599e-06	-0.142355	0.000265435	-0.157894	5.0211e-05	-0.155108	4.46851e-06	-0.154107	5.16547e-06	-4.59331	4.36279e-06
Biocrates	Lysophosphatidylcholine 18:1	-0.169978	4.71144e-07	-0.19036	8.96295e-07	-0.203388	1.41419e-07	-0.269808	2.75579e-16	-0.217461	7.67075e-11	-3.63281	0.000280347
ESI-MS	Lysophosphatidylcholine 22:0	0.206286	2.60927e-08	0.0842654	0.0278977	0.137806	0.000310041	0.0905374	0.016623	0.101583	0.0071453	-0.976604	0.328765	Ha et al. (P)
LC-MS	Lysophosphatidylcholine alkyl-acyl 16:1	-0.0938368	4.1459e-06	-0.144918	1.70406e-10	-0.149142	5.17435e-11	-0.088271	1.53782e-05	-0.106901	1.60789e-07	-4.56476	5.00076e-06
LC-MS	Phosphatidylcholine alkyl-acyl 34:1	-0.137555	1.20719e-11	-0.198868	9.53236e-19	-0.214537	1.24532e-21	-0.212321	3.20656e-26	-0.204808	2.1793e-24	-4.53222	5.83679e-06
LC-MS	Phosphatidylcholine alkyl-acyl 34:3	-0.102987	4.34364e-07	-0.21731	3.04052e-22	-0.227534	2.88095e-24	-0.181536	2.29169e-19	-0.236864	1.66622e-32	-5.08732	3.63168e-07
LC-MS	Phosphatidylcholine alkyl-acyl 36:2	-0.116606	9.96301e-09	-0.193072	1.0309e-17	-0.205673	6.29021e-20	-0.207727	4.03695e-25	-0.224129	4.04297e-29	-5.53028	3.19727e-08
Biocrates	Phosphatidylcholine alkyl-acyl 36:2	-0.145235	1.80938e-05	-0.134905	0.000555599	-0.153117	8.53092e-05	-0.178931	1.08661e-07	-0.257102	7.83777e-15	-3.75265	0.000174978
LC-MS	Phosphatidylcholine alkyl-acyl 36:3	-0.104801	2.74782e-07	-0.212862	2.51735e-21	-0.222541	3.4641e-23	-0.215737	5.16069e-27	-0.232012	3.8022e-31	-4.03676	5.41934e-05
Biocrates	Phosphatidylcholine alkyl-acyl 40:3	-0.156223	3.7986e-06	-0.15022	0.000116724	-0.168358	1.48471e-05	-0.176286	1.66237e-07	-0.200529	2.20956e-09	-4.22044	2.4383e-05
Biocrates	Phosphatidylcholine alkyl-acyl 42:3	-0.158381	2.76444e-06	-0.204504	1.17299e-07	-0.222759	6.86503e-09	-0.206215	7.33648e-10	-0.19614	5.05403e-09	-4.17361	2.99815e-05
Biocrates	Phosphatidylcholine alkyl-acyl 42:4	-0.165862	8.87279e-07	-0.165964	1.9757e-05	-0.191267	7.7618e-07	-0.224984	1.50145e-11	-0.216613	8.92704e-11	-3.0741	0.0021114
Biocrates	Phosphatidylcholine alkyl-acyl 42:5	-0.16909	5.34289e-07	-0.130256	0.000864298	-0.156261	6.02934e-05	-0.189899	1.58285e-08	-0.156092	3.87225e-06	-3.31228	0.000925376	Floegel et al. (N)
Biocrates	Phosphatidylcholine alkyl-acyl 44:3	-0.137311	5.09909e-05	-0.186376	1.50693e-06	-0.191108	7.93344e-07	-0.21516	1.20671e-10	-0.205383	8.63916e-10	-3.53132	0.000413491
Biocrates	Phosphatidylcholine alkyl-acyl 44:4	-0.150146	9.18686e-06	-0.116646	0.00292181	-0.141794	0.000284071	-0.180832	7.87646e-08	-0.149238	1.04311e-05	-3.29708	0.000976956	Floegel et al. (N)
LC-MS	Phosphatidylcholine alkyl-acyl 44:5	-0.130589	1.26563e-10	-0.149481	4.50954e-11	-0.167989	1.24042e-13	-0.172845	1.15291e-17	-0.129341	2.09791e-10	-3.14596	0.0016554
Biocrates	Phosphatidylcholine alkyl-acyl 44:5	-0.159584	2.31114e-06	-0.111504	0.00443832	-0.135761	0.000511375	-0.152336	6.65861e-06	-0.135533	6.39883e-05	-3.64494	0.000267459	Floegel et al. (N)
Biocrates	Phosphatidylcholine alkyl-acyl 44:6	-0.187814	2.34107e-08	-0.172328	9.30541e-06	-0.202357	1.64464e-07	-0.211449	2.64129e-10	-0.194999	6.3736e-09	-2.74149	0.00611603
ESI-MS	Phosphatidylcholine diacyl 32:1	0.155774	3.26142e-05	0.17193	6.05912e-06	0.199219	1.45476e-07	0.104212	0.00587985	0.136825	0.000282483	1.78382	0.074453	Floegel et al. (P)
LC-MS	Phosphatidylcholine diacyl 34:4	0.104051	3.36625e-07	0.108542	2.04076e-06	0.127664	2.27144e-08	0.122607	1.77962e-09	0.119165	5.20644e-09	0.857088	0.391396	Suhre et al. (N)
ESI-MS	Phosphatidylcholine diacyl 34:4	0.164316	1.07759e-05	0.143835	0.000157459	0.19043	4.94243e-07	0.178481	1.73513e-06	0.140854	0.000176345	1.65811	0.0972961	Suhre et al. (N)
ESI-MS	Phosphatidylcholine diacyl 36:1	0.15726	2.72834e-05	0.137464	0.000321143	0.169331	8.83317e-06	0.0851022	0.0247542	0.12887	0.000635318	1.74695	0.0806459	Floegel et al. (P)
LC-MS	Phosphatidylcholine diacyl 38:3	0.129109	2.0383e-10	0.24813	6.26088e-29	0.253697	3.66946e-30	0.262297	4.06993e-40	0.263444	2.13583e-40	2.14894	0.0316392	Floegel et al. (P)
ESI-MS	Phosphatidylcholine diacyl 38:3	0.168981	6.48073e-06	0.251656	1.68995e-11	0.280659	4.47933e-14	0.255852	3.7306e-12	0.23803	1.25184e-10	2.47971	0.013149	Floegel et al. (P)
LC-MS	Phosphatidylcholine diacyl 38:4	0.0986202	1.27957e-06	0.086921	0.000142267	0.108689	1.93972e-06	0.160527	2.06198e-15	0.158878	4.30736e-15	0.0760412	0.939386	Suhre et al. (P)
ESI-MS	Phosphatidylcholine diacyl 38:4	0.194081	1.83133e-07	0.159611	2.73555e-05	0.198109	1.6804e-07	0.232161	3.41298e-10	0.152357	5.00871e-05	1.51367	0.130109	Suhre et al. (P)
LC-MS	Phosphatidylcholine diacyl 40:4	0.0917063	7.24924e-06	0.105133	4.35652e-06	0.119111	1.93274e-07	0.125854	6.73775e-10	0.18307	1.42699e-19	1.05305	0.292316
ESI-MS	Phosphatidylcholine diacyl 40:6	0.167063	7.81263e-06	0.13882	0.000273476	0.164929	1.48036e-05	0.216136	5.62617e-09	0.167947	7.29487e-06	1.25668	0.208871
Biocrates	Phosphatidylcholine diacyl 42:0	-0.161973	1.61294e-06	-0.1352	0.000539998	-0.160471	3.74669e-05	-0.175626	1.85417e-07	-0.164109	1.16368e-06	-2.37976	0.0173239
ESI-MS	Phosphatidylethanolamine 32:2	0.161882	1.50596e-05	0.080529	0.035815	0.134881	0.000421685	0.0472707	0.212842	0.0770661	0.04187	1.30436	0.19211
ESI-MS	Phosphatidylethanolamine 38:4	0.157762	2.5677e-05	0.125587	0.00103234	0.160897	2.48078e-05	0.0996864	0.00844946	0.168102	7.37151e-06	2.79437	0.00520013
ESI-MS	Phosphatidylethanolamine 40:4	0.186649	5.58585e-07	0.165389	1.37866e-05	0.205402	5.68328e-08	0.0975854	0.0099513	0.179856	1.5381e-06	3.03192	0.00243002	Suhre et al. (P)
ESI-MS	Phosphatidylethanolamine alkyl-acyl 38:7	0.167602	7.5118e-06	0.0478611	0.21419	0.0903325	0.0190633	0.0539514	0.155525	0.047773	0.208667	-0.565352	0.571834
NMR-COMP	Alanine	0.183356	1.03758e-17	0.206411	9.97916e-18	0.221957	2.50779e-20	0.220124	4.04348e-25	0.173008	8.30654e-16	4.64668	3.37314e-06	Cheng et al. (P), Ferrannini et al. (P), Stancakova et al. (P), Wurtz et al. (P)
NMR-COMP	Isoleucine	0.119635	3.22775e-08	0.307811	2.23361e-39	0.297316	1.67372e-36	0.304716	1.20466e-48	0.295041	2.47501e-45	9.23043	2.69551e-20	Suhre et al. (P), Cheng et al. (P), Ferrannini et al. (P), Stancakova et al. (P), Shaham et al. (P), Wang et al. (P)
NMR-COMP	Leucine	0.11886	3.82458e-08	0.259063	1.13081e-27	0.256203	5.51973e-27	0.30115	1.48431e-47	0.274954	3.20821e-39	9.01705	1.9323e-19	Ha et al. (P), Cheng et al. (P), Ferrannini et al. (P), Stancakova et al. (P), Wurtz et al. (P), Fiehn et al. (P), Wang et al. (P)
NMR-COMP	Phenylalanine	0.133708	5.63156e-10	0.187876	7.42822e-15	0.195463	5.91737e-16	0.23408	2.21232e-28	0.243619	1.12677e-30	6.20696	5.40182e-10	Ha et al. (P), Floegel et al. (P), Cheng et al. (P), Drogan et al. (P), Shaham et al. (P), Wang et al. (P)
NMR-COMP	Tyrosine	0.186322	3.00733e-18	0.243646	1.8343e-24	0.260559	6.69557e-28	0.322867	3.44255e-55	0.240279	8.26166e-30	4.32113	1.55231e-05	Drogan et al. (P), Cheng et al. (P), Wurtz et al. (P), Wang et al. (P)
NMR-COMP	Valine	0.181125	2.67686e-17	0.328933	1.79137e-45	0.335923	1.88765e-47	0.361516	9.16933e-71	0.280833	5.59143e-41	9.19327	3.8106e-20	Cheng et al. (P), Ferrannini et al. (P), Stancakova et al. (P), Wurtz et al. (P), Bao et al. (P), Wang et al. (P)
Biocrates	Valine	0.139821	3.72131e-05	0.290301	1.44203e-14	0.303773	6.21799e-16	0.255842	1.08036e-14	0.176141	1.73121e-07	3.7179	0.000200886	Cheng et al. (P), Ferrannini et al. (P), Stancakova et al. (P), Wurtz et al. (P), Bao et al. (P), Wang et al. (P)
NMR-COMP	Glutamate	0.142187	4.42901e-11	0.30393	2.44553e-38	0.305595	1.14097e-38	0.323478	2.91053e-55	0.296668	7.69877e-46	2.95123	0.00316507	Ferrannini et al. (P), Bao et al. (P)
NMR-COMP	Alpha-ketoglutarate	0.19659	3.83655e-20	0.300634	1.71759e-37	0.312994	1.06308e-40	0.346353	4.27718e-64	0.284829	4.76072e-42	4.69253	2.69851e-06
NMR-COMP	Alpha-ketoisovalerate	0.203469	1.31941e-21	0.23131	4.30393e-22	0.254377	1.33874e-26	0.228583	4.635e-27	0.178171	1.06257e-16	7.72179	1.14707e-14
NMR-COMP	2-Hydroxybutyrate	0.232651	5.17461e-28	0.178047	2.12295e-13	0.215473	3.94104e-19	0.275868	1.79459e-39	0.219419	7.89746e-25	7.32134	2.45501e-13	Fiehn et al. (P)
NMR-COMP	3-Hydroxyisobutyrate	0.200605	5.98205e-21	0.214618	4.87853e-19	0.239719	1.48598e-23	0.194846	9.29286e-20	0.15555	5.92105e-13	5.98863	2.11611e-09
NMR-COMP	1.5-Anhydrosorbitol	0.135121	3.74723e-10	0.0632368	0.010035	0.092085	0.000175489	0.065481	0.00261219	0.0744878	0.000621268	8.91274	4.97885e-19	Suhre et al. (N)
NMR-COMP	Betaine	0.165708	1.1944e-14	0.026248	0.286021	0.0702442	0.00427762	0.111701	2.54067e-07	0.0727954	0.000828232	8.4678	2.50072e-17	Cheng et al. (P)
Biocrates	Hydroxypropionylcarnitine	-0.137619	5.15675e-05	0.0537489	0.173622	0.0265928	0.501289	-0.0250447	0.465407	0.0222505	0.51667	-5.63584	1.74211e-08
NMR-COMP	Citrate	0.104763	1.29812e-06	-0.0238588	0.33204	0.00053066	0.982818	-0.0192198	0.377793	-0.0506433	0.0201389	3.56667	0.000361541	Wurtz et al. (P)
NMR-COMP	Glycerol	0.185499	4.67395e-18	0.118241	1.34836e-06	0.150072	7.70821e-10	0.168196	5.39946e-15	0.12892	2.69669e-09	7.64274	2.12651e-14	Shaham et al. (N)
Biocrates	Hexose	0.479301	2.45274e-57	0.302043	9.41265e-16	0.401764	9.47393e-29	0.180707	7.90649e-08	0.144333	2.02142e-05	8.99617	2.33722e-19	Drogan et al. (P), Floegel et al. (P)
NMR-COMP	Lactate	0.170646	1.92885e-15	0.203808	2.76239e-17	0.2175	1.59774e-19	0.128258	3.12171e-09	0.170347	2.55829e-15	6.57295	4.93294e-11	Wurtz et al. (P)Bao et al. (N)
NMR-COMP	Pyruvate/Oxaloacetate	0.224905	3.05859e-26	0.262974	1.59626e-28	0.287637	3.58621e-34	0.219272	6.76857e-25	0.201768	3.963e-21	5.92998	3.02974e-09	Wurtz et al. (P)
NMR-COMP	Lipids (CH=CH*CH2CH2)	0.111544	2.78327e-07	0.257438	4.31569e-27	0.256383	8.6077e-27	0.273473	1.31307e-38	0.307194	3.77432e-49	3.78699	0.000152486
NMR-COMP	Lipids (CH2)	0.116681	7.39821e-08	0.281214	1.75203e-32	0.279244	6.34513e-32	0.282771	1.94759e-41	0.327123	2.48026e-56	4.3099	1.63327e-05
NMR-COMP	Lipids-CH2CO	0.12009	3.0589e-08	0.265707	7.05389e-29	0.266549	5.57478e-29	0.277873	6.36349e-40	0.308552	1.22973e-49	4.51052	6.4669e-06
NMR-COMP	Lipids-CH3	0.101629	2.81734e-06	0.245956	8.18992e-25	0.243431	3.06077e-24	0.251619	1.14738e-32	0.300558	4.47499e-47	3.95923	7.51914e-05
LC-MS	Triglycerides 46:0	0.110603	1.11543e-07	0.24708	2.24529e-27	0.248364	1.41917e-27	0.17158	1.0928e-16	0.215735	7.74985e-26	3.24366	0.00118006
LC-MS	Triglycerides 46:1	0.108986	1.17832e-07	0.244094	2.13131e-27	0.250809	7.66803e-29	0.167312	2.65365e-16	0.225142	8.26506e-29	3.41208	0.000644689	Rhee et al. (P)
LC-MS	Triglycerides 46:2	0.112762	3.89407e-08	0.233417	3.72741e-25	0.239879	1.72818e-26	0.15962	5.28131e-15	0.216314	9.76171e-27	2.69111	0.00712139
LC-MS	Triglycerides 48:0	0.117324	1.76389e-08	0.285054	1.03914e-36	0.282917	4.58231e-36	0.206702	8.02127e-24	0.251134	5.01385e-35	4.23312	2.30473e-05	Rhee et al. (P)
LC-MS	Triglycerides 48:1	0.111956	4.59591e-08	0.277496	7.11664e-36	0.27687	1.28735e-35	0.221534	3.48763e-28	0.275146	1.21946e-43	3.8333	0.000126434	Rhee et al. (P)
LC-MS	Triglycerides 48:2	0.11023	7.08874e-08	0.23537	8.60007e-26	0.2368	4.8727e-26	0.205845	1.82763e-24	0.254437	2.95994e-37	2.59965	0.00933179
LC-MS	Triglycerides 48:3	0.08875	1.47622e-05	0.208927	1.93717e-20	0.211122	8.346e-21	0.191827	2.28342e-21	0.235018	9.08368e-32	2.4383	0.0147564
LC-MS	Triglycerides 50:0	0.100569	9.62862e-07	0.25884	4.91208e-31	0.254963	5.0215e-30	0.205963	2.24361e-24	0.255224	2.62113e-37	4.09392	4.24147e-05	Rhee et al. (P)
LC-MS	Triglycerides 50:1	0.0985775	1.36795e-06	0.273522	4.00103e-35	0.266652	2.95536e-33	0.23464	6.77953e-32	0.302038	1.37261e-53	4.13072	3.61624e-05	Kotronen et al. (P)
LC-MS	Triglycerides 50:2	0.0885738	1.44887e-05	0.242731	1.42431e-27	0.237924	1.98154e-26	0.231252	5.41971e-31	0.295405	3.81688e-51	3.55284	0.000381096
LC-MS	Triglycerides 50:3	0.0836182	4.42292e-05	0.206882	4.38013e-20	0.205203	1.00478e-19	0.220903	3.41084e-28	0.265616	8.05662e-41	2.98561	0.0028301
LC-MS	Triglycerides 50:4	0.0857593	2.74122e-05	0.196106	3.70625e-18	0.198178	1.76589e-18	0.211059	7.99871e-26	0.246511	4.05982e-35	3.1232	0.00178894
LC-MS	Triglycerides 50:5	0.0890884	1.35138e-05	0.193241	1.29373e-17	0.198224	1.9221e-18	0.19543	3.57227e-22	0.221939	2.23794e-28	3.48904	0.000484764
LC-MS	Triglycerides 51:1	0.0909244	9.26794e-06	0.266144	6.07144e-33	0.263232	4.09169e-32	0.215894	7.9226e-27	0.242738	8.05797e-34	3.19519	0.00139739
LC-MS	Triglycerides 52:1	0.101552	7.0096e-07	0.279742	1.37607e-36	0.272166	1.73304e-34	0.242248	8.3369e-34	0.312884	1.97656e-57	4.77889	1.76265e-06	Rhee et al. (P), Kotronen et al. (P)
LC-MS	Triglycerides 52:6	0.0867366	2.23191e-05	0.185965	2.0814e-16	0.18896	7.21802e-17	0.229392	2.00809e-30	0.247357	2.46858e-35	3.87376	0.000107168
LC-MS	Triglycerides 53:1	0.0917208	8.78268e-06	0.23817	5.37276e-26	0.234724	3.4247e-25	0.190502	8.5196e-21	0.212939	9.32827e-26	2.73017	0.00633021
LC-MS	Triglycerides 54:1	0.10279	5.19291e-07	0.243057	1.81221e-27	0.241277	5.32266e-27	0.193241	1.25058e-21	0.261072	3.08066e-39	3.66723	0.000245188
LC-MS	Triglycerides 54:7	0.0911063	8.36218e-06	0.181898	9.30833e-16	0.185856	2.29127e-16	0.209211	2.31221e-25	0.241806	9.49589e-34	3.8976	9.71516e-05
LC-MS	Triglycerides 56:8	0.0832695	4.65723e-05	0.170631	5.21374e-14	0.171001	4.94932e-14	0.216498	3.69522e-27	0.239969	2.83306e-33	3.59603	0.000323116
NMR-LIPO	Plasma-triglycerides	0.0957647	4.28956e-06	0.266455	5.72232e-32	0.263024	4.69034e-31	0.254048	4.87183e-36	0.313939	5.78447e-56	4.24474	2.18843e-05
NMR-LIPO	VLDL-ApoB	0.13067	2.84196e-10	0.219341	9.18564e-22	0.230842	5.41682e-24	0.211867	3.74617e-25	0.296703	9.07978e-50	5.02057	5.15178e-07
NMR-LIPO	VLDL-cholesterol	0.0908588	1.28204e-05	0.230496	6.02291e-24	0.230734	6.20667e-24	0.206767	5.91713e-24	0.265109	2.63024e-39	2.57285	0.0100864
NMR-LIPO	VLDL-free cholesterol	0.1255	1.41704e-09	0.241121	3.19469e-26	0.247855	1.23921e-27	0.236862	2.25442e-31	0.30419	1.80253e-52	4.90767	9.21665e-07
NMR-LIPO	VLDL-phospholipids	0.119837	7.58013e-09	0.245557	3.41445e-27	0.251142	2.25278e-28	0.233968	1.26903e-30	0.305332	6.50178e-53	4.14877	3.34268e-05
NMR-LIPO	VLDL-triglycerides	0.130971	2.77448e-10	0.282292	5.87403e-36	0.285783	8.6747e-37	0.25271	1.22485e-35	0.311473	5.29731e-55	4.61796	3.87525e-06
NMR-LIPO	XXL-VLDL-cholesterol	0.119194	9.90815e-09	0.272612	1.90974e-33	0.275134	5.39537e-34	0.249959	7.95653e-35	0.281323	2.5668e-44	3.45409	0.000552154
NMR-LIPO	XXL-VLDL-free cholesterol	0.107374	2.45133e-07	0.264198	1.95141e-31	0.262456	6.18431e-31	0.2527	1.1509e-35	0.300161	7.09849e-51	3.5802	0.000343333
NMR-LIPO	XXL-VLDL-phospholipids	0.0999291	1.61378e-06	0.272771	1.67197e-33	0.267993	3.14896e-32	0.267297	5.83833e-40	0.310593	1.20074e-54	3.1282	0.00175881
NMR-LIPO	XXL-VLDL-triglycerides	0.103699	6.44823e-07	0.28408	2.06414e-36	0.279778	3.46082e-35	0.291467	8.20802e-48	0.334106	6.16641e-64	3.33948	0.000839357
NMR-LIPO	XL-VLDL-cholesterol	0.098952	1.92947e-06	0.19981	3.40033e-18	0.205166	4.33108e-19	0.19138	1.13496e-20	0.261064	3.64204e-38	3.6836	0.000229965
NMR-LIPO	M-VLDL-triglycerides	0.0933448	7.14103e-06	0.138447	2.4892e-09	0.149424	1.22336e-10	0.141728	7.5461e-12	0.239434	4.92e-32	5.05466	4.31162e-07
NMR-LIPO	S-VLDL-triglycerides	0.113448	4.43606e-08	0.190841	1.03388e-16	0.198291	6.35208e-18	0.237402	1.3121e-31	0.308645	2.77003e-54	3.21706	0.00129512
NMR-LIPO	XS-VLDL-cholesterol	0.111027	8.58896e-08	0.149844	9.7418e-11	0.161	3.51401e-12	0.167219	4.73332e-16	0.236151	3.28019e-31	2.96293	0.00304728
NMR-LIPO	XS-VLDL-phospholipids	0.11249	5.80982e-08	0.128133	3.49176e-08	0.140781	1.34977e-09	0.171052	9.73602e-17	0.224526	3.27455e-28	3.84807	0.000119053
NMR-LIPO	XS-VLDL-triglycerides	0.233051	1.6498e-30	0.112311	1.40339e-06	0.157563	1.03702e-11	0.158816	1.40384e-14	0.165179	1.20405e-15	9.25275	2.18784e-20
NMR-LIPO	IDL-phospholipids	0.0995961	1.60066e-06	0.181235	3.52978e-15	0.188907	2.31431e-16	0.216653	2.29023e-26	0.277055	2.95752e-43	3.73935	0.000184494
NMR-LIPO	IDL-triglycerides	0.11431	3.89685e-08	0.239802	7.86902e-26	0.241438	4.09342e-26	0.24837	2.15717e-34	0.297122	9.98021e-50	4.09511	4.21972e-05
NMR-LIPO	LDL-triglycerides	0.0878949	2.35793e-05	0.150996	7.03147e-11	0.159164	6.32388e-12	0.158111	1.82151e-14	0.215869	4.19016e-26	5.60396	2.09508e-08
NMR-LIPO	XL-LDL-ApoB	-0.101501	9.98104e-07	-0.218852	9.55205e-22	-0.224642	7.96442e-23	-0.171738	6.95903e-17	-0.209067	1.51223e-24	-6.29057	3.16295e-10
NMR-LIPO	XL-LDL-cholesterol	-0.106624	2.72229e-07	-0.213358	1.06416e-20	-0.220864	4.41641e-22	-0.176221	1.01207e-17	-0.219093	6.54366e-27	-6.87005	6.41797e-12
NMR-LIPO	XL-LDL-free cholesterol	-0.114674	3.11391e-08	-0.218676	1.03322e-21	-0.227674	1.96336e-23	-0.18392	3.24959e-19	-0.230678	8.32655e-30	-6.98358	2.87748e-12
NMR-LIPO	XL-LDL-phospholipids	-0.0986991	1.98842e-06	-0.187777	3.21805e-16	-0.193389	4.2182e-17	-0.131697	2.01259e-10	-0.192433	6.72754e-21	-7.23493	4.65764e-13
NMR-LIPO	L-LDL-free cholesterol	-0.089317	1.70993e-05	-0.18284	1.94434e-15	-0.190312	1.33799e-16	-0.123254	2.72443e-09	-0.147356	1.0313e-12	-6.97158	3.13396e-12
NMR-LIPO	M-LDL-ApoB	0.0911388	1.14808e-05	0.0785487	0.000765215	0.0869915	0.00019587	0.125718	1.30426e-09	0.197896	4.68975e-22	3.38233	0.000718728
NMR-LIPO	M-LDL-triglycerides	0.111218	8.05287e-08	0.167128	4.43535e-13	0.175944	2.44087e-14	0.177605	5.52098e-18	0.242055	7.95604e-33	6.14928	7.78363e-10
NMR-LIPO	S-LDL-ApoB	0.163043	2.43859e-15	0.240351	4.27087e-26	0.250202	3.32517e-28	0.255033	1.66072e-36	0.322795	9.98658e-60	6.16051	7.25108e-10
NMR-LIPO	S-LDL-cholesterol	0.162283	3.35158e-15	0.243389	9.61593e-27	0.2515	1.745e-28	0.272534	8.03193e-42	0.331602	2.68176e-63	5.56423	2.63306e-08
NMR-LIPO	S-LDL-free cholesterol	0.156242	3.55349e-14	0.209731	5.64252e-20	0.218858	1.22842e-21	0.248965	9.52459e-35	0.318339	6.17807e-58	4.97438	6.54569e-07
NMR-LIPO	S-LDL-phospholipids	0.169057	2.14696e-16	0.245587	3.15047e-27	0.255209	2.45083e-29	0.270986	2.58323e-41	0.334999	1.07206e-64	5.81748	5.97418e-09
NMR-LIPO	S-LDL-triglycerides	0.142757	5.06677e-12	0.20255	1.10481e-18	0.211701	2.75113e-20	0.196319	1.06263e-21	0.280387	3.24627e-44	7.84883	4.19925e-15
NMR-LIPO	XS-LDL-cholesterol	0.0848274	4.51631e-05	0.0932089	6.4122e-05	0.102896	1.03045e-05	0.104131	5.43348e-07	0.132142	1.85956e-10	3.935	8.3196e-05
NMR-LIPO	XS-LDL-phospholipids	0.0962244	3.68854e-06	0.0898981	0.000117744	0.100831	1.5767e-05	0.0744471	0.000357828	0.122887	3.34142e-09	4.49606	6.92233e-06
NMR-LIPO	XS-LDL-triglycerides	0.103322	6.58788e-07	0.156113	1.57472e-11	0.16316	1.87382e-12	0.12742	8.13329e-10	0.199686	2.1814e-22	6.33695	2.34353e-10
NMR-LIPO	HDL-cholesterol	-0.101314	1.06241e-06	-0.259527	1.78089e-30	-0.257577	6.16757e-30	-0.230752	7.53187e-30	-0.28135	1.2596e-44	-4.72106	2.34617e-06
NMR-LIPO	HDL-free cholesterol	-0.127497	7.17442e-10	-0.249721	3.26707e-28	-0.255084	2.27694e-29	-0.249971	4.3176e-35	-0.302567	4.71903e-52	-6.23799	4.43242e-10
NMR-LIPO	HDL-phospholipids	-0.0909029	1.21534e-05	-0.207542	1.32165e-19	-0.206486	2.29705e-19	-0.212701	2.02612e-25	-0.238656	7.04466e-32	-3.63315	0.000279984
NMR-LIPO	XL-HDL-cholesterol	-0.093652	7.00517e-06	-0.24534	4.33892e-27	-0.24244	2.19331e-26	-0.203011	4.54979e-23	-0.244596	2.49211e-33	-3.02139	0.00251616
NMR-LIPO	XL-HDL-free cholesterol	-0.135264	6.82727e-11	-0.265531	8.90726e-32	-0.269756	9.88e-33	-0.320343	1.33506e-58	-0.323538	8.52629e-60	-4.50901	6.51309e-06
NMR-LIPO	XL-HDL-phospholipids	-0.132201	1.79189e-10	-0.258525	3.68931e-30	-0.261013	1.13682e-30	-0.284894	9.87657e-46	-0.300032	5.57935e-51	-3.52838	0.000418116
NMR-LIPO	L-HDL-cholesterol	-0.101627	9.7265e-07	-0.204199	5.16256e-19	-0.20711	1.73329e-19	-0.190855	1.29957e-20	-0.241452	1.19928e-32	-4.98342	6.24699e-07
NMR-LIPO	L-HDL-free cholesterol	-0.130635	2.65317e-10	-0.210653	3.39598e-20	-0.218427	1.3097e-21	-0.220388	2.78766e-27	-0.270532	3.44932e-41	-6.78696	1.14524e-11
NMR-LIPO	S-HDL-ApoA1	0.101234	1.0719e-06	-0.0182212	0.436376	0.00271147	0.907935	0.0805838	0.000108602	0.140056	1.3375e-11	2.8247	0.00473249
NMR-LIPO	S-HDL-triglycerides	0.0894015	1.69284e-05	0.249282	4.24806e-28	0.247902	1.02549e-27	0.231214	5.56134e-30	0.308739	2.55529e-54	5.09864	3.42099e-07
R: correlated coefficient.
HOMA-IR: Homeostatic model assessment insulin resistance; BMI: body mass index; WHR: waist-to-hip ratio; T2DM: type 2 diabetes.
ESI-MS: Electrospray Ionisation-Mass Spectrometry; LC-MS: Liquid Chromatography-Mass Spectrometry; NMR-COMP: Small Compound Nuclear Magnetic Resonance Spectroscopy; NMR-LIPO: Lipoprotein Nuclear Magnetic Resonance Spectroscopy.
(P): positive association; (N): negative association.
Drogan, D., et al. Untargeted metabolic profiling identifies altered serum metabolites of type 2 diabetes mellitus in a prospective, nested case control study. Clin Chem 61, 487-497 (2015).
Floegel, A., et al. Identification of serum metabolites associated with risk of type 2 diabetes using a targeted metabolomic approach. Diabetes 62, 639-648 (2013).
Suhre, K., et al. Metabolic footprint of diabetes: a multiplatform metabolomics study in an epidemiological setting. PLoS One 5, e13953 (2010).
Ha, C.Y., et al. The association of specific metabolites of lipid metabolism with markers of oxidative stress, inflammation and arterial stiffness in men with newly diagnosed type 2 diabetes. Clin Endocrinol (Oxf) 76, 674-682 (2012).
Rhee, E.P., et al. Lipid profiling identifies a triacylglycerol signature of insulin resistance and improves diabetes prediction in humans. J Clin Invest 121, 1402-1411 (2011).
Kotronen, A., et al. Serum saturated fatty acids containing triacylglycerols are better markers of insulin resistance than total serum triacylglycerol concentrations. Diabetologia 52, 684-690 (2009).
Cheng, S., et al. Metabolite profiling identifies pathways associated with metabolic risk in humans. Circulation 125, 2222-2231 (2012).
Ferrannini, E., et al. Early metabolic markers of the development of dysglycemia and type 2 diabetes and their physiological significance. Diabetes 62, 1730-1737 (2013).
Stancakova, A., et al. Hyperglycemia and a common variant of GCKR are associated with the levels of eight amino acids in 9,369 Finnish men. Diabetes 61, 1895-1902 (2012).
Wurtz, P., et al. Circulating metabolite predictors of glycemia in middle-aged men and women. Diabetes Care 35, 1749-1756 (2012).
Bao, Y., et al. Metabonomic variations in the drug-treated type 2 diabetes mellitus patients and healthy volunteers. J Proteome Res 8, 1623-1630 (2009).
Shaham, O., et al. Metabolic profiling of the human response to a glucose challenge reveals distinct axes of insulin sensitivity. Mol Syst Biol 4, 214 (2008).
Fiehn, O., et al. Plasma metabolomic profiles reflective of glucose homeostasis in non-diabetic and type 2 diabetic obese African-American women. PLoS One 5, e15234 (2010).
Wang, T.J., et al. Metabolite profiles and the risk of developing diabetes. Nat Med 17, 448-453 (2011).

## Sheet: Suppl_t_4
Supplemental table 4. Results of Mendelian randomization of metabolites on fasting glucose/T2DM (forward approach)
	Outcome: Fasting glucose					Outcome: Fasting glucose®					Outcome: T2DM					Outcome: T2DM®
Exposure	R2 (%)	SNPs (n)	Effect	P-value	FDR	R2 (%)	SNPs (n)	Effect	P-value	FDR	R2 (%)	SNPs (n)	Effect	P-value	FDR	R2 (%)	SNPs (n)	Effect	P-value	FDR
Phosphatidylcholine alkyl-acyl C44:5	2.38027	5	-0.00669943	0.928616	0.928616	1.96138	4	NP	NP	NP	2.38027	5	-0.0494659	0.50831	0.598012	1.96138	4	NP	NP	NP
Tyrosine	1.57528	6	-0.117513	0.0242969	0.0539931	1.27222	4	NP	NP	NP	1.74425	7	-0.0476066	0.335325	0.54499	1.27222	4	NP	NP	NP
Valine	1.38422	5	-0.0485975	0.366005	0.391572	1.24466	4	NP	NP	NP	1.38422	5	0.00304183	0.954878	0.954878	1.24466	4	NP	NP	NP
Lactate	4.62052	12	-0.0568165	0.165897	0.207371	3.51695	9	-0.0481364	0.292584	0.402304	4.70981	12	-0.0429603	0.289933	0.54499	3.60624	9	-0.0172784	0.702052	0.965321
Plasma-Triglycerides	3.93364	11	0.0667114	0.051437	0.076265	2.78286	7	0.103298	0.0111318	0.0408166	4.20998	12	0.084579	0.0106316	0.0667924	3.16299	8	0.117282	0.00212583	0.0467684
M-VLDL-triglycerides	3.45739	10	0.0640327	0.0817877	0.10905	2.64003	7	0.085272	0.0427277	0.0801435	3.48531	10	0.050138	0.17123	0.489229	2.75653	7	0.0517351	0.209047	0.670368
S-VLDL-triglycerides	4.79792	13	0.0605773	0.0525721	0.076265	3.92132	10	0.0830603	0.0153805	0.0415344	4.89431	13	0.0167371	0.588494	0.653882	4.01772	10	0.0427503	0.206772	0.670368
XS-VLDL-phospholipids	7.973	23	-0.0619588	0.0149164	0.0391861	6.29784	15	-0.0672125	0.0188793	0.0415344	8.01732	23	-0.0757419	0.0028431	0.028431	6.34216	15	-0.0577576	0.0428976	0.314582
XS-VLDL-triglycerides	5.21272	13	0.0280908	0.371993	0.391572	4.36675	10	0.0480373	0.162221	0.254919	6.07299	16	0.0350489	0.229327	0.54499	4.46402	10	0.0613393	0.0711564	0.39136
IDL-phospholipids	7.16249	26	-0.0623227	0.0146575	0.0391861	4.83779	15	-0.0506602	0.101104	0.171099	7.18051	26	-0.0928599	0.000271305	0.0054261	4.85581	15	-0.0707023	0.021883	0.240713
IDL-Triglycerides	7.18652	17	-0.0556464	0.0377402	0.0754805	6.0771	12	-0.0587177	0.0437147	0.0801435	7.21592	17	-0.0398226	0.136256	0.489229	6.27932	13	-0.0235997	0.409996	0.670368
L-LDL-Free cholesterol	6.07491	21	-0.053637	0.0533855	0.076265	3.68589	11	-0.041677	0.238988	0.350516	5.93279	20	-0.0695204	0.0133585	0.0667924	3.54377	10	-0.0336179	0.351648	0.670368
XS-LDL-cholesterol	4.79265	19	-0.0364251	0.243133	0.286039	2.96274	10	-0.0244987	0.535085	0.692464	4.79265	19	-0.0430712	0.167538	0.489229	2.96274	10	-0.00523753	0.894506	1
HDL-cholesterol	4.83521	10	-0.0744419	0.0156744	0.0391861	4.66884	9	-0.0747392	0.0171089	0.0415344	5.00748	11	-0.011909	0.69408	0.730611	4.84111	10	-0.013386	0.66373	0.965321
XL-HDL-cholesterol	4.25305	10	-0.0877073	0.00772477	0.0308991	4.25305	10	-0.0877073	0.00772477	0.033989	4.32051	10	-0.0274577	0.400621	0.54499	4.32051	10	-0.0274577	0.400621	0.670368
XL-HDL-Free cholesterol	6.48356	16	-0.0889866	0.000839909	0.00559939	6.48356	16	-0.0889866	0.000839909	0.00615933	6.56265	16	-0.0279361	0.291579	0.54499	6.56265	16	-0.0279361	0.291579	0.670368
XL-HDL-phospholipids	10.2123	22	-0.0841982	0.000172943	0.00276072	9.61298	19	-0.0891032	0.000114757	0.0017209	10.3368	22	-0.0199153	0.371504	0.54499	9.73756	19	-0.0211594	0.356631	0.670368
L-HDL-cholesterol	7.57565	17	-0.0785914	0.00141796	0.00708979	7.4135	16	-0.0789057	0.00152686	0.00839772	7.73416	18	-0.0202338	0.406534	0.54499	7.572	17	-0.0206637	0.401593	0.670368
L-HDL-Free cholesterol	7.57804	18	-0.0895822	0.000276072	0.00276072	7.26643	16	-0.0950861	0.000156445	0.0017209	7.7412	19	-0.0189864	0.435992	0.54499	7.42959	17	-0.0197768	0.426598	0.670368
S-HDL-triglycerides	3.97403	11	0.066647	0.0504684	0.076265	3.51501	9	0.0850732	0.018843	0.0415344	3.87581	10	0.0272802	0.429096	0.54499	3.41679	8	0.0387282	0.291773	0.670368
® Pathway based sensitivity analysis
T2DM: type 2 diabetes.
R2 (%): the percentage of explained variance in the exposure by genetic risk score.
FDR: false discovery rate.
NP: not performed.

## Sheet: Suppl_t_5
Supplemental table 5. SNP lists included in exposure genetic risk score in Mendelian randomization of metabolites on fasting glucose/T2DM (forward approach)
Exposure: Metabolite	Outcome	SNPs included in GRS	Chromosome	Position	Nearest gene	Effect allele	Non-effect allele	MAF	R2(%)	Standardized effect in exposure GWAS	Standardized effect in outcome GWAS (fasting glucose)	Standardized effect in Outcome GWAS (T2DM)	Involed gene in pathway	Confirmed by pathway
Phosphatidylcholine alkyl-acyl 44:5	Fasting glucose / T2DM	rs2227319	17	38170845	CSF3	A	G	0.3692	0.418889	-5.60784	-0.378378	0.994603	(NA)	No
Phosphatidylcholine alkyl-acyl 44:5	Fasting glucose / T2DM	rs3764261	16	56993324	HERPUD1(dist=15531), CETP(dist=2511)	A	C	0.3364	0.406988	5.52727	-1	0.666293	CETP	Yes
Phosphatidylcholine alkyl-acyl 44:5	Fasting glucose / T2DM	rs10184488	2	178303981	AGPS	C	T	0.1321	0.445763	-5.78571	0	0	AGPS	Yes
Phosphatidylcholine alkyl-acyl 44:5	Fasting glucose / T2DM	rs7582179	2	178370631	AGPS	A	G	0.1685	0.524153	-6.27632	-0.0612245	0.403626	AGPS	Yes
Phosphatidylcholine alkyl-acyl 44:5	Fasting glucose / T2DM	rs7700133	4	185773811	MIR3945(dist=1547), LOC100506229(dist=40343)	T	C	0.3052	0.584472	6.62963	0.275	-0.666293	ACSL1	Yes
Tyrosine	Fasting glucose / T2DM	rs4381653	17	20865013	CCDC144NL(dist=65560), USP22(dist=37893)	A	G	0.275222	0.135997	-5.55948	-0.292683	-0.666293	(NA)	No
Tyrosine	Fasting glucose / T2DM	rs1477386	16	71600477	TAT	C	G	0.352285	0.170675	-5.87943	1.53846	0.666293	TAT	Yes
Tyrosine	Fasting glucose / T2DM	rs7187638	16	71621858	TAT(dist=10860), MARVELD3(dist=38198)	G	A	0.064625	0.324302	8.11032	-0.690476	0.584755	TAT	Yes
Tyrosine	T2DM	rs12446333	16	71752157	PHLPP2(dist=3453), AP1G1(dist=10748)	C	T	0.172397	0.168966	-6.49431	NP	1.06404	TAT?	No
Tyrosine	Fasting glucose / T2DM	rs11642001	16	71899586	ZNF821	A	G	0.327176	0.167068	-6.45753	1.47727	0.666293	(NA)	No
Tyrosine	Fasting glucose / T2DM	rs14399	6	111543944	SLC16A10	A	C	0.389872	0.418918	-10.238	1	-0.666293	SLC16A10	Yes
Tyrosine	Fasting glucose / T2DM	rs10457237	6	111606126	KIAA1919(dist=15865), REV3L(dist=14108)	C	T	0.112455	0.358323	9.46653	-1.09615	-2.07424	SLC16A10	Yes
Valine	Fasting glucose / T2DM	rs2074216	17	7133609	DVL2	A	G	0.400104	0.139569	5.89891	0.795918	1.33896	SLC2A4? (glucose mediated)	No
Valine	Fasting glucose / T2DM	rs10211524	2	65208074	LOC400958(dist=48493), SLC1A4(dist=7505)	A	G	0.40991	0.336293	-9.16548	-0.425	0.666293	SLC1A4	Yes
Valine	Fasting glucose / T2DM	rs7655059	4	89149144	ABCG2	G	C	0.217667	0.150845	-6.13267	0.755102	0.50213	PPM1K	Yes
Valine	Fasting glucose / T2DM	rs9637599	4	89206230	PPM1K	C	A	0.46958	0.61802	-12.4429	0.789474	-0.666293	PPM1K	Yes
Valine	Fasting glucose / T2DM	rs2075290	11	116653296	ZNF259	C	T	0.075707	0.139497	-5.89702	1.85714	1.00902	APOA1, APOA4, APOA5, APOC3	Yes
Lactate	Fasting glucose / T2DM	rs6511720	19	11202306	LDLR	T	G	0.103588	0.41988	-7.55086	0.617647	2.07424	LDLR	Yes
Lactate	Fasting glucose / T2DM	rs4426495	2	21143982	C2orf43(dist=121155), APOB(dist=80319)	T	C	0.386333	0.229315	5.57529	-0.421053	0	APOB	Yes
Lactate	Fasting glucose / T2DM	rs6662286	1	55730327	MIR4422(dist=38931), PPAP2B(dist=1230092)	T	C	0.105635	0.252283	-5.8483	-0.261364	1.2222	PCSK9?	No
Lactate	Fasting glucose	rs3764261	16	56993324	HERPUD1(dist=15531), CETP(dist=2511)	A	C	0.283375	0.226957	5.54669	-1	NP	CETP	Yes
Lactate	T2DM	rs17231506	16	56994528	HERPUD1(dist=16735), CETP(dist=1307)	T	C	0.285944	0.236951	5.66757	NP	0	CETP	Yes
Lactate	Fasting glucose / T2DM	rs1532085	15	58683366	AQP9(dist=205256), LIPC(dist=40809)	A	G	0.416455	0.314631	6.53362	-2.89474	-1.99881	LIPC	Yes
Lactate	Fasting glucose / T2DM	rs17821298	15	58690738	AQP9(dist=212628), LIPC(dist=33437)	A	C	0.240949	0.228732	5.56777	-1.25	0	LIPC	Yes
Lactate	Fasting glucose / T2DM	rs1800588	15	58723675	LIPC	T	C	0.24922	0.586465	8.93172	-1.29787	0	LIPC	Yes
Lactate	Fasting glucose / T2DM	rs11208004	1	63145439	DOCK7	A	G	0.262859	0.369264	-7.0788	0.820513	0.666293	(NA)	No
Lactate	Fasting glucose / T2DM	rs4632781	5	74376658	ANKRD31	C	G	0.206775	0.238277	5.68344	-1.14286	-1.00902	HMGCR?	No
Lactate	Fasting glucose / T2DM	rs11216129	11	116620256	BUD13	A	C	0.165615	0.268057	-6.02928	-0.301887	0.666293	APOA1, APOA4, APOA5, APOC3	Yes
Lactate	Fasting glucose / T2DM	rs964184	11	116648917	ZNF259	G	C	0.143801	0.916946	11.1869	1.49057	2.01794	APOA1, APOA4, APOA5, APOC3	Yes
Lactate	T2DM	rs2070665	11	116707684	APOA1	A	G	0.11935	0.405264	7.41746	NP	0.228476	APOA1, APOA4, APOA5, APOC3	Yes
Lactate	Fasting glucose	rs6589574	11	116730638	SIK3	A	G	0.127297	0.325966	6.6499	1.2807	NP	APOA1, APOA4, APOA5, APOC3	Yes
Plasma-triglycerides	Fasting glucose / T2DM	rs3735964	8	19824045	LPL	A	C	0.092267	0.421936	-9.55331	-1.69492	-1.2222	LPL	Yes
Plasma-triglycerides	Fasting glucose / T2DM	rs4922119	8	19874153	LPL(dist=49383), SLC18A1(dist=128213)	T	C	0.389916	0.167995	-6.02082	-2.11111	-1.52062	LPL	Yes
Plasma-triglycerides	Fasting glucose / T2DM	rs6999158	8	19928013	LPL(dist=103243), SLC18A1(dist=74353)	A	T	0.344604	0.167455	-6.01098	-1.90476	-2.01794	LPL	Yes
Plasma-triglycerides	Fasting glucose / T2DM	rs1042034	2	21225281	APOB	C	T	0.254673	0.33799	-8.54733	0.232558	-1.33896	APOB	Yes
Plasma-triglycerides	Fasting glucose / T2DM	rs3764261	16	56993324	HERPUD1(dist=15531), CETP(dist=2511)	A	C	0.298991	0.217687	-6.85539	-1	0.666293	CETP	Yes
Plasma-triglycerides	Fasting glucose / T2DM	rs1168041	1	62960250	DOCK7	T	C	0.277994	0.336662	-8.52947	0.634146	0.666293	ANGPTL3?	No
Plasma-triglycerides	T2DM	rs34594435	7	72977249	BCL7B(dist=5184), TBL2(dist=6028)	T	C	0.172852	0.259488	-7.4861	NP	-0.570962	MLXIPL?	No
Plasma-triglycerides	Fasting glucose	rs1051921	7	73007943	MLXIPL	A	G	0.173937	0.257997	-7.46399	0.638298	NP	MLXIPL?	No
Plasma-triglycerides	Fasting glucose / T2DM	rs964184	11	116648917	ZNF259	G	C	0.138247	1.27138	16.6551	1.49057	2.01794	APOA1, APOA4, APOA5, APOC3	Yes
Plasma-triglycerides	Fasting glucose / T2DM	rs1729410	11	116665661	APOA5(dist=2525), APOA4(dist=25757)	G	C	0.499179	0.198426	6.54415	-1.17073	0	APOA1, APOA4, APOA5, APOC3	Yes
Plasma-triglycerides	T2DM	rs5128	11	116703640	APOC3	G	C	0.122284	0.380126	9.06617	NP	0.774523	APOA1, APOA4, APOA5, APOC3	Yes
Plasma-triglycerides	Fasting glucose	rs7115242	11	116908283	SIK3	A	G	0.117414	0.290603	7.92273	1.17241	NP	PCSK7?	No
Plasma-triglycerides	T2DM	rs508487	11	117075566	PCSK7, TAGLN	T	C	0.058257	0.185326	6.32387	NP	2.09266	PCSK7?	No
Plasma-triglycerides	Fasting glucose / T2DM	rs2980853	8	126478350	TRIB1(dist=27706), LINC00861(dist=456417)	C	A	0.487034	0.265511	-7.57288	0.611111	1.99881	TRIB1	No
M-VLDL-triglycerides	T2DM	rs6586884	8	19863358	LPL(dist=38588), SLC18A1(dist=139008)	C	T	0.089209	0.428591	-9.56095	NP	-0.383664	LPL	Yes
M-VLDL-triglycerides	Fasting glucose	rs6999813	8	19863471	LPL(dist=38701), SLC18A1(dist=138895)	A	T	0.089246	0.4284	-9.55858	-1.56667	NP	LPL	Yes
M-VLDL-triglycerides	Fasting glucose	rs17489539	8	19873582	LPL(dist=48812), SLC18A1(dist=128784)	A	T	0.389465	0.202199	-6.55973	-2.11111	NP	LPL	Yes
M-VLDL-triglycerides	Fasting glucose / T2DM	rs673548	2	21237544	APOB	A	G	0.254943	0.234583	-7.06684	0.409091	-0.666293	APOB	Yes
M-VLDL-triglycerides	Fasting glucose / T2DM	rs6065904	20	44534651	PLTP	A	G	0.228791	0.200512	6.53225	-0.0204082	-2.01794	PLTP	Yes
M-VLDL-triglycerides	Fasting glucose / T2DM	rs3764261	16	56993324	HERPUD1(dist=15531), CETP(dist=2511)	A	C	0.299643	0.154123	-5.72565	-1	0.666293	CETP	Yes
M-VLDL-triglycerides	Fasting glucose / T2DM	rs4350231	1	62922660	DOCK7	A	G	0.301346	0.211195	-6.70341	0.948718	1.33896	ANGPTL3?	No
M-VLDL-triglycerides	Fasting glucose / T2DM	rs17145750	7	73026378	MLXIPL	T	C	0.151196	0.355095	-8.69862	0.351852	-0.403626	MLXIPL?	No
M-VLDL-triglycerides	Fasting glucose / T2DM	rs964184	11	116648917	ZNF259	G	C	0.138198	1.22444	16.2252	1.49057	2.01794	APOA1, APOA4, APOA5, APOC3	Yes
M-VLDL-triglycerides	Fasting glucose / T2DM	rs1729410	11	116665661	APOA5(dist=2525), APOA4(dist=25757)	G	C	0.499041	0.195774	6.45416	-1.17073	0	APOA1, APOA4, APOA5, APOC3	Yes
M-VLDL-triglycerides	T2DM	rs5128	11	116703640	APOC3	G	C	0.122233	0.318503	8.23751	NP	0.774523	APOA1, APOA4, APOA5, APOC3	Yes
M-VLDL-triglycerides	Fasting glucose	rs7115242	11	116908283	SIK3	A	G	0.117384	0.25107	7.31054	1.17241	NP	PCSK7?	No
M-VLDL-triglycerides	T2DM	rs508487	11	117075566	PCSK7, TAGLN	T	C	0.058327	0.162493	5.87891	NP	2.09266	PCSK7?	No
S-VLDL-triglycerides	Fasting glucose / T2DM	rs11668477	19	11195030	SMARCA4(dist=22072), LDLR(dist=5008)	G	A	0.182556	0.15475	-5.77997	0.275862	1.52062	LDLR	Yes
S-VLDL-triglycerides	T2DM	rs6586884	8	19863358	LPL(dist=38588), SLC18A1(dist=139008)	C	T	0.089201	0.494496	-10.3496	NP	-0.383664	LPL	Yes
S-VLDL-triglycerides	Fasting glucose	rs6999813	8	19863471	LPL(dist=38701), SLC18A1(dist=138895)	A	T	0.089239	0.494314	-10.3474	-1.56667	NP	LPL	Yes
S-VLDL-triglycerides	Fasting glucose / T2DM	rs4922119	8	19874153	LPL(dist=49383), SLC18A1(dist=128213)	T	C	0.389936	0.227442	-7.00977	-2.11111	-1.52062	LPL	Yes
S-VLDL-triglycerides	Fasting glucose / T2DM	rs6547409	2	21190209	C2orf43(dist=167382), APOB(dist=34092)	T	C	0.061915	0.143616	-5.56721	-1	0.764588	APOB	Yes
S-VLDL-triglycerides	Fasting glucose / T2DM	rs1042034	2	21225281	APOB	C	T	0.254634	0.410595	-9.42702	0.232558	-1.33896	APOB	Yes
S-VLDL-triglycerides	Fasting glucose / T2DM	rs6065904	20	44534651	PLTP	A	G	0.228686	0.194404	6.47961	-0.0204082	-2.01794	PLTP	Yes
S-VLDL-triglycerides	Fasting glucose / T2DM	rs3764261	16	56993324	HERPUD1(dist=15531), CETP(dist=2511)	A	C	0.299043	0.399436	-9.29751	-1	0.666293	CETP	Yes
S-VLDL-triglycerides	Fasting glucose / T2DM	rs1168041	1	62960250	DOCK7	T	C	0.27802	0.271923	-7.66545	0.634146	0.666293	ANGPTL3?	No
S-VLDL-triglycerides	Fasting glucose / T2DM	rs13233571	7	72971231	BCL7B	T	C	0.121534	0.35479	-7.74587	-0.0877193	0	MLXIPL?	No
S-VLDL-triglycerides	Fasting glucose / T2DM	rs964184	11	116648917	ZNF259	G	C	0.138226	1.37844	17.3569	1.49057	2.01794	APOA1, APOA4, APOA5, APOC3	Yes
S-VLDL-triglycerides	Fasting glucose / T2DM	rs1729410	11	116665661	APOA5(dist=2525), APOA4(dist=25757)	G	C	0.499197	0.201601	6.59841	-1.17073	0	APOA1, APOA4, APOA5, APOC3	Yes
S-VLDL-triglycerides	T2DM	rs5128	11	116703640	APOC3	G	C	0.122259	0.412935	9.45373	NP	0.774523	APOA1, APOA4, APOA5, APOC3	Yes
S-VLDL-triglycerides	Fasting glucose	rs6589574	11	116730638	SIK3	A	G	0.125498	0.316724	8.27529	1.2807	NP	APOA1, APOA4, APOA5, APOC3	Yes
S-VLDL-triglycerides	Fasting glucose / T2DM	rs2980853	8	126478350	TRIB1(dist=27706), LINC00861(dist=456417)	C	A	0.487051	0.249884	-7.3483	0.611111	1.99881	TRIB1	No
XS-VLDL-phospholipids	Fasting glucose / T2DM	rs6511720	19	11202306	LDLR	T	G	0.099907	0.83072	-12.7055	0.617647	2.07424	LDLR	Yes
XS-VLDL-phospholipids	Fasting glucose / T2DM	rs12469741	2	20928577	C2orf43	G	A	0.081674	0.159754	-5.55239	0.1	1.37054	C2orf43?	No
XS-VLDL-phospholipids	Fasting glucose / T2DM	rs6732011	2	21146521	C2orf43(dist=123694), APOB(dist=77780)	T	G	0.384873	0.38024	8.57557	-0.447368	0	APOB	Yes
XS-VLDL-phospholipids	Fasting glucose / T2DM	rs952275	2	21221399	C2orf43(dist=198572), APOB(dist=2902)	G	T	0.426607	0.61493	10.9187	-1.22222	-0.50213	APOB	Yes
XS-VLDL-phospholipids	Fasting glucose / T2DM	rs533617	2	21233972	APOB	C	T	0.059912	0.366284	-8.41636	-1.41667	-0.525713	APOB	Yes
XS-VLDL-phospholipids	Fasting glucose / T2DM	rs541041	2	21294975	APOB(dist=28030), LOC645949(dist=615331)	G	A	0.182895	0.393243	-8.72222	0.604167	1.52062	APOB	Yes
XS-VLDL-phospholipids	Fasting glucose / T2DM	rs12038946	1	54769277	SSBP3	T	G	0.066653	0.163752	-5.62185	1.2	1.63709	ACOT11?	No
XS-VLDL-phospholipids	Fasting glucose / T2DM	rs17110517	1	54834840	SSBP3	T	C	0.05279	0.218297	-6.4924	1.25	0.378979	ACOT11?	No
XS-VLDL-phospholipids	Fasting glucose / T2DM	rs17395160	1	55085141	ACOT11, FAM151A	G	A	0.221799	0.158444	-5.52983	-0.563636	-0.666293	ACOT11	Yes
XS-VLDL-phospholipids	Fasting glucose / T2DM	rs12117661	1	55487346	BSND(dist=12881), PCSK9(dist=17803)	G	C	0.230942	0.336366	-8.06368	0.163265	0.50213	PCSK9	Yes
XS-VLDL-phospholipids	Fasting glucose	rs562556	1	55524237	PCSK9	G	A	0.175121	0.199634	-6.20825	-0.952381	NP	PCSK9	Yes
XS-VLDL-phospholipids	T2DM	rs565436	1	55524601	PCSK9	G	A	0.240965	0.206128	-6.30847	NP	0	PCSK9	Yes
XS-VLDL-phospholipids	Fasting glucose / T2DM	rs4927208	1	55713947	MIR4422(dist=22551), PPAP2B(dist=1246472)	A	T	0.172904	0.19249	-6.09546	-1.37097	1.00902	PCSK9?	No
XS-VLDL-phospholipids	Fasting glucose / T2DM	rs6662286	1	55730327	MIR4422(dist=38931), PPAP2B(dist=1230092)	T	C	0.108158	0.304183	-7.66739	-0.261364	1.2222	PCSK9?	No
XS-VLDL-phospholipids	Fasting glucose / T2DM	rs207133	1	55814595	MIR4422(dist=123199), PPAP2B(dist=1145824)	C	T	0.096741	0.165857	-5.65792	0.0689655	-0.337952	PCSK9?	No
XS-VLDL-phospholipids	Fasting glucose	rs247616	16	56989590	HERPUD1(dist=11797), CETP(dist=6245)	T	C	0.288584	0.274128	-7.27727	-1.38095	NP	CETP	Yes
XS-VLDL-phospholipids	T2DM	rs247617	16	56990716	HERPUD1(dist=12923), CETP(dist=5119)	A	C	0.288773	0.274294	-7.27948	NP	0.881126	CETP	Yes
XS-VLDL-phospholipids	Fasting glucose / T2DM	rs1711048	15	58629789	AQP9(dist=151679), LIPC(dist=94386)	G	A	0.126279	0.164696	-5.63761	1.01587	1.00902	LIPC	Yes
XS-VLDL-phospholipids	Fasting glucose / T2DM	rs479084	15	58666087	AQP9(dist=187977), LIPC(dist=58088)	G	C	0.375515	0.303803	-7.66258	2.92683	-0.666293	LIPC	Yes
XS-VLDL-phospholipids	Fasting glucose / T2DM	rs1532085	15	58683366	AQP9(dist=205256), LIPC(dist=40809)	A	G	0.405229	0.801071	12.4748	-2.89474	-1.99881	LIPC	Yes
XS-VLDL-phospholipids	Fasting glucose / T2DM	rs17821298	15	58690738	AQP9(dist=212628), LIPC(dist=33437)	A	C	0.238125	0.28654	7.44085	-1.25	0	LIPC	Yes
XS-VLDL-phospholipids	Fasting glucose / T2DM	rs261334	15	58726744	LIPC	G	C	0.230671	0.899121	13.2221	-1.43478	0.50213	LIPC	Yes
XS-VLDL-phospholipids	Fasting glucose / T2DM	rs1168041	1	62960250	DOCK7	T	C	0.272958	0.213591	-6.42155	0.634146	0.666293	ANGPTL3?	No
XS-VLDL-phospholipids	Fasting glucose	rs964184	11	116648917	ZNF259	G	C	0.142323	0.288617	7.46824	1.49057	NP	APOA1, APOA4, APOA5, APOC3	Yes
XS-VLDL-phospholipids	T2DM	rs3741298	11	116657561	ZNF259	C	T	0.228535	0.326277	7.94163	NP	-0.584755	APOA1, APOA4, APOA5, APOC3	Yes
XS-VLDL-phospholipids	Fasting glucose / T2DM	rs2954022	8	126482621	TRIB1(dist=31977), LINC00861(dist=452146)	A	C	0.481114	0.257236	-7.04944	0.583333	1.33896	TRIB1	No
XS-VLDL-triglycerides	Fasting glucose / T2DM	rs6511720	19	11202306	LDLR	T	G	0.099907	0.360539	-8.3505	0.617647	2.07424	LDLR	Yes
XS-VLDL-triglycerides	Fasting glucose / T2DM	rs10096633	8	19830921	LPL(dist=6151), SLC18A1(dist=171445)	T	C	0.094426	0.357969	-8.32036	-1.625	-2.03688	LPL	Yes
XS-VLDL-triglycerides	Fasting glucose / T2DM	rs4922119	8	19874153	LPL(dist=49383), SLC18A1(dist=128213)	T	C	0.38594	0.175042	-5.8129	-2.11111	-1.52062	LPL	Yes
XS-VLDL-triglycerides	Fasting glucose / T2DM	rs6544366	2	21204025	C2orf43(dist=181198), APOB(dist=20276)	T	G	0.274622	0.573443	-10.5417	-0.404762	-0.666293	APOB	Yes
XS-VLDL-triglycerides	Fasting glucose / T2DM	rs4635554	2	21389659	APOB(dist=122714), LOC645949(dist=520647)	G	T	0.289673	0.218319	6.49274	-1.61538	0.666293	APOB	Yes
XS-VLDL-triglycerides	Fasting glucose	rs247616	16	56989590	HERPUD1(dist=11797), CETP(dist=6245)	T	C	0.288584	0.524517	-10.079	-1.38095	NP	CETP	Yes
XS-VLDL-triglycerides	T2DM	rs247617	16	56990716	HERPUD1(dist=12923), CETP(dist=5119)	A	C	0.288773	0.528008	-10.1127	NP	0.881126	CETP	Yes
XS-VLDL-triglycerides	T2DM	rs4622454	15	58646332	AQP9(dist=168222), LIPC(dist=77843)	T	C	0.42542	0.198434	6.19002	NP	-0.666293	LIPC	No
XS-VLDL-triglycerides	T2DM	rs10468017	15	58678512	AQP9(dist=200402), LIPC(dist=45663)	T	C	0.313616	0.341342	8.12353	NP	-1.00902	LIPC	No
XS-VLDL-triglycerides	Fasting glucose / T2DM	rs261334	15	58726744	LIPC	G	C	0.230671	0.476923	9.6093	-1.43478	0.50213	LIPC	Yes
XS-VLDL-triglycerides	Fasting glucose / T2DM	rs1168041	1	62960250	DOCK7	T	C	0.272958	0.328898	-7.97316	0.634146	0.666293	ANGPTL3?	No
XS-VLDL-triglycerides	T2DM	rs34594435	7	72977249	BCL7B(dist=5184), TBL2(dist=6028)	T	C	0.171331	0.161035	-5.57493	NP	-0.570962	MLXIPL?	No
XS-VLDL-triglycerides	Fasting glucose	rs11974409	7	72989390	TBL2	G	A	0.171567	0.160303	-5.56237	0.595745	NP	MLXIPL?	No
XS-VLDL-triglycerides	Fasting glucose / T2DM	rs964184	11	116648917	ZNF259	G	C	0.142323	1.13807	14.8936	1.49057	2.01794	APOA1, APOA4, APOA5, APOC3	Yes
XS-VLDL-triglycerides	Fasting glucose / T2DM	rs1729410	11	116665661	APOA5(dist=2525), APOA4(dist=25757)	G	C	0.495602	0.176886	5.84318	-1.17073	0	APOA1, APOA4, APOA5, APOC3	Yes
XS-VLDL-triglycerides	T2DM	rs5128	11	116703640	APOC3	G	C	0.127216	0.458825	9.42436	NP	0.774523	APOA1, APOA4, APOA5, APOC3	Yes
XS-VLDL-triglycerides	Fasting glucose	rs6589574	11	116730638	SIK3	A	G	0.129813	0.365048	8.40209	1.2807	NP	APOA1, APOA4, APOA5, APOC3	Yes
XS-VLDL-triglycerides	T2DM	rs508487	11	117075566	PCSK7, TAGLN	T	C	0.060499	0.222493	6.55465	NP	2.09266	PCSK7?	No
XS-VLDL-triglycerides	Fasting glucose / T2DM	rs2954029	8	126490972	TRIB1(dist=40328), LINC00861(dist=443795)	T	A	0.48008	0.356765	-8.30588	0.472222	1.33896	TRIB1	No
IDL-phospholipids	Fasting glucose / T2DM	rs7251213	19	10640380	S1PR5(dist=11712), ATG4D(dist=14267)	G	A	0.387731	0.161092	5.89713	-0.837838	-0.994603	S1PR5	Yes
IDL-phospholipids	Fasting glucose / T2DM	rs6511720	19	11202306	LDLR	T	G	0.102662	0.863665	-13.7041	0.617647	2.07424	LDLR	Yes
IDL-phospholipids	Fasting glucose / T2DM	rs12469741	2	20928577	C2orf43	G	A	0.081674	0.198057	-6.18347	0.1	1.37054	C2orf43?	No
IDL-phospholipids	Fasting glucose / T2DM	rs10178381	2	21092106	C2orf43(dist=69279), APOB(dist=132195)	T	A	0.1336	0.167677	-6.0165	-1.71053	2.07424	APOB	Yes
IDL-phospholipids	Fasting glucose	rs4426495	2	21143982	C2orf43(dist=121155), APOB(dist=80319)	T	C	0.385787	0.282322	7.81178	-0.421053	NP	APOB	Yes
IDL-phospholipids	T2DM	rs10180633	2	21144829	C2orf43(dist=122002), APOB(dist=79472)	T	G	0.385378	0.282459	7.81332	NP	-0.206575	APOB	Yes
IDL-phospholipids	Fasting glucose / T2DM	rs952275	2	21221399	C2orf43(dist=198572), APOB(dist=2902)	G	T	0.433279	0.529286	10.7093	-1.22222	-0.50213	APOB	Yes
IDL-phospholipids	Fasting glucose / T2DM	rs533617	2	21233972	APOB	C	T	0.056816	0.279085	-7.76674	-1.41667	-0.525713	APOB	Yes
IDL-phospholipids	Fasting glucose / T2DM	rs541041	2	21294975	APOB(dist=28030), LOC645949(dist=615331)	G	A	0.180558	0.420362	-9.53917	0.604167	1.52062	APOB	Yes
IDL-phospholipids	Fasting glucose / T2DM	rs4639414	7	21589243	DNAH11	G	A	0.239211	0.179837	6.23153	-3.04348	0	(NA)	No
IDL-phospholipids	Fasting glucose / T2DM	rs913811	1	54602648	TCEANC2(dist=37232), CDCP2(dist=2020)	T	C	0.161034	0.151383	-5.71679	0.758065	2.03688	LDLRAD1?	No
IDL-phospholipids	Fasting glucose / T2DM	rs2297030	1	54722625	SSBP3	C	T	0.060968	0.16331	-5.93767	0.77	1.30236	ACOT11?	No
IDL-phospholipids	Fasting glucose / T2DM	rs12038946	1	54769277	SSBP3	T	G	0.066653	0.215018	-6.44369	1.2	1.63709	ACOT11?	No
IDL-phospholipids	Fasting glucose / T2DM	rs17110517	1	54834840	SSBP3	T	C	0.05279	0.278279	-7.33251	1.25	0.378979	ACOT11?	No
IDL-phospholipids	Fasting glucose / T2DM	rs17395160	1	55085141	ACOT11, FAM151A	G	A	0.210264	0.175239	-6.15135	-0.563636	-0.666293	ACOT11	Yes
IDL-phospholipids	Fasting glucose / T2DM	rs11588151	1	55487648	BSND(dist=13183), PCSK9(dist=17501)	G	A	0.183367	0.3093	-8.17704	0.648148	-0.50213	PCSK9	Yes
IDL-phospholipids	Fasting glucose / T2DM	rs17111503	1	55503448	BSND(dist=28983), PCSK9(dist=1701)	G	A	0.206555	0.143141	5.55835	-0.408163	0	PCSK9	Yes
IDL-phospholipids	T2DM	rs11587071	1	55522674	PCSK9	T	C	0.158512	0.202947	-6.62013	NP	0.0584489	PCSK9	Yes
IDL-phospholipids	Fasting glucose	rs562556	1	55524237	PCSK9	G	A	0.173801	0.19829	-6.54404	-0.952381	NP	PCSK9	Yes
IDL-phospholipids	Fasting glucose / T2DM	rs4927205	1	55711465	MIR4422(dist=20069), PPAP2B(dist=1248954)	G	A	0.161103	0.219126	-6.88014	-1.30159	0.81104	PCSK9?	No
IDL-phospholipids	Fasting glucose / T2DM	rs6662286	1	55730327	MIR4422(dist=38931), PPAP2B(dist=1230092)	T	C	0.103817	0.337424	-8.54252	-0.261364	1.2222	PCSK9?	No
IDL-phospholipids	Fasting glucose / T2DM	rs207133	1	55814595	MIR4422(dist=123199), PPAP2B(dist=1145824)	C	T	0.096109	0.188053	-6.37269	0.0689655	-0.337952	PCSK9?	No
IDL-phospholipids	Fasting glucose / T2DM	rs1532085	15	58683366	AQP9(dist=205256), LIPC(dist=40809)	A	G	0.401448	0.433432	9.68719	-2.89474	-1.99881	LIPC	Yes
IDL-phospholipids	Fasting glucose / T2DM	rs17821298	15	58690738	AQP9(dist=212628), LIPC(dist=33437)	A	C	0.233312	0.160385	5.88416	-1.25	0	LIPC	Yes
IDL-phospholipids	Fasting glucose / T2DM	rs261334	15	58726744	LIPC	G	C	0.224722	0.519317	10.6077	-1.43478	0.50213	LIPC	Yes
IDL-phospholipids	Fasting glucose / T2DM	rs1168041	1	62960250	DOCK7	T	C	0.278022	0.163777	-5.94588	0.634146	0.666293	ANGPTL3?	No
IDL-phospholipids	Fasting glucose	rs964184	11	116648917	ZNF259	G	C	0.138224	0.1952	6.49289	1.49057	NP	APOA1, APOA4, APOA5, APOC3	Yes
IDL-phospholipids	T2DM	rs3741298	11	116657561	ZNF259	C	T	0.221802	0.20843	6.70945	NP	-0.584755	APOA1, APOA4, APOA5, APOC3	Yes
IDL-phospholipids	Fasting glucose / T2DM	rs2954022	8	126482621	TRIB1(dist=31977), LINC00861(dist=452146)	A	C	0.484494	0.230433	-7.05582	0.583333	1.33896	TRIB1	No
IDL-triglycerides	Fasting glucose / T2DM	rs6511720	19	11202306	LDLR	T	G	0.099907	0.530176	-10.1348	0.617647	2.07424	LDLR	Yes
IDL-triglycerides	Fasting glucose / T2DM	rs6544366	2	21204025	C2orf43(dist=181198), APOB(dist=20276)	T	G	0.274622	0.48977	-9.73824	-0.404762	-0.666293	APOB	Yes
IDL-triglycerides	Fasting glucose / T2DM	rs7567217	2	21303470	APOB(dist=36525), LOC645949(dist=606836)	C	T	0.136605	0.353534	-8.26762	0.78	0.81104	APOB	Yes
IDL-triglycerides	Fasting glucose / T2DM	rs12117661	1	55487346	BSND(dist=12881), PCSK9(dist=17803)	G	C	0.230942	0.231868	-6.69145	0.163265	0.50213	PCSK9	Yes
IDL-triglycerides	Fasting glucose	rs247616	16	56989590	HERPUD1(dist=11797), CETP(dist=6245)	T	C	0.288584	0.278645	-7.33715	-1.38095	NP	CETP	Yes
IDL-triglycerides	T2DM	rs247617	16	56990716	HERPUD1(dist=12923), CETP(dist=5119)	A	C	0.288773	0.279493	-7.34833	NP	0.881126	CETP	Yes
IDL-triglycerides	Fasting glucose / T2DM	rs2642636	15	58363242	ALDH1A2(dist=5121), AQP9(dist=67166)	C	G	0.373921	0.171168	5.74779	-1.68421	0	(NA)	No
IDL-triglycerides	Fasting glucose / T2DM	rs185481	15	58666679	AQP9(dist=188569), LIPC(dist=57496)	T	C	0.460317	0.406219	8.8653	-2.1	0.994603	LIPC	Yes
IDL-triglycerides	Fasting glucose / T2DM	rs1532085	15	58683366	AQP9(dist=205256), LIPC(dist=40809)	A	G	0.405229	1.13833	14.8961	-2.89474	-1.99881	LIPC	Yes
IDL-triglycerides	Fasting glucose / T2DM	rs8042174	15	58685970	AQP9(dist=207860), LIPC(dist=38205)	C	T	0.073117	0.213891	-6.42691	-0.347826	1.00902	LIPC	Yes
IDL-triglycerides	Fasting glucose / T2DM	rs17821298	15	58690738	AQP9(dist=212628), LIPC(dist=33437)	A	C	0.238125	0.356249	8.29964	-1.25	0	LIPC	Yes
IDL-triglycerides	Fasting glucose / T2DM	rs261334	15	58726744	LIPC	G	C	0.230671	1.32722	16.0991	-1.43478	0.50213	LIPC	Yes
IDL-triglycerides	T2DM	rs11633043	15	58837722	LIPC	A	G	0.173335	0.160026	5.55684	NP	-0.459015	LIPC	Yes
IDL-triglycerides	Fasting glucose / T2DM	rs1872741	15	59450895	MYO1E	T	A	0.195205	0.161215	5.57747	0.647059	-2.03688	(NA)	No
IDL-triglycerides	Fasting glucose / T2DM	rs1168041	1	62960250	DOCK7	T	C	0.272958	0.26414	-7.14292	0.634146	0.666293	ANGPTL3?	No
IDL-triglycerides	Fasting glucose	rs9302635	16	72144174	DHX38	C	T	0.174853	0.172827	-5.77608	-1.06122	NP	HPR?	No
IDL-triglycerides	Fasting glucose / T2DM	rs964184	11	116648917	ZNF259	G	C	0.142323	0.539063	10.2193	1.49057	2.01794	APOA1, APOA4, APOA5, APOC3	Yes
IDL-triglycerides	T2DM	rs5072	11	116707583	APOA1	A	G	0.120625	0.253481	6.99731	NP	0.51403	APOA1, APOA4, APOA5, APOC3	Yes
IDL-triglycerides	Fasting glucose	rs6589574	11	116730638	SIK3	A	G	0.129813	0.212135	6.40008	1.2807	NP	APOA1, APOA4, APOA5, APOC3	Yes
IDL-triglycerides	Fasting glucose / T2DM	rs2954029	8	126490972	TRIB1(dist=40328), LINC00861(dist=443795)	T	A	0.48008	0.340081	-8.10866	0.472222	1.33896	TRIB1	No
L-LDL-free cholesterol	Fasting glucose / T2DM	rs7251213	19	10640380	S1PR5(dist=11712), ATG4D(dist=14267)	G	A	0.387717	0.175558	6.1561	-0.837838	-0.994603	S1PR5	Yes
L-LDL-free cholesterol	Fasting glucose / T2DM	rs6511720	19	11202306	LDLR	T	G	0.102658	0.970259	-14.5316	0.617647	2.07424	LDLR	Yes
L-LDL-free cholesterol	Fasting glucose	rs2738446	19	11227326	LDLR	G	C	0.453632	0.157227	5.82544	1.44444	NP	LDLR	Yes
L-LDL-free cholesterol	Fasting glucose / T2DM	rs12469741	2	20928577	C2orf43	G	A	0.081674	0.222591	-6.55608	0.1	1.37054	C2orf43?	No
L-LDL-free cholesterol	Fasting glucose / T2DM	rs533617	2	21233972	APOB	C	T	0.056821	0.254794	-7.41946	-1.41667	-0.525713	APOB	Yes
L-LDL-free cholesterol	Fasting glucose / T2DM	rs1367117	2	21263900	APOB	A	G	0.287049	0.512018	10.5315	-2.19512	1.33896	APOB	Yes
L-LDL-free cholesterol	Fasting glucose / T2DM	rs562338	2	21288321	APOB(dist=21376), LOC645949(dist=621985)	A	G	0.183227	0.426646	-9.60917	0.833333	2.01794	APOB	Yes
L-LDL-free cholesterol	Fasting glucose / T2DM	rs4639414	7	21589243	DNAH11	G	A	0.239217	0.189015	6.38826	-3.04348	0	(NA)	No
L-LDL-free cholesterol	Fasting glucose / T2DM	rs913811	1	54602648	TCEANC2(dist=37232), CDCP2(dist=2020)	T	C	0.161045	0.159213	-5.86244	0.758065	2.03688	LDLRAD1?	No
L-LDL-free cholesterol	Fasting glucose / T2DM	rs2297030	1	54722625	SSBP3	C	T	0.060969	0.215065	-6.81501	0.77	1.30236	ACOT11?	No
L-LDL-free cholesterol	Fasting glucose / T2DM	rs12038946	1	54769277	SSBP3	T	G	0.066653	0.219372	-6.50874	1.2	1.63709	ACOT11?	No
L-LDL-free cholesterol	Fasting glucose / T2DM	rs17110517	1	54834840	SSBP3	T	C	0.05279	0.315092	-7.80389	1.25	0.378979	ACOT11?	No
L-LDL-free cholesterol	Fasting glucose / T2DM	rs17395160	1	55085141	ACOT11, FAM151A	G	A	0.210282	0.213771	-6.79474	-0.563636	-0.666293	ACOT11	Yes
L-LDL-free cholesterol	Fasting glucose / T2DM	rs11588151	1	55487648	BSND(dist=13183), PCSK9(dist=17501)	G	A	0.183372	0.352329	-8.72838	0.648148	-0.50213	PCSK9	Yes
L-LDL-free cholesterol	Fasting glucose / T2DM	rs17111503	1	55503448	BSND(dist=28983), PCSK9(dist=1701)	G	A	0.206546	0.164517	5.95904	-0.408163	0	PCSK9	Yes
L-LDL-free cholesterol	T2DM	rs11587071	1	55522674	PCSK9	T	C	0.158513	0.264008	-7.55225	NP	0.0584489	PCSK9	Yes
L-LDL-free cholesterol	Fasting glucose	rs562556	1	55524237	PCSK9	G	A	0.173803	0.248897	-7.33288	-0.952381	NP	PCSK9	Yes
L-LDL-free cholesterol	Fasting glucose / T2DM	rs4927205	1	55711465	MIR4422(dist=20069), PPAP2B(dist=1248954)	G	A	0.161122	0.271489	-7.6595	-1.30159	0.81104	PCSK9?	No
L-LDL-free cholesterol	Fasting glucose / T2DM	rs6662286	1	55730327	MIR4422(dist=38931), PPAP2B(dist=1230092)	T	C	0.103823	0.438081	-9.73765	-0.261364	1.2222	PCSK9?	No
L-LDL-free cholesterol	Fasting glucose / T2DM	rs2746685	1	55837603	MIR4422(dist=146207), PPAP2B(dist=1122816)	A	G	0.088123	0.209801	-6.73122	-0.274194	-1.02325	PCSK9?	No
L-LDL-free cholesterol	Fasting glucose / T2DM	rs261334	15	58726744	LIPC	G	C	0.224732	0.209874	6.73238	-1.43478	0.50213	LIPC	Yes
L-LDL-free cholesterol	Fasting glucose / T2DM	rs2954022	8	126482621	TRIB1(dist=31977), LINC00861(dist=452146)	A	C	0.484489	0.1493	-5.67659	0.583333	1.33896	TRIB1	No
XS-LDL-cholesterol	Fasting glucose / T2DM	rs6511720	19	11202306	LDLR	T	G	0.102659	0.735912	-12.641	0.617647	2.07424	LDLR	Yes
XS-LDL-cholesterol	Fasting glucose / T2DM	rs12469741	2	20928577	C2orf43	G	A	0.081674	0.160535	-5.56597	0.1	1.37054	C2orf43?	No
XS-LDL-cholesterol	Fasting glucose / T2DM	rs533617	2	21233972	APOB	C	T	0.05682	0.293358	-7.96289	-1.41667	-0.525713	APOB	Yes
XS-LDL-cholesterol	Fasting glucose / T2DM	rs1367117	2	21263900	APOB	A	G	0.28705	0.405774	9.37063	-2.19512	1.33896	APOB	Yes
XS-LDL-cholesterol	Fasting glucose / T2DM	rs562338	2	21288321	APOB(dist=21376), LOC645949(dist=621985)	A	G	0.183227	0.295282	-7.98903	0.833333	2.01794	APOB	Yes
XS-LDL-cholesterol	Fasting glucose / T2DM	rs2297030	1	54722625	SSBP3	C	T	0.060969	0.156367	-5.80947	0.77	1.30236	ACOT11?	No
XS-LDL-cholesterol	Fasting glucose / T2DM	rs17110517	1	54834840	SSBP3	T	C	0.05279	0.252086	-6.97797	1.25	0.378979	ACOT11?	No
XS-LDL-cholesterol	Fasting glucose / T2DM	rs17395160	1	55085141	ACOT11, FAM151A	G	A	0.210278	0.208738	-6.71426	-0.563636	-0.666293	ACOT11	Yes
XS-LDL-cholesterol	Fasting glucose / T2DM	rs11588151	1	55487648	BSND(dist=13183), PCSK9(dist=17501)	G	A	0.183371	0.282272	-7.81001	0.648148	-0.50213	PCSK9	Yes
XS-LDL-cholesterol	Fasting glucose / T2DM	rs17111503	1	55503448	BSND(dist=28983), PCSK9(dist=1701)	G	A	0.206548	0.142984	5.55493	-0.408163	0	PCSK9	Yes
XS-LDL-cholesterol	Fasting glucose / T2DM	rs2479408	1	55504188	PCSK9	G	C	0.171227	0.14995	-5.68855	1	0.764033	PCSK9	Yes
XS-LDL-cholesterol	Fasting glucose / T2DM	rs562556	1	55524237	PCSK9	G	A	0.173802	0.181417	-6.25846	-0.952381	-0.459015	PCSK9	Yes
XS-LDL-cholesterol	Fasting glucose / T2DM	rs4927208	1	55713947	MIR4422(dist=22551), PPAP2B(dist=1246472)	A	T	0.16027	0.219302	-6.88179	-1.37097	1.00902	PCSK9?	No
XS-LDL-cholesterol	Fasting glucose / T2DM	rs6662286	1	55730327	MIR4422(dist=38931), PPAP2B(dist=1230092)	T	C	0.103822	0.340618	-8.58239	-0.261364	1.2222	PCSK9?	No
XS-LDL-cholesterol	Fasting glucose / T2DM	rs2746683	1	55841735	MIR4422(dist=150339), PPAP2B(dist=1118684)	A	C	0.088313	0.176381	-6.17053	0.015873	-1.37054	PCSK9?	No
XS-LDL-cholesterol	Fasting glucose / T2DM	rs2000999	16	72108093	HPR	A	G	0.192815	0.164072	5.95152	-0.782609	-0.666293	HPR?	No
XS-LDL-cholesterol	Fasting glucose / T2DM	rs4704183	5	74471048	ANKRD31	G	C	0.346574	0.142382	-5.54334	2.13158	0.994603	HMGCR?	No
XS-LDL-cholesterol	Fasting glucose / T2DM	rs964184	11	116648917	ZNF259	G	C	0.138229	0.267053	7.59666	1.49057	2.01794	APOA1, APOA4, APOA5, APOC3	Yes
XS-LDL-cholesterol	Fasting glucose / T2DM	rs17321515	8	126486409	TRIB1(dist=35765), LINC00861(dist=448358)	G	A	0.487095	0.218169	-6.86459	0.444444	0.666293	TRIB1	No
HDL-cholesterol	Fasting glucose / T2DM	rs291	8	19815852	LPL	C	T	0.23101	0.315502	8.25792	-1.8	-1.52062	LPL	Yes
HDL-cholesterol	Fasting glucose / T2DM	rs6065904	20	44534651	PLTP	A	G	0.228691	0.148654	-5.66442	-0.0204082	-2.01794	PLTP	Yes
HDL-cholesterol	Fasting glucose / T2DM	rs6507939	18	47176261	LIPG(dist=56983), ACAA2(dist=133613)	A	C	0.156611	0.219284	-6.8815	-0.792453	1.00902	LIPG	Yes
HDL-cholesterol	Fasting glucose / T2DM	rs11865000	16	56865374	NUP93	A	G	0.105803	0.147106	-5.63453	-1	-0.81104	CETP	Yes
HDL-cholesterol	T2DM	rs16963397	16	56927441	SLC12A3	C	G	0.189407	0.167464	-6.01241	NP	0.666293	CETP	Yes
HDL-cholesterol	T2DM	rs247617	16	56990716	HERPUD1(dist=12923), CETP(dist=5119)	A	C	0.297503	2.02335	21.0949	NP	0.881126	CETP	Yes
HDL-cholesterol	Fasting glucose	rs3764261	16	56993324	HERPUD1(dist=15531), CETP(dist=2511)	A	C	0.299031	2.01855	21.0713	-1	NP	CETP	Yes
HDL-cholesterol	Fasting glucose / T2DM	rs289744	16	57018102	CETP	G	T	0.333036	0.324456	8.37543	1.25581	0	CETP	Yes
HDL-cholesterol	Fasting glucose / T2DM	rs1532085	15	58683366	AQP9(dist=205256), LIPC(dist=40809)	A	G	0.401454	0.732186	12.6084	-2.89474	-1.99881	LIPC	Yes
HDL-cholesterol	Fasting glucose / T2DM	rs17821298	15	58690738	AQP9(dist=212628), LIPC(dist=33437)	A	C	0.233319	0.179325	6.22192	-1.25	0	LIPC	Yes
HDL-cholesterol	Fasting glucose / T2DM	rs2070895	15	58723939	LIPC	A	G	0.244775	0.583774	11.2494	-1.5625	0	LIPC	Yes
HDL-cholesterol	Fasting glucose / T2DM	rs7925835	11	116985641	SIK3(dist=16648), PAFAH1B2(dist=29359)	G	T	0.052424	0.166372	5.99247	-0.395604	0.188653	PCSK7?	No
XL-HDL-cholesterol	Fasting glucose / T2DM	rs4810479	20	44545048	PLTP(dist=4045), PCIF1(dist=18269)	C	T	0.264452	0.508899	-10.4961	0.309524	-0.666293	PLTP	Yes
XL-HDL-cholesterol	Fasting glucose / T2DM	rs1943973	18	47179516	LIPG(dist=60238), ACAA2(dist=130358)	G	A	0.153599	0.192302	-6.44173	-0.944444	0.50213	LIPG	Yes
XL-HDL-cholesterol	Fasting glucose / T2DM	rs1532624	16	57005479	CETP	A	C	0.432488	0.762044	12.8604	-0.7	0	CETP	Yes
XL-HDL-cholesterol	Fasting glucose / T2DM	rs5882	16	57016092	CETP	G	A	0.361161	0.190557	6.41252	1.67442	-0.666293	CETP	Yes
XL-HDL-cholesterol	Fasting glucose / T2DM	rs185481	15	58666679	AQP9(dist=188569), LIPC(dist=57496)	T	C	0.466103	0.148184	5.65334	-2.1	0.994603	LIPC	Yes
XL-HDL-cholesterol	Fasting glucose / T2DM	rs1532085	15	58683366	AQP9(dist=205256), LIPC(dist=40809)	A	G	0.401476	1.03256	14.9904	-2.89474	-1.99881	LIPC	Yes
XL-HDL-cholesterol	Fasting glucose / T2DM	rs17821298	15	58690738	AQP9(dist=212628), LIPC(dist=33437)	A	C	0.233347	0.146612	5.62297	-1.25	0	LIPC	Yes
XL-HDL-cholesterol	Fasting glucose / T2DM	rs2070895	15	58723939	LIPC	A	G	0.244799	0.956339	14.4203	-1.5625	0	LIPC	Yes
XL-HDL-cholesterol	Fasting glucose / T2DM	rs16940472	15	58835317	LIPC	A	C	0.085612	0.155767	5.796	-0.805556	0.403626	LIPC	Yes
XL-HDL-cholesterol	T2DM	rs11633043	15	58837722	LIPC	A	G	0.16783	0.227248	7.00304	NP	-0.459015	LIPC	Yes
XL-HDL-cholesterol	Fasting glucose	rs7178362	15	58847263	LIPC	C	T	0.118729	0.159789	5.87116	0.684211	NP	LIPC	Yes
XL-HDL-free cholesterol	Fasting glucose / T2DM	rs6999813	8	19863471	LPL(dist=38701), SLC18A1(dist=138895)	A	T	0.089209	0.175474	6.1529	-1.56667	-2.03688	LPL	Yes
XL-HDL-free cholesterol	Fasting glucose / T2DM	rs6544366	2	21204025	C2orf43(dist=181198), APOB(dist=20276)	T	G	0.267916	0.181783	6.26273	-0.404762	-0.666293	APOB	Yes
XL-HDL-free cholesterol	Fasting glucose / T2DM	rs4810479	20	44545048	PLTP(dist=4045), PCIF1(dist=18269)	C	T	0.264454	0.580352	-11.2133	0.309524	-0.666293	PLTP	Yes
XL-HDL-free cholesterol	Fasting glucose / T2DM	rs6507939	18	47176261	LIPG(dist=56983), ACAA2(dist=133613)	A	C	0.156633	0.189947	-6.4018	-0.792453	1.00902	LIPG	Yes
XL-HDL-free cholesterol	Fasting glucose / T2DM	rs3764261	16	56993324	HERPUD1(dist=15531), CETP(dist=2511)	A	C	0.298979	0.929463	14.2153	-1	0.666293	CETP	Yes
XL-HDL-free cholesterol	T2DM	rs289716	16	57009376	CETP	T	A	0.34297	0.228631	7.02469	NP	1.26684	CETP	Yes
XL-HDL-free cholesterol	Fasting glucose	rs289741	16	57017474	CETP	G	A	0.333881	0.223091	6.93934	1.4186	NP	CETP	Yes
XL-HDL-free cholesterol	Fasting glucose / T2DM	rs938507	15	58582034	AQP9(dist=103924), LIPC(dist=142141)	A	G	0.134009	0.14299	5.55324	-0.894737	-0.666293	LIPC	Yes
XL-HDL-free cholesterol	Fasting glucose / T2DM	rs185481	15	58666679	AQP9(dist=188569), LIPC(dist=57496)	T	C	0.466108	0.200505	6.57811	-2.1	0.994603	LIPC	Yes
XL-HDL-free cholesterol	Fasting glucose / T2DM	rs1532085	15	58683366	AQP9(dist=205256), LIPC(dist=40809)	A	G	0.401473	1.44501	17.7713	-2.89474	-1.99881	LIPC	Yes
XL-HDL-free cholesterol	Fasting glucose / T2DM	rs8042174	15	58685970	AQP9(dist=207860), LIPC(dist=38205)	C	T	0.075738	0.178073	-6.19867	-0.347826	1.00902	LIPC	Yes
XL-HDL-free cholesterol	Fasting glucose / T2DM	rs17821298	15	58690738	AQP9(dist=212628), LIPC(dist=33437)	A	C	0.233344	0.234597	7.1163	-1.25	0	LIPC	Yes
XL-HDL-free cholesterol	Fasting glucose / T2DM	rs12912415	15	58721447	AQP9(dist=243337), LIPC(dist=2728)	G	A	0.143955	0.161996	-5.91093	0.517857	0.50213	LIPC	Yes
XL-HDL-free cholesterol	Fasting glucose / T2DM	rs2070895	15	58723939	LIPC	A	G	0.244796	1.29361	16.8009	-1.5625	0	LIPC	Yes
XL-HDL-free cholesterol	Fasting glucose / T2DM	rs16940472	15	58835317	LIPC	A	C	0.085606	0.219264	6.87911	-0.805556	0.403626	LIPC	Yes
XL-HDL-free cholesterol	T2DM	rs11633043	15	58837722	LIPC	A	G	0.167825	0.249464	7.33852	NP	-0.459015	LIPC	Yes
XL-HDL-free cholesterol	Fasting glucose	rs7178362	15	58847263	LIPC	C	T	0.118726	0.175909	6.16098	0.684211	NP	LIPC	Yes
XL-HDL-free cholesterol	Fasting glucose / T2DM	rs7298751	12	125380232	SCARB1(dist=31713), UBC(dist=15960)	G	A	0.138817	0.151487	5.7161	-0.483333	0	SCARB1	Yes
XL-HDL-phospholipids	Fasting glucose / T2DM	rs291	8	19815852	LPL	C	T	0.227915	0.231506	6.68586	-1.8	-1.52062	LPL	Yes
XL-HDL-phospholipids	Fasting glucose / T2DM	rs6544366	2	21204025	C2orf43(dist=181198), APOB(dist=20276)	T	G	0.274622	0.174507	5.80368	-0.404762	-0.666293	APOB	Yes
XL-HDL-phospholipids	Fasting glucose / T2DM	rs12480887	20	44427418	DNTTIP1	G	A	0.112479	0.237489	-6.77296	0.37931	0	PLTP?	No
XL-HDL-phospholipids	Fasting glucose / T2DM	rs6065904	20	44534651	PLTP	A	G	0.233223	0.921293	-13.386	-0.0204082	-2.01794	PLTP	Yes
XL-HDL-phospholipids	Fasting glucose / T2DM	rs6094238	20	44653107	SLC12A5	G	C	0.232492	0.177439	-5.85188	-1.1519	0.50213	PLTP?	No
XL-HDL-phospholipids	Fasting glucose / T2DM	rs6507939	18	47176261	LIPG(dist=56983), ACAA2(dist=133613)	A	C	0.160859	0.205706	-6.30183	-0.792453	1.00902	LIPG	Yes
XL-HDL-phospholipids	T2DM	rs247617	16	56990716	HERPUD1(dist=12923), CETP(dist=5119)	A	C	0.288773	1.19336	15.2542	NP	0.881126	CETP	Yes
XL-HDL-phospholipids	Fasting glucose	rs3764261	16	56993324	HERPUD1(dist=15531), CETP(dist=2511)	A	C	0.288912	1.191	15.2405	-1	NP	CETP	Yes
XL-HDL-phospholipids	T2DM	rs289716	16	57009376	CETP	T	A	0.348126	0.242239	6.83964	NP	1.26684	CETP	Yes
XL-HDL-phospholipids	Fasting glucose	rs289741	16	57017474	CETP	G	A	0.336175	0.234959	6.73636	1.4186	NP	CETP	Yes
XL-HDL-phospholipids	Fasting glucose / T2DM	rs17240160	15	58078261	GCOM1(dist=68506), ALDH1A2(dist=167361)	A	T	0.213737	0.184349	-5.96524	0.791667	-0.50213	(NA)	No
XL-HDL-phospholipids	Fasting glucose / T2DM	rs938507	15	58582034	AQP9(dist=103924), LIPC(dist=142141)	A	G	0.141845	0.255464	7.02469	-0.894737	-0.666293	LIPC	Yes
XL-HDL-phospholipids	Fasting glucose / T2DM	rs479084	15	58666087	AQP9(dist=187977), LIPC(dist=58088)	G	C	0.375515	0.312609	-7.77318	2.92683	-0.666293	LIPC	Yes
XL-HDL-phospholipids	Fasting glucose / T2DM	rs1532085	15	58683366	AQP9(dist=205256), LIPC(dist=40809)	A	G	0.405229	2.07997	20.2323	-2.89474	-1.99881	LIPC	Yes
XL-HDL-phospholipids	Fasting glucose / T2DM	rs8042174	15	58685970	AQP9(dist=207860), LIPC(dist=38205)	C	T	0.073117	0.254286	-7.00898	-0.347826	1.00902	LIPC	Yes
XL-HDL-phospholipids	Fasting glucose / T2DM	rs17821298	15	58690738	AQP9(dist=212628), LIPC(dist=33437)	A	C	0.238125	0.389858	8.68377	-1.25	0	LIPC	Yes
XL-HDL-phospholipids	Fasting glucose / T2DM	rs12912415	15	58721447	AQP9(dist=243337), LIPC(dist=2728)	G	A	0.148106	0.270497	-7.2284	0.517857	0.50213	LIPC	Yes
XL-HDL-phospholipids	Fasting glucose / T2DM	rs2070895	15	58723939	LIPC	A	G	0.24883	1.8634	19.1279	-1.5625	0	LIPC	Yes
XL-HDL-phospholipids	Fasting glucose / T2DM	rs12324517	15	58800766	LIPC	C	T	0.461822	0.158978	5.53929	-0.275	-1.99881	LIPC	Yes
XL-HDL-phospholipids	Fasting glucose / T2DM	rs16940472	15	58835317	LIPC	A	C	0.093336	0.296556	7.56997	-0.805556	0.403626	LIPC	Yes
XL-HDL-phospholipids	T2DM	rs11633043	15	58837722	LIPC	A	G	0.173335	0.330306	7.99027	NP	-0.459015	LIPC	Yes
XL-HDL-phospholipids	Fasting glucose	rs7178362	15	58847263	LIPC	C	T	0.12148	0.215362	6.44919	0.684211	NP	LIPC	Yes
XL-HDL-phospholipids	Fasting glucose / T2DM	rs10846748	12	125318309	SCARB1	T	C	0.304113	0.170041	5.72867	-1.59091	-0.50213	SCARB1	Yes
XL-HDL-phospholipids	Fasting glucose / T2DM	rs7298751	12	125380232	SCARB1(dist=31713), UBC(dist=15960)	G	A	0.13967	0.229001	6.65003	-0.483333	0	SCARB1	Yes
XL-HDL-phospholipids	Fasting glucose / T2DM	rs5082	1	161193683	APOA2	G	A	0.39633	0.157993	5.52179	-1.26316	-0.666293	APOA2	Yes
L-HDL-cholesterol	Fasting glucose / T2DM	rs291	8	19815852	LPL	C	T	0.231014	0.343651	8.62025	-1.8	-1.52062	LPL	Yes
L-HDL-cholesterol	Fasting glucose / T2DM	rs6544366	2	21204025	C2orf43(dist=181198), APOB(dist=20276)	T	G	0.267874	0.157241	5.82611	-0.404762	-0.666293	APOB	Yes
L-HDL-cholesterol	Fasting glucose / T2DM	rs12480887	20	44427418	DNTTIP1	G	A	0.116259	0.162155	-5.91686	0.37931	0	PLTP?	No
L-HDL-cholesterol	Fasting glucose / T2DM	rs6065904	20	44534651	PLTP	A	G	0.228686	0.619975	-11.5961	-0.0204082	-2.01794	PLTP	Yes
L-HDL-cholesterol	Fasting glucose / T2DM	rs6507939	18	47176261	LIPG(dist=56983), ACAA2(dist=133613)	A	C	0.156606	0.229167	-7.03571	-0.792453	1.00902	LIPG	Yes
L-HDL-cholesterol	T2DM	rs247617	16	56990716	HERPUD1(dist=12923), CETP(dist=5119)	A	C	0.297513	1.72135	19.4285	NP	0.881126	CETP	Yes
L-HDL-cholesterol	Fasting glucose	rs3764261	16	56993324	HERPUD1(dist=15531), CETP(dist=2511)	A	C	0.299043	1.71416	19.389	-1	NP	CETP	Yes
L-HDL-cholesterol	T2DM	rs289716	16	57009376	CETP	T	A	0.342938	0.28415	7.83638	NP	1.26684	CETP	Yes
L-HDL-cholesterol	Fasting glucose	rs289719	16	57009941	CETP	T	C	0.333038	0.279557	7.77314	1.64286	NP	CETP	Yes
L-HDL-cholesterol	Fasting glucose / T2DM	rs938507	15	58582034	AQP9(dist=103924), LIPC(dist=142141)	A	G	0.13396	0.230513	7.05655	-0.894737	-0.666293	LIPC	Yes
L-HDL-cholesterol	Fasting glucose / T2DM	rs185481	15	58666679	AQP9(dist=188569), LIPC(dist=57496)	T	C	0.466145	0.209872	6.73283	-2.1	0.994603	LIPC	Yes
L-HDL-cholesterol	Fasting glucose / T2DM	rs1532085	15	58683366	AQP9(dist=205256), LIPC(dist=40809)	A	G	0.401449	1.41846	17.6114	-2.89474	-1.99881	LIPC	Yes
L-HDL-cholesterol	Fasting glucose / T2DM	rs8042174	15	58685970	AQP9(dist=207860), LIPC(dist=38205)	C	T	0.075755	0.148505	-5.66197	-0.347826	1.00902	LIPC	Yes
L-HDL-cholesterol	Fasting glucose / T2DM	rs17821298	15	58690738	AQP9(dist=212628), LIPC(dist=33437)	A	C	0.233313	0.286024	7.86262	-1.25	0	LIPC	Yes
L-HDL-cholesterol	Fasting glucose / T2DM	rs1077835	15	58723426	LIPC	G	A	0.245347	1.11208	15.5679	-0.636364	-0.81104	LIPC	Yes
L-HDL-cholesterol	Fasting glucose / T2DM	rs12914035	15	58730889	LIPC	G	A	0.154286	0.154804	-5.78085	0.472727	-0.50213	LIPC	Yes
L-HDL-cholesterol	Fasting glucose / T2DM	rs16940472	15	58835317	LIPC	A	C	0.085557	0.189369	6.3944	-0.805556	0.403626	LIPC	Yes
L-HDL-cholesterol	T2DM	rs11633043	15	58837722	LIPC	A	G	0.167791	0.146726	5.62724	NP	-0.459015	LIPC	Yes
L-HDL-cholesterol	Fasting glucose / T2DM	rs964184	11	116648917	ZNF259	G	C	0.138226	0.157302	-5.82738	1.49057	2.01794	APOA1, APOA4, APOA5, APOC3	Yes
L-HDL-cholesterol	Fasting glucose / T2DM	rs7298751	12	125380232	SCARB1(dist=31713), UBC(dist=15960)	G	A	0.138811	0.162814	5.92848	-0.483333	0	SCARB1	Yes
L-HDL-free cholesterol	Fasting glucose / T2DM	rs291	8	19815852	LPL	C	T	0.231015	0.367959	8.92122	-1.8	-1.52062	LPL	Yes
L-HDL-free cholesterol	Fasting glucose / T2DM	rs6544366	2	21204025	C2orf43(dist=181198), APOB(dist=20276)	T	G	0.267871	0.147627	5.64505	-0.404762	-0.666293	APOB	Yes
L-HDL-free cholesterol	Fasting glucose / T2DM	rs12480887	20	44427418	DNTTIP1	G	A	0.116261	0.163705	-5.94526	0.37931	0	PLTP?	No
L-HDL-free cholesterol	Fasting glucose / T2DM	rs6065904	20	44534651	PLTP	A	G	0.228684	0.614885	-11.5484	-0.0204082	-2.01794	PLTP	Yes
L-HDL-free cholesterol	Fasting glucose / T2DM	rs6507939	18	47176261	LIPG(dist=56983), ACAA2(dist=133613)	A	C	0.156605	0.202265	-6.60912	-0.792453	1.00902	LIPG	Yes
L-HDL-free cholesterol	T2DM	rs247617	16	56990716	HERPUD1(dist=12923), CETP(dist=5119)	A	C	0.297517	1.51664	18.2181	NP	0.881126	CETP	Yes
L-HDL-free cholesterol	Fasting glucose	rs3764261	16	56993324	HERPUD1(dist=15531), CETP(dist=2511)	A	C	0.299047	1.50985	18.1783	-1	NP	CETP	Yes
L-HDL-free cholesterol	T2DM	rs289716	16	57009376	CETP	T	A	0.342936	0.231355	7.0693	NP	1.26684	CETP	Yes
L-HDL-free cholesterol	Fasting glucose	rs289719	16	57009941	CETP	T	C	0.333036	0.224612	6.96577	1.64286	NP	CETP	Yes
L-HDL-free cholesterol	Fasting glucose / T2DM	rs938507	15	58582034	AQP9(dist=103924), LIPC(dist=142141)	A	G	0.133957	0.215078	6.81584	-0.894737	-0.666293	LIPC	Yes
L-HDL-free cholesterol	Fasting glucose / T2DM	rs479084	15	58666087	AQP9(dist=187977), LIPC(dist=58088)	G	C	0.377442	0.220511	-6.90174	2.92683	-0.666293	LIPC	Yes
L-HDL-free cholesterol	Fasting glucose / T2DM	rs1532085	15	58683366	AQP9(dist=205256), LIPC(dist=40809)	A	G	0.401448	1.44716	17.7917	-2.89474	-1.99881	LIPC	Yes
L-HDL-free cholesterol	Fasting glucose / T2DM	rs8042174	15	58685970	AQP9(dist=207860), LIPC(dist=38205)	C	T	0.075756	0.160555	-5.88768	-0.347826	1.00902	LIPC	Yes
L-HDL-free cholesterol	Fasting glucose / T2DM	rs17821298	15	58690738	AQP9(dist=212628), LIPC(dist=33437)	A	C	0.233312	0.289695	7.91324	-1.25	0	LIPC	Yes
L-HDL-free cholesterol	Fasting glucose / T2DM	rs12912415	15	58721447	AQP9(dist=243337), LIPC(dist=2728)	G	A	0.143927	0.161404	-5.90243	0.517857	0.50213	LIPC	Yes
L-HDL-free cholesterol	Fasting glucose / T2DM	rs2070895	15	58723939	LIPC	A	G	0.244769	1.15979	15.9036	-1.5625	0	LIPC	Yes
L-HDL-free cholesterol	Fasting glucose / T2DM	rs16940472	15	58835317	LIPC	A	C	0.085554	0.203065	6.62221	-0.805556	0.403626	LIPC	Yes
L-HDL-free cholesterol	T2DM	rs11633043	15	58837722	LIPC	A	G	0.167789	0.149627	5.68282	NP	-0.459015	LIPC	Yes
L-HDL-free cholesterol	Fasting glucose / T2DM	rs1178977	7	72857049	BAZ1B	G	A	0.17151	0.147907	5.65053	0.87234	0	(NA)	No
L-HDL-free cholesterol	Fasting glucose / T2DM	rs964184	11	116648917	ZNF259	G	C	0.138224	0.161917	-5.9125	1.49057	2.01794	APOA1, APOA4, APOA5, APOC3	Yes
L-HDL-free cholesterol	Fasting glucose / T2DM	rs7298751	12	125380232	SCARB1(dist=31713), UBC(dist=15960)	G	A	0.138811	0.180056	6.23519	-0.483333	0	SCARB1	Yes
S-HDL-triglycerides	Fasting glucose	rs6511720	19	11202306	LDLR	T	G	0.102661	0.158547	-5.8507	0.617647	NP	LDLR	Yes
S-HDL-triglycerides	T2DM	rs6586884	8	19863358	LPL(dist=38588), SLC18A1(dist=139008)	C	T	0.089201	0.416719	-9.49713	NP	-0.383664	LPL	Yes
S-HDL-triglycerides	Fasting glucose	rs6999813	8	19863471	LPL(dist=38701), SLC18A1(dist=138895)	A	T	0.089239	0.416461	-9.49395	-1.56667	NP	LPL	Yes
S-HDL-triglycerides	Fasting glucose / T2DM	rs4922119	8	19874153	LPL(dist=49383), SLC18A1(dist=128213)	T	C	0.389936	0.192591	-6.44927	-2.11111	-1.52062	LPL	Yes
S-HDL-triglycerides	Fasting glucose / T2DM	rs6544366	2	21204025	C2orf43(dist=181198), APOB(dist=20276)	T	G	0.267874	0.234952	-7.1245	-0.404762	-0.666293	APOB	Yes
S-HDL-triglycerides	Fasting glucose / T2DM	rs6065904	20	44534651	PLTP	A	G	0.228686	0.27394	7.6948	-0.0204082	-2.01794	PLTP	Yes
S-HDL-triglycerides	Fasting glucose / T2DM	rs3764261	16	56993324	HERPUD1(dist=15531), CETP(dist=2511)	A	C	0.299043	0.870472	-13.7578	-1	0.666293	CETP	Yes
S-HDL-triglycerides	Fasting glucose / T2DM	rs11974409	7	72989390	TBL2	G	A	0.174832	0.195396	-6.49616	0.595745	-0.666293	MLXIPL?	No
S-HDL-triglycerides	Fasting glucose / T2DM	rs4938310	11	116629949	BUD13	T	C	0.22594	0.169427	-6.04816	1.24444	0	APOA1, APOA4, APOA5, APOC3	Yes
S-HDL-triglycerides	Fasting glucose / T2DM	rs964184	11	116648917	ZNF259	G	C	0.138226	0.923137	14.1713	1.49057	2.01794	APOA1, APOA4, APOA5, APOC3	Yes
S-HDL-triglycerides	T2DM	rs5128	11	116703640	APOC3	G	C	0.122259	0.335551	8.5187	NP	0.774523	APOA1, APOA4, APOA5, APOC3	Yes
S-HDL-triglycerides	Fasting glucose	rs6589574	11	116730638	SIK3	A	G	0.125498	0.275483	7.71615	1.2807	NP	APOA1, APOA4, APOA5, APOC3	Yes
S-HDL-triglycerides	Fasting glucose / T2DM	rs2954029	8	126490972	TRIB1(dist=40328), LINC00861(dist=443795)	T	A	0.482467	0.26362	-7.54773	0.472222	1.33896	TRIB1	No
T2DM: type 2 diabetes. MAF: minor allele frequency. Standardized effect is the t-statistic in the association analysis.
(NA): no genes confirmed by the outcome in the pathway analysis.
?: the gene in the pathway analysis is not confirmed
R2 (%): the percentage of explained variance in the exposure by genetic risk score.
NP: not performed

## Sheet: Suppl_t_6
Supplemental table 6. Mendelian randomization of fasting glucose/T2DM on metabolites (backward approach)
	Exposure: Fasting glucose					Exposure: Fasting glucose®					Exposure: T2DM
Outcome	R2 (%)	SNPs (n)	Effect	P-value	FDR	R2 (%)	SNPs (n)	Effect	P-value	FDR	R2 (%)	SNPs (n)	Effect	P-value	FDR
Lysophosphatidylcholine C14:0	1.06388	14	0.00738448	0.780961	0.981455	0.566641	5	NP	NP	NP	1.51276	32	0.027906	0.255879	0.627094
Lysophosphatidylcholine C22:0	1.10391	15	0.0387804	0.136892	0.627088	0.566641	5	NP	NP	NP	1.51276	32	0.0132274	0.590198	0.786931
Lysophosphatidylcholine acyl C16:0	1.06388	14	0.0320495	0.227493	0.761607	0.606674	6	NP	NP	NP	1.51276	32	-0.00145111	0.952887	0.972665
Lysophosphatidylcholine acyl C17:0	1.0761	14	-0.000414966	0.987469	1	0.566641	5	NP	NP	NP	1.51276	32	-0.0142761	0.561072	0.773893
Lysophosphatidylcholine acyl C18:0	1.0377	13	0.0106688	0.691371	0.981455	0.606674	6	NP	NP	NP	1.51276	32	-0.0202769	0.409049	0.663056
Lysophosphatidylcholine acyl C18:1	1.10391	15	-0.00165105	0.949505	0.986297	0.606674	6	NP	NP	NP	1.51276	32	-0.00433147	0.860015	0.955572
Lysophosphatidylcholine alkyl-acyl C16:1	1.07773	14	0.00683574	0.795474	0.981455	0.606674	6	NP	NP	NP	1.51276	32	0.00593566	0.809037	0.924613
Phosphatidylcholine alkyl-acyl C34:1	1.0377	13	-0.0444281	0.098288	0.582167	0.566641	5	NP	NP	NP	1.51276	32	-0.0117676	0.631857	0.815299
Phosphatidylcholine alkyl-acyl C34:3	1.07773	14	0.00557866	0.832465	0.981455	0.606674	6	NP	NP	NP	1.51276	32	0.0103733	0.672772	0.840965
Phosphatidylcholine alkyl-acyl C36:2	1.0377	13	-0.0464731	0.0837536	0.582167	0.566641	5	NP	NP	NP	1.51276	32	-0.00246164	0.920166	0.961856
Phosphatidylcholine alkyl-acyl C36:2	1.03559	13	0.0330154	0.21945	0.761607	0.606674	6	NP	NP	NP	1.51276	32	-0.0367042	0.13507	0.516746
Phosphatidylcholine alkyl-acyl C36:3	1.0377	13	0.00778468	0.772064	0.981455	0.566641	5	NP	NP	NP	1.51276	32	-0.00228781	0.925786	0.961856
Phosphatidylcholine alkyl-acyl C40:3	1.06177	14	0.00395153	0.881765	0.981455	0.56453	5	NP	NP	NP	1.51276	32	-0.0603342	0.01403	0.1403
Phosphatidylcholine alkyl-acyl C42:3	1.06177	14	0.0176836	0.505669	0.981455	0.56453	5	NP	NP	NP	1.47801	31	-0.0476921	0.0543623	0.362416
Phosphatidylcholine alkyl-acyl C42:4	1.03559	13	0.0285475	0.288323	0.834339	0.56453	5	NP	NP	NP	1.51276	32	-0.0683114	0.00541443	0.0721925
Phosphatidylcholine alkyl-acyl C42:5	0.825713	13	0.053672	0.0746262	NA	0.354652	5	NP	NP	NP	1.51276	32	-0.0845648	0.000575221	0.0229607
Phosphatidylcholine alkyl-acyl C44:3	1.10391	15	0.00227482	0.93047	0.981455	0.606674	6	NP	NP	NP	1.51276	32	-0.0481841	0.0497851	0.362073
Phosphatidylcholine alkyl-acyl C44:4	1.10391	15	0.0216103	0.407169	0.914006	0.606674	6	NP	NP	NP	1.51276	32	-0.0827519	0.000753802	0.0229607
Phosphatidylcholine alkyl-acyl C44:5	0.95438	13	NP	NP	NP	0.48332	5	NP	NP	NP	1.48112	31	-0.0534907	0.0329241	0.292659
Phosphatidylcholine alkyl-acyl C44:6	1.07773	14	0.00348949	0.894731	0.981455	0.606674	6	NP	NP	NP	1.51276	32	-0.071821	0.00345369	0.0690739
Phosphatidylcholine diacyl C32:1	1.06388	14	-0.00721145	0.785967	0.981455	0.566641	5	NP	NP	NP	1.51276	32	-0.0222256	0.365513	0.663056
Phosphatidylcholine diacyl C34:4	1.00989	12	-0.0109076	0.689025	0.981455	0.566641	5	NP	NP	NP	1.51276	32	0.0144107	0.557387	0.773893
Phosphatidylcholine diacyl C34:4	1.0377	13	0.0465188	0.0834503	0.582167	0.566641	5	NP	NP	NP	1.44302	30	0.00123908	0.960507	0.972665
Phosphatidylcholine diacyl C36:1	1.10391	15	-0.0237371	0.362578	0.914006	0.606674	6	NP	NP	NP	1.51276	32	0.00819903	0.738514	0.856248
Phosphatidylcholine diacyl C38:3	1.0377	13	-0.013658	0.611293	0.981455	0.566641	5	NP	NP	NP	1.51276	32	-0.0307508	0.210565	0.623896
Phosphatidylcholine diacyl C38:3	1.06388	14	0.0720106	0.00669597	0.480299	0.566641	5	NP	NP	NP	1.51276	32	-0.0155087	0.527757	0.767647
Phosphatidylcholine diacyl C38:4	1.04992	13	-0.0148024	0.579778	0.981455	0.606674	6	NP	NP	NP	1.48112	31	-0.0204574	0.414635	0.663056
Phosphatidylcholine diacyl C38:4	1.07773	14	0.049127	0.0624785	0.534539	0.606674	6	NP	NP	NP	1.48065	31	-0.00300377	0.903307	0.961856
Phosphatidylcholine diacyl C40:4	0.872203	11	NP	NP	NP	0.401142	3	NP	NP	NP	1.51276	32	-0.035549	0.147794	0.516746
Phosphatidylcholine diacyl C40:6	1.07773	14	0.020473	0.437555	0.914006	0.566641	5	NP	NP	NP	1.51276	32	-0.00928763	0.705324	0.844826
Phosphatidylcholine diacyl C42:0	1.03559	13	0.0150884	0.574657	0.981455	0.56453	5	NP	NP	NP	1.51276	32	-0.0686389	0.00519611	0.0721925
Phosphatidylethanolamine C32:2	1.07773	14	-0.0130713	0.620135	0.981455	0.606674	6	NP	NP	NP	1.51276	32	0.00886648	0.718102	0.844826
Phosphatidylethanolamine C38:4	1.07773	14	0.0162048	0.538896	0.981455	0.606674	6	NP	NP	NP	1.51276	32	-0.0132781	0.588772	0.786931
Phosphatidylethanolamine C40:4	1.10391	15	0.0122705	0.637893	0.981455	0.606674	6	NP	NP	NP	1.51276	32	-0.0127034	0.605004	0.793448
Phosphatidylethanolamine alkyl-acyl C38:7	1.10391	15	0.00681324	0.793839	0.981455	0.606674	6	NP	NP	NP	1.51276	32	-0.0366788	0.135341	0.516746
Alanine	1.06388	14	0.0624397	0.0187129	0.480299	0.566641	5	NP	NP	NP	1.48457	31	0.082421	0.000861025	0.0229607
Isoleucine	1.06388	14	0.00594098	0.822982	0.981455	0.566641	5	NP	NP	NP	1.51276	32	0.0434325	0.0770032	0.472071
Leucine	1.06388	14	0.0276669	0.297499	0.834339	0.566641	5	NP	NP	NP	1.51276	32	0.0361665	0.140883	0.516746
Phenylalanine	1.10391	15	-0.0433366	0.0964677	0.582167	0.606674	6	NP	NP	NP	1.51276	32	-0.00967086	0.693768	0.844826
Tyrosine	1.04139	13	0.00569138	0.832124	0.981455	0.578767	5	NP	NP	NP	1.45294	30	0.0359213	0.155024	0.516746
Valine	1.06388	14	0.0573136	0.0309142	0.529318	0.566641	5	NP	NP	NP	1.48457	31	0.0653339	0.00825309	0.0943211
Valine	1.10391	15	0.0226871	0.384197	0.914006	0.606674	6	NP	NP	NP	1.51276	32	0.0507258	0.0388957	0.311166
Glycerol	1.06388	14	0.00704606	0.79076	0.981455	0.566641	5	NP	NP	NP	1.51276	32	0.0055677	0.820667	0.924695
Lactate	1.0377	13	-0.0357798	0.183057	0.761607	0.566641	5	NP	NP	NP	1.51276	32	0.00909394	0.71119	0.844826
Pyruvate_Oxaloacetate	1.06388	14	0.030548	0.25002	0.784778	0.566641	5	NP	NP	NP	1.51276	32	0.0342784	0.162823	0.521034
Triglycerides(46:0)	1.06388	14	-0.00242673	0.927191	0.981455	0.566641	5	NP	NP	NP	1.44645	30	-0.0393113	0.123149	0.516746
Triglycerides(46:1)	1.06388	14	-0.0205428	0.439198	0.914006	0.566641	5	NP	NP	NP	1.47449	31	-0.002496	0.920036	0.961856
Triglycerides(48:0)	1.06388	14	0.011774	0.657509	0.981455	0.566641	5	NP	NP	NP	1.44645	30	-0.0212056	0.405619	0.663056
Triglycerides(48:1)	1.06388	14	-0.00538974	0.839171	0.981455	0.566641	5	NP	NP	NP	1.47398	31	-0.0251225	0.31931	0.654995
Triglycerides(48:2)	1.06388	14	-0.00805143	0.761752	0.981455	0.566641	5	NP	NP	NP	1.47398	31	-0.0241659	0.338085	0.659678
Triglycerides(48:3)	1.06388	14	0.00309906	0.9071	0.981455	0.566641	5	NP	NP	NP	1.51276	32	-0.0197786	0.420657	0.663056
Triglycerides(50:0)	1.06388	14	0.0119114	0.653769	0.981455	0.566641	5	NP	NP	NP	1.43571	30	-0.030359	0.234827	0.627094
Triglycerides(50:1)	1.06388	14	0.0159246	0.54874	0.981455	0.566641	5	NP	NP	NP	1.47398	31	-0.0233665	0.354308	0.663056
Triglycerides(50:2)	1.03607	13	-0.00317216	0.906218	0.981455	0.566641	5	NP	NP	NP	1.47398	31	-0.029328	0.244998	0.627094
Triglycerides(50:3)	1.06388	14	0.014337	0.589289	0.981455	0.566641	5	NP	NP	NP	1.45428	31	-0.0272751	0.275442	0.627094
Triglycerides(50:4)	1.06388	14	0.0153515	0.563218	0.981455	0.566641	5	NP	NP	NP	1.51276	32	-0.0225232	0.359128	0.663056
Triglycerides(51:1)	1.06388	14	-0.00369238	0.88942	0.981455	0.566641	5	NP	NP	NP	1.47398	31	-0.0418317	0.0972685	0.516746
Triglycerides(52:1)	1.06388	14	-0.00130927	0.960679	0.986297	0.566641	5	NP	NP	NP	1.47398	31	-0.0330271	0.19046	0.58603
Triglycerides(53:1)	1.06388	14	-0.0051612	0.845903	0.981455	0.566641	5	NP	NP	NP	1.51276	32	-0.0165901	0.499382	0.739825
Triglycerides(54:1)	1.06388	14	0.00574248	0.828804	0.981455	0.566641	5	NP	NP	NP	1.51276	32	-0.00307698	0.900303	0.961856
Triglycerides(54:7)	1.0377	13	0.0213499	0.426933	0.914006	0.566641	5	NP	NP	NP	1.45428	31	-0.0263512	0.292033	0.627094
Plasma-Triglycerides	1.06388	14	-0.0507451	0.0560257	0.534539	0.566641	5	NP	NP	NP	1.51276	32	0.0259675	0.290393	0.627094
XXL-VLDL-phospholipids	1.0377	13	-0.0336569	0.210423	0.761607	0.566641	5	NP	NP	NP	1.51276	32	0.0196918	0.422698	0.663056
XXL-VLDL-triglycerides	1.0377	13	-0.0144801	0.590012	0.981455	0.566641	5	NP	NP	NP	1.51276	32	0.0353877	0.149641	0.516746
M-VLDL-triglycerides	1.0377	13	-0.0513075	0.0562359	0.534539	0.566641	5	NP	NP	NP	1.51276	32	0.0185094	0.451086	0.693978
S-VLDL-triglycerides	1.0377	13	-0.0398161	0.138448	0.627088	0.566641	5	NP	NP	NP	1.51276	32	0.0275804	0.261467	0.627094
XS-VLDL-phospholipids	1.07773	14	-0.0494044	0.0610131	0.534539	0.606674	6	NP	NP	NP	1.51276	32	0.0291909	0.234636	0.627094
XS-VLDL-triglycerides	1.06388	14	-0.0418736	0.114848	0.627088	0.566641	5	NP	NP	NP	1.51276	32	0.0207042	0.399247	0.663056
IDL-phospholipids	1.0377	13	-0.0276579	0.303396	0.834339	0.566641	5	NP	NP	NP	1.51276	32	0.0255684	0.297869	0.627094
IDL-Triglycerides	1.0377	13	-0.0326107	0.224949	0.761607	0.566641	5	NP	NP	NP	1.51276	32	0.0236943	0.334691	0.659678
L-LDL-Free cholesterol	1.07773	14	-0.0400878	0.128481	0.627088	0.606674	6	NP	NP	NP	1.51276	32	0.0175926	0.473819	0.715198
XS-LDL-cholesterol	1.06388	14	-0.0302418	0.254798	0.784778	0.566641	5	NP	NP	NP	1.51276	32	0.0200521	0.414262	0.663056
HDL-cholesterol	1.07773	14	0.018329	0.487036	0.981455	0.606674	6	NP	NP	NP	1.51276	32	-0.0362301	0.140186	0.516746
XL-HDL-cholesterol	1.07773	14	0.0234902	0.373068	0.914006	0.606674	6	NP	NP	NP	1.51276	32	-0.0113297	0.644595	0.818533
XL-HDL-Free cholesterol	1.07773	14	0.0255874	0.331914	0.881288	0.606674	6	NP	NP	NP	1.51276	32	-0.026939	0.272722	0.627094
XL-HDL-phospholipids	1.07773	14	0.0342203	0.194416	0.761607	0.606674	6	NP	NP	NP	1.51276	32	-0.0257304	0.29482	0.627094
L-HDL-cholesterol	1.04489	13	0.0632323	0.0182983	0.480299	0.606674	6	NP	NP	NP	1.51276	32	-0.0398046	0.105096	0.516746
L-HDL-Free cholesterol	1.0377	13	0.0208025	0.438883	0.914006	0.566641	5	NP	NP	NP	1.51276	32	-0.0426313	0.0826124	0.472071
S-HDL-triglycerides	1.06388	14	-0.0561853	0.0343713	0.529318	0.566641	5	NP	NP	NP	1.51276	32	0.0144427	0.556512	0.773893
® Pathway based sensitivity analysis
T2DM: type 2 diabetes.
FDR: false discovery rate
NP: not performed.
R2 (%): the percentage of explained variance in the exposure by genetic risk score.
As the genetic risk scores of the glucose explained less than 1% of variance, the backward MR with pathway analysis is not performed.

## Sheet: Suppl_t_7
Supplemental table 7. SNP lists included in exposure genetic risk score in Mendelian randomization of fasting glucose/T2DM on metabolites (backward approach)
										Fasting glucose		T2DM
Outcome: Metabolite	Exposure	SNPs included in GRS	Chr	Position	Nearest gene	Effect allele	Non-effect allele	MAF	Standardized effect in outcome GWAS	R2(%) in in exposure GWAS (fasting glucose)	Standardized effect in exposure GWAS (fasting glucose)	R2(%) in exposure GWAS (T2DM)	Standardized effect in exposure GWAS (T2DM)	Involved gene in pathway(Fasting glucose)	Confirmed by pathway
Lysophosphatidylcholine 14:0	Fasting glucose	rs853770	2	169749841	SPC25(dist=2897), G6PC2(dist=7909)	T	C	0.3056	0.577465	0.0421445	7.38095	NP	NP	G6PC2	Yes
Lysophosphatidylcholine 14:0	Fasting glucose	rs560887	2	169763148	G6PC2	T	C	0.3097	0.44484	0.252022	-18.2927	NP	NP	G6PC2	Yes
Lysophosphatidylcholine 14:0	Fasting glucose	rs6709087	2	169799010	ABCB11	A	G	0.7996	-0.253086	0.123354	-12.8	NP	NP	G6PC2	Yes
Lysophosphatidylcholine 14:0	Fasting glucose	rs11717195	3	123082398	ADCY5	T	C	0.7249	0.391892	0.0279066	6.17021	NP	NP	ADCY5	Yes
Lysophosphatidylcholine 14:0	Fasting glucose	rs10276674	7	14922007	DGKB(dist=40932), AGMO(dist=317936)	T	C	0.8216	-0.710425	0.0373884	-7.05882	NP	NP	DGKB (phospholipid mediated)	No
Lysophosphatidylcholine 14:0	Fasting glucose	rs2191349	7	15064309	DGKB(dist=183234), AGMO(dist=175634)	T	G	0.5372	-1.17588	0.0521899	8.33333	NP	NP	DGKB?	No
Lysophosphatidylcholine 14:0	Fasting glucose	rs6975024	7	44231886	GCK(dist=2864), YKT6(dist=8692)	T	C	0.8177	-1.36293	0.121213	-12.6531	NP	NP	GCK	Yes
Lysophosphatidylcholine 14:0	Fasting glucose	rs11558471	8	118185733	SLC30A8	A	G	0.6689	-0.692661	0.0334041	6.75	NP	NP	SLC30A8	No
Lysophosphatidylcholine 14:0	Fasting glucose	rs10787312	10	113023966	ADRA2A(dist=183304), GPAM(dist=885656)	A	G	0.9066	-1.63401	0.0346173	6.77419	NP	NP	ADRA2A	No
Lysophosphatidylcholine 14:0	Fasting glucose	rs12805422	11	45839889	SLC35C1(dist=5322), CRY2(dist=28780)	A	G	0.5763	-2.57282	0.027813	-6.21622	NP	NP	CRY2, MAPK8IP1	No
Lysophosphatidylcholine 14:0	Fasting glucose	rs2524299	11	61604782	FADS2	A	T	0.8773	0.371795	0.0261766	5.76923	NP	NP	FADS2 (lipid mediated)	No
Lysophosphatidylcholine 14:0	Fasting glucose	rs7102746	11	92666563	FAT3(dist=36928), MTNR1B(dist=36226)	T	C	0.4652	0.57554	0.0328408	-6.74419	NP	NP	MTNR1B	No
Lysophosphatidylcholine 14:0	Fasting glucose	rs10830963	11	92708710	MTNR1B	C	G	0.7304	0.476	0.229908	-17.5556	NP	NP	MTNR1B	No
Lysophosphatidylcholine 14:0	Fasting glucose	rs17390909	12	97868654	RMST	C	G	0.9028	1.09945	0.0228987	5.52239	NP	NP	(NA)	No
Lysophosphatidylcholine 16:0	Fasting glucose	rs853770	2	169749841	SPC25(dist=2897), G6PC2(dist=7909)	T	C	0.3058	-1.04545	0.0421445	7.38095	NP	NP	G6PC2	Yes
Lysophosphatidylcholine 16:0	Fasting glucose	rs560887	2	169763148	G6PC2	T	C	0.3247	1.65116	0.252022	-18.2927	NP	NP	G6PC2	Yes
Lysophosphatidylcholine 16:0	Fasting glucose	rs6709087	2	169799010	ABCB11	A	G	0.7916	0.784314	0.123354	-12.8	NP	NP	G6PC2	Yes
Lysophosphatidylcholine 16:0	Fasting glucose	rs11717195	3	123082398	ADCY5	T	C	0.7634	1	0.0279066	6.17021	NP	NP	ADCY5	Yes
Lysophosphatidylcholine 16:0	Fasting glucose	rs10276674	7	14922007	DGKB(dist=40932), AGMO(dist=317936)	T	C	0.8273	-1.18519	0.0373884	-7.05882	NP	NP	DGKB (phospholipid mediated)	No
Lysophosphatidylcholine 16:0	Fasting glucose	rs2191349	7	15064309	DGKB(dist=183234), AGMO(dist=175634)	T	G	0.5384	0.560976	0.0521899	8.33333	NP	NP	DGKB?	No
Lysophosphatidylcholine 16:0	Fasting glucose	rs6975024	7	44231886	GCK(dist=2864), YKT6(dist=8692)	T	C	0.833	-1	0.121213	-12.6531	NP	NP	GCK	Yes
Lysophosphatidylcholine 16:0	Fasting glucose	rs11558471	8	118185733	SLC30A8	A	G	0.6811	1.25	0.0334041	6.75	NP	NP	SLC30A8	No
Lysophosphatidylcholine 16:0	Fasting glucose	rs10787312	10	113023966	ADRA2A(dist=183304), GPAM(dist=885656)	A	G	0.892	1.41176	0.0346173	6.77419	NP	NP	ADRA2A	No
Lysophosphatidylcholine 16:0	Fasting glucose	rs12805422	11	45839889	SLC35C1(dist=5322), CRY2(dist=28780)	A	G	0.5598	-0.333333	0.027813	-6.21622	NP	NP	CRY2, MAPK8IP1	No
Lysophosphatidylcholine 16:0	Fasting glucose	rs2524299	11	61604782	FADS2	A	T	0.8773	2.88889	0.0261766	5.76923	NP	NP	FADS2 (lipid mediated)	No
Lysophosphatidylcholine 16:0	Fasting glucose	rs7102746	11	92666563	FAT3(dist=36928), MTNR1B(dist=36226)	T	C	0.4742	-0.313725	0.0328408	-6.74419	NP	NP	MTNR1B	No
Lysophosphatidylcholine 16:0	Fasting glucose	rs10830963	11	92708710	MTNR1B	C	G	0.7243	-0.836735	0.229908	-17.5556	NP	NP	MTNR1B	No
Lysophosphatidylcholine 16:0	Fasting glucose	rs17390909	12	97868654	RMST	C	G	0.8937	1.44776	0.0228987	5.52239	NP	NP	(NA)	No
Lysophosphatidylcholine 17:0	Fasting glucose	rs780093	2	27742603	GCKR	T	C	0.374	2.07273	0.0400332	-7.2973	NP	NP	GCKR	Yes
Lysophosphatidylcholine 17:0	Fasting glucose	rs853770	2	169749841	SPC25(dist=2897), G6PC2(dist=7909)	T	C	0.3032	-0.75	0.0421445	7.38095	NP	NP	G6PC2	Yes
Lysophosphatidylcholine 17:0	Fasting glucose	rs560887	2	169763148	G6PC2	T	C	0.3223	1.84483	0.252022	-18.2927	NP	NP	G6PC2	Yes
Lysophosphatidylcholine 17:0	Fasting glucose	rs6709087	2	169799010	ABCB11	A	G	0.793	0.73913	0.123354	-12.8	NP	NP	G6PC2	Yes
Lysophosphatidylcholine 17:0	Fasting glucose	rs11717195	3	123082398	ADCY5	T	C	0.7618	1.40299	0.0279066	6.17021	NP	NP	ADCY5	Yes
Lysophosphatidylcholine 17:0	Fasting glucose	rs10276674	7	14922007	DGKB(dist=40932), AGMO(dist=317936)	T	C	0.8271	-1.20548	0.0373884	-7.05882	NP	NP	DGKB (phospholipid mediated)	No
Lysophosphatidylcholine 17:0	Fasting glucose	rs2191349	7	15064309	DGKB(dist=183234), AGMO(dist=175634)	T	G	0.5373	0.436364	0.0521899	8.33333	NP	NP	DGKB?	No
Lysophosphatidylcholine 17:0	Fasting glucose	rs6975024	7	44231886	GCK(dist=2864), YKT6(dist=8692)	T	C	0.8334	-0.126761	0.121213	-12.6531	NP	NP	GCK	Yes
Lysophosphatidylcholine 17:0	Fasting glucose	rs11558471	8	118185733	SLC30A8	A	G	0.6791	0.915254	0.0334041	6.75	NP	NP	SLC30A8	No
Lysophosphatidylcholine 17:0	Fasting glucose	rs10787312	10	113023966	ADRA2A(dist=183304), GPAM(dist=885656)	A	G	0.8931	1.3913	0.0346173	6.77419	NP	NP	ADRA2A	No
Lysophosphatidylcholine 17:0	Fasting glucose	rs2524299	11	61604782	FADS2	A	T	0.8739	2.07143	0.0261766	5.76923	NP	NP	FADS2 (lipid mediated)	No
Lysophosphatidylcholine 17:0	Fasting glucose	rs7102746	11	92666563	FAT3(dist=36928), MTNR1B(dist=36226)	T	C	0.4764	0.0945946	0.0328408	-6.74419	NP	NP	MTNR1B	No
Lysophosphatidylcholine 17:0	Fasting glucose	rs10830963	11	92708710	MTNR1B	C	G	0.7235	-0.573529	0.229908	-17.5556	NP	NP	MTNR1B	No
Lysophosphatidylcholine 17:0	Fasting glucose	rs17390909	12	97868654	RMST	C	G	0.8943	0.703297	0.0228987	5.52239	NP	NP	(NA)	No
Lysophosphatidylcholine 18:0	Fasting glucose	rs853770	2	169749841	SPC25(dist=2897), G6PC2(dist=7909)	T	C	0.3042	-1.55769	0.0421445	7.38095	NP	NP	G6PC2	Yes
Lysophosphatidylcholine 18:0	Fasting glucose	rs560887	2	169763148	G6PC2	T	C	0.3241	2.06	0.252022	-18.2927	NP	NP	G6PC2	Yes
Lysophosphatidylcholine 18:0	Fasting glucose	rs6709087	2	169799010	ABCB11	A	G	0.7917	0.966102	0.123354	-12.8	NP	NP	G6PC2	Yes
Lysophosphatidylcholine 18:0	Fasting glucose	rs11717195	3	123082398	ADCY5	T	C	0.7621	1.25862	0.0279066	6.17021	NP	NP	ADCY5	Yes
Lysophosphatidylcholine 18:0	Fasting glucose	rs10276674	7	14922007	DGKB(dist=40932), AGMO(dist=317936)	T	C	0.8273	-1.52381	0.0373884	-7.05882	NP	NP	DGKB (phospholipid mediated)	No
Lysophosphatidylcholine 18:0	Fasting glucose	rs2191349	7	15064309	DGKB(dist=183234), AGMO(dist=175634)	T	G	0.5383	0.574468	0.0521899	8.33333	NP	NP	DGKB?	No
Lysophosphatidylcholine 18:0	Fasting glucose	rs6975024	7	44231886	GCK(dist=2864), YKT6(dist=8692)	T	C	0.8328	-0.721311	0.121213	-12.6531	NP	NP	GCK	Yes
Lysophosphatidylcholine 18:0	Fasting glucose	rs11558471	8	118185733	SLC30A8	A	G	0.6813	2.06	0.0334041	6.75	NP	NP	SLC30A8	No
Lysophosphatidylcholine 18:0	Fasting glucose	rs10787312	10	113023966	ADRA2A(dist=183304), GPAM(dist=885656)	A	G	0.8922	1.01266	0.0346173	6.77419	NP	NP	ADRA2A	No
Lysophosphatidylcholine 18:0	Fasting glucose	rs12805422	11	45839889	SLC35C1(dist=5322), CRY2(dist=28780)	A	G	0.5596	-0.102041	0.027813	-6.21622	NP	NP	CRY2, MAPK8IP1	No
Lysophosphatidylcholine 18:0	Fasting glucose	rs7102746	11	92666563	FAT3(dist=36928), MTNR1B(dist=36226)	T	C	0.4726	-0.42623	0.0328408	-6.74419	NP	NP	MTNR1B	No
Lysophosphatidylcholine 18:0	Fasting glucose	rs10830963	11	92708710	MTNR1B	C	G	0.724	-1	0.229908	-17.5556	NP	NP	MTNR1B	No
Lysophosphatidylcholine 18:0	Fasting glucose	rs17390909	12	97868654	RMST	C	G	0.8936	0.371795	0.0228987	5.52239	NP	NP	(NA)	No
Lysophosphatidylcholine 18:1	Fasting glucose	rs780093	2	27742603	GCKR	T	C	0.3775	2.81132	0.0400332	-7.2973	NP	NP	GCKR	Yes
Lysophosphatidylcholine 18:1	Fasting glucose	rs853770	2	169749841	SPC25(dist=2897), G6PC2(dist=7909)	T	C	0.3038	0.12069	0.0421445	7.38095	NP	NP	G6PC2	Yes
Lysophosphatidylcholine 18:1	Fasting glucose	rs560887	2	169763148	G6PC2	T	C	0.323	0.928571	0.252022	-18.2927	NP	NP	G6PC2	Yes
Lysophosphatidylcholine 18:1	Fasting glucose	rs6709087	2	169799010	ABCB11	A	G	0.7918	1.36364	0.123354	-12.8	NP	NP	G6PC2	Yes
Lysophosphatidylcholine 18:1	Fasting glucose	rs11717195	3	123082398	ADCY5	T	C	0.7661	1.47692	0.0279066	6.17021	NP	NP	ADCY5	Yes
Lysophosphatidylcholine 18:1	Fasting glucose	rs10276674	7	14922007	DGKB(dist=40932), AGMO(dist=317936)	T	C	0.8275	-0.871429	0.0373884	-7.05882	NP	NP	DGKB (phospholipid mediated)	No
Lysophosphatidylcholine 18:1	Fasting glucose	rs2191349	7	15064309	DGKB(dist=183234), AGMO(dist=175634)	T	G	0.5376	0.403846	0.0521899	8.33333	NP	NP	DGKB?	No
Lysophosphatidylcholine 18:1	Fasting glucose	rs6975024	7	44231886	GCK(dist=2864), YKT6(dist=8692)	T	C	0.8334	-0.661765	0.121213	-12.6531	NP	NP	GCK	Yes
Lysophosphatidylcholine 18:1	Fasting glucose	rs11558471	8	118185733	SLC30A8	A	G	0.6795	0.464286	0.0334041	6.75	NP	NP	SLC30A8	No
Lysophosphatidylcholine 18:1	Fasting glucose	rs10787312	10	113023966	ADRA2A(dist=183304), GPAM(dist=885656)	A	G	0.8931	1.48864	0.0346173	6.77419	NP	NP	ADRA2A	No
Lysophosphatidylcholine 18:1	Fasting glucose	rs12805422	11	45839889	SLC35C1(dist=5322), CRY2(dist=28780)	A	G	0.5617	0.5	0.027813	-6.21622	NP	NP	CRY2, MAPK8IP1	No
Lysophosphatidylcholine 18:1	Fasting glucose	rs2524299	11	61604782	FADS2	A	T	0.8753	-0.2	0.0261766	5.76923	NP	NP	FADS2 (lipid mediated)	No
Lysophosphatidylcholine 18:1	Fasting glucose	rs7102746	11	92666563	FAT3(dist=36928), MTNR1B(dist=36226)	T	C	0.4737	-0.0142857	0.0328408	-6.74419	NP	NP	MTNR1B	No
Lysophosphatidylcholine 18:1	Fasting glucose	rs10830963	11	92708710	MTNR1B	C	G	0.7245	-0.630769	0.229908	-17.5556	NP	NP	MTNR1B	No
Lysophosphatidylcholine 18:1	Fasting glucose	rs17390909	12	97868654	RMST	C	G	0.8946	0.816092	0.0228987	5.52239	NP	NP	(NA)	No
Lysophosphatidylcholine 22:0	Fasting glucose	rs780093	2	27742603	GCKR	T	C	0.3553	2.21399	0.0400332	-7.2973	NP	NP	GCKR	Yes
Lysophosphatidylcholine 22:0	Fasting glucose	rs853770	2	169749841	SPC25(dist=2897), G6PC2(dist=7909)	T	C	0.3057	-0.215909	0.0421445	7.38095	NP	NP	G6PC2	Yes
Lysophosphatidylcholine 22:0	Fasting glucose	rs560887	2	169763148	G6PC2	T	C	0.3106	-1.38403	0.252022	-18.2927	NP	NP	G6PC2	Yes
Lysophosphatidylcholine 22:0	Fasting glucose	rs6709087	2	169799010	ABCB11	A	G	0.799	1.62136	0.123354	-12.8	NP	NP	G6PC2	Yes
Lysophosphatidylcholine 22:0	Fasting glucose	rs11717195	3	123082398	ADCY5	T	C	0.726	0.434932	0.0279066	6.17021	NP	NP	ADCY5	Yes
Lysophosphatidylcholine 22:0	Fasting glucose	rs10276674	7	14922007	DGKB(dist=40932), AGMO(dist=317936)	T	C	0.8214	0.762215	0.0373884	-7.05882	NP	NP	DGKB (phospholipid mediated)	No
Lysophosphatidylcholine 22:0	Fasting glucose	rs2191349	7	15064309	DGKB(dist=183234), AGMO(dist=175634)	T	G	0.5367	2.02521	0.0521899	8.33333	NP	NP	DGKB?	No
Lysophosphatidylcholine 22:0	Fasting glucose	rs6975024	7	44231886	GCK(dist=2864), YKT6(dist=8692)	T	C	0.8169	0.33887	0.121213	-12.6531	NP	NP	GCK	Yes
Lysophosphatidylcholine 22:0	Fasting glucose	rs11558471	8	118185733	SLC30A8	A	G	0.6711	0.667969	0.0334041	6.75	NP	NP	SLC30A8	No
Lysophosphatidylcholine 22:0	Fasting glucose	rs10787312	10	113023966	ADRA2A(dist=183304), GPAM(dist=885656)	A	G	0.9064	1.26136	0.0346173	6.77419	NP	NP	ADRA2A	No
Lysophosphatidylcholine 22:0	Fasting glucose	rs12805422	11	45839889	SLC35C1(dist=5322), CRY2(dist=28780)	A	G	0.5766	-0.254167	0.027813	-6.21622	NP	NP	CRY2, MAPK8IP1	No
Lysophosphatidylcholine 22:0	Fasting glucose	rs2524299	11	61604782	FADS2	A	T	0.8773	1.5816	0.0261766	5.76923	NP	NP	FADS2 (lipid mediated)	No
Lysophosphatidylcholine 22:0	Fasting glucose	rs7102746	11	92666563	FAT3(dist=36928), MTNR1B(dist=36226)	T	C	0.4662	-1.69393	0.0328408	-6.74419	NP	NP	MTNR1B	No
Lysophosphatidylcholine 22:0	Fasting glucose	rs10830963	11	92708710	MTNR1B	C	G	0.731	-0.962329	0.229908	-17.5556	NP	NP	MTNR1B	No
Lysophosphatidylcholine 22:0	Fasting glucose	rs17390909	12	97868654	RMST	C	G	0.9019	1.49756	0.0228987	5.52239	NP	NP	(NA)	No
Lysophosphatidylcholine alkyl-acyl 16:1	Fasting glucose	rs780093	2	27742603	GCKR	T	C	0.3547	-2.22857	0.0400332	-7.2973	NP	NP	GCKR	Yes
Lysophosphatidylcholine alkyl-acyl 16:1	Fasting glucose	rs853770	2	169749841	SPC25(dist=2897), G6PC2(dist=7909)	T	C	0.3057	-0.748227	0.0421445	7.38095	NP	NP	G6PC2	Yes
Lysophosphatidylcholine alkyl-acyl 16:1	Fasting glucose	rs560887	2	169763148	G6PC2	T	C	0.3094	-0.821306	0.252022	-18.2927	NP	NP	G6PC2	Yes
Lysophosphatidylcholine alkyl-acyl 16:1	Fasting glucose	rs6709087	2	169799010	ABCB11	A	G	0.7994	-0.24	0.123354	-12.8	NP	NP	G6PC2	Yes
Lysophosphatidylcholine alkyl-acyl 16:1	Fasting glucose	rs11717195	3	123082398	ADCY5	T	C	0.7246	0.0275229	0.0279066	6.17021	NP	NP	ADCY5	Yes
Lysophosphatidylcholine alkyl-acyl 16:1	Fasting glucose	rs10276674	7	14922007	DGKB(dist=40932), AGMO(dist=317936)	T	C	0.8214	0.417625	0.0373884	-7.05882	NP	NP	DGKB (phospholipid mediated)	No
Lysophosphatidylcholine alkyl-acyl 16:1	Fasting glucose	rs2191349	7	15064309	DGKB(dist=183234), AGMO(dist=175634)	T	G	0.5372	-0.199005	0.0521899	8.33333	NP	NP	DGKB?	No
Lysophosphatidylcholine alkyl-acyl 16:1	Fasting glucose	rs6975024	7	44231886	GCK(dist=2864), YKT6(dist=8692)	T	C	0.818	0.744186	0.121213	-12.6531	NP	NP	GCK	Yes
Lysophosphatidylcholine alkyl-acyl 16:1	Fasting glucose	rs11558471	8	118185733	SLC30A8	A	G	0.6686	0.306977	0.0334041	6.75	NP	NP	SLC30A8	No
Lysophosphatidylcholine alkyl-acyl 16:1	Fasting glucose	rs10787312	10	113023966	ADRA2A(dist=183304), GPAM(dist=885656)	A	G	0.9065	-2.0546	0.0346173	6.77419	NP	NP	ADRA2A	No
Lysophosphatidylcholine alkyl-acyl 16:1	Fasting glucose	rs12805422	11	45839889	SLC35C1(dist=5322), CRY2(dist=28780)	A	G	0.5762	-1.15347	0.027813	-6.21622	NP	NP	CRY2, MAPK8IP1	No
Lysophosphatidylcholine alkyl-acyl 16:1	Fasting glucose	rs7102746	11	92666563	FAT3(dist=36928), MTNR1B(dist=36226)	T	C	0.4652	-1.82374	0.0328408	-6.74419	NP	NP	MTNR1B	No
Lysophosphatidylcholine alkyl-acyl 16:1	Fasting glucose	rs10830963	11	92708710	MTNR1B	C	G	0.7312	1.18972	0.229908	-17.5556	NP	NP	MTNR1B	No
Lysophosphatidylcholine alkyl-acyl 16:1	Fasting glucose	rs17390909	12	97868654	RMST	C	G	0.9028	1.46832	0.0228987	5.52239	NP	NP	(NA)	No
Phosphatidylcholine alkyl-acyl 34:1	Fasting glucose	rs853770	2	169749841	SPC25(dist=2897), G6PC2(dist=7909)	T	C	0.3058	-0.175182	0.0421445	7.38095	NP	NP	G6PC2	Yes
Phosphatidylcholine alkyl-acyl 34:1	Fasting glucose	rs560887	2	169763148	G6PC2	T	C	0.3096	1.1087	0.252022	-18.2927	NP	NP	G6PC2	Yes
Phosphatidylcholine alkyl-acyl 34:1	Fasting glucose	rs6709087	2	169799010	ABCB11	A	G	0.8	1.76282	0.123354	-12.8	NP	NP	G6PC2	Yes
Phosphatidylcholine alkyl-acyl 34:1	Fasting glucose	rs11717195	3	123082398	ADCY5	T	C	0.7252	1.71362	0.0279066	6.17021	NP	NP	ADCY5	Yes
Phosphatidylcholine alkyl-acyl 34:1	Fasting glucose	rs10276674	7	14922007	DGKB(dist=40932), AGMO(dist=317936)	T	C	0.8214	-0.307393	0.0373884	-7.05882	NP	NP	DGKB (phospholipid mediated)	No
Phosphatidylcholine alkyl-acyl 34:1	Fasting glucose	rs2191349	7	15064309	DGKB(dist=183234), AGMO(dist=175634)	T	G	0.5373	1.17617	0.0521899	8.33333	NP	NP	DGKB?	No
Phosphatidylcholine alkyl-acyl 34:1	Fasting glucose	rs6975024	7	44231886	GCK(dist=2864), YKT6(dist=8692)	T	C	0.8177	0.104418	0.121213	-12.6531	NP	NP	GCK	Yes
Phosphatidylcholine alkyl-acyl 34:1	Fasting glucose	rs11558471	8	118185733	SLC30A8	A	G	0.6696	1.11058	0.0334041	6.75	NP	NP	SLC30A8	No
Phosphatidylcholine alkyl-acyl 34:1	Fasting glucose	rs10787312	10	113023966	ADRA2A(dist=183304), GPAM(dist=885656)	A	G	0.9068	-1.36826	0.0346173	6.77419	NP	NP	ADRA2A	No
Phosphatidylcholine alkyl-acyl 34:1	Fasting glucose	rs12805422	11	45839889	SLC35C1(dist=5322), CRY2(dist=28780)	A	G	0.5763	0.553299	0.027813	-6.21622	NP	NP	CRY2, MAPK8IP1	No
Phosphatidylcholine alkyl-acyl 34:1	Fasting glucose	rs7102746	11	92666563	FAT3(dist=36928), MTNR1B(dist=36226)	T	C	0.4652	1.06038	0.0328408	-6.74419	NP	NP	MTNR1B	No
Phosphatidylcholine alkyl-acyl 34:1	Fasting glucose	rs10830963	11	92708710	MTNR1B	C	G	0.7294	1.74684	0.229908	-17.5556	NP	NP	MTNR1B	No
Phosphatidylcholine alkyl-acyl 34:1	Fasting glucose	rs17390909	12	97868654	RMST	C	G	0.9029	0.801676	0.0228987	5.52239	NP	NP	(NA)	No
Phosphatidylcholine alkyl-acyl 34:3	Fasting glucose	rs780093	2	27742603	GCKR	T	C	0.3553	-3.26961	0.0400332	-7.2973	NP	NP	GCKR	Yes
Phosphatidylcholine alkyl-acyl 34:3	Fasting glucose	rs853770	2	169749841	SPC25(dist=2897), G6PC2(dist=7909)	T	C	0.3052	-0.0950704	0.0421445	7.38095	NP	NP	G6PC2	Yes
Phosphatidylcholine alkyl-acyl 34:3	Fasting glucose	rs560887	2	169763148	G6PC2	T	C	0.3095	0.460714	0.252022	-18.2927	NP	NP	G6PC2	Yes
Phosphatidylcholine alkyl-acyl 34:3	Fasting glucose	rs6709087	2	169799010	ABCB11	A	G	0.7992	0.466667	0.123354	-12.8	NP	NP	G6PC2	Yes
Phosphatidylcholine alkyl-acyl 34:3	Fasting glucose	rs11717195	3	123082398	ADCY5	T	C	0.7252	0.936364	0.0279066	6.17021	NP	NP	ADCY5	Yes
Phosphatidylcholine alkyl-acyl 34:3	Fasting glucose	rs10276674	7	14922007	DGKB(dist=40932), AGMO(dist=317936)	T	C	0.8215	-1.32443	0.0373884	-7.05882	NP	NP	DGKB (phospholipid mediated)	No
Phosphatidylcholine alkyl-acyl 34:3	Fasting glucose	rs2191349	7	15064309	DGKB(dist=183234), AGMO(dist=175634)	T	G	0.5373	0.889447	0.0521899	8.33333	NP	NP	DGKB?	No
Phosphatidylcholine alkyl-acyl 34:3	Fasting glucose	rs6975024	7	44231886	GCK(dist=2864), YKT6(dist=8692)	T	C	0.8174	-0.468992	0.121213	-12.6531	NP	NP	GCK	Yes
Phosphatidylcholine alkyl-acyl 34:3	Fasting glucose	rs11558471	8	118185733	SLC30A8	A	G	0.6696	-0.453271	0.0334041	6.75	NP	NP	SLC30A8	No
Phosphatidylcholine alkyl-acyl 34:3	Fasting glucose	rs10787312	10	113023966	ADRA2A(dist=183304), GPAM(dist=885656)	A	G	0.9065	-0.151163	0.0346173	6.77419	NP	NP	ADRA2A	No
Phosphatidylcholine alkyl-acyl 34:3	Fasting glucose	rs12805422	11	45839889	SLC35C1(dist=5322), CRY2(dist=28780)	A	G	0.5763	0.724138	0.027813	-6.21622	NP	NP	CRY2, MAPK8IP1	No
Phosphatidylcholine alkyl-acyl 34:3	Fasting glucose	rs7102746	11	92666563	FAT3(dist=36928), MTNR1B(dist=36226)	T	C	0.4651	0.239286	0.0328408	-6.74419	NP	NP	MTNR1B	No
Phosphatidylcholine alkyl-acyl 34:3	Fasting glucose	rs10830963	11	92708710	MTNR1B	C	G	0.7315	1.68651	0.229908	-17.5556	NP	NP	MTNR1B	No
Phosphatidylcholine alkyl-acyl 34:3	Fasting glucose	rs17390909	12	97868654	RMST	C	G	0.9022	1.91922	0.0228987	5.52239	NP	NP	(NA)	No
Phosphatidylcholine alkyl-acyl 36:2 (Biocrates)	Fasting glucose	rs780093	2	27742603	GCKR	T	C	0.3749	-0.276596	0.0400332	-7.2973	NP	NP	GCKR	Yes
Phosphatidylcholine alkyl-acyl 36:2 (Biocrates)	Fasting glucose	rs560887	2	169763148	G6PC2	T	C	0.3224	1.5102	0.252022	-18.2927	NP	NP	G6PC2	Yes
Phosphatidylcholine alkyl-acyl 36:2 (Biocrates)	Fasting glucose	rs6709087	2	169799010	ABCB11	A	G	0.7935	1.15517	0.123354	-12.8	NP	NP	G6PC2	Yes
Phosphatidylcholine alkyl-acyl 36:2 (Biocrates)	Fasting glucose	rs11717195	3	123082398	ADCY5	T	C	0.7624	1.17544	0.0279066	6.17021	NP	NP	ADCY5	Yes
Phosphatidylcholine alkyl-acyl 36:2 (Biocrates)	Fasting glucose	rs10276674	7	14922007	DGKB(dist=40932), AGMO(dist=317936)	T	C	0.8269	-0.435484	0.0373884	-7.05882	NP	NP	DGKB (phospholipid mediated)	No
Phosphatidylcholine alkyl-acyl 36:2 (Biocrates)	Fasting glucose	rs2191349	7	15064309	DGKB(dist=183234), AGMO(dist=175634)	T	G	0.5371	1.43478	0.0521899	8.33333	NP	NP	DGKB?	No
Phosphatidylcholine alkyl-acyl 36:2 (Biocrates)	Fasting glucose	rs6975024	7	44231886	GCK(dist=2864), YKT6(dist=8692)	T	C	0.8334	0.416667	0.121213	-12.6531	NP	NP	GCK	Yes
Phosphatidylcholine alkyl-acyl 36:2 (Biocrates)	Fasting glucose	rs11558471	8	118185733	SLC30A8	A	G	0.6783	0.36	0.0334041	6.75	NP	NP	SLC30A8	No
Phosphatidylcholine alkyl-acyl 36:2 (Biocrates)	Fasting glucose	rs10787312	10	113023966	ADRA2A(dist=183304), GPAM(dist=885656)	A	G	0.8933	0.74359	0.0346173	6.77419	NP	NP	ADRA2A	No
Phosphatidylcholine alkyl-acyl 36:2 (Biocrates)	Fasting glucose	rs12805422	11	45839889	SLC35C1(dist=5322), CRY2(dist=28780)	A	G	0.5609	-2.27083	0.027813	-6.21622	NP	NP	CRY2, MAPK8IP1	No
Phosphatidylcholine alkyl-acyl 36:2 (Biocrates)	Fasting glucose	rs7102746	11	92666563	FAT3(dist=36928), MTNR1B(dist=36226)	T	C	0.4816	-1.26667	0.0328408	-6.74419	NP	NP	MTNR1B	No
Phosphatidylcholine alkyl-acyl 36:2 (Biocrates)	Fasting glucose	rs10830963	11	92708710	MTNR1B	C	G	0.7255	-2.31034	0.229908	-17.5556	NP	NP	MTNR1B	No
Phosphatidylcholine alkyl-acyl 36:2 (Biocrates)	Fasting glucose	rs17390909	12	97868654	RMST	C	G	0.8954	-0.294872	0.0228987	5.52239	NP	NP	(NA)	No
Phosphatidylcholine alkyl-acyl 36:2 (LC-MS)	Fasting glucose	rs853770	2	169749841	SPC25(dist=2897), G6PC2(dist=7909)	T	C	0.3054	-1.03534	0.0421445	7.38095	NP	NP	G6PC2	Yes
Phosphatidylcholine alkyl-acyl 36:2 (LC-MS)	Fasting glucose	rs560887	2	169763148	G6PC2	T	C	0.3096	1.49823	0.252022	-18.2927	NP	NP	G6PC2	Yes
Phosphatidylcholine alkyl-acyl 36:2 (LC-MS)	Fasting glucose	rs6709087	2	169799010	ABCB11	A	G	0.7998	1.8522	0.123354	-12.8	NP	NP	G6PC2	Yes
Phosphatidylcholine alkyl-acyl 36:2 (LC-MS)	Fasting glucose	rs11717195	3	123082398	ADCY5	T	C	0.7252	1.39908	0.0279066	6.17021	NP	NP	ADCY5	Yes
Phosphatidylcholine alkyl-acyl 36:2 (LC-MS)	Fasting glucose	rs10276674	7	14922007	DGKB(dist=40932), AGMO(dist=317936)	T	C	0.8214	-0.185606	0.0373884	-7.05882	NP	NP	DGKB (phospholipid mediated)	No
Phosphatidylcholine alkyl-acyl 36:2 (LC-MS)	Fasting glucose	rs2191349	7	15064309	DGKB(dist=183234), AGMO(dist=175634)	T	G	0.5373	1.53266	0.0521899	8.33333	NP	NP	DGKB?	No
Phosphatidylcholine alkyl-acyl 36:2 (LC-MS)	Fasting glucose	rs6975024	7	44231886	GCK(dist=2864), YKT6(dist=8692)	T	C	0.8176	-0.249027	0.121213	-12.6531	NP	NP	GCK	Yes
Phosphatidylcholine alkyl-acyl 36:2 (LC-MS)	Fasting glucose	rs11558471	8	118185733	SLC30A8	A	G	0.6696	-0.0751174	0.0334041	6.75	NP	NP	SLC30A8	No
Phosphatidylcholine alkyl-acyl 36:2 (LC-MS)	Fasting glucose	rs10787312	10	113023966	ADRA2A(dist=183304), GPAM(dist=885656)	A	G	0.9064	-0.245014	0.0346173	6.77419	NP	NP	ADRA2A	No
Phosphatidylcholine alkyl-acyl 36:2 (LC-MS)	Fasting glucose	rs12805422	11	45839889	SLC35C1(dist=5322), CRY2(dist=28780)	A	G	0.5764	1.11386	0.027813	-6.21622	NP	NP	CRY2, MAPK8IP1	No
Phosphatidylcholine alkyl-acyl 36:2 (LC-MS)	Fasting glucose	rs7102746	11	92666563	FAT3(dist=36928), MTNR1B(dist=36226)	T	C	0.4652	0.772563	0.0328408	-6.74419	NP	NP	MTNR1B	No
Phosphatidylcholine alkyl-acyl 36:2 (LC-MS)	Fasting glucose	rs10830963	11	92708710	MTNR1B	C	G	0.7301	1.28163	0.229908	-17.5556	NP	NP	MTNR1B	No
Phosphatidylcholine alkyl-acyl 36:2 (LC-MS)	Fasting glucose	rs17390909	12	97868654	RMST	C	G	0.9025	0.967391	0.0228987	5.52239	NP	NP	(NA)	No
Phosphatidylcholine alkyl-acyl 36:3	Fasting glucose	rs853770	2	169749841	SPC25(dist=2897), G6PC2(dist=7909)	T	C	0.3057	0.192171	0.0421445	7.38095	NP	NP	G6PC2	Yes
Phosphatidylcholine alkyl-acyl 36:3	Fasting glucose	rs560887	2	169763148	G6PC2	T	C	0.3093	0.911032	0.252022	-18.2927	NP	NP	G6PC2	Yes
Phosphatidylcholine alkyl-acyl 36:3	Fasting glucose	rs6709087	2	169799010	ABCB11	A	G	0.7996	-0.893082	0.123354	-12.8	NP	NP	G6PC2	Yes
Phosphatidylcholine alkyl-acyl 36:3	Fasting glucose	rs11717195	3	123082398	ADCY5	T	C	0.726	0.9	0.0279066	6.17021	NP	NP	ADCY5	Yes
Phosphatidylcholine alkyl-acyl 36:3	Fasting glucose	rs10276674	7	14922007	DGKB(dist=40932), AGMO(dist=317936)	T	C	0.8214	-1.53962	0.0373884	-7.05882	NP	NP	DGKB (phospholipid mediated)	No
Phosphatidylcholine alkyl-acyl 36:3	Fasting glucose	rs2191349	7	15064309	DGKB(dist=183234), AGMO(dist=175634)	T	G	0.5372	1.815	0.0521899	8.33333	NP	NP	DGKB?	No
Phosphatidylcholine alkyl-acyl 36:3	Fasting glucose	rs6975024	7	44231886	GCK(dist=2864), YKT6(dist=8692)	T	C	0.8177	-0.105058	0.121213	-12.6531	NP	NP	GCK	Yes
Phosphatidylcholine alkyl-acyl 36:3	Fasting glucose	rs11558471	8	118185733	SLC30A8	A	G	0.6691	-0.551402	0.0334041	6.75	NP	NP	SLC30A8	No
Phosphatidylcholine alkyl-acyl 36:3	Fasting glucose	rs10787312	10	113023966	ADRA2A(dist=183304), GPAM(dist=885656)	A	G	0.9066	0.692754	0.0346173	6.77419	NP	NP	ADRA2A	No
Phosphatidylcholine alkyl-acyl 36:3	Fasting glucose	rs12805422	11	45839889	SLC35C1(dist=5322), CRY2(dist=28780)	A	G	0.5763	0.921569	0.027813	-6.21622	NP	NP	CRY2, MAPK8IP1	No
Phosphatidylcholine alkyl-acyl 36:3	Fasting glucose	rs7102746	11	92666563	FAT3(dist=36928), MTNR1B(dist=36226)	T	C	0.4652	0.67148	0.0328408	-6.74419	NP	NP	MTNR1B	No
Phosphatidylcholine alkyl-acyl 36:3	Fasting glucose	rs10830963	11	92708710	MTNR1B	C	G	0.731	1.0119	0.229908	-17.5556	NP	NP	MTNR1B	No
Phosphatidylcholine alkyl-acyl 36:3	Fasting glucose	rs17390909	12	97868654	RMST	C	G	0.9025	1.58808	0.0228987	5.52239	NP	NP	(NA)	No
Phosphatidylcholine alkyl-acyl 40:3	Fasting glucose	rs780093	2	27742603	GCKR	T	C	0.3805	-0.533333	0.0400332	-7.2973	NP	NP	GCKR	Yes
Phosphatidylcholine alkyl-acyl 40:3	Fasting glucose	rs560887	2	169763148	G6PC2	T	C	0.324	2.22917	0.252022	-18.2927	NP	NP	G6PC2	Yes
Phosphatidylcholine alkyl-acyl 40:3	Fasting glucose	rs6709087	2	169799010	ABCB11	A	G	0.7922	1.25	0.123354	-12.8	NP	NP	G6PC2	Yes
Phosphatidylcholine alkyl-acyl 40:3	Fasting glucose	rs11717195	3	123082398	ADCY5	T	C	0.7677	0.454545	0.0279066	6.17021	NP	NP	ADCY5	Yes
Phosphatidylcholine alkyl-acyl 40:3	Fasting glucose	rs10276674	7	14922007	DGKB(dist=40932), AGMO(dist=317936)	T	C	0.8271	0.101695	0.0373884	-7.05882	NP	NP	DGKB (phospholipid mediated)	No
Phosphatidylcholine alkyl-acyl 40:3	Fasting glucose	rs2191349	7	15064309	DGKB(dist=183234), AGMO(dist=175634)	T	G	0.538	1.11364	0.0521899	8.33333	NP	NP	DGKB?	No
Phosphatidylcholine alkyl-acyl 40:3	Fasting glucose	rs6975024	7	44231886	GCK(dist=2864), YKT6(dist=8692)	T	C	0.8341	0.896552	0.121213	-12.6531	NP	NP	GCK	Yes
Phosphatidylcholine alkyl-acyl 40:3	Fasting glucose	rs11558471	8	118185733	SLC30A8	A	G	0.6785	0.729167	0.0334041	6.75	NP	NP	SLC30A8	No
Phosphatidylcholine alkyl-acyl 40:3	Fasting glucose	rs10787312	10	113023966	ADRA2A(dist=183304), GPAM(dist=885656)	A	G	0.8925	0.824324	0.0346173	6.77419	NP	NP	ADRA2A	No
Phosphatidylcholine alkyl-acyl 40:3	Fasting glucose	rs12805422	11	45839889	SLC35C1(dist=5322), CRY2(dist=28780)	A	G	0.5614	-0.608696	0.027813	-6.21622	NP	NP	CRY2, MAPK8IP1	No
Phosphatidylcholine alkyl-acyl 40:3	Fasting glucose	rs2524299	11	61604782	FADS2	A	T	0.8779	1.88406	0.0261766	5.76923	NP	NP	FADS2 (lipid mediated)	No
Phosphatidylcholine alkyl-acyl 40:3	Fasting glucose	rs7102746	11	92666563	FAT3(dist=36928), MTNR1B(dist=36226)	T	C	0.481	-0.301887	0.0328408	-6.74419	NP	NP	MTNR1B	No
Phosphatidylcholine alkyl-acyl 40:3	Fasting glucose	rs10830963	11	92708710	MTNR1B	C	G	0.7236	-1.72222	0.229908	-17.5556	NP	NP	MTNR1B	No
Phosphatidylcholine alkyl-acyl 40:3	Fasting glucose	rs17390909	12	97868654	RMST	C	G	0.8946	0.186667	0.0228987	5.52239	NP	NP	(NA)	No
Phosphatidylcholine alkyl-acyl 42:3	Fasting glucose	rs780093	2	27742603	GCKR	T	C	0.3779	0.787234	0.0400332	-7.2973	NP	NP	GCKR	Yes
Phosphatidylcholine alkyl-acyl 42:3	Fasting glucose	rs560887	2	169763148	G6PC2	T	C	0.323	1.96	0.252022	-18.2927	NP	NP	G6PC2	Yes
Phosphatidylcholine alkyl-acyl 42:3	Fasting glucose	rs6709087	2	169799010	ABCB11	A	G	0.7925	0.913793	0.123354	-12.8	NP	NP	G6PC2	Yes
Phosphatidylcholine alkyl-acyl 42:3	Fasting glucose	rs11717195	3	123082398	ADCY5	T	C	0.7657	1.49123	0.0279066	6.17021	NP	NP	ADCY5	Yes
Phosphatidylcholine alkyl-acyl 42:3	Fasting glucose	rs10276674	7	14922007	DGKB(dist=40932), AGMO(dist=317936)	T	C	0.8271	0.145161	0.0373884	-7.05882	NP	NP	DGKB (phospholipid mediated)	No
Phosphatidylcholine alkyl-acyl 42:3	Fasting glucose	rs2191349	7	15064309	DGKB(dist=183234), AGMO(dist=175634)	T	G	0.5376	0.782609	0.0521899	8.33333	NP	NP	DGKB?	No
Phosphatidylcholine alkyl-acyl 42:3	Fasting glucose	rs6975024	7	44231886	GCK(dist=2864), YKT6(dist=8692)	T	C	0.8338	-0.3	0.121213	-12.6531	NP	NP	GCK	Yes
Phosphatidylcholine alkyl-acyl 42:3	Fasting glucose	rs11558471	8	118185733	SLC30A8	A	G	0.6784	-0.08	0.0334041	6.75	NP	NP	SLC30A8	No
Phosphatidylcholine alkyl-acyl 42:3	Fasting glucose	rs10787312	10	113023966	ADRA2A(dist=183304), GPAM(dist=885656)	A	G	0.8931	1.66667	0.0346173	6.77419	NP	NP	ADRA2A	No
Phosphatidylcholine alkyl-acyl 42:3	Fasting glucose	rs12805422	11	45839889	SLC35C1(dist=5322), CRY2(dist=28780)	A	G	0.5611	-1.22917	0.027813	-6.21622	NP	NP	CRY2, MAPK8IP1	No
Phosphatidylcholine alkyl-acyl 42:3	Fasting glucose	rs2524299	11	61604782	FADS2	A	T	0.8754	0.690141	0.0261766	5.76923	NP	NP	FADS2 (lipid mediated)	No
Phosphatidylcholine alkyl-acyl 42:3	Fasting glucose	rs7102746	11	92666563	FAT3(dist=36928), MTNR1B(dist=36226)	T	C	0.4792	-0.779661	0.0328408	-6.74419	NP	NP	MTNR1B	No
Phosphatidylcholine alkyl-acyl 42:3	Fasting glucose	rs10830963	11	92708710	MTNR1B	C	G	0.7246	-1.85965	0.229908	-17.5556	NP	NP	MTNR1B	No
Phosphatidylcholine alkyl-acyl 42:3	Fasting glucose	rs17390909	12	97868654	RMST	C	G	0.895	-0.0769231	0.0228987	5.52239	NP	NP	(NA)	No
Phosphatidylcholine alkyl-acyl 42:4	Fasting glucose	rs780093	2	27742603	GCKR	T	C	0.3745	0.0444444	0.0400332	-7.2973	NP	NP	GCKR	Yes
Phosphatidylcholine alkyl-acyl 42:4	Fasting glucose	rs560887	2	169763148	G6PC2	T	C	0.3238	1.54167	0.252022	-18.2927	NP	NP	G6PC2	Yes
Phosphatidylcholine alkyl-acyl 42:4	Fasting glucose	rs6709087	2	169799010	ABCB11	A	G	0.7926	1.46429	0.123354	-12.8	NP	NP	G6PC2	Yes
Phosphatidylcholine alkyl-acyl 42:4	Fasting glucose	rs11717195	3	123082398	ADCY5	T	C	0.7614	0.381818	0.0279066	6.17021	NP	NP	ADCY5	Yes
Phosphatidylcholine alkyl-acyl 42:4	Fasting glucose	rs10276674	7	14922007	DGKB(dist=40932), AGMO(dist=317936)	T	C	0.8267	0.166667	0.0373884	-7.05882	NP	NP	DGKB (phospholipid mediated)	No
Phosphatidylcholine alkyl-acyl 42:4	Fasting glucose	rs2191349	7	15064309	DGKB(dist=183234), AGMO(dist=175634)	T	G	0.538	2.28889	0.0521899	8.33333	NP	NP	DGKB?	No
Phosphatidylcholine alkyl-acyl 42:4	Fasting glucose	rs6975024	7	44231886	GCK(dist=2864), YKT6(dist=8692)	T	C	0.8336	0.224138	0.121213	-12.6531	NP	NP	GCK	Yes
Phosphatidylcholine alkyl-acyl 42:4	Fasting glucose	rs11558471	8	118185733	SLC30A8	A	G	0.6798	0.770833	0.0334041	6.75	NP	NP	SLC30A8	No
Phosphatidylcholine alkyl-acyl 42:4	Fasting glucose	rs10787312	10	113023966	ADRA2A(dist=183304), GPAM(dist=885656)	A	G	0.8926	0.786667	0.0346173	6.77419	NP	NP	ADRA2A	No
Phosphatidylcholine alkyl-acyl 42:4	Fasting glucose	rs12805422	11	45839889	SLC35C1(dist=5322), CRY2(dist=28780)	A	G	0.5586	-0.847826	0.027813	-6.21622	NP	NP	CRY2, MAPK8IP1	No
Phosphatidylcholine alkyl-acyl 42:4	Fasting glucose	rs7102746	11	92666563	FAT3(dist=36928), MTNR1B(dist=36226)	T	C	0.4759	-1.03448	0.0328408	-6.74419	NP	NP	MTNR1B	No
Phosphatidylcholine alkyl-acyl 42:4	Fasting glucose	rs10830963	11	92708710	MTNR1B	C	G	0.7236	-2.49091	0.229908	-17.5556	NP	NP	MTNR1B	No
Phosphatidylcholine alkyl-acyl 42:4	Fasting glucose	rs17390909	12	97868654	RMST	C	G	0.8938	0.513514	0.0228987	5.52239	NP	NP	(NA)	No
Phosphatidylcholine alkyl-acyl 42:5	Fasting glucose	rs780093	2	27742603	GCKR	T	C	0.3753	0	0.0400332	-7.2973	NP	NP	GCKR	Yes
Phosphatidylcholine alkyl-acyl 42:5	Fasting glucose	rs853770	2	169749841	SPC25(dist=2897), G6PC2(dist=7909)	T	C	0.306	-2.15217	0.0421445	7.38095	NP	NP	G6PC2	Yes
Phosphatidylcholine alkyl-acyl 42:5	Fasting glucose	rs6709087	2	169799010	ABCB11	A	G	0.791	0.519231	0.123354	-12.8	NP	NP	G6PC2	Yes
Phosphatidylcholine alkyl-acyl 42:5	Fasting glucose	rs11717195	3	123082398	ADCY5	T	C	0.7573	0.372549	0.0279066	6.17021	NP	NP	ADCY5	Yes
Phosphatidylcholine alkyl-acyl 42:5	Fasting glucose	rs10276674	7	14922007	DGKB(dist=40932), AGMO(dist=317936)	T	C	0.8282	0	0.0373884	-7.05882	NP	NP	DGKB (phospholipid mediated)	No
Phosphatidylcholine alkyl-acyl 42:5	Fasting glucose	rs2191349	7	15064309	DGKB(dist=183234), AGMO(dist=175634)	T	G	0.5392	1.61905	0.0521899	8.33333	NP	NP	DGKB?	No
Phosphatidylcholine alkyl-acyl 42:5	Fasting glucose	rs6975024	7	44231886	GCK(dist=2864), YKT6(dist=8692)	T	C	0.8293	0.12963	0.121213	-12.6531	NP	NP	GCK	Yes
Phosphatidylcholine alkyl-acyl 42:5	Fasting glucose	rs11558471	8	118185733	SLC30A8	A	G	0.6855	0.266667	0.0334041	6.75	NP	NP	SLC30A8	No
Phosphatidylcholine alkyl-acyl 42:5	Fasting glucose	rs10787312	10	113023966	ADRA2A(dist=183304), GPAM(dist=885656)	A	G	0.8906	1.81429	0.0346173	6.77419	NP	NP	ADRA2A	No
Phosphatidylcholine alkyl-acyl 42:5	Fasting glucose	rs12805422	11	45839889	SLC35C1(dist=5322), CRY2(dist=28780)	A	G	0.5621	-1.51163	0.027813	-6.21622	NP	NP	CRY2, MAPK8IP1	No
Phosphatidylcholine alkyl-acyl 42:5	Fasting glucose	rs7102746	11	92666563	FAT3(dist=36928), MTNR1B(dist=36226)	T	C	0.4776	-1	0.0328408	-6.74419	NP	NP	MTNR1B	No
Phosphatidylcholine alkyl-acyl 42:5	Fasting glucose	rs10830963	11	92708710	MTNR1B	C	G	0.7309	-1.94231	0.229908	-17.5556	NP	NP	MTNR1B	No
Phosphatidylcholine alkyl-acyl 42:5	Fasting glucose	rs17390909	12	97868654	RMST	C	G	0.8955	0.591549	0.0228987	5.52239	NP	NP	(NA)	No
Phosphatidylcholine alkyl-acyl 44:3	Fasting glucose	rs780093	2	27742603	GCKR	T	C	0.381	0.519231	0.0400332	-7.2973	NP	NP	GCKR	Yes
Phosphatidylcholine alkyl-acyl 44:3	Fasting glucose	rs853770	2	169749841	SPC25(dist=2897), G6PC2(dist=7909)	T	C	0.3083	-2.10714	0.0421445	7.38095	NP	NP	G6PC2	Yes
Phosphatidylcholine alkyl-acyl 44:3	Fasting glucose	rs560887	2	169763148	G6PC2	T	C	0.3234	2.23636	0.252022	-18.2927	NP	NP	G6PC2	Yes
Phosphatidylcholine alkyl-acyl 44:3	Fasting glucose	rs6709087	2	169799010	ABCB11	A	G	0.7912	0.123077	0.123354	-12.8	NP	NP	G6PC2	Yes
Phosphatidylcholine alkyl-acyl 44:3	Fasting glucose	rs11717195	3	123082398	ADCY5	T	C	0.7688	0.984375	0.0279066	6.17021	NP	NP	ADCY5	Yes
Phosphatidylcholine alkyl-acyl 44:3	Fasting glucose	rs10276674	7	14922007	DGKB(dist=40932), AGMO(dist=317936)	T	C	0.8269	0.347826	0.0373884	-7.05882	NP	NP	DGKB (phospholipid mediated)	No
Phosphatidylcholine alkyl-acyl 44:3	Fasting glucose	rs2191349	7	15064309	DGKB(dist=183234), AGMO(dist=175634)	T	G	0.5386	1.01961	0.0521899	8.33333	NP	NP	DGKB?	No
Phosphatidylcholine alkyl-acyl 44:3	Fasting glucose	rs6975024	7	44231886	GCK(dist=2864), YKT6(dist=8692)	T	C	0.8345	0.19403	0.121213	-12.6531	NP	NP	GCK	Yes
Phosphatidylcholine alkyl-acyl 44:3	Fasting glucose	rs11558471	8	118185733	SLC30A8	A	G	0.6786	0	0.0334041	6.75	NP	NP	SLC30A8	No
Phosphatidylcholine alkyl-acyl 44:3	Fasting glucose	rs10787312	10	113023966	ADRA2A(dist=183304), GPAM(dist=885656)	A	G	0.8925	1.81395	0.0346173	6.77419	NP	NP	ADRA2A	No
Phosphatidylcholine alkyl-acyl 44:3	Fasting glucose	rs12805422	11	45839889	SLC35C1(dist=5322), CRY2(dist=28780)	A	G	0.5604	-1.18868	0.027813	-6.21622	NP	NP	CRY2, MAPK8IP1	No
Phosphatidylcholine alkyl-acyl 44:3	Fasting glucose	rs2524299	11	61604782	FADS2	A	T	0.8755	2.01282	0.0261766	5.76923	NP	NP	FADS2 (lipid mediated)	No
Phosphatidylcholine alkyl-acyl 44:3	Fasting glucose	rs7102746	11	92666563	FAT3(dist=36928), MTNR1B(dist=36226)	T	C	0.4776	-0.53125	0.0328408	-6.74419	NP	NP	MTNR1B	No
Phosphatidylcholine alkyl-acyl 44:3	Fasting glucose	rs10830963	11	92708710	MTNR1B	C	G	0.7225	-1.09524	0.229908	-17.5556	NP	NP	MTNR1B	No
Phosphatidylcholine alkyl-acyl 44:3	Fasting glucose	rs17390909	12	97868654	RMST	C	G	0.8941	0.255814	0.0228987	5.52239	NP	NP	(NA)	No
Phosphatidylcholine alkyl-acyl 44:4	Fasting glucose	rs780093	2	27742603	GCKR	T	C	0.3737	0.377778	0.0400332	-7.2973	NP	NP	GCKR	Yes
Phosphatidylcholine alkyl-acyl 44:4	Fasting glucose	rs853770	2	169749841	SPC25(dist=2897), G6PC2(dist=7909)	T	C	0.304	-2.40816	0.0421445	7.38095	NP	NP	G6PC2	Yes
Phosphatidylcholine alkyl-acyl 44:4	Fasting glucose	rs560887	2	169763148	G6PC2	T	C	0.3226	0.375	0.252022	-18.2927	NP	NP	G6PC2	Yes
Phosphatidylcholine alkyl-acyl 44:4	Fasting glucose	rs6709087	2	169799010	ABCB11	A	G	0.7929	0.517857	0.123354	-12.8	NP	NP	G6PC2	Yes
Phosphatidylcholine alkyl-acyl 44:4	Fasting glucose	rs11717195	3	123082398	ADCY5	T	C	0.7607	1.24074	0.0279066	6.17021	NP	NP	ADCY5	Yes
Phosphatidylcholine alkyl-acyl 44:4	Fasting glucose	rs10276674	7	14922007	DGKB(dist=40932), AGMO(dist=317936)	T	C	0.8267	0.183333	0.0373884	-7.05882	NP	NP	DGKB (phospholipid mediated)	No
Phosphatidylcholine alkyl-acyl 44:4	Fasting glucose	rs2191349	7	15064309	DGKB(dist=183234), AGMO(dist=175634)	T	G	0.5378	1.46667	0.0521899	8.33333	NP	NP	DGKB?	No
Phosphatidylcholine alkyl-acyl 44:4	Fasting glucose	rs6975024	7	44231886	GCK(dist=2864), YKT6(dist=8692)	T	C	0.8335	0.482759	0.121213	-12.6531	NP	NP	GCK	Yes
Phosphatidylcholine alkyl-acyl 44:4	Fasting glucose	rs11558471	8	118185733	SLC30A8	A	G	0.6794	0.3125	0.0334041	6.75	NP	NP	SLC30A8	No
Phosphatidylcholine alkyl-acyl 44:4	Fasting glucose	rs10787312	10	113023966	ADRA2A(dist=183304), GPAM(dist=885656)	A	G	0.8927	-0.04	0.0346173	6.77419	NP	NP	ADRA2A	No
Phosphatidylcholine alkyl-acyl 44:4	Fasting glucose	rs12805422	11	45839889	SLC35C1(dist=5322), CRY2(dist=28780)	A	G	0.5589	-1.65217	0.027813	-6.21622	NP	NP	CRY2, MAPK8IP1	No
Phosphatidylcholine alkyl-acyl 44:4	Fasting glucose	rs2524299	11	61604782	FADS2	A	T	0.8738	0.647059	0.0261766	5.76923	NP	NP	FADS2 (lipid mediated)	No
Phosphatidylcholine alkyl-acyl 44:4	Fasting glucose	rs7102746	11	92666563	FAT3(dist=36928), MTNR1B(dist=36226)	T	C	0.4773	-0.389831	0.0328408	-6.74419	NP	NP	MTNR1B	No
Phosphatidylcholine alkyl-acyl 44:4	Fasting glucose	rs10830963	11	92708710	MTNR1B	C	G	0.7231	-2.09091	0.229908	-17.5556	NP	NP	MTNR1B	No
Phosphatidylcholine alkyl-acyl 44:4	Fasting glucose	rs17390909	12	97868654	RMST	C	G	0.894	-0.333333	0.0228987	5.52239	NP	NP	(NA)	No
Phosphatidylcholine alkyl-acyl 44:5	Fasting glucose	rs780093	2	27742603	GCKR	T	C	0.3758	-0.9	0.0400332	-7.2973	NP	NP	GCKR	Yes
Phosphatidylcholine alkyl-acyl 44:5	Fasting glucose	rs853770	2	169749841	SPC25(dist=2897), G6PC2(dist=7909)	T	C	0.3047	-2.14545	0.0421445	7.38095	NP	NP	G6PC2	Yes
Phosphatidylcholine alkyl-acyl 44:5	Fasting glucose	rs560887	2	169763148	G6PC2	T	C	0.3228	1.75472	0.252022	-18.2927	NP	NP	G6PC2	Yes
Phosphatidylcholine alkyl-acyl 44:5	Fasting glucose	rs11717195	3	123082398	ADCY5	T	C	0.7629	0.327869	0.0279066	6.17021	NP	NP	ADCY5	Yes
Phosphatidylcholine alkyl-acyl 44:5	Fasting glucose	rs10276674	7	14922007	DGKB(dist=40932), AGMO(dist=317936)	T	C	0.8273	0.552239	0.0373884	-7.05882	NP	NP	DGKB (phospholipid mediated)	No
Phosphatidylcholine alkyl-acyl 44:5	Fasting glucose	rs2191349	7	15064309	DGKB(dist=183234), AGMO(dist=175634)	T	G	0.5376	1.56	0.0521899	8.33333	NP	NP	DGKB?	No
Phosphatidylcholine alkyl-acyl 44:5	Fasting glucose	rs6975024	7	44231886	GCK(dist=2864), YKT6(dist=8692)	T	C	0.8327	0.830769	0.121213	-12.6531	NP	NP	GCK	Yes
Phosphatidylcholine alkyl-acyl 44:5	Fasting glucose	rs11558471	8	118185733	SLC30A8	A	G	0.6798	-0.0754717	0.0334041	6.75	NP	NP	SLC30A8	No
Phosphatidylcholine alkyl-acyl 44:5	Fasting glucose	rs10787312	10	113023966	ADRA2A(dist=183304), GPAM(dist=885656)	A	G	0.8928	0.915663	0.0346173	6.77419	NP	NP	ADRA2A	No
Phosphatidylcholine alkyl-acyl 44:5	Fasting glucose	rs12805422	11	45839889	SLC35C1(dist=5322), CRY2(dist=28780)	A	G	0.5613	-1.21569	0.027813	-6.21622	NP	NP	CRY2, MAPK8IP1	No
Phosphatidylcholine alkyl-acyl 44:5	Fasting glucose	rs7102746	11	92666563	FAT3(dist=36928), MTNR1B(dist=36226)	T	C	0.4783	-0.723077	0.0328408	-6.74419	NP	NP	MTNR1B	No
Phosphatidylcholine alkyl-acyl 44:5	Fasting glucose	rs10830963	11	92708710	MTNR1B	C	G	0.7262	-1.59677	0.229908	-17.5556	NP	NP	MTNR1B	No
Phosphatidylcholine alkyl-acyl 44:5	Fasting glucose	rs17390909	12	97868654	RMST	C	G	0.8952	0.22619	0.0228987	5.52239	NP	NP	(NA)	No
Phosphatidylcholine alkyl-acyl 44:6	Fasting glucose	rs780093	2	27742603	GCKR	T	C	0.3742	-0.88	0.0400332	-7.2973	NP	NP	GCKR	Yes
Phosphatidylcholine alkyl-acyl 44:6	Fasting glucose	rs853770	2	169749841	SPC25(dist=2897), G6PC2(dist=7909)	T	C	0.3038	-1.74074	0.0421445	7.38095	NP	NP	G6PC2	Yes
Phosphatidylcholine alkyl-acyl 44:6	Fasting glucose	rs560887	2	169763148	G6PC2	T	C	0.3227	1.50943	0.252022	-18.2927	NP	NP	G6PC2	Yes
Phosphatidylcholine alkyl-acyl 44:6	Fasting glucose	rs6709087	2	169799010	ABCB11	A	G	0.7927	1.09677	0.123354	-12.8	NP	NP	G6PC2	Yes
Phosphatidylcholine alkyl-acyl 44:6	Fasting glucose	rs11717195	3	123082398	ADCY5	T	C	0.7608	0.966667	0.0279066	6.17021	NP	NP	ADCY5	Yes
Phosphatidylcholine alkyl-acyl 44:6	Fasting glucose	rs10276674	7	14922007	DGKB(dist=40932), AGMO(dist=317936)	T	C	0.8273	-0.30303	0.0373884	-7.05882	NP	NP	DGKB (phospholipid mediated)	No
Phosphatidylcholine alkyl-acyl 44:6	Fasting glucose	rs2191349	7	15064309	DGKB(dist=183234), AGMO(dist=175634)	T	G	0.5376	0.571429	0.0521899	8.33333	NP	NP	DGKB?	No
Phosphatidylcholine alkyl-acyl 44:6	Fasting glucose	rs6975024	7	44231886	GCK(dist=2864), YKT6(dist=8692)	T	C	0.8324	-0.203125	0.121213	-12.6531	NP	NP	GCK	Yes
Phosphatidylcholine alkyl-acyl 44:6	Fasting glucose	rs11558471	8	118185733	SLC30A8	A	G	0.6803	-0.0566038	0.0334041	6.75	NP	NP	SLC30A8	No
Phosphatidylcholine alkyl-acyl 44:6	Fasting glucose	rs10787312	10	113023966	ADRA2A(dist=183304), GPAM(dist=885656)	A	G	0.8927	1.12195	0.0346173	6.77419	NP	NP	ADRA2A	No
Phosphatidylcholine alkyl-acyl 44:6	Fasting glucose	rs12805422	11	45839889	SLC35C1(dist=5322), CRY2(dist=28780)	A	G	0.5608	-0.745098	0.027813	-6.21622	NP	NP	CRY2, MAPK8IP1	No
Phosphatidylcholine alkyl-acyl 44:6	Fasting glucose	rs7102746	11	92666563	FAT3(dist=36928), MTNR1B(dist=36226)	T	C	0.4779	-0.0461538	0.0328408	-6.74419	NP	NP	MTNR1B	No
Phosphatidylcholine alkyl-acyl 44:6	Fasting glucose	rs10830963	11	92708710	MTNR1B	C	G	0.7264	-1.62295	0.229908	-17.5556	NP	NP	MTNR1B	No
Phosphatidylcholine alkyl-acyl 44:6	Fasting glucose	rs17390909	12	97868654	RMST	C	G	0.8951	-0.542169	0.0228987	5.52239	NP	NP	(NA)	No
Phosphatidylcholine diacyl 32:1	Fasting glucose	rs853770	2	169749841	SPC25(dist=2897), G6PC2(dist=7909)	T	C	0.3057	0.627868	0.0421445	7.38095	NP	NP	G6PC2	Yes
Phosphatidylcholine diacyl 32:1	Fasting glucose	rs560887	2	169763148	G6PC2	T	C	0.3106	0.736356	0.252022	-18.2927	NP	NP	G6PC2	Yes
Phosphatidylcholine diacyl 32:1	Fasting glucose	rs6709087	2	169799010	ABCB11	A	G	0.799	-0.438342	0.123354	-12.8	NP	NP	G6PC2	Yes
Phosphatidylcholine diacyl 32:1	Fasting glucose	rs11717195	3	123082398	ADCY5	T	C	0.726	0.921407	0.0279066	6.17021	NP	NP	ADCY5	Yes
Phosphatidylcholine diacyl 32:1	Fasting glucose	rs10276674	7	14922007	DGKB(dist=40932), AGMO(dist=317936)	T	C	0.8214	2.31749	0.0373884	-7.05882	NP	NP	DGKB (phospholipid mediated)	No
Phosphatidylcholine diacyl 32:1	Fasting glucose	rs2191349	7	15064309	DGKB(dist=183234), AGMO(dist=175634)	T	G	0.5367	1.74171	0.0521899	8.33333	NP	NP	DGKB?	No
Phosphatidylcholine diacyl 32:1	Fasting glucose	rs6975024	7	44231886	GCK(dist=2864), YKT6(dist=8692)	T	C	0.8169	-0.481361	0.121213	-12.6531	NP	NP	GCK	Yes
Phosphatidylcholine diacyl 32:1	Fasting glucose	rs11558471	8	118185733	SLC30A8	A	G	0.6711	-1.23889	0.0334041	6.75	NP	NP	SLC30A8	No
Phosphatidylcholine diacyl 32:1	Fasting glucose	rs10787312	10	113023966	ADRA2A(dist=183304), GPAM(dist=885656)	A	G	0.9064	-1.30379	0.0346173	6.77419	NP	NP	ADRA2A	No
Phosphatidylcholine diacyl 32:1	Fasting glucose	rs12805422	11	45839889	SLC35C1(dist=5322), CRY2(dist=28780)	A	G	0.5766	-0.37557	0.027813	-6.21622	NP	NP	CRY2, MAPK8IP1	No
Phosphatidylcholine diacyl 32:1	Fasting glucose	rs2524299	11	61604782	FADS2	A	T	0.8773	-0.974426	0.0261766	5.76923	NP	NP	FADS2 (lipid mediated)	No
Phosphatidylcholine diacyl 32:1	Fasting glucose	rs7102746	11	92666563	FAT3(dist=36928), MTNR1B(dist=36226)	T	C	0.4662	-0.055285	0.0328408	-6.74419	NP	NP	MTNR1B	No
Phosphatidylcholine diacyl 32:1	Fasting glucose	rs10830963	11	92708710	MTNR1B	C	G	0.731	-0.453488	0.229908	-17.5556	NP	NP	MTNR1B	No
Phosphatidylcholine diacyl 32:1	Fasting glucose	rs17390909	12	97868654	RMST	C	G	0.9019	-0.866361	0.0228987	5.52239	NP	NP	(NA)	No
Phosphatidylcholine diacyl 34:4 (LC-MS)	Fasting glucose	rs853770	2	169749841	SPC25(dist=2897), G6PC2(dist=7909)	T	C	0.3052	1.7554	0.0421445	7.38095	NP	NP	G6PC2	Yes
Phosphatidylcholine diacyl 34:4 (LC-MS)	Fasting glucose	rs560887	2	169763148	G6PC2	T	C	0.3097	2.10507	0.252022	-18.2927	NP	NP	G6PC2	Yes
Phosphatidylcholine diacyl 34:4 (LC-MS)	Fasting glucose	rs6709087	2	169799010	ABCB11	A	G	0.799	-0.248428	0.123354	-12.8	NP	NP	G6PC2	Yes
Phosphatidylcholine diacyl 34:4 (LC-MS)	Fasting glucose	rs11717195	3	123082398	ADCY5	T	C	0.7255	1.02294	0.0279066	6.17021	NP	NP	ADCY5	Yes
Phosphatidylcholine diacyl 34:4 (LC-MS)	Fasting glucose	rs10276674	7	14922007	DGKB(dist=40932), AGMO(dist=317936)	T	C	0.8216	-0.182879	0.0373884	-7.05882	NP	NP	DGKB (phospholipid mediated)	No
Phosphatidylcholine diacyl 34:4 (LC-MS)	Fasting glucose	rs2191349	7	15064309	DGKB(dist=183234), AGMO(dist=175634)	T	G	0.5372	0.0150754	0.0521899	8.33333	NP	NP	DGKB?	No
Phosphatidylcholine diacyl 34:4 (LC-MS)	Fasting glucose	rs6975024	7	44231886	GCK(dist=2864), YKT6(dist=8692)	T	C	0.8172	-1.86166	0.121213	-12.6531	NP	NP	GCK	Yes
Phosphatidylcholine diacyl 34:4 (LC-MS)	Fasting glucose	rs11558471	8	118185733	SLC30A8	A	G	0.6695	-0.32093	0.0334041	6.75	NP	NP	SLC30A8	No
Phosphatidylcholine diacyl 34:4 (LC-MS)	Fasting glucose	rs10787312	10	113023966	ADRA2A(dist=183304), GPAM(dist=885656)	A	G	0.9065	-1.22965	0.0346173	6.77419	NP	NP	ADRA2A	No
Phosphatidylcholine diacyl 34:4 (LC-MS)	Fasting glucose	rs7102746	11	92666563	FAT3(dist=36928), MTNR1B(dist=36226)	T	C	0.4649	0.934783	0.0328408	-6.74419	NP	NP	MTNR1B	No
Phosphatidylcholine diacyl 34:4 (LC-MS)	Fasting glucose	rs10830963	11	92708710	MTNR1B	C	G	0.7303	0.860656	0.229908	-17.5556	NP	NP	MTNR1B	No
Phosphatidylcholine diacyl 34:4 (LC-MS)	Fasting glucose	rs17390909	12	97868654	RMST	C	G	0.9023	1.50571	0.0228987	5.52239	NP	NP	(NA)	No
Phosphatidylcholine diacyl 34:4 (ESI-MS)	Fasting glucose	rs853770	2	169749841	SPC25(dist=2897), G6PC2(dist=7909)	T	C	0.3056	0.173913	0.0421445	7.38095	NP	NP	G6PC2	Yes
Phosphatidylcholine diacyl 34:4 (ESI-MS)	Fasting glucose	rs560887	2	169763148	G6PC2	T	C	0.3097	-0.303922	0.252022	-18.2927	NP	NP	G6PC2	Yes
Phosphatidylcholine diacyl 34:4 (ESI-MS)	Fasting glucose	rs6709087	2	169799010	ABCB11	A	G	0.7996	-0.353659	0.123354	-12.8	NP	NP	G6PC2	Yes
Phosphatidylcholine diacyl 34:4 (ESI-MS)	Fasting glucose	rs11717195	3	123082398	ADCY5	T	C	0.7249	-0.480349	0.0279066	6.17021	NP	NP	ADCY5	Yes
Phosphatidylcholine diacyl 34:4 (ESI-MS)	Fasting glucose	rs10276674	7	14922007	DGKB(dist=40932), AGMO(dist=317936)	T	C	0.8216	0.441176	0.0373884	-7.05882	NP	NP	DGKB (phospholipid mediated)	No
Phosphatidylcholine diacyl 34:4 (ESI-MS)	Fasting glucose	rs2191349	7	15064309	DGKB(dist=183234), AGMO(dist=175634)	T	G	0.5372	2.85027	0.0521899	8.33333	NP	NP	DGKB?	No
Phosphatidylcholine diacyl 34:4 (ESI-MS)	Fasting glucose	rs6975024	7	44231886	GCK(dist=2864), YKT6(dist=8692)	T	C	0.8177	-2.48101	0.121213	-12.6531	NP	NP	GCK	Yes
Phosphatidylcholine diacyl 34:4 (ESI-MS)	Fasting glucose	rs11558471	8	118185733	SLC30A8	A	G	0.6689	0.502513	0.0334041	6.75	NP	NP	SLC30A8	No
Phosphatidylcholine diacyl 34:4 (ESI-MS)	Fasting glucose	rs10787312	10	113023966	ADRA2A(dist=183304), GPAM(dist=885656)	A	G	0.9066	-1.6657	0.0346173	6.77419	NP	NP	ADRA2A	No
Phosphatidylcholine diacyl 34:4 (ESI-MS)	Fasting glucose	rs12805422	11	45839889	SLC35C1(dist=5322), CRY2(dist=28780)	A	G	0.5763	-0.941489	0.027813	-6.21622	NP	NP	CRY2, MAPK8IP1	No
Phosphatidylcholine diacyl 34:4 (ESI-MS)	Fasting glucose	rs7102746	11	92666563	FAT3(dist=36928), MTNR1B(dist=36226)	T	C	0.4652	-0.280405	0.0328408	-6.74419	NP	NP	MTNR1B	No
Phosphatidylcholine diacyl 34:4 (ESI-MS)	Fasting glucose	rs10830963	11	92708710	MTNR1B	C	G	0.7304	-0.442982	0.229908	-17.5556	NP	NP	MTNR1B	No
Phosphatidylcholine diacyl 34:4 (ESI-MS)	Fasting glucose	rs17390909	12	97868654	RMST	C	G	0.9028	-0.661442	0.0228987	5.52239	NP	NP	(NA)	No
Phosphatidylcholine diacyl 36:1	Fasting glucose	rs780093	2	27742603	GCKR	T	C	0.3547	2.49887	0.0400332	-7.2973	NP	NP	GCKR	Yes
Phosphatidylcholine diacyl 36:1	Fasting glucose	rs853770	2	169749841	SPC25(dist=2897), G6PC2(dist=7909)	T	C	0.3056	-0.57943	0.0421445	7.38095	NP	NP	G6PC2	Yes
Phosphatidylcholine diacyl 36:1	Fasting glucose	rs560887	2	169763148	G6PC2	T	C	0.3097	0.21488	0.252022	-18.2927	NP	NP	G6PC2	Yes
Phosphatidylcholine diacyl 36:1	Fasting glucose	rs6709087	2	169799010	ABCB11	A	G	0.7996	1.61366	0.123354	-12.8	NP	NP	G6PC2	Yes
Phosphatidylcholine diacyl 36:1	Fasting glucose	rs11717195	3	123082398	ADCY5	T	C	0.7249	1.00267	0.0279066	6.17021	NP	NP	ADCY5	Yes
Phosphatidylcholine diacyl 36:1	Fasting glucose	rs10276674	7	14922007	DGKB(dist=40932), AGMO(dist=317936)	T	C	0.8216	0.483216	0.0373884	-7.05882	NP	NP	DGKB (phospholipid mediated)	No
Phosphatidylcholine diacyl 36:1	Fasting glucose	rs2191349	7	15064309	DGKB(dist=183234), AGMO(dist=175634)	T	G	0.5372	2.56021	0.0521899	8.33333	NP	NP	DGKB?	No
Phosphatidylcholine diacyl 36:1	Fasting glucose	rs6975024	7	44231886	GCK(dist=2864), YKT6(dist=8692)	T	C	0.8177	0.0348393	0.121213	-12.6531	NP	NP	GCK	Yes
Phosphatidylcholine diacyl 36:1	Fasting glucose	rs11558471	8	118185733	SLC30A8	A	G	0.6689	0.168612	0.0334041	6.75	NP	NP	SLC30A8	No
Phosphatidylcholine diacyl 36:1	Fasting glucose	rs10787312	10	113023966	ADRA2A(dist=183304), GPAM(dist=885656)	A	G	0.9066	-1.28401	0.0346173	6.77419	NP	NP	ADRA2A	No
Phosphatidylcholine diacyl 36:1	Fasting glucose	rs12805422	11	45839889	SLC35C1(dist=5322), CRY2(dist=28780)	A	G	0.5763	-1.06803	0.027813	-6.21622	NP	NP	CRY2, MAPK8IP1	No
Phosphatidylcholine diacyl 36:1	Fasting glucose	rs2524299	11	61604782	FADS2	A	T	0.8773	0.804916	0.0261766	5.76923	NP	NP	FADS2 (lipid mediated)	No
Phosphatidylcholine diacyl 36:1	Fasting glucose	rs7102746	11	92666563	FAT3(dist=36928), MTNR1B(dist=36226)	T	C	0.4652	0.732574	0.0328408	-6.74419	NP	NP	MTNR1B	No
Phosphatidylcholine diacyl 36:1	Fasting glucose	rs10830963	11	92708710	MTNR1B	C	G	0.7304	0.412249	0.229908	-17.5556	NP	NP	MTNR1B	No
Phosphatidylcholine diacyl 36:1	Fasting glucose	rs17390909	12	97868654	RMST	C	G	0.9028	-0.550397	0.0228987	5.52239	NP	NP	(NA)	No
Phosphatidylcholine diacyl 38:3 (ESI-MS)	Fasting glucose	rs853770	2	169749841	SPC25(dist=2897), G6PC2(dist=7909)	T	C	0.3056	1.30296	0.0421445	7.38095	NP	NP	G6PC2	Yes
Phosphatidylcholine diacyl 38:3 (ESI-MS)	Fasting glucose	rs560887	2	169763148	G6PC2	T	C	0.3097	-0.320109	0.252022	-18.2927	NP	NP	G6PC2	Yes
Phosphatidylcholine diacyl 38:3 (ESI-MS)	Fasting glucose	rs6709087	2	169799010	ABCB11	A	G	0.7996	-1.24123	0.123354	-12.8	NP	NP	G6PC2	Yes
Phosphatidylcholine diacyl 38:3 (ESI-MS)	Fasting glucose	rs11717195	3	123082398	ADCY5	T	C	0.7249	0.463647	0.0279066	6.17021	NP	NP	ADCY5	Yes
Phosphatidylcholine diacyl 38:3 (ESI-MS)	Fasting glucose	rs10276674	7	14922007	DGKB(dist=40932), AGMO(dist=317936)	T	C	0.8216	-0.686899	0.0373884	-7.05882	NP	NP	DGKB (phospholipid mediated)	No
Phosphatidylcholine diacyl 38:3 (ESI-MS)	Fasting glucose	rs2191349	7	15064309	DGKB(dist=183234), AGMO(dist=175634)	T	G	0.5372	1.2593	0.0521899	8.33333	NP	NP	DGKB?	No
Phosphatidylcholine diacyl 38:3 (ESI-MS)	Fasting glucose	rs6975024	7	44231886	GCK(dist=2864), YKT6(dist=8692)	T	C	0.8177	-2.20273	0.121213	-12.6531	NP	NP	GCK	Yes
Phosphatidylcholine diacyl 38:3 (ESI-MS)	Fasting glucose	rs11558471	8	118185733	SLC30A8	A	G	0.6689	0.737688	0.0334041	6.75	NP	NP	SLC30A8	No
Phosphatidylcholine diacyl 38:3 (ESI-MS)	Fasting glucose	rs10787312	10	113023966	ADRA2A(dist=183304), GPAM(dist=885656)	A	G	0.9066	-2.23414	0.0346173	6.77419	NP	NP	ADRA2A	No
Phosphatidylcholine diacyl 38:3 (ESI-MS)	Fasting glucose	rs12805422	11	45839889	SLC35C1(dist=5322), CRY2(dist=28780)	A	G	0.5763	-1.30054	0.027813	-6.21622	NP	NP	CRY2, MAPK8IP1	No
Phosphatidylcholine diacyl 38:3 (ESI-MS)	Fasting glucose	rs2524299	11	61604782	FADS2	A	T	0.8773	2.30781	0.0261766	5.76923	NP	NP	FADS2 (lipid mediated)	No
Phosphatidylcholine diacyl 38:3 (ESI-MS)	Fasting glucose	rs7102746	11	92666563	FAT3(dist=36928), MTNR1B(dist=36226)	T	C	0.4652	-0.116822	0.0328408	-6.74419	NP	NP	MTNR1B	No
Phosphatidylcholine diacyl 38:3 (ESI-MS)	Fasting glucose	rs10830963	11	92708710	MTNR1B	C	G	0.7304	-0.709556	0.229908	-17.5556	NP	NP	MTNR1B	No
Phosphatidylcholine diacyl 38:3 (ESI-MS)	Fasting glucose	rs17390909	12	97868654	RMST	C	G	0.9028	0.033143	0.0228987	5.52239	NP	NP	(NA)	No
Phosphatidylcholine diacyl 38:3 (LC-MS)	Fasting glucose	rs853770	2	169749841	SPC25(dist=2897), G6PC2(dist=7909)	T	C	0.3052	0.719298	0.0421445	7.38095	NP	NP	G6PC2	Yes
Phosphatidylcholine diacyl 38:3 (LC-MS)	Fasting glucose	rs560887	2	169763148	G6PC2	T	C	0.3093	1.63415	0.252022	-18.2927	NP	NP	G6PC2	Yes
Phosphatidylcholine diacyl 38:3 (LC-MS)	Fasting glucose	rs6709087	2	169799010	ABCB11	A	G	0.7983	-1.16463	0.123354	-12.8	NP	NP	G6PC2	Yes
Phosphatidylcholine diacyl 38:3 (LC-MS)	Fasting glucose	rs11717195	3	123082398	ADCY5	T	C	0.725	-0.342342	0.0279066	6.17021	NP	NP	ADCY5	Yes
Phosphatidylcholine diacyl 38:3 (LC-MS)	Fasting glucose	rs10276674	7	14922007	DGKB(dist=40932), AGMO(dist=317936)	T	C	0.8216	1.08779	0.0373884	-7.05882	NP	NP	DGKB (phospholipid mediated)	No
Phosphatidylcholine diacyl 38:3 (LC-MS)	Fasting glucose	rs2191349	7	15064309	DGKB(dist=183234), AGMO(dist=175634)	T	G	0.5373	-0.640394	0.0521899	8.33333	NP	NP	DGKB?	No
Phosphatidylcholine diacyl 38:3 (LC-MS)	Fasting glucose	rs6975024	7	44231886	GCK(dist=2864), YKT6(dist=8692)	T	C	0.8173	-0.57529	0.121213	-12.6531	NP	NP	GCK	Yes
Phosphatidylcholine diacyl 38:3 (LC-MS)	Fasting glucose	rs11558471	8	118185733	SLC30A8	A	G	0.6698	0.474419	0.0334041	6.75	NP	NP	SLC30A8	No
Phosphatidylcholine diacyl 38:3 (LC-MS)	Fasting glucose	rs10787312	10	113023966	ADRA2A(dist=183304), GPAM(dist=885656)	A	G	0.9067	-1.41813	0.0346173	6.77419	NP	NP	ADRA2A	No
Phosphatidylcholine diacyl 38:3 (LC-MS)	Fasting glucose	rs12805422	11	45839889	SLC35C1(dist=5322), CRY2(dist=28780)	A	G	0.5763	-2.39024	0.027813	-6.21622	NP	NP	CRY2, MAPK8IP1	No
Phosphatidylcholine diacyl 38:3 (LC-MS)	Fasting glucose	rs7102746	11	92666563	FAT3(dist=36928), MTNR1B(dist=36226)	T	C	0.4651	1.75445	0.0328408	-6.74419	NP	NP	MTNR1B	No
Phosphatidylcholine diacyl 38:3 (LC-MS)	Fasting glucose	rs10830963	11	92708710	MTNR1B	C	G	0.7309	0.431452	0.229908	-17.5556	NP	NP	MTNR1B	No
Phosphatidylcholine diacyl 38:3 (LC-MS)	Fasting glucose	rs17390909	12	97868654	RMST	C	G	0.9022	1.73219	0.0228987	5.52239	NP	NP	(NA)	No
Phosphatidylcholine diacyl 38:4 (ESI-MS)	Fasting glucose	rs780093	2	27742603	GCKR	T	C	0.3547	1.30867	0.0400332	-7.2973	NP	NP	GCKR	Yes
Phosphatidylcholine diacyl 38:4 (ESI-MS)	Fasting glucose	rs853770	2	169749841	SPC25(dist=2897), G6PC2(dist=7909)	T	C	0.3056	1.01617	0.0421445	7.38095	NP	NP	G6PC2	Yes
Phosphatidylcholine diacyl 38:4 (ESI-MS)	Fasting glucose	rs560887	2	169763148	G6PC2	T	C	0.3097	-1.4068	0.252022	-18.2927	NP	NP	G6PC2	Yes
Phosphatidylcholine diacyl 38:4 (ESI-MS)	Fasting glucose	rs6709087	2	169799010	ABCB11	A	G	0.7996	-1.15075	0.123354	-12.8	NP	NP	G6PC2	Yes
Phosphatidylcholine diacyl 38:4 (ESI-MS)	Fasting glucose	rs11717195	3	123082398	ADCY5	T	C	0.7249	-0.00196386	0.0279066	6.17021	NP	NP	ADCY5	Yes
Phosphatidylcholine diacyl 38:4 (ESI-MS)	Fasting glucose	rs10276674	7	14922007	DGKB(dist=40932), AGMO(dist=317936)	T	C	0.8216	-0.210138	0.0373884	-7.05882	NP	NP	DGKB (phospholipid mediated)	No
Phosphatidylcholine diacyl 38:4 (ESI-MS)	Fasting glucose	rs2191349	7	15064309	DGKB(dist=183234), AGMO(dist=175634)	T	G	0.5372	2.15673	0.0521899	8.33333	NP	NP	DGKB?	No
Phosphatidylcholine diacyl 38:4 (ESI-MS)	Fasting glucose	rs6975024	7	44231886	GCK(dist=2864), YKT6(dist=8692)	T	C	0.8177	-1.99009	0.121213	-12.6531	NP	NP	GCK	Yes
Phosphatidylcholine diacyl 38:4 (ESI-MS)	Fasting glucose	rs11558471	8	118185733	SLC30A8	A	G	0.6689	0.0385787	0.0334041	6.75	NP	NP	SLC30A8	No
Phosphatidylcholine diacyl 38:4 (ESI-MS)	Fasting glucose	rs10787312	10	113023966	ADRA2A(dist=183304), GPAM(dist=885656)	A	G	0.9066	-1.26121	0.0346173	6.77419	NP	NP	ADRA2A	No
Phosphatidylcholine diacyl 38:4 (ESI-MS)	Fasting glucose	rs12805422	11	45839889	SLC35C1(dist=5322), CRY2(dist=28780)	A	G	0.5763	-0.816685	0.027813	-6.21622	NP	NP	CRY2, MAPK8IP1	No
Phosphatidylcholine diacyl 38:4 (ESI-MS)	Fasting glucose	rs7102746	11	92666563	FAT3(dist=36928), MTNR1B(dist=36226)	T	C	0.4652	0.20541	0.0328408	-6.74419	NP	NP	MTNR1B	No
Phosphatidylcholine diacyl 38:4 (ESI-MS)	Fasting glucose	rs10830963	11	92708710	MTNR1B	C	G	0.7304	0.186335	0.229908	-17.5556	NP	NP	MTNR1B	No
Phosphatidylcholine diacyl 38:4 (ESI-MS)	Fasting glucose	rs17390909	12	97868654	RMST	C	G	0.9028	-0.821353	0.0228987	5.52239	NP	NP	(NA)	No
Phosphatidylcholine diacyl 38:4 (LC-MS)	Fasting glucose	rs780093	2	27742603	GCKR	T	C	0.3551	-0.260664	0.0400332	-7.2973	NP	NP	GCKR	Yes
Phosphatidylcholine diacyl 38:4 (LC-MS)	Fasting glucose	rs853770	2	169749841	SPC25(dist=2897), G6PC2(dist=7909)	T	C	0.3057	1.18662	0.0421445	7.38095	NP	NP	G6PC2	Yes
Phosphatidylcholine diacyl 38:4 (LC-MS)	Fasting glucose	rs560887	2	169763148	G6PC2	T	C	0.3095	1.76923	0.252022	-18.2927	NP	NP	G6PC2	Yes
Phosphatidylcholine diacyl 38:4 (LC-MS)	Fasting glucose	rs6709087	2	169799010	ABCB11	A	G	0.7993	-1.76147	0.123354	-12.8	NP	NP	G6PC2	Yes
Phosphatidylcholine diacyl 38:4 (LC-MS)	Fasting glucose	rs11717195	3	123082398	ADCY5	T	C	0.7256	0.941704	0.0279066	6.17021	NP	NP	ADCY5	Yes
Phosphatidylcholine diacyl 38:4 (LC-MS)	Fasting glucose	rs10276674	7	14922007	DGKB(dist=40932), AGMO(dist=317936)	T	C	0.8215	0.932584	0.0373884	-7.05882	NP	NP	DGKB (phospholipid mediated)	No
Phosphatidylcholine diacyl 38:4 (LC-MS)	Fasting glucose	rs2191349	7	15064309	DGKB(dist=183234), AGMO(dist=175634)	T	G	0.5373	0.770732	0.0521899	8.33333	NP	NP	DGKB?	No
Phosphatidylcholine diacyl 38:4 (LC-MS)	Fasting glucose	rs6975024	7	44231886	GCK(dist=2864), YKT6(dist=8692)	T	C	0.8175	-0.537879	0.121213	-12.6531	NP	NP	GCK	Yes
Phosphatidylcholine diacyl 38:4 (LC-MS)	Fasting glucose	rs11558471	8	118185733	SLC30A8	A	G	0.67	0.495413	0.0334041	6.75	NP	NP	SLC30A8	No
Phosphatidylcholine diacyl 38:4 (LC-MS)	Fasting glucose	rs10787312	10	113023966	ADRA2A(dist=183304), GPAM(dist=885656)	A	G	0.9065	-1.51685	0.0346173	6.77419	NP	NP	ADRA2A	No
Phosphatidylcholine diacyl 38:4 (LC-MS)	Fasting glucose	rs7102746	11	92666563	FAT3(dist=36928), MTNR1B(dist=36226)	T	C	0.4652	1.87943	0.0328408	-6.74419	NP	NP	MTNR1B	No
Phosphatidylcholine diacyl 38:4 (LC-MS)	Fasting glucose	rs10830963	11	92708710	MTNR1B	C	G	0.731	1.06977	0.229908	-17.5556	NP	NP	MTNR1B	No
Phosphatidylcholine diacyl 38:4 (LC-MS)	Fasting glucose	rs17390909	12	97868654	RMST	C	G	0.9025	0.792244	0.0228987	5.52239	NP	NP	(NA)	No
Phosphatidylcholine diacyl 40:4	Fasting glucose	rs560887	2	169763148	G6PC2	T	C	0.3094	0.473868	0.252022	-18.2927	NP	NP	G6PC2	Yes
Phosphatidylcholine diacyl 40:4	Fasting glucose	rs11717195	3	123082398	ADCY5	T	C	0.7248	0.381166	0.0279066	6.17021	NP	NP	ADCY5	Yes
Phosphatidylcholine diacyl 40:4	Fasting glucose	rs10276674	7	14922007	DGKB(dist=40932), AGMO(dist=317936)	T	C	0.8215	0.67803	0.0373884	-7.05882	NP	NP	DGKB (phospholipid mediated)	No
Phosphatidylcholine diacyl 40:4	Fasting glucose	rs2191349	7	15064309	DGKB(dist=183234), AGMO(dist=175634)	T	G	0.5373	0.495098	0.0521899	8.33333	NP	NP	DGKB?	No
Phosphatidylcholine diacyl 40:4	Fasting glucose	rs6975024	7	44231886	GCK(dist=2864), YKT6(dist=8692)	T	C	0.8175	-1.5687	0.121213	-12.6531	NP	NP	GCK	Yes
Phosphatidylcholine diacyl 40:4	Fasting glucose	rs11558471	8	118185733	SLC30A8	A	G	0.6693	0.290323	0.0334041	6.75	NP	NP	SLC30A8	No
Phosphatidylcholine diacyl 40:4	Fasting glucose	rs10787312	10	113023966	ADRA2A(dist=183304), GPAM(dist=885656)	A	G	0.9065	-1.78736	0.0346173	6.77419	NP	NP	ADRA2A	No
Phosphatidylcholine diacyl 40:4	Fasting glucose	rs12805422	11	45839889	SLC35C1(dist=5322), CRY2(dist=28780)	A	G	0.5763	-1.95122	0.027813	-6.21622	NP	NP	CRY2, MAPK8IP1	No
Phosphatidylcholine diacyl 40:4	Fasting glucose	rs7102746	11	92666563	FAT3(dist=36928), MTNR1B(dist=36226)	T	C	0.4651	1.68459	0.0328408	-6.74419	NP	NP	MTNR1B	No
Phosphatidylcholine diacyl 40:4	Fasting glucose	rs10830963	11	92708710	MTNR1B	C	G	0.7307	1.42972	0.229908	-17.5556	NP	NP	MTNR1B	No
Phosphatidylcholine diacyl 40:4	Fasting glucose	rs17390909	12	97868654	RMST	C	G	0.9023	1.46927	0.0228987	5.52239	NP	NP	(NA)	No
Phosphatidylcholine diacyl 40:6	Fasting glucose	rs780093	2	27742603	GCKR	T	C	0.3547	3.13161	0.0400332	-7.2973	NP	NP	GCKR	Yes
Phosphatidylcholine diacyl 40:6	Fasting glucose	rs853770	2	169749841	SPC25(dist=2897), G6PC2(dist=7909)	T	C	0.3056	1.36212	0.0421445	7.38095	NP	NP	G6PC2	Yes
Phosphatidylcholine diacyl 40:6	Fasting glucose	rs560887	2	169763148	G6PC2	T	C	0.3097	-0.110497	0.252022	-18.2927	NP	NP	G6PC2	Yes
Phosphatidylcholine diacyl 40:6	Fasting glucose	rs6709087	2	169799010	ABCB11	A	G	0.7996	-0.68767	0.123354	-12.8	NP	NP	G6PC2	Yes
Phosphatidylcholine diacyl 40:6	Fasting glucose	rs11717195	3	123082398	ADCY5	T	C	0.7249	-1.52585	0.0279066	6.17021	NP	NP	ADCY5	Yes
Phosphatidylcholine diacyl 40:6	Fasting glucose	rs10276674	7	14922007	DGKB(dist=40932), AGMO(dist=317936)	T	C	0.8216	-0.15003	0.0373884	-7.05882	NP	NP	DGKB (phospholipid mediated)	No
Phosphatidylcholine diacyl 40:6	Fasting glucose	rs2191349	7	15064309	DGKB(dist=183234), AGMO(dist=175634)	T	G	0.5372	1.38857	0.0521899	8.33333	NP	NP	DGKB?	No
Phosphatidylcholine diacyl 40:6	Fasting glucose	rs6975024	7	44231886	GCK(dist=2864), YKT6(dist=8692)	T	C	0.8177	-0.0528607	0.121213	-12.6531	NP	NP	GCK	Yes
Phosphatidylcholine diacyl 40:6	Fasting glucose	rs11558471	8	118185733	SLC30A8	A	G	0.6689	0.895522	0.0334041	6.75	NP	NP	SLC30A8	No
Phosphatidylcholine diacyl 40:6	Fasting glucose	rs10787312	10	113023966	ADRA2A(dist=183304), GPAM(dist=885656)	A	G	0.9066	-0.241123	0.0346173	6.77419	NP	NP	ADRA2A	No
Phosphatidylcholine diacyl 40:6	Fasting glucose	rs12805422	11	45839889	SLC35C1(dist=5322), CRY2(dist=28780)	A	G	0.5763	-0.738332	0.027813	-6.21622	NP	NP	CRY2, MAPK8IP1	No
Phosphatidylcholine diacyl 40:6	Fasting glucose	rs7102746	11	92666563	FAT3(dist=36928), MTNR1B(dist=36226)	T	C	0.4652	-0.527361	0.0328408	-6.74419	NP	NP	MTNR1B	No
Phosphatidylcholine diacyl 40:6	Fasting glucose	rs10830963	11	92708710	MTNR1B	C	G	0.7304	-1.13392	0.229908	-17.5556	NP	NP	MTNR1B	No
Phosphatidylcholine diacyl 40:6	Fasting glucose	rs17390909	12	97868654	RMST	C	G	0.9028	-0.893706	0.0228987	5.52239	NP	NP	(NA)	No
Phosphatidylcholine diacyl 42:0	Fasting glucose	rs780093	2	27742603	GCKR	T	C	0.3742	-0.769231	0.0400332	-7.2973	NP	NP	GCKR	Yes
Phosphatidylcholine diacyl 42:0	Fasting glucose	rs560887	2	169763148	G6PC2	T	C	0.3223	2.12963	0.252022	-18.2927	NP	NP	G6PC2	Yes
Phosphatidylcholine diacyl 42:0	Fasting glucose	rs6709087	2	169799010	ABCB11	A	G	0.7929	1.01562	0.123354	-12.8	NP	NP	G6PC2	Yes
Phosphatidylcholine diacyl 42:0	Fasting glucose	rs11717195	3	123082398	ADCY5	T	C	0.762	0.870968	0.0279066	6.17021	NP	NP	ADCY5	Yes
Phosphatidylcholine diacyl 42:0	Fasting glucose	rs10276674	7	14922007	DGKB(dist=40932), AGMO(dist=317936)	T	C	0.8268	-0.794118	0.0373884	-7.05882	NP	NP	DGKB (phospholipid mediated)	No
Phosphatidylcholine diacyl 42:0	Fasting glucose	rs2191349	7	15064309	DGKB(dist=183234), AGMO(dist=175634)	T	G	0.5376	0.156863	0.0521899	8.33333	NP	NP	DGKB?	No
Phosphatidylcholine diacyl 42:0	Fasting glucose	rs6975024	7	44231886	GCK(dist=2864), YKT6(dist=8692)	T	C	0.8337	-1.43939	0.121213	-12.6531	NP	NP	GCK	Yes
Phosphatidylcholine diacyl 42:0	Fasting glucose	rs11558471	8	118185733	SLC30A8	A	G	0.6788	-0.290909	0.0334041	6.75	NP	NP	SLC30A8	No
Phosphatidylcholine diacyl 42:0	Fasting glucose	rs10787312	10	113023966	ADRA2A(dist=183304), GPAM(dist=885656)	A	G	0.8932	1.51765	0.0346173	6.77419	NP	NP	ADRA2A	No
Phosphatidylcholine diacyl 42:0	Fasting glucose	rs12805422	11	45839889	SLC35C1(dist=5322), CRY2(dist=28780)	A	G	0.5595	-0.773585	0.027813	-6.21622	NP	NP	CRY2, MAPK8IP1	No
Phosphatidylcholine diacyl 42:0	Fasting glucose	rs7102746	11	92666563	FAT3(dist=36928), MTNR1B(dist=36226)	T	C	0.4771	0.264706	0.0328408	-6.74419	NP	NP	MTNR1B	No
Phosphatidylcholine diacyl 42:0	Fasting glucose	rs10830963	11	92708710	MTNR1B	C	G	0.7237	-1.46032	0.229908	-17.5556	NP	NP	MTNR1B	No
Phosphatidylcholine diacyl 42:0	Fasting glucose	rs17390909	12	97868654	RMST	C	G	0.8944	-0.0470588	0.0228987	5.52239	NP	NP	(NA)	No
Phosphatidylethanolamine 32:2	Fasting glucose	rs780093	2	27742603	GCKR	T	C	0.3553	2	0.0400332	-7.2973	NP	NP	GCKR	Yes
Phosphatidylethanolamine 32:2	Fasting glucose	rs853770	2	169749841	SPC25(dist=2897), G6PC2(dist=7909)	T	C	0.3057	-1.66667	0.0421445	7.38095	NP	NP	G6PC2	Yes
Phosphatidylethanolamine 32:2	Fasting glucose	rs560887	2	169763148	G6PC2	T	C	0.3106	0.111111	0.252022	-18.2927	NP	NP	G6PC2	Yes
Phosphatidylethanolamine 32:2	Fasting glucose	rs6709087	2	169799010	ABCB11	A	G	0.799	0.818182	0.123354	-12.8	NP	NP	G6PC2	Yes
Phosphatidylethanolamine 32:2	Fasting glucose	rs11717195	3	123082398	ADCY5	T	C	0.726	2	0.0279066	6.17021	NP	NP	ADCY5	Yes
Phosphatidylethanolamine 32:2	Fasting glucose	rs10276674	7	14922007	DGKB(dist=40932), AGMO(dist=317936)	T	C	0.8214	-0.363636	0.0373884	-7.05882	NP	NP	DGKB (phospholipid mediated)	No
Phosphatidylethanolamine 32:2	Fasting glucose	rs2191349	7	15064309	DGKB(dist=183234), AGMO(dist=175634)	T	G	0.5367	1.88889	0.0521899	8.33333	NP	NP	DGKB?	No
Phosphatidylethanolamine 32:2	Fasting glucose	rs6975024	7	44231886	GCK(dist=2864), YKT6(dist=8692)	T	C	0.8169	1.4	0.121213	-12.6531	NP	NP	GCK	Yes
Phosphatidylethanolamine 32:2	Fasting glucose	rs11558471	8	118185733	SLC30A8	A	G	0.6711	-1.11111	0.0334041	6.75	NP	NP	SLC30A8	No
Phosphatidylethanolamine 32:2	Fasting glucose	rs10787312	10	113023966	ADRA2A(dist=183304), GPAM(dist=885656)	A	G	0.9064	0	0.0346173	6.77419	NP	NP	ADRA2A	No
Phosphatidylethanolamine 32:2	Fasting glucose	rs12805422	11	45839889	SLC35C1(dist=5322), CRY2(dist=28780)	A	G	0.5766	0.625	0.027813	-6.21622	NP	NP	CRY2, MAPK8IP1	No
Phosphatidylethanolamine 32:2	Fasting glucose	rs7102746	11	92666563	FAT3(dist=36928), MTNR1B(dist=36226)	T	C	0.4662	-0.714286	0.0328408	-6.74419	NP	NP	MTNR1B	No
Phosphatidylethanolamine 32:2	Fasting glucose	rs10830963	11	92708710	MTNR1B	C	G	0.731	-0.727273	0.229908	-17.5556	NP	NP	MTNR1B	No
Phosphatidylethanolamine 32:2	Fasting glucose	rs17390909	12	97868654	RMST	C	G	0.9019	0.266667	0.0228987	5.52239	NP	NP	(NA)	No
Phosphatidylethanolamine 38:4	Fasting glucose	rs780093	2	27742603	GCKR	T	C	0.3547	2.60729	0.0400332	-7.2973	NP	NP	GCKR	Yes
Phosphatidylethanolamine 38:4	Fasting glucose	rs853770	2	169749841	SPC25(dist=2897), G6PC2(dist=7909)	T	C	0.3056	0.138577	0.0421445	7.38095	NP	NP	G6PC2	Yes
Phosphatidylethanolamine 38:4	Fasting glucose	rs560887	2	169763148	G6PC2	T	C	0.3097	-1.2218	0.252022	-18.2927	NP	NP	G6PC2	Yes
Phosphatidylethanolamine 38:4	Fasting glucose	rs6709087	2	169799010	ABCB11	A	G	0.7996	0.29393	0.123354	-12.8	NP	NP	G6PC2	Yes
Phosphatidylethanolamine 38:4	Fasting glucose	rs11717195	3	123082398	ADCY5	T	C	0.7249	-0.420339	0.0279066	6.17021	NP	NP	ADCY5	Yes
Phosphatidylethanolamine 38:4	Fasting glucose	rs10276674	7	14922007	DGKB(dist=40932), AGMO(dist=317936)	T	C	0.8216	0.0192308	0.0373884	-7.05882	NP	NP	DGKB (phospholipid mediated)	No
Phosphatidylethanolamine 38:4	Fasting glucose	rs2191349	7	15064309	DGKB(dist=183234), AGMO(dist=175634)	T	G	0.5372	0.694215	0.0521899	8.33333	NP	NP	DGKB?	No
Phosphatidylethanolamine 38:4	Fasting glucose	rs6975024	7	44231886	GCK(dist=2864), YKT6(dist=8692)	T	C	0.8177	-2.53947	0.121213	-12.6531	NP	NP	GCK	Yes
Phosphatidylethanolamine 38:4	Fasting glucose	rs11558471	8	118185733	SLC30A8	A	G	0.6689	0.738462	0.0334041	6.75	NP	NP	SLC30A8	No
Phosphatidylethanolamine 38:4	Fasting glucose	rs10787312	10	113023966	ADRA2A(dist=183304), GPAM(dist=885656)	A	G	0.9066	-1.23094	0.0346173	6.77419	NP	NP	ADRA2A	No
Phosphatidylethanolamine 38:4	Fasting glucose	rs12805422	11	45839889	SLC35C1(dist=5322), CRY2(dist=28780)	A	G	0.5763	0.555556	0.027813	-6.21622	NP	NP	CRY2, MAPK8IP1	No
Phosphatidylethanolamine 38:4	Fasting glucose	rs7102746	11	92666563	FAT3(dist=36928), MTNR1B(dist=36226)	T	C	0.4652	-0.519481	0.0328408	-6.74419	NP	NP	MTNR1B	No
Phosphatidylethanolamine 38:4	Fasting glucose	rs10830963	11	92708710	MTNR1B	C	G	0.7304	0.00675676	0.229908	-17.5556	NP	NP	MTNR1B	No
Phosphatidylethanolamine 38:4	Fasting glucose	rs17390909	12	97868654	RMST	C	G	0.9028	-1.63855	0.0228987	5.52239	NP	NP	(NA)	No
Phosphatidylethanolamine 40:4	Fasting glucose	rs780093	2	27742603	GCKR	T	C	0.3553	2.81148	0.0400332	-7.2973	NP	NP	GCKR	Yes
Phosphatidylethanolamine 40:4	Fasting glucose	rs853770	2	169749841	SPC25(dist=2897), G6PC2(dist=7909)	T	C	0.3057	0.431818	0.0421445	7.38095	NP	NP	G6PC2	Yes
Phosphatidylethanolamine 40:4	Fasting glucose	rs560887	2	169763148	G6PC2	T	C	0.3106	-0.8327	0.252022	-18.2927	NP	NP	G6PC2	Yes
Phosphatidylethanolamine 40:4	Fasting glucose	rs6709087	2	169799010	ABCB11	A	G	0.799	0.897106	0.123354	-12.8	NP	NP	G6PC2	Yes
Phosphatidylethanolamine 40:4	Fasting glucose	rs11717195	3	123082398	ADCY5	T	C	0.726	0.34589	0.0279066	6.17021	NP	NP	ADCY5	Yes
Phosphatidylethanolamine 40:4	Fasting glucose	rs10276674	7	14922007	DGKB(dist=40932), AGMO(dist=317936)	T	C	0.8214	-0.0487013	0.0373884	-7.05882	NP	NP	DGKB (phospholipid mediated)	No
Phosphatidylethanolamine 40:4	Fasting glucose	rs2191349	7	15064309	DGKB(dist=183234), AGMO(dist=175634)	T	G	0.5367	1.03333	0.0521899	8.33333	NP	NP	DGKB?	No
Phosphatidylethanolamine 40:4	Fasting glucose	rs6975024	7	44231886	GCK(dist=2864), YKT6(dist=8692)	T	C	0.8169	-2.2392	0.121213	-12.6531	NP	NP	GCK	Yes
Phosphatidylethanolamine 40:4	Fasting glucose	rs11558471	8	118185733	SLC30A8	A	G	0.6711	-0.392996	0.0334041	6.75	NP	NP	SLC30A8	No
Phosphatidylethanolamine 40:4	Fasting glucose	rs10787312	10	113023966	ADRA2A(dist=183304), GPAM(dist=885656)	A	G	0.9064	-0.00680272	0.0346173	6.77419	NP	NP	ADRA2A	No
Phosphatidylethanolamine 40:4	Fasting glucose	rs12805422	11	45839889	SLC35C1(dist=5322), CRY2(dist=28780)	A	G	0.5766	0.751037	0.027813	-6.21622	NP	NP	CRY2, MAPK8IP1	No
Phosphatidylethanolamine 40:4	Fasting glucose	rs2524299	11	61604782	FADS2	A	T	0.8773	2.15976	0.0261766	5.76923	NP	NP	FADS2 (lipid mediated)	No
Phosphatidylethanolamine 40:4	Fasting glucose	rs7102746	11	92666563	FAT3(dist=36928), MTNR1B(dist=36226)	T	C	0.4662	-0.0104987	0.0328408	-6.74419	NP	NP	MTNR1B	No
Phosphatidylethanolamine 40:4	Fasting glucose	rs10830963	11	92708710	MTNR1B	C	G	0.731	0.489726	0.229908	-17.5556	NP	NP	MTNR1B	No
Phosphatidylethanolamine 40:4	Fasting glucose	rs17390909	12	97868654	RMST	C	G	0.9019	-0.788835	0.0228987	5.52239	NP	NP	(NA)	No
Phosphatidylethanolamine alkyl-acyl 38:7	Fasting glucose	rs780093	2	27742603	GCKR	T	C	0.3547	1.07819	0.0400332	-7.2973	NP	NP	GCKR	Yes
Phosphatidylethanolamine alkyl-acyl 38:7	Fasting glucose	rs853770	2	169749841	SPC25(dist=2897), G6PC2(dist=7909)	T	C	0.3056	0.662879	0.0421445	7.38095	NP	NP	G6PC2	Yes
Phosphatidylethanolamine alkyl-acyl 38:7	Fasting glucose	rs560887	2	169763148	G6PC2	T	C	0.3097	-0.589354	0.252022	-18.2927	NP	NP	G6PC2	Yes
Phosphatidylethanolamine alkyl-acyl 38:7	Fasting glucose	rs6709087	2	169799010	ABCB11	A	G	0.7996	-1.19741	0.123354	-12.8	NP	NP	G6PC2	Yes
Phosphatidylethanolamine alkyl-acyl 38:7	Fasting glucose	rs11717195	3	123082398	ADCY5	T	C	0.7249	-1.83849	0.0279066	6.17021	NP	NP	ADCY5	Yes
Phosphatidylethanolamine alkyl-acyl 38:7	Fasting glucose	rs10276674	7	14922007	DGKB(dist=40932), AGMO(dist=317936)	T	C	0.8216	-0.214286	0.0373884	-7.05882	NP	NP	DGKB (phospholipid mediated)	No
Phosphatidylethanolamine alkyl-acyl 38:7	Fasting glucose	rs2191349	7	15064309	DGKB(dist=183234), AGMO(dist=175634)	T	G	0.5372	-0.100418	0.0521899	8.33333	NP	NP	DGKB?	No
Phosphatidylethanolamine alkyl-acyl 38:7	Fasting glucose	rs6975024	7	44231886	GCK(dist=2864), YKT6(dist=8692)	T	C	0.8177	-0.156146	0.121213	-12.6531	NP	NP	GCK	Yes
Phosphatidylethanolamine alkyl-acyl 38:7	Fasting glucose	rs11558471	8	118185733	SLC30A8	A	G	0.6689	0.714844	0.0334041	6.75	NP	NP	SLC30A8	No
Phosphatidylethanolamine alkyl-acyl 38:7	Fasting glucose	rs10787312	10	113023966	ADRA2A(dist=183304), GPAM(dist=885656)	A	G	0.9066	0.1959	0.0346173	6.77419	NP	NP	ADRA2A	No
Phosphatidylethanolamine alkyl-acyl 38:7	Fasting glucose	rs12805422	11	45839889	SLC35C1(dist=5322), CRY2(dist=28780)	A	G	0.5763	0.329167	0.027813	-6.21622	NP	NP	CRY2, MAPK8IP1	No
Phosphatidylethanolamine alkyl-acyl 38:7	Fasting glucose	rs2524299	11	61604782	FADS2	A	T	0.8773	0.652819	0.0261766	5.76923	NP	NP	FADS2 (lipid mediated)	No
Phosphatidylethanolamine alkyl-acyl 38:7	Fasting glucose	rs7102746	11	92666563	FAT3(dist=36928), MTNR1B(dist=36226)	T	C	0.4652	-0.213158	0.0328408	-6.74419	NP	NP	MTNR1B	No
Phosphatidylethanolamine alkyl-acyl 38:7	Fasting glucose	rs10830963	11	92708710	MTNR1B	C	G	0.7304	0.452055	0.229908	-17.5556	NP	NP	MTNR1B	No
Phosphatidylethanolamine alkyl-acyl 38:7	Fasting glucose	rs17390909	12	97868654	RMST	C	G	0.9028	-1.04854	0.0228987	5.52239	NP	NP	(NA)	No
Alanine	Fasting glucose	rs853770	2	169749841	SPC25(dist=2897), G6PC2(dist=7909)	C	T	0.783107	-0.686673	0.0421445	-7.38095	NP	NP	G6PC2	Yes
Alanine	Fasting glucose	rs560887	2	169763148	G6PC2	C	T	0.699305	0.209834	0.252022	18.2927	NP	NP	G6PC2	Yes
Alanine	Fasting glucose	rs6709087	2	169799010	ABCB11	G	A	0.163055	0.31142	0.123354	12.8	NP	NP	G6PC2	Yes
Alanine	Fasting glucose	rs11717195	3	123082398	ADCY5	C	T	0.193246	-3.31293	0.0279066	-6.17021	NP	NP	ADCY5	Yes
Alanine	Fasting glucose	rs10276674	7	14922007	DGKB(dist=40932), AGMO(dist=317936)	C	T	0.206129	0.327266	0.0373884	7.05882	NP	NP	DGKB (phospholipid mediated)	No
Alanine	Fasting glucose	rs2191349	7	15064309	DGKB(dist=183234), AGMO(dist=175634)	T	G	0.489533	-0.223359	0.0521899	8.33333	NP	NP	DGKB?	No
Alanine	Fasting glucose	rs6975024	7	44231886	GCK(dist=2864), YKT6(dist=8692)	C	T	0.129707	1.2529	0.121213	12.6531	NP	NP	GCK	Yes
Alanine	Fasting glucose	rs11558471	8	118185733	SLC30A8	G	A	0.354447	-2.34211	0.0334041	-6.75	NP	NP	SLC30A8	No
Alanine	Fasting glucose	rs10787312	10	113023966	ADRA2A(dist=183304), GPAM(dist=885656)	A	G	0.899865	-1.32316	0.0346173	6.77419	NP	NP	ADRA2A	No
Alanine	Fasting glucose	rs12805422	11	45839889	SLC35C1(dist=5322), CRY2(dist=28780)	A	G	0.515289	-1.54057	0.027813	-6.21622	NP	NP	CRY2, MAPK8IP1	No
Alanine	Fasting glucose	rs2524299	11	61604782	FADS2	T	A	0.224451	-0.838498	0.0261766	-5.76923	NP	NP	FADS2 (lipid mediated)	No
Alanine	Fasting glucose	rs7102746	11	92666563	FAT3(dist=36928), MTNR1B(dist=36226)	C	T	0.558853	0.365844	0.0328408	6.74419	NP	NP	MTNR1B	No
Alanine	Fasting glucose	rs10830963	11	92708710	MTNR1B	G	C	0.320271	0.964943	0.229908	17.5556	NP	NP	MTNR1B	No
Alanine	Fasting glucose	rs17390909	12	97868654	RMST	G	C	0.104371	0.320114	0.0228987	-5.52239	NP	NP	(NA)	No
Isoleucine	Fasting glucose	rs853770	2	169749841	SPC25(dist=2897), G6PC2(dist=7909)	C	T	0.783149	-0.899199	0.0421445	-7.38095	NP	NP	G6PC2	Yes
Isoleucine	Fasting glucose	rs560887	2	169763148	G6PC2	C	T	0.699424	-0.956158	0.252022	18.2927	NP	NP	G6PC2	Yes
Isoleucine	Fasting glucose	rs6709087	2	169799010	ABCB11	G	A	0.163121	-0.543319	0.123354	12.8	NP	NP	G6PC2	Yes
Isoleucine	Fasting glucose	rs11717195	3	123082398	ADCY5	C	T	0.193235	0.0868041	0.0279066	-6.17021	NP	NP	ADCY5	Yes
Isoleucine	Fasting glucose	rs10276674	7	14922007	DGKB(dist=40932), AGMO(dist=317936)	C	T	0.206134	0.39353	0.0373884	7.05882	NP	NP	DGKB (phospholipid mediated)	No
Isoleucine	Fasting glucose	rs2191349	7	15064309	DGKB(dist=183234), AGMO(dist=175634)	T	G	0.489503	0.169117	0.0521899	8.33333	NP	NP	DGKB?	No
Isoleucine	Fasting glucose	rs6975024	7	44231886	GCK(dist=2864), YKT6(dist=8692)	C	T	0.129673	0.938035	0.121213	12.6531	NP	NP	GCK	Yes
Isoleucine	Fasting glucose	rs11558471	8	118185733	SLC30A8	G	A	0.354442	-0.0432438	0.0334041	-6.75	NP	NP	SLC30A8	No
Isoleucine	Fasting glucose	rs10787312	10	113023966	ADRA2A(dist=183304), GPAM(dist=885656)	A	G	0.899976	-0.800574	0.0346173	6.77419	NP	NP	ADRA2A	No
Isoleucine	Fasting glucose	rs12805422	11	45839889	SLC35C1(dist=5322), CRY2(dist=28780)	A	G	0.515298	0.252914	0.027813	-6.21622	NP	NP	CRY2, MAPK8IP1	No
Isoleucine	Fasting glucose	rs2524299	11	61604782	FADS2	T	A	0.224481	1.93371	0.0261766	-5.76923	NP	NP	FADS2 (lipid mediated)	No
Isoleucine	Fasting glucose	rs7102746	11	92666563	FAT3(dist=36928), MTNR1B(dist=36226)	C	T	0.558919	0.511803	0.0328408	6.74419	NP	NP	MTNR1B	No
Isoleucine	Fasting glucose	rs10830963	11	92708710	MTNR1B	G	C	0.320306	1.16636	0.229908	17.5556	NP	NP	MTNR1B	No
Isoleucine	Fasting glucose	rs17390909	12	97868654	RMST	G	C	0.104324	-0.84081	0.0228987	-5.52239	NP	NP	(NA)	No
Leucine	Fasting glucose	rs853770	2	169749841	SPC25(dist=2897), G6PC2(dist=7909)	C	T	0.783051	-0.126445	0.0421445	-7.38095	NP	NP	G6PC2	Yes
Leucine	Fasting glucose	rs560887	2	169763148	G6PC2	C	T	0.699285	-0.280219	0.252022	18.2927	NP	NP	G6PC2	Yes
Leucine	Fasting glucose	rs6709087	2	169799010	ABCB11	G	A	0.163107	-0.17717	0.123354	12.8	NP	NP	G6PC2	Yes
Leucine	Fasting glucose	rs11717195	3	123082398	ADCY5	C	T	0.193426	0.0680906	0.0279066	-6.17021	NP	NP	ADCY5	Yes
Leucine	Fasting glucose	rs10276674	7	14922007	DGKB(dist=40932), AGMO(dist=317936)	C	T	0.206129	0.594264	0.0373884	7.05882	NP	NP	DGKB (phospholipid mediated)	No
Leucine	Fasting glucose	rs2191349	7	15064309	DGKB(dist=183234), AGMO(dist=175634)	T	G	0.489708	0.869079	0.0521899	8.33333	NP	NP	DGKB?	No
Leucine	Fasting glucose	rs6975024	7	44231886	GCK(dist=2864), YKT6(dist=8692)	C	T	0.129862	0.297729	0.121213	12.6531	NP	NP	GCK	Yes
Leucine	Fasting glucose	rs11558471	8	118185733	SLC30A8	G	A	0.354091	-1.04512	0.0334041	-6.75	NP	NP	SLC30A8	No
Leucine	Fasting glucose	rs10787312	10	113023966	ADRA2A(dist=183304), GPAM(dist=885656)	A	G	0.899751	-0.863162	0.0346173	6.77419	NP	NP	ADRA2A	No
Leucine	Fasting glucose	rs12805422	11	45839889	SLC35C1(dist=5322), CRY2(dist=28780)	A	G	0.515271	-1.09584	0.027813	-6.21622	NP	NP	CRY2, MAPK8IP1	No
Leucine	Fasting glucose	rs2524299	11	61604782	FADS2	T	A	0.224201	1.22624	0.0261766	-5.76923	NP	NP	FADS2 (lipid mediated)	No
Leucine	Fasting glucose	rs7102746	11	92666563	FAT3(dist=36928), MTNR1B(dist=36226)	C	T	0.558808	-0.0350774	0.0328408	6.74419	NP	NP	MTNR1B	No
Leucine	Fasting glucose	rs10830963	11	92708710	MTNR1B	G	C	0.319989	1.25382	0.229908	17.5556	NP	NP	MTNR1B	No
Leucine	Fasting glucose	rs17390909	12	97868654	RMST	G	C	0.104284	-1.48242	0.0228987	-5.52239	NP	NP	(NA)	No
Phenylalanine	Fasting glucose	rs780093	2	27742603	GCKR	C	T	0.634708	-0.877578	0.0400332	7.2973	NP	NP	GCKR	Yes
Phenylalanine	Fasting glucose	rs853770	2	169749841	SPC25(dist=2897), G6PC2(dist=7909)	C	T	0.791746	0.772374	0.0421445	-7.38095	NP	NP	G6PC2	Yes
Phenylalanine	Fasting glucose	rs560887	2	169763148	G6PC2	C	T	0.69771	-0.588791	0.252022	18.2927	NP	NP	G6PC2	Yes
Phenylalanine	Fasting glucose	rs6709087	2	169799010	ABCB11	G	A	0.167003	-1.65556	0.123354	12.8	NP	NP	G6PC2	Yes
Phenylalanine	Fasting glucose	rs11717195	3	123082398	ADCY5	C	T	0.187208	0.9135	0.0279066	-6.17021	NP	NP	ADCY5	Yes
Phenylalanine	Fasting glucose	rs10276674	7	14922007	DGKB(dist=40932), AGMO(dist=317936)	C	T	0.207479	0.595499	0.0373884	7.05882	NP	NP	DGKB (phospholipid mediated)	No
Phenylalanine	Fasting glucose	rs2191349	7	15064309	DGKB(dist=183234), AGMO(dist=175634)	T	G	0.487753	1.92076	0.0521899	8.33333	NP	NP	DGKB?	No
Phenylalanine	Fasting glucose	rs6975024	7	44231886	GCK(dist=2864), YKT6(dist=8692)	C	T	0.127149	-0.531287	0.121213	12.6531	NP	NP	GCK	Yes
Phenylalanine	Fasting glucose	rs11558471	8	118185733	SLC30A8	G	A	0.354056	0.120913	0.0334041	-6.75	NP	NP	SLC30A8	No
Phenylalanine	Fasting glucose	rs10787312	10	113023966	ADRA2A(dist=183304), GPAM(dist=885656)	A	G	0.902381	-0.60674	0.0346173	6.77419	NP	NP	ADRA2A	No
Phenylalanine	Fasting glucose	rs12805422	11	45839889	SLC35C1(dist=5322), CRY2(dist=28780)	A	G	0.512222	-0.411796	0.027813	-6.21622	NP	NP	CRY2, MAPK8IP1	No
Phenylalanine	Fasting glucose	rs2524299	11	61604782	FADS2	T	A	0.23371	2.95321	0.0261766	-5.76923	NP	NP	FADS2 (lipid mediated)	No
Phenylalanine	Fasting glucose	rs7102746	11	92666563	FAT3(dist=36928), MTNR1B(dist=36226)	C	T	0.541892	-0.186584	0.0328408	6.74419	NP	NP	MTNR1B	No
Phenylalanine	Fasting glucose	rs10830963	11	92708710	MTNR1B	G	C	0.329295	-0.44662	0.229908	17.5556	NP	NP	MTNR1B	No
Phenylalanine	Fasting glucose	rs17390909	12	97868654	RMST	G	C	0.108179	-0.17427	0.0228987	-5.52239	NP	NP	(NA)	No
Tyrosine	Fasting glucose	rs780093	2	27742603	GCKR	C	T	0.636992	-0.143902	0.0400332	7.2973	NP	NP	GCKR	Yes
Tyrosine	Fasting glucose	rs853770	2	169749841	SPC25(dist=2897), G6PC2(dist=7909)	C	T	0.782753	0.00244767	0.0421445	-7.38095	NP	NP	G6PC2	Yes
Tyrosine	Fasting glucose	rs560887	2	169763148	G6PC2	C	T	0.699363	-0.101188	0.252022	18.2927	NP	NP	G6PC2	Yes
Tyrosine	Fasting glucose	rs6709087	2	169799010	ABCB11	G	A	0.162865	-1.29854	0.123354	12.8	NP	NP	G6PC2	Yes
Tyrosine	Fasting glucose	rs10276674	7	14922007	DGKB(dist=40932), AGMO(dist=317936)	C	T	0.206082	0.0761863	0.0373884	7.05882	NP	NP	DGKB (phospholipid mediated)	No
Tyrosine	Fasting glucose	rs2191349	7	15064309	DGKB(dist=183234), AGMO(dist=175634)	T	G	0.489522	1.64449	0.0521899	8.33333	NP	NP	DGKB?	No
Tyrosine	Fasting glucose	rs6975024	7	44231886	GCK(dist=2864), YKT6(dist=8692)	C	T	0.129861	0.501399	0.121213	12.6531	NP	NP	GCK	Yes
Tyrosine	Fasting glucose	rs11558471	8	118185733	SLC30A8	G	A	0.354458	-1.2921	0.0334041	-6.75	NP	NP	SLC30A8	No
Tyrosine	Fasting glucose	rs12805422	11	45839889	SLC35C1(dist=5322), CRY2(dist=28780)	A	G	0.515392	2.05859	0.027813	-6.21622	NP	NP	CRY2, MAPK8IP1	No
Tyrosine	Fasting glucose	rs2524299	11	61604782	FADS2	T	A	0.223932	1.58255	0.0261766	-5.76923	NP	NP	FADS2 (lipid mediated)	No
Tyrosine	Fasting glucose	rs7102746	11	92666563	FAT3(dist=36928), MTNR1B(dist=36226)	C	T	0.559768	-0.209055	0.0328408	6.74419	NP	NP	MTNR1B	No
Tyrosine	Fasting glucose	rs10830963	11	92708710	MTNR1B	G	C	0.319761	1.35835	0.229908	17.5556	NP	NP	MTNR1B	No
Tyrosine	Fasting glucose	rs17390909	12	97868654	RMST	G	C	0.104167	0.431339	0.0228987	-5.52239	NP	NP	(NA)	No
Valine(Biocrates)	Fasting glucose	rs780093	2	27742603	GCKR	T	C	0.3819	2.36842	0.0400332	-7.2973	NP	NP	GCKR	Yes
Valine(NMR-COMP)	Fasting glucose	rs853770	2	169749841	SPC25(dist=2897), G6PC2(dist=7909)	C	T	0.782743	0.187448	0.0421445	-7.38095	NP	NP	G6PC2	Yes
Valine(NMR-COMP)	Fasting glucose	rs560887	2	169763148	G6PC2	C	T	0.699435	0.689174	0.252022	18.2927	NP	NP	G6PC2	Yes
Valine(NMR-COMP)	Fasting glucose	rs6709087	2	169799010	ABCB11	G	A	0.162848	-0.336844	0.123354	12.8	NP	NP	G6PC2	Yes
Valine(NMR-COMP)	Fasting glucose	rs11717195	3	123082398	ADCY5	C	T	0.193666	-0.698241	0.0279066	-6.17021	NP	NP	ADCY5	Yes
Valine(NMR-COMP)	Fasting glucose	rs10276674	7	14922007	DGKB(dist=40932), AGMO(dist=317936)	C	T	0.206097	-0.481185	0.0373884	7.05882	NP	NP	DGKB (phospholipid mediated)	No
Valine(NMR-COMP)	Fasting glucose	rs2191349	7	15064309	DGKB(dist=183234), AGMO(dist=175634)	T	G	0.48947	1.42676	0.0521899	8.33333	NP	NP	DGKB?	No
Valine(NMR-COMP)	Fasting glucose	rs6975024	7	44231886	GCK(dist=2864), YKT6(dist=8692)	C	T	0.129886	0.869065	0.121213	12.6531	NP	NP	GCK	Yes
Valine(NMR-COMP)	Fasting glucose	rs11558471	8	118185733	SLC30A8	G	A	0.354374	-1.68577	0.0334041	-6.75	NP	NP	SLC30A8	No
Valine(NMR-COMP)	Fasting glucose	rs10787312	10	113023966	ADRA2A(dist=183304), GPAM(dist=885656)	A	G	0.899752	-2.19152	0.0346173	6.77419	NP	NP	ADRA2A	No
Valine(NMR-COMP)	Fasting glucose	rs12805422	11	45839889	SLC35C1(dist=5322), CRY2(dist=28780)	A	G	0.515359	-1.24891	0.027813	-6.21622	NP	NP	CRY2, MAPK8IP1	No
Valine(NMR-COMP)	Fasting glucose	rs2524299	11	61604782	FADS2	T	A	0.223998	0.298711	0.0261766	-5.76923	NP	NP	FADS2 (lipid mediated)	No
Valine(NMR-COMP)	Fasting glucose	rs7102746	11	92666563	FAT3(dist=36928), MTNR1B(dist=36226)	C	T	0.559666	0.659254	0.0328408	6.74419	NP	NP	MTNR1B	No
Valine(NMR-COMP)	Fasting glucose	rs10830963	11	92708710	MTNR1B	G	C	0.319613	2.1134	0.229908	17.5556	NP	NP	MTNR1B	No
Valine(NMR-COMP)	Fasting glucose	rs17390909	12	97868654	RMST	G	C	0.104101	-1.16554	0.0228987	-5.52239	NP	NP	(NA)	No
Valine(Biocrates)	Fasting glucose	rs853770	2	169749841	SPC25(dist=2897), G6PC2(dist=7909)	T	C	0.304	0.146341	0.0421445	7.38095	NP	NP	G6PC2	Yes
Valine(Biocrates)	Fasting glucose	rs560887	2	169763148	G6PC2	T	C	0.3272	0.878049	0.252022	-18.2927	NP	NP	G6PC2	Yes
Valine(Biocrates)	Fasting glucose	rs6709087	2	169799010	ABCB11	A	G	0.7869	-0.255319	0.123354	-12.8	NP	NP	G6PC2	Yes
Valine(Biocrates)	Fasting glucose	rs11717195	3	123082398	ADCY5	T	C	0.768	1.29167	0.0279066	6.17021	NP	NP	ADCY5	Yes
Valine(Biocrates)	Fasting glucose	rs10276674	7	14922007	DGKB(dist=40932), AGMO(dist=317936)	T	C	0.8277	-0.705882	0.0373884	-7.05882	NP	NP	DGKB (phospholipid mediated)	No
Valine(Biocrates)	Fasting glucose	rs2191349	7	15064309	DGKB(dist=183234), AGMO(dist=175634)	T	G	0.5414	-0.184211	0.0521899	8.33333	NP	NP	DGKB?	No
Valine(Biocrates)	Fasting glucose	rs6975024	7	44231886	GCK(dist=2864), YKT6(dist=8692)	T	C	0.832	-0.18	0.121213	-12.6531	NP	NP	GCK	Yes
Valine(Biocrates)	Fasting glucose	rs11558471	8	118185733	SLC30A8	A	G	0.6856	1.31707	0.0334041	6.75	NP	NP	SLC30A8	No
Valine(Biocrates)	Fasting glucose	rs10787312	10	113023966	ADRA2A(dist=183304), GPAM(dist=885656)	A	G	0.8905	-0.0952381	0.0346173	6.77419	NP	NP	ADRA2A	No
Valine(Biocrates)	Fasting glucose	rs12805422	11	45839889	SLC35C1(dist=5322), CRY2(dist=28780)	A	G	0.5583	-1.05128	0.027813	-6.21622	NP	NP	CRY2, MAPK8IP1	No
Valine(Biocrates)	Fasting glucose	rs2524299	11	61604782	FADS2	A	T	0.8795	-1	0.0261766	5.76923	NP	NP	FADS2 (lipid mediated)	No
Valine(Biocrates)	Fasting glucose	rs7102746	11	92666563	FAT3(dist=36928), MTNR1B(dist=36226)	T	C	0.458	-0.6	0.0328408	-6.74419	NP	NP	MTNR1B	No
Valine(Biocrates)	Fasting glucose	rs10830963	11	92708710	MTNR1B	C	G	0.7266	-1.67391	0.229908	-17.5556	NP	NP	MTNR1B	No
Valine(Biocrates)	Fasting glucose	rs17390909	12	97868654	RMST	C	G	0.8928	1.12903	0.0228987	5.52239	NP	NP	(NA)	No
Pyruvate/Oxaloacetate	Fasting glucose	rs853770	2	169749841	SPC25(dist=2897), G6PC2(dist=7909)	C	T	0.783171	-0.345818	0.0421445	-7.38095	NP	NP	G6PC2	Yes
Pyruvate/Oxaloacetate	Fasting glucose	rs560887	2	169763148	G6PC2	C	T	0.69947	0.301386	0.252022	18.2927	NP	NP	G6PC2	Yes
Pyruvate/Oxaloacetate	Fasting glucose	rs6709087	2	169799010	ABCB11	G	A	0.162713	-0.0286485	0.123354	12.8	NP	NP	G6PC2	Yes
Pyruvate/Oxaloacetate	Fasting glucose	rs11717195	3	123082398	ADCY5	C	T	0.194969	-1.3916	0.0279066	-6.17021	NP	NP	ADCY5	Yes
Pyruvate/Oxaloacetate	Fasting glucose	rs10276674	7	14922007	DGKB(dist=40932), AGMO(dist=317936)	C	T	0.206387	0.98146	0.0373884	7.05882	NP	NP	DGKB (phospholipid mediated)	No
Pyruvate/Oxaloacetate	Fasting glucose	rs2191349	7	15064309	DGKB(dist=183234), AGMO(dist=175634)	T	G	0.489593	-0.0493342	0.0521899	8.33333	NP	NP	DGKB?	No
Pyruvate/Oxaloacetate	Fasting glucose	rs6975024	7	44231886	GCK(dist=2864), YKT6(dist=8692)	C	T	0.129863	0.890781	0.121213	12.6531	NP	NP	GCK	Yes
Pyruvate/Oxaloacetate	Fasting glucose	rs11558471	8	118185733	SLC30A8	G	A	0.354766	-0.572703	0.0334041	-6.75	NP	NP	SLC30A8	No
Pyruvate/Oxaloacetate	Fasting glucose	rs10787312	10	113023966	ADRA2A(dist=183304), GPAM(dist=885656)	A	G	0.89974	-1.28211	0.0346173	6.77419	NP	NP	ADRA2A	No
Pyruvate/Oxaloacetate	Fasting glucose	rs12805422	11	45839889	SLC35C1(dist=5322), CRY2(dist=28780)	A	G	0.51559	0.684452	0.027813	-6.21622	NP	NP	CRY2, MAPK8IP1	No
Pyruvate/Oxaloacetate	Fasting glucose	rs2524299	11	61604782	FADS2	T	A	0.224027	-0.303626	0.0261766	-5.76923	NP	NP	FADS2 (lipid mediated)	No
Pyruvate/Oxaloacetate	Fasting glucose	rs7102746	11	92666563	FAT3(dist=36928), MTNR1B(dist=36226)	C	T	0.559749	-0.553204	0.0328408	6.74419	NP	NP	MTNR1B	No
Pyruvate/Oxaloacetate	Fasting glucose	rs10830963	11	92708710	MTNR1B	G	C	0.319479	1.07883	0.229908	17.5556	NP	NP	MTNR1B	No
Pyruvate/Oxaloacetate	Fasting glucose	rs17390909	12	97868654	RMST	G	C	0.104044	-0.245516	0.0228987	-5.52239	NP	NP	(NA)	No
Glycerol	Fasting glucose	rs853770	2	169749841	SPC25(dist=2897), G6PC2(dist=7909)	C	T	0.798314	-0.338888	0.0421445	-7.38095	NP	NP	G6PC2	Yes
Glycerol	Fasting glucose	rs560887	2	169763148	G6PC2	C	T	0.698957	0.38415	0.252022	18.2927	NP	NP	G6PC2	Yes
Glycerol	Fasting glucose	rs6709087	2	169799010	ABCB11	G	A	0.152943	0.409268	0.123354	12.8	NP	NP	G6PC2	Yes
Glycerol	Fasting glucose	rs11717195	3	123082398	ADCY5	C	T	0.199106	0.368691	0.0279066	-6.17021	NP	NP	ADCY5	Yes
Glycerol	Fasting glucose	rs10276674	7	14922007	DGKB(dist=40932), AGMO(dist=317936)	C	T	0.209229	0.183248	0.0373884	7.05882	NP	NP	DGKB (phospholipid mediated)	No
Glycerol	Fasting glucose	rs2191349	7	15064309	DGKB(dist=183234), AGMO(dist=175634)	T	G	0.481269	-0.0883247	0.0521899	8.33333	NP	NP	DGKB?	No
Glycerol	Fasting glucose	rs6975024	7	44231886	GCK(dist=2864), YKT6(dist=8692)	C	T	0.133983	0.587419	0.121213	12.6531	NP	NP	GCK	Yes
Glycerol	Fasting glucose	rs11558471	8	118185733	SLC30A8	G	A	0.355281	1.82639	0.0334041	-6.75	NP	NP	SLC30A8	No
Glycerol	Fasting glucose	rs10787312	10	113023966	ADRA2A(dist=183304), GPAM(dist=885656)	A	G	0.900431	1.15724	0.0346173	6.77419	NP	NP	ADRA2A	No
Glycerol	Fasting glucose	rs12805422	11	45839889	SLC35C1(dist=5322), CRY2(dist=28780)	A	G	0.51338	-2.10006	0.027813	-6.21622	NP	NP	CRY2, MAPK8IP1	No
Glycerol	Fasting glucose	rs2524299	11	61604782	FADS2	T	A	0.227518	0.805904	0.0261766	-5.76923	NP	NP	FADS2 (lipid mediated)	No
Glycerol	Fasting glucose	rs7102746	11	92666563	FAT3(dist=36928), MTNR1B(dist=36226)	C	T	0.565824	-0.401442	0.0328408	6.74419	NP	NP	MTNR1B	No
Glycerol	Fasting glucose	rs10830963	11	92708710	MTNR1B	G	C	0.319454	-0.781697	0.229908	17.5556	NP	NP	MTNR1B	No
Glycerol	Fasting glucose	rs17390909	12	97868654	RMST	G	C	0.100423	-0.366319	0.0228987	-5.52239	NP	NP	(NA)	No
Lactate	Fasting glucose	rs853770	2	169749841	SPC25(dist=2897), G6PC2(dist=7909)	C	T	0.811784	1.82173	0.0421445	-7.38095	NP	NP	G6PC2	Yes
Lactate	Fasting glucose	rs560887	2	169763148	G6PC2	C	T	0.695275	-1.34739	0.252022	18.2927	NP	NP	G6PC2	Yes
Lactate	Fasting glucose	rs6709087	2	169799010	ABCB11	G	A	0.150095	-0.450847	0.123354	12.8	NP	NP	G6PC2	Yes
Lactate	Fasting glucose	rs11717195	3	123082398	ADCY5	C	T	0.178209	-1.01189	0.0279066	-6.17021	NP	NP	ADCY5	Yes
Lactate	Fasting glucose	rs10276674	7	14922007	DGKB(dist=40932), AGMO(dist=317936)	C	T	0.219298	1.392	0.0373884	7.05882	NP	NP	DGKB (phospholipid mediated)	No
Lactate	Fasting glucose	rs2191349	7	15064309	DGKB(dist=183234), AGMO(dist=175634)	T	G	0.472505	0.241531	0.0521899	8.33333	NP	NP	DGKB?	No
Lactate	Fasting glucose	rs6975024	7	44231886	GCK(dist=2864), YKT6(dist=8692)	C	T	0.118411	-1.29754	0.121213	12.6531	NP	NP	GCK	Yes
Lactate	Fasting glucose	rs11558471	8	118185733	SLC30A8	G	A	0.364582	0.745785	0.0334041	-6.75	NP	NP	SLC30A8	No
Lactate	Fasting glucose	rs10787312	10	113023966	ADRA2A(dist=183304), GPAM(dist=885656)	A	G	0.901621	1.26506	0.0346173	6.77419	NP	NP	ADRA2A	No
Lactate	Fasting glucose	rs12805422	11	45839889	SLC35C1(dist=5322), CRY2(dist=28780)	A	G	0.494755	-0.471227	0.027813	-6.21622	NP	NP	CRY2, MAPK8IP1	No
Lactate	Fasting glucose	rs7102746	11	92666563	FAT3(dist=36928), MTNR1B(dist=36226)	C	T	0.542766	0.052806	0.0328408	6.74419	NP	NP	MTNR1B	No
Lactate	Fasting glucose	rs10830963	11	92708710	MTNR1B	G	C	0.340679	-0.345719	0.229908	17.5556	NP	NP	MTNR1B	No
Lactate	Fasting glucose	rs17390909	12	97868654	RMST	G	C	0.10397	1.46579	0.0228987	-5.52239	NP	NP	(NA)	No
Triglycerides 46:0	Fasting glucose	rs853770	2	169749841	SPC25(dist=2897), G6PC2(dist=7909)	T	C	0.3047	-0.765343	0.0421445	7.38095	NP	NP	G6PC2	Yes
Triglycerides 46:0	Fasting glucose	rs560887	2	169763148	G6PC2	T	C	0.3106	-0.207273	0.252022	-18.2927	NP	NP	G6PC2	Yes
Triglycerides 46:0	Fasting glucose	rs6709087	2	169799010	ABCB11	A	G	0.799	0.653251	0.123354	-12.8	NP	NP	G6PC2	Yes
Triglycerides 46:0	Fasting glucose	rs11717195	3	123082398	ADCY5	T	C	0.726	2.18349	0.0279066	6.17021	NP	NP	ADCY5	Yes
Triglycerides 46:0	Fasting glucose	rs10276674	7	14922007	DGKB(dist=40932), AGMO(dist=317936)	T	C	0.8215	0.616279	0.0373884	-7.05882	NP	NP	DGKB (phospholipid mediated)	No
Triglycerides 46:0	Fasting glucose	rs2191349	7	15064309	DGKB(dist=183234), AGMO(dist=175634)	T	G	0.5367	-1.74372	0.0521899	8.33333	NP	NP	DGKB?	No
Triglycerides 46:0	Fasting glucose	rs6975024	7	44231886	GCK(dist=2864), YKT6(dist=8692)	T	C	0.8169	-0.664032	0.121213	-12.6531	NP	NP	GCK	Yes
Triglycerides 46:0	Fasting glucose	rs11558471	8	118185733	SLC30A8	A	G	0.6711	-0.0377358	0.0334041	6.75	NP	NP	SLC30A8	No
Triglycerides 46:0	Fasting glucose	rs10787312	10	113023966	ADRA2A(dist=183304), GPAM(dist=885656)	A	G	0.9064	-2.0977	0.0346173	6.77419	NP	NP	ADRA2A	No
Triglycerides 46:0	Fasting glucose	rs12805422	11	45839889	SLC35C1(dist=5322), CRY2(dist=28780)	A	G	0.5766	-1.19704	0.027813	-6.21622	NP	NP	CRY2, MAPK8IP1	No
Triglycerides 46:0	Fasting glucose	rs2524299	11	61604782	FADS2	A	T	0.8773	0.630363	0.0261766	5.76923	NP	NP	FADS2 (lipid mediated)	No
Triglycerides 46:0	Fasting glucose	rs7102746	11	92666563	FAT3(dist=36928), MTNR1B(dist=36226)	T	C	0.4662	-1.17391	0.0328408	-6.74419	NP	NP	MTNR1B	No
Triglycerides 46:0	Fasting glucose	rs10830963	11	92708710	MTNR1B	C	G	0.731	0.253061	0.229908	-17.5556	NP	NP	MTNR1B	No
Triglycerides 46:0	Fasting glucose	rs17390909	12	97868654	RMST	C	G	0.9019	0.669516	0.0228987	5.52239	NP	NP	(NA)	No
Triglycerides 46:1	Fasting glucose	rs853770	2	169749841	SPC25(dist=2897), G6PC2(dist=7909)	T	C	0.306	-0.712727	0.0421445	7.38095	NP	NP	G6PC2	Yes
Triglycerides 46:1	Fasting glucose	rs560887	2	169763148	G6PC2	T	C	0.3097	0.275735	0.252022	-18.2927	NP	NP	G6PC2	Yes
Triglycerides 46:1	Fasting glucose	rs6709087	2	169799010	ABCB11	A	G	0.7986	0.479876	0.123354	-12.8	NP	NP	G6PC2	Yes
Triglycerides 46:1	Fasting glucose	rs11717195	3	123082398	ADCY5	T	C	0.7257	1.15207	0.0279066	6.17021	NP	NP	ADCY5	Yes
Triglycerides 46:1	Fasting glucose	rs10276674	7	14922007	DGKB(dist=40932), AGMO(dist=317936)	T	C	0.8215	-0.0625	0.0373884	-7.05882	NP	NP	DGKB (phospholipid mediated)	No
Triglycerides 46:1	Fasting glucose	rs2191349	7	15064309	DGKB(dist=183234), AGMO(dist=175634)	T	G	0.5372	-1.67513	0.0521899	8.33333	NP	NP	DGKB?	No
Triglycerides 46:1	Fasting glucose	rs6975024	7	44231886	GCK(dist=2864), YKT6(dist=8692)	T	C	0.8171	-0.933852	0.121213	-12.6531	NP	NP	GCK	Yes
Triglycerides 46:1	Fasting glucose	rs11558471	8	118185733	SLC30A8	A	G	0.6707	0.136792	0.0334041	6.75	NP	NP	SLC30A8	No
Triglycerides 46:1	Fasting glucose	rs10787312	10	113023966	ADRA2A(dist=183304), GPAM(dist=885656)	A	G	0.9065	-2.15029	0.0346173	6.77419	NP	NP	ADRA2A	No
Triglycerides 46:1	Fasting glucose	rs12805422	11	45839889	SLC35C1(dist=5322), CRY2(dist=28780)	A	G	0.5765	-1.52736	0.027813	-6.21622	NP	NP	CRY2, MAPK8IP1	No
Triglycerides 46:1	Fasting glucose	rs2524299	11	61604782	FADS2	A	T	0.878	0.302326	0.0261766	5.76923	NP	NP	FADS2 (lipid mediated)	No
Triglycerides 46:1	Fasting glucose	rs7102746	11	92666563	FAT3(dist=36928), MTNR1B(dist=36226)	T	C	0.4646	0.0777778	0.0328408	-6.74419	NP	NP	MTNR1B	No
Triglycerides 46:1	Fasting glucose	rs10830963	11	92708710	MTNR1B	C	G	0.7294	1.09917	0.229908	-17.5556	NP	NP	MTNR1B	No
Triglycerides 46:1	Fasting glucose	rs17390909	12	97868654	RMST	C	G	0.9022	0.74928	0.0228987	5.52239	NP	NP	(NA)	No
Triglycerides 48:0	Fasting glucose	rs853770	2	169749841	SPC25(dist=2897), G6PC2(dist=7909)	T	C	0.3059	-0.294118	0.0421445	7.38095	NP	NP	G6PC2	Yes
Triglycerides 48:0	Fasting glucose	rs560887	2	169763148	G6PC2	T	C	0.3095	-0.0522388	0.252022	-18.2927	NP	NP	G6PC2	Yes
Triglycerides 48:0	Fasting glucose	rs6709087	2	169799010	ABCB11	A	G	0.7986	0.0714286	0.123354	-12.8	NP	NP	G6PC2	Yes
Triglycerides 48:0	Fasting glucose	rs11717195	3	123082398	ADCY5	T	C	0.7268	0.801843	0.0279066	6.17021	NP	NP	ADCY5	Yes
Triglycerides 48:0	Fasting glucose	rs10276674	7	14922007	DGKB(dist=40932), AGMO(dist=317936)	T	C	0.8215	0.417969	0.0373884	-7.05882	NP	NP	DGKB (phospholipid mediated)	No
Triglycerides 48:0	Fasting glucose	rs2191349	7	15064309	DGKB(dist=183234), AGMO(dist=175634)	T	G	0.537	-1.33673	0.0521899	8.33333	NP	NP	DGKB?	No
Triglycerides 48:0	Fasting glucose	rs6975024	7	44231886	GCK(dist=2864), YKT6(dist=8692)	T	C	0.8168	-1.15294	0.121213	-12.6531	NP	NP	GCK	Yes
Triglycerides 48:0	Fasting glucose	rs11558471	8	118185733	SLC30A8	A	G	0.6708	0.873832	0.0334041	6.75	NP	NP	SLC30A8	No
Triglycerides 48:0	Fasting glucose	rs10787312	10	113023966	ADRA2A(dist=183304), GPAM(dist=885656)	A	G	0.9064	-1.22989	0.0346173	6.77419	NP	NP	ADRA2A	No
Triglycerides 48:0	Fasting glucose	rs12805422	11	45839889	SLC35C1(dist=5322), CRY2(dist=28780)	A	G	0.5767	-1.8607	0.027813	-6.21622	NP	NP	CRY2, MAPK8IP1	No
Triglycerides 48:0	Fasting glucose	rs2524299	11	61604782	FADS2	A	T	0.8779	0.0827815	0.0261766	5.76923	NP	NP	FADS2 (lipid mediated)	No
Triglycerides 48:0	Fasting glucose	rs7102746	11	92666563	FAT3(dist=36928), MTNR1B(dist=36226)	T	C	0.4644	-1.10701	0.0328408	-6.74419	NP	NP	MTNR1B	No
Triglycerides 48:0	Fasting glucose	rs10830963	11	92708710	MTNR1B	C	G	0.7299	0.5	0.229908	-17.5556	NP	NP	MTNR1B	No
Triglycerides 48:0	Fasting glucose	rs17390909	12	97868654	RMST	C	G	0.9021	0.919771	0.0228987	5.52239	NP	NP	(NA)	No
Triglycerides 48:1	Fasting glucose	rs853770	2	169749841	SPC25(dist=2897), G6PC2(dist=7909)	T	C	0.3055	-0.452899	0.0421445	7.38095	NP	NP	G6PC2	Yes
Triglycerides 48:1	Fasting glucose	rs560887	2	169763148	G6PC2	T	C	0.3096	0.0260223	0.252022	-18.2927	NP	NP	G6PC2	Yes
Triglycerides 48:1	Fasting glucose	rs6709087	2	169799010	ABCB11	A	G	0.7986	-0.114198	0.123354	-12.8	NP	NP	G6PC2	Yes
Triglycerides 48:1	Fasting glucose	rs11717195	3	123082398	ADCY5	T	C	0.7265	0.441315	0.0279066	6.17021	NP	NP	ADCY5	Yes
Triglycerides 48:1	Fasting glucose	rs10276674	7	14922007	DGKB(dist=40932), AGMO(dist=317936)	T	C	0.8217	0.452756	0.0373884	-7.05882	NP	NP	DGKB (phospholipid mediated)	No
Triglycerides 48:1	Fasting glucose	rs2191349	7	15064309	DGKB(dist=183234), AGMO(dist=175634)	T	G	0.5374	-1.31122	0.0521899	8.33333	NP	NP	DGKB?	No
Triglycerides 48:1	Fasting glucose	rs6975024	7	44231886	GCK(dist=2864), YKT6(dist=8692)	T	C	0.817	-0.932806	0.121213	-12.6531	NP	NP	GCK	Yes
Triglycerides 48:1	Fasting glucose	rs11558471	8	118185733	SLC30A8	A	G	0.6705	0.254717	0.0334041	6.75	NP	NP	SLC30A8	No
Triglycerides 48:1	Fasting glucose	rs10787312	10	113023966	ADRA2A(dist=183304), GPAM(dist=885656)	A	G	0.9066	-1.34211	0.0346173	6.77419	NP	NP	ADRA2A	No
Triglycerides 48:1	Fasting glucose	rs12805422	11	45839889	SLC35C1(dist=5322), CRY2(dist=28780)	A	G	0.5767	-2.035	0.027813	-6.21622	NP	NP	CRY2, MAPK8IP1	No
Triglycerides 48:1	Fasting glucose	rs2524299	11	61604782	FADS2	A	T	0.8778	-0.57047	0.0261766	5.76923	NP	NP	FADS2 (lipid mediated)	No
Triglycerides 48:1	Fasting glucose	rs7102746	11	92666563	FAT3(dist=36928), MTNR1B(dist=36226)	T	C	0.4652	-0.11985	0.0328408	-6.74419	NP	NP	MTNR1B	No
Triglycerides 48:1	Fasting glucose	rs10830963	11	92708710	MTNR1B	C	G	0.73	0.871901	0.229908	-17.5556	NP	NP	MTNR1B	No
Triglycerides 48:1	Fasting glucose	rs17390909	12	97868654	RMST	C	G	0.9022	1.23563	0.0228987	5.52239	NP	NP	(NA)	No
Triglycerides 48:2	Fasting glucose	rs853770	2	169749841	SPC25(dist=2897), G6PC2(dist=7909)	T	C	0.3055	-0.432727	0.0421445	7.38095	NP	NP	G6PC2	Yes
Triglycerides 48:2	Fasting glucose	rs560887	2	169763148	G6PC2	T	C	0.3097	0.438662	0.252022	-18.2927	NP	NP	G6PC2	Yes
Triglycerides 48:2	Fasting glucose	rs6709087	2	169799010	ABCB11	A	G	0.7991	-0.39557	0.123354	-12.8	NP	NP	G6PC2	Yes
Triglycerides 48:2	Fasting glucose	rs11717195	3	123082398	ADCY5	T	C	0.7261	0.218605	0.0279066	6.17021	NP	NP	ADCY5	Yes
Triglycerides 48:2	Fasting glucose	rs10276674	7	14922007	DGKB(dist=40932), AGMO(dist=317936)	T	C	0.8219	0.0551181	0.0373884	-7.05882	NP	NP	DGKB (phospholipid mediated)	No
Triglycerides 48:2	Fasting glucose	rs2191349	7	15064309	DGKB(dist=183234), AGMO(dist=175634)	T	G	0.5374	-1.47449	0.0521899	8.33333	NP	NP	DGKB?	No
Triglycerides 48:2	Fasting glucose	rs6975024	7	44231886	GCK(dist=2864), YKT6(dist=8692)	T	C	0.8171	-0.741036	0.121213	-12.6531	NP	NP	GCK	Yes
Triglycerides 48:2	Fasting glucose	rs11558471	8	118185733	SLC30A8	A	G	0.6699	0.649533	0.0334041	6.75	NP	NP	SLC30A8	No
Triglycerides 48:2	Fasting glucose	rs10787312	10	113023966	ADRA2A(dist=183304), GPAM(dist=885656)	A	G	0.9067	-2.07059	0.0346173	6.77419	NP	NP	ADRA2A	No
Triglycerides 48:2	Fasting glucose	rs12805422	11	45839889	SLC35C1(dist=5322), CRY2(dist=28780)	A	G	0.5766	-1.73632	0.027813	-6.21622	NP	NP	CRY2, MAPK8IP1	No
Triglycerides 48:2	Fasting glucose	rs2524299	11	61604782	FADS2	A	T	0.8777	-0.700337	0.0261766	5.76923	NP	NP	FADS2 (lipid mediated)	No
Triglycerides 48:2	Fasting glucose	rs7102746	11	92666563	FAT3(dist=36928), MTNR1B(dist=36226)	T	C	0.4647	-0.490637	0.0328408	-6.74419	NP	NP	MTNR1B	No
Triglycerides 48:2	Fasting glucose	rs10830963	11	92708710	MTNR1B	C	G	0.7299	0.759336	0.229908	-17.5556	NP	NP	MTNR1B	No
Triglycerides 48:2	Fasting glucose	rs17390909	12	97868654	RMST	C	G	0.9024	1.73851	0.0228987	5.52239	NP	NP	(NA)	No
Triglycerides 48:3	Fasting glucose	rs853770	2	169749841	SPC25(dist=2897), G6PC2(dist=7909)	T	C	0.3055	-0.5	0.0421445	7.38095	NP	NP	G6PC2	Yes
Triglycerides 48:3	Fasting glucose	rs560887	2	169763148	G6PC2	T	C	0.3097	-0.0258303	0.252022	-18.2927	NP	NP	G6PC2	Yes
Triglycerides 48:3	Fasting glucose	rs6709087	2	169799010	ABCB11	A	G	0.7988	-0.576803	0.123354	-12.8	NP	NP	G6PC2	Yes
Triglycerides 48:3	Fasting glucose	rs11717195	3	123082398	ADCY5	T	C	0.726	0.350467	0.0279066	6.17021	NP	NP	ADCY5	Yes
Triglycerides 48:3	Fasting glucose	rs10276674	7	14922007	DGKB(dist=40932), AGMO(dist=317936)	T	C	0.8216	-0.0470588	0.0373884	-7.05882	NP	NP	DGKB (phospholipid mediated)	No
Triglycerides 48:3	Fasting glucose	rs2191349	7	15064309	DGKB(dist=183234), AGMO(dist=175634)	T	G	0.5373	-1.31472	0.0521899	8.33333	NP	NP	DGKB?	No
Triglycerides 48:3	Fasting glucose	rs6975024	7	44231886	GCK(dist=2864), YKT6(dist=8692)	T	C	0.8171	-0.798419	0.121213	-12.6531	NP	NP	GCK	Yes
Triglycerides 48:3	Fasting glucose	rs11558471	8	118185733	SLC30A8	A	G	0.67	0.0566038	0.0334041	6.75	NP	NP	SLC30A8	No
Triglycerides 48:3	Fasting glucose	rs10787312	10	113023966	ADRA2A(dist=183304), GPAM(dist=885656)	A	G	0.9065	-1.8739	0.0346173	6.77419	NP	NP	ADRA2A	No
Triglycerides 48:3	Fasting glucose	rs12805422	11	45839889	SLC35C1(dist=5322), CRY2(dist=28780)	A	G	0.5764	-1.82587	0.027813	-6.21622	NP	NP	CRY2, MAPK8IP1	No
Triglycerides 48:3	Fasting glucose	rs2524299	11	61604782	FADS2	A	T	0.8778	0.408027	0.0261766	5.76923	NP	NP	FADS2 (lipid mediated)	No
Triglycerides 48:3	Fasting glucose	rs7102746	11	92666563	FAT3(dist=36928), MTNR1B(dist=36226)	T	C	0.4653	-0.251852	0.0328408	-6.74419	NP	NP	MTNR1B	No
Triglycerides 48:3	Fasting glucose	rs10830963	11	92708710	MTNR1B	C	G	0.7301	0.823045	0.229908	-17.5556	NP	NP	MTNR1B	No
Triglycerides 48:3	Fasting glucose	rs17390909	12	97868654	RMST	C	G	0.9023	1.80115	0.0228987	5.52239	NP	NP	(NA)	No
Triglycerides 50:0	Fasting glucose	rs853770	2	169749841	SPC25(dist=2897), G6PC2(dist=7909)	T	C	0.3057	-0.462121	0.0421445	7.38095	NP	NP	G6PC2	Yes
Triglycerides 50:0	Fasting glucose	rs560887	2	169763148	G6PC2	T	C	0.3098	0.163569	0.252022	-18.2927	NP	NP	G6PC2	Yes
Triglycerides 50:0	Fasting glucose	rs6709087	2	169799010	ABCB11	A	G	0.7999	-0.54902	0.123354	-12.8	NP	NP	G6PC2	Yes
Triglycerides 50:0	Fasting glucose	rs11717195	3	123082398	ADCY5	T	C	0.726	1.1028	0.0279066	6.17021	NP	NP	ADCY5	Yes
Triglycerides 50:0	Fasting glucose	rs10276674	7	14922007	DGKB(dist=40932), AGMO(dist=317936)	T	C	0.8218	-0.16	0.0373884	-7.05882	NP	NP	DGKB (phospholipid mediated)	No
Triglycerides 50:0	Fasting glucose	rs2191349	7	15064309	DGKB(dist=183234), AGMO(dist=175634)	T	G	0.5372	-1.53093	0.0521899	8.33333	NP	NP	DGKB?	No
Triglycerides 50:0	Fasting glucose	rs6975024	7	44231886	GCK(dist=2864), YKT6(dist=8692)	T	C	0.8173	-0.968379	0.121213	-12.6531	NP	NP	GCK	Yes
Triglycerides 50:0	Fasting glucose	rs11558471	8	118185733	SLC30A8	A	G	0.671	0.62201	0.0334041	6.75	NP	NP	SLC30A8	No
Triglycerides 50:0	Fasting glucose	rs10787312	10	113023966	ADRA2A(dist=183304), GPAM(dist=885656)	A	G	0.9068	-0.856716	0.0346173	6.77419	NP	NP	ADRA2A	No
Triglycerides 50:0	Fasting glucose	rs12805422	11	45839889	SLC35C1(dist=5322), CRY2(dist=28780)	A	G	0.5766	-1.20202	0.027813	-6.21622	NP	NP	CRY2, MAPK8IP1	No
Triglycerides 50:0	Fasting glucose	rs2524299	11	61604782	FADS2	A	T	0.8779	-0.277966	0.0261766	5.76923	NP	NP	FADS2 (lipid mediated)	No
Triglycerides 50:0	Fasting glucose	rs7102746	11	92666563	FAT3(dist=36928), MTNR1B(dist=36226)	T	C	0.4652	-0.802239	0.0328408	-6.74419	NP	NP	MTNR1B	No
Triglycerides 50:0	Fasting glucose	rs10830963	11	92708710	MTNR1B	C	G	0.7298	0.308333	0.229908	-17.5556	NP	NP	MTNR1B	No
Triglycerides 50:0	Fasting glucose	rs17390909	12	97868654	RMST	C	G	0.9024	0.828488	0.0228987	5.52239	NP	NP	(NA)	No
Triglycerides 50:1	Fasting glucose	rs853770	2	169749841	SPC25(dist=2897), G6PC2(dist=7909)	T	C	0.3058	-0.418519	0.0421445	7.38095	NP	NP	G6PC2	Yes
Triglycerides 50:1	Fasting glucose	rs560887	2	169763148	G6PC2	T	C	0.3097	-0.298507	0.252022	-18.2927	NP	NP	G6PC2	Yes
Triglycerides 50:1	Fasting glucose	rs6709087	2	169799010	ABCB11	A	G	0.7991	-1.05346	0.123354	-12.8	NP	NP	G6PC2	Yes
Triglycerides 50:1	Fasting glucose	rs11717195	3	123082398	ADCY5	T	C	0.7264	0.200935	0.0279066	6.17021	NP	NP	ADCY5	Yes
Triglycerides 50:1	Fasting glucose	rs10276674	7	14922007	DGKB(dist=40932), AGMO(dist=317936)	T	C	0.8217	0.351562	0.0373884	-7.05882	NP	NP	DGKB (phospholipid mediated)	No
Triglycerides 50:1	Fasting glucose	rs2191349	7	15064309	DGKB(dist=183234), AGMO(dist=175634)	T	G	0.5373	-0.944162	0.0521899	8.33333	NP	NP	DGKB?	No
Triglycerides 50:1	Fasting glucose	rs6975024	7	44231886	GCK(dist=2864), YKT6(dist=8692)	T	C	0.8172	-0.631373	0.121213	-12.6531	NP	NP	GCK	Yes
Triglycerides 50:1	Fasting glucose	rs11558471	8	118185733	SLC30A8	A	G	0.6704	1.2217	0.0334041	6.75	NP	NP	SLC30A8	No
Triglycerides 50:1	Fasting glucose	rs10787312	10	113023966	ADRA2A(dist=183304), GPAM(dist=885656)	A	G	0.9065	-1.08382	0.0346173	6.77419	NP	NP	ADRA2A	No
Triglycerides 50:1	Fasting glucose	rs12805422	11	45839889	SLC35C1(dist=5322), CRY2(dist=28780)	A	G	0.5767	-2.36683	0.027813	-6.21622	NP	NP	CRY2, MAPK8IP1	No
Triglycerides 50:1	Fasting glucose	rs2524299	11	61604782	FADS2	A	T	0.8777	-1.44702	0.0261766	5.76923	NP	NP	FADS2 (lipid mediated)	No
Triglycerides 50:1	Fasting glucose	rs7102746	11	92666563	FAT3(dist=36928), MTNR1B(dist=36226)	T	C	0.4652	-0.802239	0.0328408	-6.74419	NP	NP	MTNR1B	No
Triglycerides 50:1	Fasting glucose	rs10830963	11	92708710	MTNR1B	C	G	0.7301	0.806584	0.229908	-17.5556	NP	NP	MTNR1B	No
Triglycerides 50:1	Fasting glucose	rs17390909	12	97868654	RMST	C	G	0.9023	1.68876	0.0228987	5.52239	NP	NP	(NA)	No
Triglycerides 50:2	Fasting glucose	rs853770	2	169749841	SPC25(dist=2897), G6PC2(dist=7909)	T	C	0.3056	-0.358696	0.0421445	7.38095	NP	NP	G6PC2	Yes
Triglycerides 50:2	Fasting glucose	rs560887	2	169763148	G6PC2	T	C	0.3096	-0.318681	0.252022	-18.2927	NP	NP	G6PC2	Yes
Triglycerides 50:2	Fasting glucose	rs6709087	2	169799010	ABCB11	A	G	0.7989	-1.39441	0.123354	-12.8	NP	NP	G6PC2	Yes
Triglycerides 50:2	Fasting glucose	rs11717195	3	123082398	ADCY5	T	C	0.7263	-0.0465116	0.0279066	6.17021	NP	NP	ADCY5	Yes
Triglycerides 50:2	Fasting glucose	rs10276674	7	14922007	DGKB(dist=40932), AGMO(dist=317936)	T	C	0.8217	0.396887	0.0373884	-7.05882	NP	NP	DGKB (phospholipid mediated)	No
Triglycerides 50:2	Fasting glucose	rs2191349	7	15064309	DGKB(dist=183234), AGMO(dist=175634)	T	G	0.5373	-1	0.0521899	8.33333	NP	NP	DGKB?	No
Triglycerides 50:2	Fasting glucose	rs6975024	7	44231886	GCK(dist=2864), YKT6(dist=8692)	T	C	0.8172	-0.0705882	0.121213	-12.6531	NP	NP	GCK	Yes
Triglycerides 50:2	Fasting glucose	rs11558471	8	118185733	SLC30A8	A	G	0.6696	1.125	0.0334041	6.75	NP	NP	SLC30A8	No
Triglycerides 50:2	Fasting glucose	rs10787312	10	113023966	ADRA2A(dist=183304), GPAM(dist=885656)	A	G	0.9065	-1.55908	0.0346173	6.77419	NP	NP	ADRA2A	No
Triglycerides 50:2	Fasting glucose	rs2524299	11	61604782	FADS2	A	T	0.8777	-1.98033	0.0261766	5.76923	NP	NP	FADS2 (lipid mediated)	No
Triglycerides 50:2	Fasting glucose	rs7102746	11	92666563	FAT3(dist=36928), MTNR1B(dist=36226)	T	C	0.4652	-0.57037	0.0328408	-6.74419	NP	NP	MTNR1B	No
Triglycerides 50:2	Fasting glucose	rs10830963	11	92708710	MTNR1B	C	G	0.7301	0.934426	0.229908	-17.5556	NP	NP	MTNR1B	No
Triglycerides 50:2	Fasting glucose	rs17390909	12	97868654	RMST	C	G	0.9023	2.18625	0.0228987	5.52239	NP	NP	(NA)	No
Triglycerides 50:3	Fasting glucose	rs853770	2	169749841	SPC25(dist=2897), G6PC2(dist=7909)	T	C	0.3053	-0.354839	0.0421445	7.38095	NP	NP	G6PC2	Yes
Triglycerides 50:3	Fasting glucose	rs560887	2	169763148	G6PC2	T	C	0.3096	-0.014652	0.252022	-18.2927	NP	NP	G6PC2	Yes
Triglycerides 50:3	Fasting glucose	rs6709087	2	169799010	ABCB11	A	G	0.7989	-1.73438	0.123354	-12.8	NP	NP	G6PC2	Yes
Triglycerides 50:3	Fasting glucose	rs11717195	3	123082398	ADCY5	T	C	0.7259	0.0737327	0.0279066	6.17021	NP	NP	ADCY5	Yes
Triglycerides 50:3	Fasting glucose	rs10276674	7	14922007	DGKB(dist=40932), AGMO(dist=317936)	T	C	0.8217	0.0972763	0.0373884	-7.05882	NP	NP	DGKB (phospholipid mediated)	No
Triglycerides 50:3	Fasting glucose	rs2191349	7	15064309	DGKB(dist=183234), AGMO(dist=175634)	T	G	0.5373	-0.775	0.0521899	8.33333	NP	NP	DGKB?	No
Triglycerides 50:3	Fasting glucose	rs6975024	7	44231886	GCK(dist=2864), YKT6(dist=8692)	T	C	0.8172	-0.03125	0.121213	-12.6531	NP	NP	GCK	Yes
Triglycerides 50:3	Fasting glucose	rs11558471	8	118185733	SLC30A8	A	G	0.6693	1.2037	0.0334041	6.75	NP	NP	SLC30A8	No
Triglycerides 50:3	Fasting glucose	rs10787312	10	113023966	ADRA2A(dist=183304), GPAM(dist=885656)	A	G	0.9067	-1.69942	0.0346173	6.77419	NP	NP	ADRA2A	No
Triglycerides 50:3	Fasting glucose	rs12805422	11	45839889	SLC35C1(dist=5322), CRY2(dist=28780)	A	G	0.5766	-2.07463	0.027813	-6.21622	NP	NP	CRY2, MAPK8IP1	No
Triglycerides 50:3	Fasting glucose	rs2524299	11	61604782	FADS2	A	T	0.8777	-1.23102	0.0261766	5.76923	NP	NP	FADS2 (lipid mediated)	No
Triglycerides 50:3	Fasting glucose	rs7102746	11	92666563	FAT3(dist=36928), MTNR1B(dist=36226)	T	C	0.4651	-0.553506	0.0328408	-6.74419	NP	NP	MTNR1B	No
Triglycerides 50:3	Fasting glucose	rs10830963	11	92708710	MTNR1B	C	G	0.7304	0.779592	0.229908	-17.5556	NP	NP	MTNR1B	No
Triglycerides 50:3	Fasting glucose	rs17390909	12	97868654	RMST	C	G	0.9025	2.59322	0.0228987	5.52239	NP	NP	(NA)	No
Triglycerides 50:4	Fasting glucose	rs853770	2	169749841	SPC25(dist=2897), G6PC2(dist=7909)	T	C	0.3055	-0.57971	0.0421445	7.38095	NP	NP	G6PC2	Yes
Triglycerides 50:4	Fasting glucose	rs560887	2	169763148	G6PC2	T	C	0.3096	0.274074	0.252022	-18.2927	NP	NP	G6PC2	Yes
Triglycerides 50:4	Fasting glucose	rs6709087	2	169799010	ABCB11	A	G	0.799	-1.9653	0.123354	-12.8	NP	NP	G6PC2	Yes
Triglycerides 50:4	Fasting glucose	rs11717195	3	123082398	ADCY5	T	C	0.7256	0.00921659	0.0279066	6.17021	NP	NP	ADCY5	Yes
Triglycerides 50:4	Fasting glucose	rs10276674	7	14922007	DGKB(dist=40932), AGMO(dist=317936)	T	C	0.8217	0.162055	0.0373884	-7.05882	NP	NP	DGKB (phospholipid mediated)	No
Triglycerides 50:4	Fasting glucose	rs2191349	7	15064309	DGKB(dist=183234), AGMO(dist=175634)	T	G	0.5373	-0.824121	0.0521899	8.33333	NP	NP	DGKB?	No
Triglycerides 50:4	Fasting glucose	rs6975024	7	44231886	GCK(dist=2864), YKT6(dist=8692)	T	C	0.8172	0.156863	0.121213	-12.6531	NP	NP	GCK	Yes
Triglycerides 50:4	Fasting glucose	rs11558471	8	118185733	SLC30A8	A	G	0.6694	0.413953	0.0334041	6.75	NP	NP	SLC30A8	No
Triglycerides 50:4	Fasting glucose	rs10787312	10	113023966	ADRA2A(dist=183304), GPAM(dist=885656)	A	G	0.9066	-1.55294	0.0346173	6.77419	NP	NP	ADRA2A	No
Triglycerides 50:4	Fasting glucose	rs12805422	11	45839889	SLC35C1(dist=5322), CRY2(dist=28780)	A	G	0.5766	-1.89	0.027813	-6.21622	NP	NP	CRY2, MAPK8IP1	No
Triglycerides 50:4	Fasting glucose	rs2524299	11	61604782	FADS2	A	T	0.8778	0.458194	0.0261766	5.76923	NP	NP	FADS2 (lipid mediated)	No
Triglycerides 50:4	Fasting glucose	rs7102746	11	92666563	FAT3(dist=36928), MTNR1B(dist=36226)	T	C	0.4651	-0.680297	0.0328408	-6.74419	NP	NP	MTNR1B	No
Triglycerides 50:4	Fasting glucose	rs10830963	11	92708710	MTNR1B	C	G	0.7303	0.647541	0.229908	-17.5556	NP	NP	MTNR1B	No
Triglycerides 50:4	Fasting glucose	rs17390909	12	97868654	RMST	C	G	0.9023	2.88952	0.0228987	5.52239	NP	NP	(NA)	No
Triglycerides 51:1	Fasting glucose	rs853770	2	169749841	SPC25(dist=2897), G6PC2(dist=7909)	T	C	0.3057	-0.763838	0.0421445	7.38095	NP	NP	G6PC2	Yes
Triglycerides 51:1	Fasting glucose	rs560887	2	169763148	G6PC2	T	C	0.3098	0.172794	0.252022	-18.2927	NP	NP	G6PC2	Yes
Triglycerides 51:1	Fasting glucose	rs6709087	2	169799010	ABCB11	A	G	0.7991	-0.805732	0.123354	-12.8	NP	NP	G6PC2	Yes
Triglycerides 51:1	Fasting glucose	rs11717195	3	123082398	ADCY5	T	C	0.7262	0.469484	0.0279066	6.17021	NP	NP	ADCY5	Yes
Triglycerides 51:1	Fasting glucose	rs10276674	7	14922007	DGKB(dist=40932), AGMO(dist=317936)	T	C	0.8216	1.01976	0.0373884	-7.05882	NP	NP	DGKB (phospholipid mediated)	No
Triglycerides 51:1	Fasting glucose	rs2191349	7	15064309	DGKB(dist=183234), AGMO(dist=175634)	T	G	0.5372	-0.857143	0.0521899	8.33333	NP	NP	DGKB?	No
Triglycerides 51:1	Fasting glucose	rs6975024	7	44231886	GCK(dist=2864), YKT6(dist=8692)	T	C	0.8172	-0.496063	0.121213	-12.6531	NP	NP	GCK	Yes
Triglycerides 51:1	Fasting glucose	rs11558471	8	118185733	SLC30A8	A	G	0.67	0.566038	0.0334041	6.75	NP	NP	SLC30A8	No
Triglycerides 51:1	Fasting glucose	rs10787312	10	113023966	ADRA2A(dist=183304), GPAM(dist=885656)	A	G	0.9064	-1.59429	0.0346173	6.77419	NP	NP	ADRA2A	No
Triglycerides 51:1	Fasting glucose	rs12805422	11	45839889	SLC35C1(dist=5322), CRY2(dist=28780)	A	G	0.5767	-2.01005	0.027813	-6.21622	NP	NP	CRY2, MAPK8IP1	No
Triglycerides 51:1	Fasting glucose	rs2524299	11	61604782	FADS2	A	T	0.8777	0.577181	0.0261766	5.76923	NP	NP	FADS2 (lipid mediated)	No
Triglycerides 51:1	Fasting glucose	rs7102746	11	92666563	FAT3(dist=36928), MTNR1B(dist=36226)	T	C	0.4655	0.0185185	0.0328408	-6.74419	NP	NP	MTNR1B	No
Triglycerides 51:1	Fasting glucose	rs10830963	11	92708710	MTNR1B	C	G	0.73	1.04167	0.229908	-17.5556	NP	NP	MTNR1B	No
Triglycerides 51:1	Fasting glucose	rs17390909	12	97868654	RMST	C	G	0.9023	1.44571	0.0228987	5.52239	NP	NP	(NA)	No
Triglycerides 52:1	Fasting glucose	rs853770	2	169749841	SPC25(dist=2897), G6PC2(dist=7909)	T	C	0.306	-1	0.0421445	7.38095	NP	NP	G6PC2	Yes
Triglycerides 52:1	Fasting glucose	rs560887	2	169763148	G6PC2	T	C	0.3096	0.187266	0.252022	-18.2927	NP	NP	G6PC2	Yes
Triglycerides 52:1	Fasting glucose	rs6709087	2	169799010	ABCB11	A	G	0.7998	-0.750809	0.123354	-12.8	NP	NP	G6PC2	Yes
Triglycerides 52:1	Fasting glucose	rs11717195	3	123082398	ADCY5	T	C	0.7262	0.481308	0.0279066	6.17021	NP	NP	ADCY5	Yes
Triglycerides 52:1	Fasting glucose	rs10276674	7	14922007	DGKB(dist=40932), AGMO(dist=317936)	T	C	0.8218	-0.0119522	0.0373884	-7.05882	NP	NP	DGKB (phospholipid mediated)	No
Triglycerides 52:1	Fasting glucose	rs2191349	7	15064309	DGKB(dist=183234), AGMO(dist=175634)	T	G	0.5373	-1.46667	0.0521899	8.33333	NP	NP	DGKB?	No
Triglycerides 52:1	Fasting glucose	rs6975024	7	44231886	GCK(dist=2864), YKT6(dist=8692)	T	C	0.8172	-0.211765	0.121213	-12.6531	NP	NP	GCK	Yes
Triglycerides 52:1	Fasting glucose	rs11558471	8	118185733	SLC30A8	A	G	0.6704	1.32227	0.0334041	6.75	NP	NP	SLC30A8	No
Triglycerides 52:1	Fasting glucose	rs10787312	10	113023966	ADRA2A(dist=183304), GPAM(dist=885656)	A	G	0.9066	-1.09302	0.0346173	6.77419	NP	NP	ADRA2A	No
Triglycerides 52:1	Fasting glucose	rs12805422	11	45839889	SLC35C1(dist=5322), CRY2(dist=28780)	A	G	0.5767	-2.23858	0.027813	-6.21622	NP	NP	CRY2, MAPK8IP1	No
Triglycerides 52:1	Fasting glucose	rs2524299	11	61604782	FADS2	A	T	0.8779	-0.935811	0.0261766	5.76923	NP	NP	FADS2 (lipid mediated)	No
Triglycerides 52:1	Fasting glucose	rs7102746	11	92666563	FAT3(dist=36928), MTNR1B(dist=36226)	T	C	0.4652	-0.524164	0.0328408	-6.74419	NP	NP	MTNR1B	No
Triglycerides 52:1	Fasting glucose	rs10830963	11	92708710	MTNR1B	C	G	0.7297	0.651452	0.229908	-17.5556	NP	NP	MTNR1B	No
Triglycerides 52:1	Fasting glucose	rs17390909	12	97868654	RMST	C	G	0.9025	0.668605	0.0228987	5.52239	NP	NP	(NA)	No
Triglycerides 53:1	Fasting glucose	rs853770	2	169749841	SPC25(dist=2897), G6PC2(dist=7909)	T	C	0.3058	0.0181818	0.0421445	7.38095	NP	NP	G6PC2	Yes
Triglycerides 53:1	Fasting glucose	rs560887	2	169763148	G6PC2	T	C	0.3102	0.276753	0.252022	-18.2927	NP	NP	G6PC2	Yes
Triglycerides 53:1	Fasting glucose	rs6709087	2	169799010	ABCB11	A	G	0.7993	-0.717868	0.123354	-12.8	NP	NP	G6PC2	Yes
Triglycerides 53:1	Fasting glucose	rs11717195	3	123082398	ADCY5	T	C	0.7257	0.408451	0.0279066	6.17021	NP	NP	ADCY5	Yes
Triglycerides 53:1	Fasting glucose	rs10276674	7	14922007	DGKB(dist=40932), AGMO(dist=317936)	T	C	0.8215	1.00395	0.0373884	-7.05882	NP	NP	DGKB (phospholipid mediated)	No
Triglycerides 53:1	Fasting glucose	rs2191349	7	15064309	DGKB(dist=183234), AGMO(dist=175634)	T	G	0.5376	-0.204082	0.0521899	8.33333	NP	NP	DGKB?	No
Triglycerides 53:1	Fasting glucose	rs6975024	7	44231886	GCK(dist=2864), YKT6(dist=8692)	T	C	0.8176	-1.30588	0.121213	-12.6531	NP	NP	GCK	Yes
Triglycerides 53:1	Fasting glucose	rs11558471	8	118185733	SLC30A8	A	G	0.6693	0.309859	0.0334041	6.75	NP	NP	SLC30A8	No
Triglycerides 53:1	Fasting glucose	rs10787312	10	113023966	ADRA2A(dist=183304), GPAM(dist=885656)	A	G	0.9065	-1.47293	0.0346173	6.77419	NP	NP	ADRA2A	No
Triglycerides 53:1	Fasting glucose	rs12805422	11	45839889	SLC35C1(dist=5322), CRY2(dist=28780)	A	G	0.5759	-1.72637	0.027813	-6.21622	NP	NP	CRY2, MAPK8IP1	No
Triglycerides 53:1	Fasting glucose	rs2524299	11	61604782	FADS2	A	T	0.8777	-1.66	0.0261766	5.76923	NP	NP	FADS2 (lipid mediated)	No
Triglycerides 53:1	Fasting glucose	rs7102746	11	92666563	FAT3(dist=36928), MTNR1B(dist=36226)	T	C	0.466	-0.916364	0.0328408	-6.74419	NP	NP	MTNR1B	No
Triglycerides 53:1	Fasting glucose	rs10830963	11	92708710	MTNR1B	C	G	0.7302	1.56967	0.229908	-17.5556	NP	NP	MTNR1B	No
Triglycerides 53:1	Fasting glucose	rs17390909	12	97868654	RMST	C	G	0.9026	1.13598	0.0228987	5.52239	NP	NP	(NA)	No
Triglycerides 54:1	Fasting glucose	rs853770	2	169749841	SPC25(dist=2897), G6PC2(dist=7909)	T	C	0.3057	-1.46388	0.0421445	7.38095	NP	NP	G6PC2	Yes
Triglycerides 54:1	Fasting glucose	rs560887	2	169763148	G6PC2	T	C	0.3098	-0.25	0.252022	-18.2927	NP	NP	G6PC2	Yes
Triglycerides 54:1	Fasting glucose	rs6709087	2	169799010	ABCB11	A	G	0.8001	-0.365132	0.123354	-12.8	NP	NP	G6PC2	Yes
Triglycerides 54:1	Fasting glucose	rs11717195	3	123082398	ADCY5	T	C	0.7262	1.39815	0.0279066	6.17021	NP	NP	ADCY5	Yes
Triglycerides 54:1	Fasting glucose	rs10276674	7	14922007	DGKB(dist=40932), AGMO(dist=317936)	T	C	0.8217	0.136719	0.0373884	-7.05882	NP	NP	DGKB (phospholipid mediated)	No
Triglycerides 54:1	Fasting glucose	rs2191349	7	15064309	DGKB(dist=183234), AGMO(dist=175634)	T	G	0.5373	-0.994872	0.0521899	8.33333	NP	NP	DGKB?	No
Triglycerides 54:1	Fasting glucose	rs6975024	7	44231886	GCK(dist=2864), YKT6(dist=8692)	T	C	0.8171	-0.628906	0.121213	-12.6531	NP	NP	GCK	Yes
Triglycerides 54:1	Fasting glucose	rs11558471	8	118185733	SLC30A8	A	G	0.6708	0.990521	0.0334041	6.75	NP	NP	SLC30A8	No
Triglycerides 54:1	Fasting glucose	rs10787312	10	113023966	ADRA2A(dist=183304), GPAM(dist=885656)	A	G	0.9063	-1.12286	0.0346173	6.77419	NP	NP	ADRA2A	No
Triglycerides 54:1	Fasting glucose	rs12805422	11	45839889	SLC35C1(dist=5322), CRY2(dist=28780)	A	G	0.5768	-2.70854	0.027813	-6.21622	NP	NP	CRY2, MAPK8IP1	No
Triglycerides 54:1	Fasting glucose	rs2524299	11	61604782	FADS2	A	T	0.8778	-0.843537	0.0261766	5.76923	NP	NP	FADS2 (lipid mediated)	No
Triglycerides 54:1	Fasting glucose	rs7102746	11	92666563	FAT3(dist=36928), MTNR1B(dist=36226)	T	C	0.4649	0.382022	0.0328408	-6.74419	NP	NP	MTNR1B	No
Triglycerides 54:1	Fasting glucose	rs10830963	11	92708710	MTNR1B	C	G	0.7301	0.35124	0.229908	-17.5556	NP	NP	MTNR1B	No
Triglycerides 54:1	Fasting glucose	rs17390909	12	97868654	RMST	C	G	0.9026	0.0116618	0.0228987	5.52239	NP	NP	(NA)	No
Triglycerides 54:7	Fasting glucose	rs853770	2	169749841	SPC25(dist=2897), G6PC2(dist=7909)	T	C	0.3055	-0.557554	0.0421445	7.38095	NP	NP	G6PC2	Yes
Triglycerides 54:7	Fasting glucose	rs560887	2	169763148	G6PC2	T	C	0.3096	0.441606	0.252022	-18.2927	NP	NP	G6PC2	Yes
Triglycerides 54:7	Fasting glucose	rs6709087	2	169799010	ABCB11	A	G	0.799	-1.40062	0.123354	-12.8	NP	NP	G6PC2	Yes
Triglycerides 54:7	Fasting glucose	rs11717195	3	123082398	ADCY5	T	C	0.7255	-0.47907	0.0279066	6.17021	NP	NP	ADCY5	Yes
Triglycerides 54:7	Fasting glucose	rs10276674	7	14922007	DGKB(dist=40932), AGMO(dist=317936)	T	C	0.8216	0.027451	0.0373884	-7.05882	NP	NP	DGKB (phospholipid mediated)	No
Triglycerides 54:7	Fasting glucose	rs2191349	7	15064309	DGKB(dist=183234), AGMO(dist=175634)	T	G	0.5373	-0.287879	0.0521899	8.33333	NP	NP	DGKB?	No
Triglycerides 54:7	Fasting glucose	rs6975024	7	44231886	GCK(dist=2864), YKT6(dist=8692)	T	C	0.8176	-0.316406	0.121213	-12.6531	NP	NP	GCK	Yes
Triglycerides 54:7	Fasting glucose	rs11558471	8	118185733	SLC30A8	A	G	0.6691	0.621495	0.0334041	6.75	NP	NP	SLC30A8	No
Triglycerides 54:7	Fasting glucose	rs10787312	10	113023966	ADRA2A(dist=183304), GPAM(dist=885656)	A	G	0.9066	-1.57101	0.0346173	6.77419	NP	NP	ADRA2A	No
Triglycerides 54:7	Fasting glucose	rs12805422	11	45839889	SLC35C1(dist=5322), CRY2(dist=28780)	A	G	0.5765	-1.64824	0.027813	-6.21622	NP	NP	CRY2, MAPK8IP1	No
Triglycerides 54:7	Fasting glucose	rs7102746	11	92666563	FAT3(dist=36928), MTNR1B(dist=36226)	T	C	0.4651	-1.09747	0.0328408	-6.74419	NP	NP	MTNR1B	No
Triglycerides 54:7	Fasting glucose	rs10830963	11	92708710	MTNR1B	C	G	0.7308	-0.117409	0.229908	-17.5556	NP	NP	MTNR1B	No
Triglycerides 54:7	Fasting glucose	rs17390909	12	97868654	RMST	C	G	0.9024	2.19318	0.0228987	5.52239	NP	NP	(NA)	No
Plasma-triglycerides	Fasting glucose	rs853770	2	169749841	SPC25(dist=2897), G6PC2(dist=7909)	C	T	0.787446	0.178884	0.0421445	-7.38095	NP	NP	G6PC2	Yes
Plasma-triglycerides	Fasting glucose	rs560887	2	169763148	G6PC2	C	T	0.699739	-2.46701	0.252022	18.2927	NP	NP	G6PC2	Yes
Plasma-triglycerides	Fasting glucose	rs6709087	2	169799010	ABCB11	G	A	0.155952	-1.3205	0.123354	12.8	NP	NP	G6PC2	Yes
Plasma-triglycerides	Fasting glucose	rs11717195	3	123082398	ADCY5	C	T	0.183386	-0.883807	0.0279066	-6.17021	NP	NP	ADCY5	Yes
Plasma-triglycerides	Fasting glucose	rs10276674	7	14922007	DGKB(dist=40932), AGMO(dist=317936)	C	T	0.211279	1.15764	0.0373884	7.05882	NP	NP	DGKB (phospholipid mediated)	No
Plasma-triglycerides	Fasting glucose	rs2191349	7	15064309	DGKB(dist=183234), AGMO(dist=175634)	T	G	0.481675	-0.694247	0.0521899	8.33333	NP	NP	DGKB?	No
Plasma-triglycerides	Fasting glucose	rs6975024	7	44231886	GCK(dist=2864), YKT6(dist=8692)	C	T	0.120554	-0.0606722	0.121213	12.6531	NP	NP	GCK	Yes
Plasma-triglycerides	Fasting glucose	rs11558471	8	118185733	SLC30A8	G	A	0.363081	-0.598173	0.0334041	-6.75	NP	NP	SLC30A8	No
Plasma-triglycerides	Fasting glucose	rs10787312	10	113023966	ADRA2A(dist=183304), GPAM(dist=885656)	A	G	0.898209	0.534268	0.0346173	6.77419	NP	NP	ADRA2A	No
Plasma-triglycerides	Fasting glucose	rs12805422	11	45839889	SLC35C1(dist=5322), CRY2(dist=28780)	A	G	0.505521	0.679609	0.027813	-6.21622	NP	NP	CRY2, MAPK8IP1	No
Plasma-triglycerides	Fasting glucose	rs2524299	11	61604782	FADS2	T	A	0.239072	3.00734	0.0261766	-5.76923	NP	NP	FADS2 (lipid mediated)	No
Plasma-triglycerides	Fasting glucose	rs7102746	11	92666563	FAT3(dist=36928), MTNR1B(dist=36226)	C	T	0.562817	1.68166	0.0328408	6.74419	NP	NP	MTNR1B	No
Plasma-triglycerides	Fasting glucose	rs10830963	11	92708710	MTNR1B	G	C	0.32866	-1.07084	0.229908	17.5556	NP	NP	MTNR1B	No
Plasma-triglycerides	Fasting glucose	rs17390909	12	97868654	RMST	G	C	0.103736	-1.03236	0.0228987	-5.52239	NP	NP	(NA)	No
XXL-VLDL-phospholipids	Fasting glucose	rs853770	2	169749841	SPC25(dist=2897), G6PC2(dist=7909)	C	T	0.787458	0.253545	0.0421445	-7.38095	NP	NP	G6PC2	Yes
XXL-VLDL-phospholipids	Fasting glucose	rs560887	2	169763148	G6PC2	C	T	0.699737	-1.71391	0.252022	18.2927	NP	NP	G6PC2	Yes
XXL-VLDL-phospholipids	Fasting glucose	rs6709087	2	169799010	ABCB11	G	A	0.155957	-1.2508	0.123354	12.8	NP	NP	G6PC2	Yes
XXL-VLDL-phospholipids	Fasting glucose	rs11717195	3	123082398	ADCY5	C	T	0.183375	-0.00806641	0.0279066	-6.17021	NP	NP	ADCY5	Yes
XXL-VLDL-phospholipids	Fasting glucose	rs10276674	7	14922007	DGKB(dist=40932), AGMO(dist=317936)	C	T	0.211281	0.861306	0.0373884	7.05882	NP	NP	DGKB (phospholipid mediated)	No
XXL-VLDL-phospholipids	Fasting glucose	rs2191349	7	15064309	DGKB(dist=183234), AGMO(dist=175634)	T	G	0.481672	-0.791557	0.0521899	8.33333	NP	NP	DGKB?	No
XXL-VLDL-phospholipids	Fasting glucose	rs6975024	7	44231886	GCK(dist=2864), YKT6(dist=8692)	C	T	0.120549	2.12227	0.121213	12.6531	NP	NP	GCK	Yes
XXL-VLDL-phospholipids	Fasting glucose	rs11558471	8	118185733	SLC30A8	G	A	0.363082	-0.750218	0.0334041	-6.75	NP	NP	SLC30A8	No
XXL-VLDL-phospholipids	Fasting glucose	rs10787312	10	113023966	ADRA2A(dist=183304), GPAM(dist=885656)	A	G	0.898212	-0.132924	0.0346173	6.77419	NP	NP	ADRA2A	No
XXL-VLDL-phospholipids	Fasting glucose	rs12805422	11	45839889	SLC35C1(dist=5322), CRY2(dist=28780)	A	G	0.505515	1.99481	0.027813	-6.21622	NP	NP	CRY2, MAPK8IP1	No
XXL-VLDL-phospholipids	Fasting glucose	rs7102746	11	92666563	FAT3(dist=36928), MTNR1B(dist=36226)	C	T	0.562792	0.637098	0.0328408	6.74419	NP	NP	MTNR1B	No
XXL-VLDL-phospholipids	Fasting glucose	rs10830963	11	92708710	MTNR1B	G	C	0.328675	-1.50997	0.229908	17.5556	NP	NP	MTNR1B	No
XXL-VLDL-phospholipids	Fasting glucose	rs17390909	12	97868654	RMST	G	C	0.103741	-1.21188	0.0228987	-5.52239	NP	NP	(NA)	No
XXL-VLDL-triglycerides	Fasting glucose	rs853770	2	169749841	SPC25(dist=2897), G6PC2(dist=7909)	C	T	0.787466	-0.307411	0.0421445	-7.38095	NP	NP	G6PC2	Yes
XXL-VLDL-triglycerides	Fasting glucose	rs560887	2	169763148	G6PC2	C	T	0.699735	-2.02569	0.252022	18.2927	NP	NP	G6PC2	Yes
XXL-VLDL-triglycerides	Fasting glucose	rs6709087	2	169799010	ABCB11	G	A	0.155961	-0.565432	0.123354	12.8	NP	NP	G6PC2	Yes
XXL-VLDL-triglycerides	Fasting glucose	rs11717195	3	123082398	ADCY5	C	T	0.183368	-0.784694	0.0279066	-6.17021	NP	NP	ADCY5	Yes
XXL-VLDL-triglycerides	Fasting glucose	rs10276674	7	14922007	DGKB(dist=40932), AGMO(dist=317936)	C	T	0.211283	1.22467	0.0373884	7.05882	NP	NP	DGKB (phospholipid mediated)	No
XXL-VLDL-triglycerides	Fasting glucose	rs2191349	7	15064309	DGKB(dist=183234), AGMO(dist=175634)	T	G	0.48167	-0.256431	0.0521899	8.33333	NP	NP	DGKB?	No
XXL-VLDL-triglycerides	Fasting glucose	rs6975024	7	44231886	GCK(dist=2864), YKT6(dist=8692)	C	T	0.120545	1.20949	0.121213	12.6531	NP	NP	GCK	Yes
XXL-VLDL-triglycerides	Fasting glucose	rs11558471	8	118185733	SLC30A8	G	A	0.363082	-0.937008	0.0334041	-6.75	NP	NP	SLC30A8	No
XXL-VLDL-triglycerides	Fasting glucose	rs10787312	10	113023966	ADRA2A(dist=183304), GPAM(dist=885656)	A	G	0.898214	0.129927	0.0346173	6.77419	NP	NP	ADRA2A	No
XXL-VLDL-triglycerides	Fasting glucose	rs12805422	11	45839889	SLC35C1(dist=5322), CRY2(dist=28780)	A	G	0.505511	1.50495	0.027813	-6.21622	NP	NP	CRY2, MAPK8IP1	No
XXL-VLDL-triglycerides	Fasting glucose	rs7102746	11	92666563	FAT3(dist=36928), MTNR1B(dist=36226)	C	T	0.562776	1.20714	0.0328408	6.74419	NP	NP	MTNR1B	No
XXL-VLDL-triglycerides	Fasting glucose	rs10830963	11	92708710	MTNR1B	G	C	0.328684	-1.09576	0.229908	17.5556	NP	NP	MTNR1B	No
XXL-VLDL-triglycerides	Fasting glucose	rs17390909	12	97868654	RMST	G	C	0.103745	-1.55118	0.0228987	-5.52239	NP	NP	(NA)	No
M-VLDL-triglycerides	Fasting glucose	rs853770	2	169749841	SPC25(dist=2897), G6PC2(dist=7909)	C	T	0.787126	0.208065	0.0421445	-7.38095	NP	NP	G6PC2	Yes
M-VLDL-triglycerides	Fasting glucose	rs560887	2	169763148	G6PC2	C	T	0.699793	-1.2745	0.252022	18.2927	NP	NP	G6PC2	Yes
M-VLDL-triglycerides	Fasting glucose	rs6709087	2	169799010	ABCB11	G	A	0.156023	-1.18867	0.123354	12.8	NP	NP	G6PC2	Yes
M-VLDL-triglycerides	Fasting glucose	rs11717195	3	123082398	ADCY5	C	T	0.183331	0.446288	0.0279066	-6.17021	NP	NP	ADCY5	Yes
M-VLDL-triglycerides	Fasting glucose	rs10276674	7	14922007	DGKB(dist=40932), AGMO(dist=317936)	C	T	0.211353	0.926428	0.0373884	7.05882	NP	NP	DGKB (phospholipid mediated)	No
M-VLDL-triglycerides	Fasting glucose	rs2191349	7	15064309	DGKB(dist=183234), AGMO(dist=175634)	T	G	0.481816	-1.02715	0.0521899	8.33333	NP	NP	DGKB?	No
M-VLDL-triglycerides	Fasting glucose	rs6975024	7	44231886	GCK(dist=2864), YKT6(dist=8692)	C	T	0.120911	-0.821476	0.121213	12.6531	NP	NP	GCK	Yes
M-VLDL-triglycerides	Fasting glucose	rs11558471	8	118185733	SLC30A8	G	A	0.363222	-0.506806	0.0334041	-6.75	NP	NP	SLC30A8	No
M-VLDL-triglycerides	Fasting glucose	rs10787312	10	113023966	ADRA2A(dist=183304), GPAM(dist=885656)	A	G	0.898369	0.000547512	0.0346173	6.77419	NP	NP	ADRA2A	No
M-VLDL-triglycerides	Fasting glucose	rs12805422	11	45839889	SLC35C1(dist=5322), CRY2(dist=28780)	A	G	0.505532	1.83063	0.027813	-6.21622	NP	NP	CRY2, MAPK8IP1	No
M-VLDL-triglycerides	Fasting glucose	rs7102746	11	92666563	FAT3(dist=36928), MTNR1B(dist=36226)	C	T	0.56303	1.97642	0.0328408	6.74419	NP	NP	MTNR1B	No
M-VLDL-triglycerides	Fasting glucose	rs10830963	11	92708710	MTNR1B	G	C	0.328315	-1.43658	0.229908	17.5556	NP	NP	MTNR1B	No
M-VLDL-triglycerides	Fasting glucose	rs17390909	12	97868654	RMST	G	C	0.103788	-0.73067	0.0228987	-5.52239	NP	NP	(NA)	No
S-VLDL-triglycerides	Fasting glucose	rs853770	2	169749841	SPC25(dist=2897), G6PC2(dist=7909)	C	T	0.787394	-0.0736415	0.0421445	-7.38095	NP	NP	G6PC2	Yes
S-VLDL-triglycerides	Fasting glucose	rs560887	2	169763148	G6PC2	C	T	0.699747	-2.54648	0.252022	18.2927	NP	NP	G6PC2	Yes
S-VLDL-triglycerides	Fasting glucose	rs6709087	2	169799010	ABCB11	G	A	0.155931	-1.4609	0.123354	12.8	NP	NP	G6PC2	Yes
S-VLDL-triglycerides	Fasting glucose	rs11717195	3	123082398	ADCY5	C	T	0.183431	-0.577267	0.0279066	-6.17021	NP	NP	ADCY5	Yes
S-VLDL-triglycerides	Fasting glucose	rs10276674	7	14922007	DGKB(dist=40932), AGMO(dist=317936)	C	T	0.211267	1.29997	0.0373884	7.05882	NP	NP	DGKB (phospholipid mediated)	No
S-VLDL-triglycerides	Fasting glucose	rs2191349	7	15064309	DGKB(dist=183234), AGMO(dist=175634)	T	G	0.481691	-0.498831	0.0521899	8.33333	NP	NP	DGKB?	No
S-VLDL-triglycerides	Fasting glucose	rs6975024	7	44231886	GCK(dist=2864), YKT6(dist=8692)	C	T	0.120619	-0.0559191	0.121213	12.6531	NP	NP	GCK	Yes
S-VLDL-triglycerides	Fasting glucose	rs11558471	8	118185733	SLC30A8	G	A	0.363078	-0.273673	0.0334041	-6.75	NP	NP	SLC30A8	No
S-VLDL-triglycerides	Fasting glucose	rs10787312	10	113023966	ADRA2A(dist=183304), GPAM(dist=885656)	A	G	0.898193	0.903995	0.0346173	6.77419	NP	NP	ADRA2A	No
S-VLDL-triglycerides	Fasting glucose	rs12805422	11	45839889	SLC35C1(dist=5322), CRY2(dist=28780)	A	G	0.505547	0.817329	0.027813	-6.21622	NP	NP	CRY2, MAPK8IP1	No
S-VLDL-triglycerides	Fasting glucose	rs7102746	11	92666563	FAT3(dist=36928), MTNR1B(dist=36226)	C	T	0.562925	1.90568	0.0328408	6.74419	NP	NP	MTNR1B	No
S-VLDL-triglycerides	Fasting glucose	rs10830963	11	92708710	MTNR1B	G	C	0.328598	-1.04724	0.229908	17.5556	NP	NP	MTNR1B	No
S-VLDL-triglycerides	Fasting glucose	rs17390909	12	97868654	RMST	G	C	0.103712	-0.792206	0.0228987	-5.52239	NP	NP	(NA)	No
XS-VLDL-phospholipids	Fasting glucose	rs780093	2	27742603	GCKR	C	T	0.633319	-2.92101	0.0400332	7.2973	NP	NP	GCKR	Yes
XS-VLDL-phospholipids	Fasting glucose	rs853770	2	169749841	SPC25(dist=2897), G6PC2(dist=7909)	C	T	0.797565	0.881985	0.0421445	-7.38095	NP	NP	G6PC2	Yes
XS-VLDL-phospholipids	Fasting glucose	rs560887	2	169763148	G6PC2	C	T	0.698048	-1.91296	0.252022	18.2927	NP	NP	G6PC2	Yes
XS-VLDL-phospholipids	Fasting glucose	rs6709087	2	169799010	ABCB11	G	A	0.160134	-1.76254	0.123354	12.8	NP	NP	G6PC2	Yes
XS-VLDL-phospholipids	Fasting glucose	rs11717195	3	123082398	ADCY5	C	T	0.174492	-1.1618	0.0279066	-6.17021	NP	NP	ADCY5	Yes
XS-VLDL-phospholipids	Fasting glucose	rs10276674	7	14922007	DGKB(dist=40932), AGMO(dist=317936)	C	T	0.213619	0.820896	0.0373884	7.05882	NP	NP	DGKB (phospholipid mediated)	No
XS-VLDL-phospholipids	Fasting glucose	rs2191349	7	15064309	DGKB(dist=183234), AGMO(dist=175634)	T	G	0.478679	-0.431641	0.0521899	8.33333	NP	NP	DGKB?	No
XS-VLDL-phospholipids	Fasting glucose	rs6975024	7	44231886	GCK(dist=2864), YKT6(dist=8692)	C	T	0.116159	-1.05167	0.121213	12.6531	NP	NP	GCK	Yes
XS-VLDL-phospholipids	Fasting glucose	rs11558471	8	118185733	SLC30A8	G	A	0.363612	-1.19224	0.0334041	-6.75	NP	NP	SLC30A8	No
XS-VLDL-phospholipids	Fasting glucose	rs10787312	10	113023966	ADRA2A(dist=183304), GPAM(dist=885656)	A	G	0.901167	1.04784	0.0346173	6.77419	NP	NP	ADRA2A	No
XS-VLDL-phospholipids	Fasting glucose	rs12805422	11	45839889	SLC35C1(dist=5322), CRY2(dist=28780)	A	G	0.50043	-0.310715	0.027813	-6.21622	NP	NP	CRY2, MAPK8IP1	No
XS-VLDL-phospholipids	Fasting glucose	rs7102746	11	92666563	FAT3(dist=36928), MTNR1B(dist=36226)	C	T	0.54179	0.433772	0.0328408	6.74419	NP	NP	MTNR1B	No
XS-VLDL-phospholipids	Fasting glucose	rs10830963	11	92708710	MTNR1B	G	C	0.340908	-0.0707648	0.229908	17.5556	NP	NP	MTNR1B	No
XS-VLDL-phospholipids	Fasting glucose	rs17390909	12	97868654	RMST	G	C	0.108459	0.0868664	0.0228987	-5.52239	NP	NP	(NA)	No
XS-VLDL-triglycerides	Fasting glucose	rs853770	2	169749841	SPC25(dist=2897), G6PC2(dist=7909)	C	T	0.797565	0.651075	0.0421445	-7.38095	NP	NP	G6PC2	Yes
XS-VLDL-triglycerides	Fasting glucose	rs560887	2	169763148	G6PC2	C	T	0.698048	-2.50575	0.252022	18.2927	NP	NP	G6PC2	Yes
XS-VLDL-triglycerides	Fasting glucose	rs6709087	2	169799010	ABCB11	G	A	0.160134	-1.52309	0.123354	12.8	NP	NP	G6PC2	Yes
XS-VLDL-triglycerides	Fasting glucose	rs11717195	3	123082398	ADCY5	C	T	0.174492	-1.16746	0.0279066	-6.17021	NP	NP	ADCY5	Yes
XS-VLDL-triglycerides	Fasting glucose	rs10276674	7	14922007	DGKB(dist=40932), AGMO(dist=317936)	C	T	0.213619	1.25439	0.0373884	7.05882	NP	NP	DGKB (phospholipid mediated)	No
XS-VLDL-triglycerides	Fasting glucose	rs2191349	7	15064309	DGKB(dist=183234), AGMO(dist=175634)	T	G	0.478679	-0.886415	0.0521899	8.33333	NP	NP	DGKB?	No
XS-VLDL-triglycerides	Fasting glucose	rs6975024	7	44231886	GCK(dist=2864), YKT6(dist=8692)	C	T	0.116159	-0.853261	0.121213	12.6531	NP	NP	GCK	Yes
XS-VLDL-triglycerides	Fasting glucose	rs11558471	8	118185733	SLC30A8	G	A	0.363612	-0.18936	0.0334041	-6.75	NP	NP	SLC30A8	No
XS-VLDL-triglycerides	Fasting glucose	rs10787312	10	113023966	ADRA2A(dist=183304), GPAM(dist=885656)	A	G	0.901167	1.3191	0.0346173	6.77419	NP	NP	ADRA2A	No
XS-VLDL-triglycerides	Fasting glucose	rs12805422	11	45839889	SLC35C1(dist=5322), CRY2(dist=28780)	A	G	0.50043	-0.061683	0.027813	-6.21622	NP	NP	CRY2, MAPK8IP1	No
XS-VLDL-triglycerides	Fasting glucose	rs2524299	11	61604782	FADS2	T	A	0.252504	0.339301	0.0261766	-5.76923	NP	NP	FADS2 (lipid mediated)	No
XS-VLDL-triglycerides	Fasting glucose	rs7102746	11	92666563	FAT3(dist=36928), MTNR1B(dist=36226)	C	T	0.54179	1.81957	0.0328408	6.74419	NP	NP	MTNR1B	No
XS-VLDL-triglycerides	Fasting glucose	rs10830963	11	92708710	MTNR1B	G	C	0.340908	-0.646764	0.229908	17.5556	NP	NP	MTNR1B	No
XS-VLDL-triglycerides	Fasting glucose	rs17390909	12	97868654	RMST	G	C	0.108459	-0.603294	0.0228987	-5.52239	NP	NP	(NA)	No
IDL-phospholipids	Fasting glucose	rs853770	2	169749841	SPC25(dist=2897), G6PC2(dist=7909)	C	T	0.78739	1.00186	0.0421445	-7.38095	NP	NP	G6PC2	Yes
IDL-phospholipids	Fasting glucose	rs560887	2	169763148	G6PC2	C	T	0.699748	-1.63046	0.252022	18.2927	NP	NP	G6PC2	Yes
IDL-phospholipids	Fasting glucose	rs6709087	2	169799010	ABCB11	G	A	0.155929	-1.78703	0.123354	12.8	NP	NP	G6PC2	Yes
IDL-phospholipids	Fasting glucose	rs11717195	3	123082398	ADCY5	C	T	0.183435	-0.46372	0.0279066	-6.17021	NP	NP	ADCY5	Yes
IDL-phospholipids	Fasting glucose	rs10276674	7	14922007	DGKB(dist=40932), AGMO(dist=317936)	C	T	0.211266	0.848595	0.0373884	7.05882	NP	NP	DGKB (phospholipid mediated)	No
IDL-phospholipids	Fasting glucose	rs2191349	7	15064309	DGKB(dist=183234), AGMO(dist=175634)	T	G	0.481692	-0.184034	0.0521899	8.33333	NP	NP	DGKB?	No
IDL-phospholipids	Fasting glucose	rs6975024	7	44231886	GCK(dist=2864), YKT6(dist=8692)	C	T	0.120578	-0.820515	0.121213	12.6531	NP	NP	GCK	Yes
IDL-phospholipids	Fasting glucose	rs11558471	8	118185733	SLC30A8	G	A	0.363078	-1.59949	0.0334041	-6.75	NP	NP	SLC30A8	No
IDL-phospholipids	Fasting glucose	rs10787312	10	113023966	ADRA2A(dist=183304), GPAM(dist=885656)	A	G	0.898192	0.70399	0.0346173	6.77419	NP	NP	ADRA2A	No
IDL-phospholipids	Fasting glucose	rs12805422	11	45839889	SLC35C1(dist=5322), CRY2(dist=28780)	A	G	0.505549	-0.731643	0.027813	-6.21622	NP	NP	CRY2, MAPK8IP1	No
IDL-phospholipids	Fasting glucose	rs7102746	11	92666563	FAT3(dist=36928), MTNR1B(dist=36226)	C	T	0.562933	0.338787	0.0328408	6.74419	NP	NP	MTNR1B	No
IDL-phospholipids	Fasting glucose	rs10830963	11	92708710	MTNR1B	G	C	0.328593	0.198059	0.229908	17.5556	NP	NP	MTNR1B	No
IDL-phospholipids	Fasting glucose	rs17390909	12	97868654	RMST	G	C	0.10371	0.18357	0.0228987	-5.52239	NP	NP	(NA)	No
IDL-triglycerides	Fasting glucose	rs853770	2	169749841	SPC25(dist=2897), G6PC2(dist=7909)	C	T	0.797565	0.989556	0.0421445	-7.38095	NP	NP	G6PC2	Yes
IDL-triglycerides	Fasting glucose	rs560887	2	169763148	G6PC2	C	T	0.698048	-2.14418	0.252022	18.2927	NP	NP	G6PC2	Yes
IDL-triglycerides	Fasting glucose	rs6709087	2	169799010	ABCB11	G	A	0.160134	-1.68211	0.123354	12.8	NP	NP	G6PC2	Yes
IDL-triglycerides	Fasting glucose	rs11717195	3	123082398	ADCY5	C	T	0.174492	-1.39731	0.0279066	-6.17021	NP	NP	ADCY5	Yes
IDL-triglycerides	Fasting glucose	rs10276674	7	14922007	DGKB(dist=40932), AGMO(dist=317936)	C	T	0.213619	1.16122	0.0373884	7.05882	NP	NP	DGKB (phospholipid mediated)	No
IDL-triglycerides	Fasting glucose	rs2191349	7	15064309	DGKB(dist=183234), AGMO(dist=175634)	T	G	0.478679	-0.708435	0.0521899	8.33333	NP	NP	DGKB?	No
IDL-triglycerides	Fasting glucose	rs6975024	7	44231886	GCK(dist=2864), YKT6(dist=8692)	C	T	0.116159	-0.640821	0.121213	12.6531	NP	NP	GCK	Yes
IDL-triglycerides	Fasting glucose	rs11558471	8	118185733	SLC30A8	G	A	0.363612	-0.664595	0.0334041	-6.75	NP	NP	SLC30A8	No
IDL-triglycerides	Fasting glucose	rs10787312	10	113023966	ADRA2A(dist=183304), GPAM(dist=885656)	A	G	0.901167	1.02561	0.0346173	6.77419	NP	NP	ADRA2A	No
IDL-triglycerides	Fasting glucose	rs12805422	11	45839889	SLC35C1(dist=5322), CRY2(dist=28780)	A	G	0.50043	-0.528397	0.027813	-6.21622	NP	NP	CRY2, MAPK8IP1	No
IDL-triglycerides	Fasting glucose	rs7102746	11	92666563	FAT3(dist=36928), MTNR1B(dist=36226)	C	T	0.54179	1.00741	0.0328408	6.74419	NP	NP	MTNR1B	No
IDL-triglycerides	Fasting glucose	rs10830963	11	92708710	MTNR1B	G	C	0.340908	-0.251856	0.229908	17.5556	NP	NP	MTNR1B	No
IDL-triglycerides	Fasting glucose	rs17390909	12	97868654	RMST	G	C	0.108459	-0.544242	0.0228987	-5.52239	NP	NP	(NA)	No
L-LDL-free cholesterol	Fasting glucose	rs780093	2	27742603	GCKR	C	T	0.63622	-1.52187	0.0400332	7.2973	NP	NP	GCKR	Yes
L-LDL-free cholesterol	Fasting glucose	rs853770	2	169749841	SPC25(dist=2897), G6PC2(dist=7909)	C	T	0.787406	1.7856	0.0421445	-7.38095	NP	NP	G6PC2	Yes
L-LDL-free cholesterol	Fasting glucose	rs560887	2	169763148	G6PC2	C	T	0.699745	-1.03398	0.252022	18.2927	NP	NP	G6PC2	Yes
L-LDL-free cholesterol	Fasting glucose	rs6709087	2	169799010	ABCB11	G	A	0.155936	-1.42722	0.123354	12.8	NP	NP	G6PC2	Yes
L-LDL-free cholesterol	Fasting glucose	rs11717195	3	123082398	ADCY5	C	T	0.183421	-0.66018	0.0279066	-6.17021	NP	NP	ADCY5	Yes
L-LDL-free cholesterol	Fasting glucose	rs10276674	7	14922007	DGKB(dist=40932), AGMO(dist=317936)	C	T	0.211269	1.20674	0.0373884	7.05882	NP	NP	DGKB (phospholipid mediated)	No
L-LDL-free cholesterol	Fasting glucose	rs2191349	7	15064309	DGKB(dist=183234), AGMO(dist=175634)	T	G	0.481687	-0.539455	0.0521899	8.33333	NP	NP	DGKB?	No
L-LDL-free cholesterol	Fasting glucose	rs6975024	7	44231886	GCK(dist=2864), YKT6(dist=8692)	C	T	0.120571	-1.46361	0.121213	12.6531	NP	NP	GCK	Yes
L-LDL-free cholesterol	Fasting glucose	rs11558471	8	118185733	SLC30A8	G	A	0.363079	-1.28571	0.0334041	-6.75	NP	NP	SLC30A8	No
L-LDL-free cholesterol	Fasting glucose	rs10787312	10	113023966	ADRA2A(dist=183304), GPAM(dist=885656)	A	G	0.898197	0.561213	0.0346173	6.77419	NP	NP	ADRA2A	No
L-LDL-free cholesterol	Fasting glucose	rs12805422	11	45839889	SLC35C1(dist=5322), CRY2(dist=28780)	A	G	0.505541	-0.81287	0.027813	-6.21622	NP	NP	CRY2, MAPK8IP1	No
L-LDL-free cholesterol	Fasting glucose	rs7102746	11	92666563	FAT3(dist=36928), MTNR1B(dist=36226)	C	T	0.5629	-0.0751333	0.0328408	6.74419	NP	NP	MTNR1B	No
L-LDL-free cholesterol	Fasting glucose	rs10830963	11	92708710	MTNR1B	G	C	0.328612	-0.0187018	0.229908	17.5556	NP	NP	MTNR1B	No
L-LDL-free cholesterol	Fasting glucose	rs17390909	12	97868654	RMST	G	C	0.103717	0.443638	0.0228987	-5.52239	NP	NP	(NA)	No
XS-LDL-cholesterol	Fasting glucose	rs853770	2	169749841	SPC25(dist=2897), G6PC2(dist=7909)	C	T	0.787402	1.93254	0.0421445	-7.38095	NP	NP	G6PC2	Yes
XS-LDL-cholesterol	Fasting glucose	rs560887	2	169763148	G6PC2	C	T	0.699746	-2.17986	0.252022	18.2927	NP	NP	G6PC2	Yes
XS-LDL-cholesterol	Fasting glucose	rs6709087	2	169799010	ABCB11	G	A	0.155934	-1.1003	0.123354	12.8	NP	NP	G6PC2	Yes
XS-LDL-cholesterol	Fasting glucose	rs11717195	3	123082398	ADCY5	C	T	0.183424	-0.982007	0.0279066	-6.17021	NP	NP	ADCY5	Yes
XS-LDL-cholesterol	Fasting glucose	rs10276674	7	14922007	DGKB(dist=40932), AGMO(dist=317936)	C	T	0.211268	1.60643	0.0373884	7.05882	NP	NP	DGKB (phospholipid mediated)	No
XS-LDL-cholesterol	Fasting glucose	rs2191349	7	15064309	DGKB(dist=183234), AGMO(dist=175634)	T	G	0.481688	-1.02402	0.0521899	8.33333	NP	NP	DGKB?	No
XS-LDL-cholesterol	Fasting glucose	rs6975024	7	44231886	GCK(dist=2864), YKT6(dist=8692)	C	T	0.120573	-0.632874	0.121213	12.6531	NP	NP	GCK	Yes
XS-LDL-cholesterol	Fasting glucose	rs11558471	8	118185733	SLC30A8	G	A	0.363079	0.0695297	0.0334041	-6.75	NP	NP	SLC30A8	No
XS-LDL-cholesterol	Fasting glucose	rs10787312	10	113023966	ADRA2A(dist=183304), GPAM(dist=885656)	A	G	0.898196	0.9931	0.0346173	6.77419	NP	NP	ADRA2A	No
XS-LDL-cholesterol	Fasting glucose	rs12805422	11	45839889	SLC35C1(dist=5322), CRY2(dist=28780)	A	G	0.505543	-1.78016	0.027813	-6.21622	NP	NP	CRY2, MAPK8IP1	No
XS-LDL-cholesterol	Fasting glucose	rs2524299	11	61604782	FADS2	T	A	0.239013	-0.926211	0.0261766	-5.76923	NP	NP	FADS2 (lipid mediated)	No
XS-LDL-cholesterol	Fasting glucose	rs7102746	11	92666563	FAT3(dist=36928), MTNR1B(dist=36226)	C	T	0.562908	1.06607	0.0328408	6.74419	NP	NP	MTNR1B	No
XS-LDL-cholesterol	Fasting glucose	rs10830963	11	92708710	MTNR1B	G	C	0.328607	-0.180604	0.229908	17.5556	NP	NP	MTNR1B	No
XS-LDL-cholesterol	Fasting glucose	rs17390909	12	97868654	RMST	G	C	0.103715	0.398717	0.0228987	-5.52239	NP	NP	(NA)	No
HDL-cholesterol	Fasting glucose	rs780093	2	27742603	GCKR	C	T	0.63622	0.164601	0.0400332	7.2973	NP	NP	GCKR	Yes
HDL-cholesterol	Fasting glucose	rs853770	2	169749841	SPC25(dist=2897), G6PC2(dist=7909)	C	T	0.787406	1.77164	0.0421445	-7.38095	NP	NP	G6PC2	Yes
HDL-cholesterol	Fasting glucose	rs560887	2	169763148	G6PC2	C	T	0.699745	1.88594	0.252022	18.2927	NP	NP	G6PC2	Yes
HDL-cholesterol	Fasting glucose	rs6709087	2	169799010	ABCB11	G	A	0.155936	0.462466	0.123354	12.8	NP	NP	G6PC2	Yes
HDL-cholesterol	Fasting glucose	rs11717195	3	123082398	ADCY5	C	T	0.183421	-0.321437	0.0279066	-6.17021	NP	NP	ADCY5	Yes
HDL-cholesterol	Fasting glucose	rs10276674	7	14922007	DGKB(dist=40932), AGMO(dist=317936)	C	T	0.211269	0.467179	0.0373884	7.05882	NP	NP	DGKB (phospholipid mediated)	No
HDL-cholesterol	Fasting glucose	rs2191349	7	15064309	DGKB(dist=183234), AGMO(dist=175634)	T	G	0.481687	-0.386359	0.0521899	8.33333	NP	NP	DGKB?	No
HDL-cholesterol	Fasting glucose	rs6975024	7	44231886	GCK(dist=2864), YKT6(dist=8692)	C	T	0.120571	0.0660046	0.121213	12.6531	NP	NP	GCK	Yes
HDL-cholesterol	Fasting glucose	rs11558471	8	118185733	SLC30A8	G	A	0.363079	-0.333657	0.0334041	-6.75	NP	NP	SLC30A8	No
HDL-cholesterol	Fasting glucose	rs10787312	10	113023966	ADRA2A(dist=183304), GPAM(dist=885656)	A	G	0.898197	-0.218502	0.0346173	6.77419	NP	NP	ADRA2A	No
HDL-cholesterol	Fasting glucose	rs12805422	11	45839889	SLC35C1(dist=5322), CRY2(dist=28780)	A	G	0.505541	-1.95375	0.027813	-6.21622	NP	NP	CRY2, MAPK8IP1	No
HDL-cholesterol	Fasting glucose	rs7102746	11	92666563	FAT3(dist=36928), MTNR1B(dist=36226)	C	T	0.5629	-2.21048	0.0328408	6.74419	NP	NP	MTNR1B	No
HDL-cholesterol	Fasting glucose	rs10830963	11	92708710	MTNR1B	G	C	0.328612	0.274287	0.229908	17.5556	NP	NP	MTNR1B	No
HDL-cholesterol	Fasting glucose	rs17390909	12	97868654	RMST	G	C	0.103717	1.43212	0.0228987	-5.52239	NP	NP	(NA)	No
XL-HDL-cholesterol	Fasting glucose	rs780093	2	27742603	GCKR	C	T	0.636202	0.524564	0.0400332	7.2973	NP	NP	GCKR	Yes
XL-HDL-cholesterol	Fasting glucose	rs853770	2	169749841	SPC25(dist=2897), G6PC2(dist=7909)	C	T	0.787466	0.308997	0.0421445	-7.38095	NP	NP	G6PC2	Yes
XL-HDL-cholesterol	Fasting glucose	rs560887	2	169763148	G6PC2	C	T	0.699735	0.85886	0.252022	18.2927	NP	NP	G6PC2	Yes
XL-HDL-cholesterol	Fasting glucose	rs6709087	2	169799010	ABCB11	G	A	0.155961	0.909712	0.123354	12.8	NP	NP	G6PC2	Yes
XL-HDL-cholesterol	Fasting glucose	rs11717195	3	123082398	ADCY5	C	T	0.183368	-0.994354	0.0279066	-6.17021	NP	NP	ADCY5	Yes
XL-HDL-cholesterol	Fasting glucose	rs10276674	7	14922007	DGKB(dist=40932), AGMO(dist=317936)	C	T	0.211283	1.00959	0.0373884	7.05882	NP	NP	DGKB (phospholipid mediated)	No
XL-HDL-cholesterol	Fasting glucose	rs2191349	7	15064309	DGKB(dist=183234), AGMO(dist=175634)	T	G	0.48167	-0.661449	0.0521899	8.33333	NP	NP	DGKB?	No
XL-HDL-cholesterol	Fasting glucose	rs6975024	7	44231886	GCK(dist=2864), YKT6(dist=8692)	C	T	0.120545	0.267566	0.121213	12.6531	NP	NP	GCK	Yes
XL-HDL-cholesterol	Fasting glucose	rs11558471	8	118185733	SLC30A8	G	A	0.363082	0.802915	0.0334041	-6.75	NP	NP	SLC30A8	No
XL-HDL-cholesterol	Fasting glucose	rs10787312	10	113023966	ADRA2A(dist=183304), GPAM(dist=885656)	A	G	0.898214	0.017379	0.0346173	6.77419	NP	NP	ADRA2A	No
XL-HDL-cholesterol	Fasting glucose	rs12805422	11	45839889	SLC35C1(dist=5322), CRY2(dist=28780)	A	G	0.505511	-2.24057	0.027813	-6.21622	NP	NP	CRY2, MAPK8IP1	No
XL-HDL-cholesterol	Fasting glucose	rs7102746	11	92666563	FAT3(dist=36928), MTNR1B(dist=36226)	C	T	0.562776	-2.00018	0.0328408	6.74419	NP	NP	MTNR1B	No
XL-HDL-cholesterol	Fasting glucose	rs10830963	11	92708710	MTNR1B	G	C	0.328684	0.135592	0.229908	17.5556	NP	NP	MTNR1B	No
XL-HDL-cholesterol	Fasting glucose	rs17390909	12	97868654	RMST	G	C	0.103745	0.684083	0.0228987	-5.52239	NP	NP	(NA)	No
XL-HDL-free cholesterol	Fasting glucose	rs780093	2	27742603	GCKR	C	T	0.636205	1.52042	0.0400332	7.2973	NP	NP	GCKR	Yes
XL-HDL-free cholesterol	Fasting glucose	rs853770	2	169749841	SPC25(dist=2897), G6PC2(dist=7909)	C	T	0.787458	0.452541	0.0421445	-7.38095	NP	NP	G6PC2	Yes
XL-HDL-free cholesterol	Fasting glucose	rs560887	2	169763148	G6PC2	C	T	0.699737	1.33202	0.252022	18.2927	NP	NP	G6PC2	Yes
XL-HDL-free cholesterol	Fasting glucose	rs6709087	2	169799010	ABCB11	G	A	0.155957	1.32055	0.123354	12.8	NP	NP	G6PC2	Yes
XL-HDL-free cholesterol	Fasting glucose	rs11717195	3	123082398	ADCY5	C	T	0.183375	-1.2585	0.0279066	-6.17021	NP	NP	ADCY5	Yes
XL-HDL-free cholesterol	Fasting glucose	rs10276674	7	14922007	DGKB(dist=40932), AGMO(dist=317936)	C	T	0.211281	0.843967	0.0373884	7.05882	NP	NP	DGKB (phospholipid mediated)	No
XL-HDL-free cholesterol	Fasting glucose	rs2191349	7	15064309	DGKB(dist=183234), AGMO(dist=175634)	T	G	0.481672	-0.592912	0.0521899	8.33333	NP	NP	DGKB?	No
XL-HDL-free cholesterol	Fasting glucose	rs6975024	7	44231886	GCK(dist=2864), YKT6(dist=8692)	C	T	0.120549	0.0865944	0.121213	12.6531	NP	NP	GCK	Yes
XL-HDL-free cholesterol	Fasting glucose	rs11558471	8	118185733	SLC30A8	G	A	0.363082	0.634845	0.0334041	-6.75	NP	NP	SLC30A8	No
XL-HDL-free cholesterol	Fasting glucose	rs10787312	10	113023966	ADRA2A(dist=183304), GPAM(dist=885656)	A	G	0.898212	-0.440893	0.0346173	6.77419	NP	NP	ADRA2A	No
XL-HDL-free cholesterol	Fasting glucose	rs12805422	11	45839889	SLC35C1(dist=5322), CRY2(dist=28780)	A	G	0.505515	-1.98034	0.027813	-6.21622	NP	NP	CRY2, MAPK8IP1	No
XL-HDL-free cholesterol	Fasting glucose	rs7102746	11	92666563	FAT3(dist=36928), MTNR1B(dist=36226)	C	T	0.562792	-2.44337	0.0328408	6.74419	NP	NP	MTNR1B	No
XL-HDL-free cholesterol	Fasting glucose	rs10830963	11	92708710	MTNR1B	G	C	0.328675	-0.272323	0.229908	17.5556	NP	NP	MTNR1B	No
XL-HDL-free cholesterol	Fasting glucose	rs17390909	12	97868654	RMST	G	C	0.103741	1.06623	0.0228987	-5.52239	NP	NP	(NA)	No
XL-HDL-phospholipids	Fasting glucose	rs780093	2	27742603	GCKR	C	T	0.633319	2.36846	0.0400332	7.2973	NP	NP	GCKR	Yes
XL-HDL-phospholipids	Fasting glucose	rs853770	2	169749841	SPC25(dist=2897), G6PC2(dist=7909)	C	T	0.797565	0.473713	0.0421445	-7.38095	NP	NP	G6PC2	Yes
XL-HDL-phospholipids	Fasting glucose	rs560887	2	169763148	G6PC2	C	T	0.698048	1.73598	0.252022	18.2927	NP	NP	G6PC2	Yes
XL-HDL-phospholipids	Fasting glucose	rs6709087	2	169799010	ABCB11	G	A	0.160134	0.97209	0.123354	12.8	NP	NP	G6PC2	Yes
XL-HDL-phospholipids	Fasting glucose	rs11717195	3	123082398	ADCY5	C	T	0.174492	-1.01715	0.0279066	-6.17021	NP	NP	ADCY5	Yes
XL-HDL-phospholipids	Fasting glucose	rs10276674	7	14922007	DGKB(dist=40932), AGMO(dist=317936)	C	T	0.213619	0.426403	0.0373884	7.05882	NP	NP	DGKB (phospholipid mediated)	No
XL-HDL-phospholipids	Fasting glucose	rs2191349	7	15064309	DGKB(dist=183234), AGMO(dist=175634)	T	G	0.478679	-0.418907	0.0521899	8.33333	NP	NP	DGKB?	No
XL-HDL-phospholipids	Fasting glucose	rs6975024	7	44231886	GCK(dist=2864), YKT6(dist=8692)	C	T	0.116159	0.121903	0.121213	12.6531	NP	NP	GCK	Yes
XL-HDL-phospholipids	Fasting glucose	rs11558471	8	118185733	SLC30A8	G	A	0.363612	0.707595	0.0334041	-6.75	NP	NP	SLC30A8	No
XL-HDL-phospholipids	Fasting glucose	rs10787312	10	113023966	ADRA2A(dist=183304), GPAM(dist=885656)	A	G	0.901167	-0.70449	0.0346173	6.77419	NP	NP	ADRA2A	No
XL-HDL-phospholipids	Fasting glucose	rs12805422	11	45839889	SLC35C1(dist=5322), CRY2(dist=28780)	A	G	0.50043	-1.42011	0.027813	-6.21622	NP	NP	CRY2, MAPK8IP1	No
XL-HDL-phospholipids	Fasting glucose	rs7102746	11	92666563	FAT3(dist=36928), MTNR1B(dist=36226)	C	T	0.54179	-2.83511	0.0328408	6.74419	NP	NP	MTNR1B	No
XL-HDL-phospholipids	Fasting glucose	rs10830963	11	92708710	MTNR1B	G	C	0.340908	0.467979	0.229908	17.5556	NP	NP	MTNR1B	No
XL-HDL-phospholipids	Fasting glucose	rs17390909	12	97868654	RMST	G	C	0.108459	0.813315	0.0228987	-5.52239	NP	NP	(NA)	No
L-HDL-cholesterol	Fasting glucose	rs780093	2	27742603	GCKR	C	T	0.636223	2.55034	0.0400332	7.2973	NP	NP	GCKR	Yes
L-HDL-cholesterol	Fasting glucose	rs853770	2	169749841	SPC25(dist=2897), G6PC2(dist=7909)	C	T	0.787394	0.862597	0.0421445	-7.38095	NP	NP	G6PC2	Yes
L-HDL-cholesterol	Fasting glucose	rs560887	2	169763148	G6PC2	C	T	0.699747	2.26791	0.252022	18.2927	NP	NP	G6PC2	Yes
L-HDL-cholesterol	Fasting glucose	rs6709087	2	169799010	ABCB11	G	A	0.155931	1.10243	0.123354	12.8	NP	NP	G6PC2	Yes
L-HDL-cholesterol	Fasting glucose	rs11717195	3	123082398	ADCY5	C	T	0.191321	-1.11433	0.0279066	-6.17021	NP	NP	ADCY5	Yes
L-HDL-cholesterol	Fasting glucose	rs10276674	7	14922007	DGKB(dist=40932), AGMO(dist=317936)	C	T	0.211267	-0.0681217	0.0373884	7.05882	NP	NP	DGKB (phospholipid mediated)	No
L-HDL-cholesterol	Fasting glucose	rs2191349	7	15064309	DGKB(dist=183234), AGMO(dist=175634)	T	G	0.481691	-0.195224	0.0521899	8.33333	NP	NP	DGKB?	No
L-HDL-cholesterol	Fasting glucose	rs6975024	7	44231886	GCK(dist=2864), YKT6(dist=8692)	C	T	0.120577	0.280768	0.121213	12.6531	NP	NP	GCK	Yes
L-HDL-cholesterol	Fasting glucose	rs11558471	8	118185733	SLC30A8	G	A	0.363078	0.0661679	0.0334041	-6.75	NP	NP	SLC30A8	No
L-HDL-cholesterol	Fasting glucose	rs10787312	10	113023966	ADRA2A(dist=183304), GPAM(dist=885656)	A	G	0.898193	-0.158806	0.0346173	6.77419	NP	NP	ADRA2A	No
L-HDL-cholesterol	Fasting glucose	rs12805422	11	45839889	SLC35C1(dist=5322), CRY2(dist=28780)	A	G	0.505547	-1.4839	0.027813	-6.21622	NP	NP	CRY2, MAPK8IP1	No
L-HDL-cholesterol	Fasting glucose	rs10830963	11	92708710	MTNR1B	G	C	0.328598	0.630863	0.229908	17.5556	NP	NP	MTNR1B	No
L-HDL-cholesterol	Fasting glucose	rs17390909	12	97868654	RMST	G	C	0.103712	1.24808	0.0228987	-5.52239	NP	NP	(NA)	No
L-HDL-free cholesterol	Fasting glucose	rs853770	2	169749841	SPC25(dist=2897), G6PC2(dist=7909)	C	T	0.78739	0.693917	0.0421445	-7.38095	NP	NP	G6PC2	Yes
L-HDL-free cholesterol	Fasting glucose	rs560887	2	169763148	G6PC2	C	T	0.699748	2.29771	0.252022	18.2927	NP	NP	G6PC2	Yes
L-HDL-free cholesterol	Fasting glucose	rs6709087	2	169799010	ABCB11	G	A	0.155929	0.962484	0.123354	12.8	NP	NP	G6PC2	Yes
L-HDL-free cholesterol	Fasting glucose	rs11717195	3	123082398	ADCY5	C	T	0.183435	-0.677974	0.0279066	-6.17021	NP	NP	ADCY5	Yes
L-HDL-free cholesterol	Fasting glucose	rs10276674	7	14922007	DGKB(dist=40932), AGMO(dist=317936)	C	T	0.211266	0.0383056	0.0373884	7.05882	NP	NP	DGKB (phospholipid mediated)	No
L-HDL-free cholesterol	Fasting glucose	rs2191349	7	15064309	DGKB(dist=183234), AGMO(dist=175634)	T	G	0.481692	-0.701485	0.0521899	8.33333	NP	NP	DGKB?	No
L-HDL-free cholesterol	Fasting glucose	rs6975024	7	44231886	GCK(dist=2864), YKT6(dist=8692)	C	T	0.120578	-0.366684	0.121213	12.6531	NP	NP	GCK	Yes
L-HDL-free cholesterol	Fasting glucose	rs11558471	8	118185733	SLC30A8	G	A	0.363078	0.0848809	0.0334041	-6.75	NP	NP	SLC30A8	No
L-HDL-free cholesterol	Fasting glucose	rs10787312	10	113023966	ADRA2A(dist=183304), GPAM(dist=885656)	A	G	0.898192	-0.378802	0.0346173	6.77419	NP	NP	ADRA2A	No
L-HDL-free cholesterol	Fasting glucose	rs12805422	11	45839889	SLC35C1(dist=5322), CRY2(dist=28780)	A	G	0.505549	-1.32187	0.027813	-6.21622	NP	NP	CRY2, MAPK8IP1	No
L-HDL-free cholesterol	Fasting glucose	rs7102746	11	92666563	FAT3(dist=36928), MTNR1B(dist=36226)	C	T	0.562933	-2.85046	0.0328408	6.74419	NP	NP	MTNR1B	No
L-HDL-free cholesterol	Fasting glucose	rs10830963	11	92708710	MTNR1B	G	C	0.328593	0.32244	0.229908	17.5556	NP	NP	MTNR1B	No
L-HDL-free cholesterol	Fasting glucose	rs17390909	12	97868654	RMST	G	C	0.10371	1.06981	0.0228987	-5.52239	NP	NP	(NA)	No
S-HDL-triglycerides	Fasting glucose	rs853770	2	169749841	SPC25(dist=2897), G6PC2(dist=7909)	C	T	0.787394	0.313532	0.0421445	-7.38095	NP	NP	G6PC2	Yes
S-HDL-triglycerides	Fasting glucose	rs560887	2	169763148	G6PC2	C	T	0.699747	-2.57278	0.252022	18.2927	NP	NP	G6PC2	Yes
S-HDL-triglycerides	Fasting glucose	rs6709087	2	169799010	ABCB11	G	A	0.155931	-1.8169	0.123354	12.8	NP	NP	G6PC2	Yes
S-HDL-triglycerides	Fasting glucose	rs11717195	3	123082398	ADCY5	C	T	0.183431	-0.0134522	0.0279066	-6.17021	NP	NP	ADCY5	Yes
S-HDL-triglycerides	Fasting glucose	rs10276674	7	14922007	DGKB(dist=40932), AGMO(dist=317936)	C	T	0.211267	0.282967	0.0373884	7.05882	NP	NP	DGKB (phospholipid mediated)	No
S-HDL-triglycerides	Fasting glucose	rs2191349	7	15064309	DGKB(dist=183234), AGMO(dist=175634)	T	G	0.481691	-0.344079	0.0521899	8.33333	NP	NP	DGKB?	No
S-HDL-triglycerides	Fasting glucose	rs6975024	7	44231886	GCK(dist=2864), YKT6(dist=8692)	C	T	0.120577	-1.07213	0.121213	12.6531	NP	NP	GCK	Yes
S-HDL-triglycerides	Fasting glucose	rs11558471	8	118185733	SLC30A8	G	A	0.363078	-0.659199	0.0334041	-6.75	NP	NP	SLC30A8	No
S-HDL-triglycerides	Fasting glucose	rs10787312	10	113023966	ADRA2A(dist=183304), GPAM(dist=885656)	A	G	0.898193	0.610713	0.0346173	6.77419	NP	NP	ADRA2A	No
S-HDL-triglycerides	Fasting glucose	rs12805422	11	45839889	SLC35C1(dist=5322), CRY2(dist=28780)	A	G	0.505547	0.924344	0.027813	-6.21622	NP	NP	CRY2, MAPK8IP1	No
S-HDL-triglycerides	Fasting glucose	rs2524299	11	61604782	FADS2	T	A	0.239003	0.655235	0.0261766	-5.76923	NP	NP	FADS2 (lipid mediated)	No
S-HDL-triglycerides	Fasting glucose	rs7102746	11	92666563	FAT3(dist=36928), MTNR1B(dist=36226)	C	T	0.562925	1.77402	0.0328408	6.74419	NP	NP	MTNR1B	No
S-HDL-triglycerides	Fasting glucose	rs10830963	11	92708710	MTNR1B	G	C	0.328598	-0.545405	0.229908	17.5556	NP	NP	MTNR1B	No
S-HDL-triglycerides	Fasting glucose	rs17390909	12	97868654	RMST	G	C	0.103712	-1.06271	0.0228987	-5.52239	NP	NP	(NA)	No
Lysophosphatidylcholine 14:0	T2DM	rs10440833	6	20688121	CDKAL1	A	T	0.279	2.13313	NP	NP	0.0013103	12.9216	NP	NP
Lysophosphatidylcholine 14:0	T2DM	rs10830962	11	92698427	FAT3(dist=68792), MTNR1B(dist=4362)	C	G	0.6476	1.42544	NP	NP	0.000388665	-6.22107	NP	NP
Lysophosphatidylcholine 14:0	T2DM	rs10842993	12	27964648	KLHL42(dist=8675), PTHLH(dist=146369)	A	G	0.2046	-0.625954	NP	NP	0.000321092	-4.6867	NP	NP
Lysophosphatidylcholine 14:0	T2DM	rs11257655	10	12307894	CDC123(dist=15305), CAMK1D(dist=83689)	T	C	0.2048	1.22549	NP	NP	0.000360805	6.94261	NP	NP
Lysophosphatidylcholine 14:0	T2DM	rs11708067	3	123065778	ADCY5	A	G	0.7293	0.450893	NP	NP	0.000325019	5.23007	NP	NP
Lysophosphatidylcholine 14:0	T2DM	rs1215468	13	80707429	NDFIP2(dist=577217), SPRY2(dist=202683)	A	G	0.7155	0.289655	NP	NP	0.000304833	4.14774	NP	NP
Lysophosphatidylcholine 14:0	T2DM	rs12571751	10	80942631	ZMIZ1	A	G	0.518	2.05025	NP	NP	0.00038775	9.2897	NP	NP
Lysophosphatidylcholine 14:0	T2DM	rs13266634	8	118184783	SLC30A8	T	C	0.303	-0.961672	NP	NP	0.000829979	-9.88684	NP	NP
Lysophosphatidylcholine 14:0	T2DM	rs13293121	9	81881830	PSAT1(dist=936821), TLE4(dist=305048)	A	G	0.9433	-1.56982	NP	NP	0.000378043	6.15326	NP	NP
Lysophosphatidylcholine 14:0	T2DM	rs1495130	3	23241009	ZNF385D(dist=1448193), UBE2E2(dist=3775)	C	G	0.9013	-0.49422	NP	NP	0.000382697	6.32989	NP	NP
Lysophosphatidylcholine 14:0	T2DM	rs163184	11	2847069	KCNQ1	T	G	0.5284	0.0694981	NP	NP	0.000584806	-7.67001	NP	NP
Lysophosphatidylcholine 14:0	T2DM	rs2144908	20	42985717	HNF4A	A	G	0.1839	-0.511364	NP	NP	0.000334154	4.6867	NP	NP
Lysophosphatidylcholine 14:0	T2DM	rs2237892	11	2839751	KCNQ1	T	C	0.06	-0.0194903	NP	NP	0.000691096	-7.32423	NP	NP
Lysophosphatidylcholine 14:0	T2DM	rs2261181	12	66212318	RPSAP52	T	C	0.0884	1.3312	NP	NP	0.000275355	5.77781	NP	NP
Lysophosphatidylcholine 14:0	T2DM	rs2290203	15	91512067	LOC100507118	A	G	0.2164	0.938525	NP	NP	0.000291967	5.50545	NP	NP
Lysophosphatidylcholine 14:0	T2DM	rs231361	11	2691500	KCNQ1OT1	A	G	0.2358	-0.786834	NP	NP	0.000488167	7.67001	NP	NP
Lysophosphatidylcholine 14:0	T2DM	rs2383208	9	22132076	CDKN2B, AS1(dist=10983), DMRTA1(dist=314764)	A	G	0.8123	-0.693593	NP	NP	0.00134378	10.8982	NP	NP
Lysophosphatidylcholine 14:0	T2DM	rs243018	2	60586707	FLJ30838(dist=1295806), MIR4432(dist=27790)	C	G	0.5464	-0.39604	NP	NP	0.000316372	-8.22075	NP	NP
Lysophosphatidylcholine 14:0	T2DM	rs4237150	9	4290085	GLIS3	C	G	0.4129	1.31884	NP	NP	0.000281865	4.79579	NP	NP
Lysophosphatidylcholine 14:0	T2DM	rs4580722	4	6306144	WFS1(dist=1152), PPP2R2C(dist=16161)	A	C	0.5836	-0.84058	NP	NP	0.000424296	7.67001	NP	NP
Lysophosphatidylcholine 14:0	T2DM	rs4719433	7	15065003	DGKB(dist=183928), AGMO(dist=174940)	T	C	0.4626	1.16	NP	NP	0.000383784	-5.50545	NP	NP
Lysophosphatidylcholine 14:0	T2DM	rs5015480	10	94465559	HHEX(dist=10151), EXOC6(dist=128911)	T	C	0.3963	0.0494297	NP	NP	0.000878314	-9.14217	NP	NP
Lysophosphatidylcholine 14:0	T2DM	rs5215	11	17408630	KCNJ11	T	C	0.6366	-0.184211	NP	NP	0.000399791	-9.2897	NP	NP
Lysophosphatidylcholine 14:0	T2DM	rs6103716	20	42999630	HNF4A	A	C	0.6911	1.57912	NP	NP	0.000322944	-5.50545	NP	NP
Lysophosphatidylcholine 14:0	T2DM	rs6444187	3	186674138	ST6GAL1	C	G	0.4075	-0.462617	NP	NP	0.000393307	-6.94261	NP	NP
Lysophosphatidylcholine 14:0	T2DM	rs6494307	15	62394690	C2CD4A(dist=31574), C2CD4B(dist=61047)	C	G	0.5562	0.308824	NP	NP	0.000292779	4.79579	NP	NP
Lysophosphatidylcholine 14:0	T2DM	rs6813195	4	153520475	DKFZP434I0714(dist=60060), TMEM154(dist=26791)	T	C	0.2646	-0.813505	NP	NP	0.000313621	-5.50545	NP	NP
Lysophosphatidylcholine 14:0	T2DM	rs6928012	6	20728513	CDKAL1	T	C	0.6137	0.708812	NP	NP	0.000329188	-8.22075	NP	NP
Lysophosphatidylcholine 14:0	T2DM	rs7178572	15	77747190	HMG20A	A	G	0.2828	0.799308	NP	NP	0.000435302	-6.22107	NP	NP
Lysophosphatidylcholine 14:0	T2DM	rs7501939	17	36101156	HNF1B	T	C	0.4095	0.307985	NP	NP	0.000540926	5.77781	NP	NP
Lysophosphatidylcholine 14:0	T2DM	rs864745	7	28180556	JAZF1	T	C	0.5084	0.817121	NP	NP	0.000469056	6.94261	NP	NP
Lysophosphatidylcholine 14:0	T2DM	rs896854	8	95960511	TP53INP1	T	C	0.5073	0.941176	NP	NP	0.000347538	5.50545	NP	NP
Lysophosphatidylcholine 16:0	T2DM	rs10440833	6	20688121	CDKAL1	A	T	0.2813	0.0666667	NP	NP	0.0013103	12.9216	NP	NP
Lysophosphatidylcholine 16:0	T2DM	rs10830962	11	92698427	FAT3(dist=68792), MTNR1B(dist=4362)	C	G	0.6116	-0.930233	NP	NP	0.000388665	-6.22107	NP	NP
Lysophosphatidylcholine 16:0	T2DM	rs10842993	12	27964648	KLHL42(dist=8675), PTHLH(dist=146369)	A	G	0.2156	2.43137	NP	NP	0.000321092	-4.6867	NP	NP
Lysophosphatidylcholine 16:0	T2DM	rs11257655	10	12307894	CDC123(dist=15305), CAMK1D(dist=83689)	T	C	0.2095	1.7451	NP	NP	0.000360805	6.94261	NP	NP
Lysophosphatidylcholine 16:0	T2DM	rs11708067	3	123065778	ADCY5	A	G	0.7654	0.6875	NP	NP	0.000325019	5.23007	NP	NP
Lysophosphatidylcholine 16:0	T2DM	rs1215468	13	80707429	NDFIP2(dist=577217), SPRY2(dist=202683)	A	G	0.7248	0.0888889	NP	NP	0.000304833	4.14774	NP	NP
Lysophosphatidylcholine 16:0	T2DM	rs12571751	10	80942631	ZMIZ1	A	G	0.5247	-0.439024	NP	NP	0.00038775	9.2897	NP	NP
Lysophosphatidylcholine 16:0	T2DM	rs13266634	8	118184783	SLC30A8	T	C	0.3158	-1.18605	NP	NP	0.000829979	-9.88684	NP	NP
Lysophosphatidylcholine 16:0	T2DM	rs13293121	9	81881830	PSAT1(dist=936821), TLE4(dist=305048)	A	G	0.94	1.07955	NP	NP	0.000378043	6.15326	NP	NP
Lysophosphatidylcholine 16:0	T2DM	rs1495130	3	23241009	ZNF385D(dist=1448193), UBE2E2(dist=3775)	C	G	0.9153	0.0833333	NP	NP	0.000382697	6.32989	NP	NP
Lysophosphatidylcholine 16:0	T2DM	rs163184	11	2847069	KCNQ1	T	G	0.5078	-0.285714	NP	NP	0.000584806	-7.67001	NP	NP
Lysophosphatidylcholine 16:0	T2DM	rs2144908	20	42985717	HNF4A	A	G	0.1852	-0.5	NP	NP	0.000334154	4.6867	NP	NP
Lysophosphatidylcholine 16:0	T2DM	rs2237892	11	2839751	KCNQ1	T	C	0.0597	0.0114943	NP	NP	0.000691096	-7.32423	NP	NP
Lysophosphatidylcholine 16:0	T2DM	rs2261181	12	66212318	RPSAP52	T	C	0.0991	0.352941	NP	NP	0.000275355	5.77781	NP	NP
Lysophosphatidylcholine 16:0	T2DM	rs2290203	15	91512067	LOC100507118	A	G	0.2115	-1.1	NP	NP	0.000291967	5.50545	NP	NP
Lysophosphatidylcholine 16:0	T2DM	rs231361	11	2691500	KCNQ1OT1	A	G	0.2458	0.791667	NP	NP	0.000488167	7.67001	NP	NP
Lysophosphatidylcholine 16:0	T2DM	rs2383208	9	22132076	CDKN2B, AS1(dist=10983), DMRTA1(dist=314764)	A	G	0.829	1.38182	NP	NP	0.00134378	10.8982	NP	NP
Lysophosphatidylcholine 16:0	T2DM	rs243018	2	60586707	FLJ30838(dist=1295806), MIR4432(dist=27790)	C	G	0.5207	1.025	NP	NP	0.000316372	-8.22075	NP	NP
Lysophosphatidylcholine 16:0	T2DM	rs4237150	9	4290085	GLIS3	C	G	0.4202	-0.15	NP	NP	0.000281865	4.79579	NP	NP
Lysophosphatidylcholine 16:0	T2DM	rs4580722	4	6306144	WFS1(dist=1152), PPP2R2C(dist=16161)	A	C	0.5773	-1.97674	NP	NP	0.000424296	7.67001	NP	NP
Lysophosphatidylcholine 16:0	T2DM	rs4719433	7	15065003	DGKB(dist=183928), AGMO(dist=174940)	T	C	0.4631	-0.45	NP	NP	0.000383784	-5.50545	NP	NP
Lysophosphatidylcholine 16:0	T2DM	rs5015480	10	94465559	HHEX(dist=10151), EXOC6(dist=128911)	T	C	0.4128	1.1	NP	NP	0.000878314	-9.14217	NP	NP
Lysophosphatidylcholine 16:0	T2DM	rs5215	11	17408630	KCNJ11	T	C	0.6349	-0.097561	NP	NP	0.000399791	-9.2897	NP	NP
Lysophosphatidylcholine 16:0	T2DM	rs6103716	20	42999630	HNF4A	A	C	0.6675	-0.813953	NP	NP	0.000322944	-5.50545	NP	NP
Lysophosphatidylcholine 16:0	T2DM	rs6444187	3	186674138	ST6GAL1	C	G	0.4288	0.452381	NP	NP	0.000393307	-6.94261	NP	NP
Lysophosphatidylcholine 16:0	T2DM	rs6494307	15	62394690	C2CD4A(dist=31574), C2CD4B(dist=61047)	C	G	0.5699	-0.25	NP	NP	0.000292779	4.79579	NP	NP
Lysophosphatidylcholine 16:0	T2DM	rs6813195	4	153520475	DKFZP434I0714(dist=60060), TMEM154(dist=26791)	T	C	0.2744	-0.808511	NP	NP	0.000313621	-5.50545	NP	NP
Lysophosphatidylcholine 16:0	T2DM	rs6928012	6	20728513	CDKAL1	T	C	0.6012	0.365854	NP	NP	0.000329188	-8.22075	NP	NP
Lysophosphatidylcholine 16:0	T2DM	rs7178572	15	77747190	HMG20A	A	G	0.2957	0.930233	NP	NP	0.000435302	-6.22107	NP	NP
Lysophosphatidylcholine 16:0	T2DM	rs7501939	17	36101156	HNF1B	T	C	0.4019	0.77551	NP	NP	0.000540926	5.77781	NP	NP
Lysophosphatidylcholine 16:0	T2DM	rs864745	7	28180556	JAZF1	T	C	0.5202	-0.575	NP	NP	0.000469056	6.94261	NP	NP
Lysophosphatidylcholine 16:0	T2DM	rs896854	8	95960511	TP53INP1	T	C	0.5069	-1.95122	NP	NP	0.000347538	5.50545	NP	NP
Lysophosphatidylcholine 17:0	T2DM	rs10440833	6	20688121	CDKAL1	A	T	0.2811	0.533333	NP	NP	0.0013103	12.9216	NP	NP
Lysophosphatidylcholine 17:0	T2DM	rs10830962	11	92698427	FAT3(dist=68792), MTNR1B(dist=4362)	C	G	0.6119	-0.0338983	NP	NP	0.000388665	-6.22107	NP	NP
Lysophosphatidylcholine 17:0	T2DM	rs10842993	12	27964648	KLHL42(dist=8675), PTHLH(dist=146369)	A	G	0.2161	2.18841	NP	NP	0.000321092	-4.6867	NP	NP
Lysophosphatidylcholine 17:0	T2DM	rs11257655	10	12307894	CDC123(dist=15305), CAMK1D(dist=83689)	T	C	0.2086	1.55882	NP	NP	0.000360805	6.94261	NP	NP
Lysophosphatidylcholine 17:0	T2DM	rs11708067	3	123065778	ADCY5	A	G	0.766	0.815385	NP	NP	0.000325019	5.23007	NP	NP
Lysophosphatidylcholine 17:0	T2DM	rs1215468	13	80707429	NDFIP2(dist=577217), SPRY2(dist=202683)	A	G	0.7236	0.163934	NP	NP	0.000304833	4.14774	NP	NP
Lysophosphatidylcholine 17:0	T2DM	rs12571751	10	80942631	ZMIZ1	A	G	0.5225	-1.63636	NP	NP	0.00038775	9.2897	NP	NP
Lysophosphatidylcholine 17:0	T2DM	rs13266634	8	118184783	SLC30A8	T	C	0.318	-0.931034	NP	NP	0.000829979	-9.88684	NP	NP
Lysophosphatidylcholine 17:0	T2DM	rs13293121	9	81881830	PSAT1(dist=936821), TLE4(dist=305048)	A	G	0.9409	1.3	NP	NP	0.000378043	6.15326	NP	NP
Lysophosphatidylcholine 17:0	T2DM	rs1495130	3	23241009	ZNF385D(dist=1448193), UBE2E2(dist=3775)	C	G	0.9158	-1.29592	NP	NP	0.000382697	6.32989	NP	NP
Lysophosphatidylcholine 17:0	T2DM	rs163184	11	2847069	KCNQ1	T	G	0.5068	-1.15789	NP	NP	0.000584806	-7.67001	NP	NP
Lysophosphatidylcholine 17:0	T2DM	rs2144908	20	42985717	HNF4A	A	G	0.186	-0.111111	NP	NP	0.000334154	4.6867	NP	NP
Lysophosphatidylcholine 17:0	T2DM	rs2237892	11	2839751	KCNQ1	T	C	0.0598	0.0423729	NP	NP	0.000691096	-7.32423	NP	NP
Lysophosphatidylcholine 17:0	T2DM	rs2261181	12	66212318	RPSAP52	T	C	0.0985	-0.423913	NP	NP	0.000275355	5.77781	NP	NP
Lysophosphatidylcholine 17:0	T2DM	rs2290203	15	91512067	LOC100507118	A	G	0.2121	-0.970149	NP	NP	0.000291967	5.50545	NP	NP
Lysophosphatidylcholine 17:0	T2DM	rs231361	11	2691500	KCNQ1OT1	A	G	0.2447	0.46875	NP	NP	0.000488167	7.67001	NP	NP
Lysophosphatidylcholine 17:0	T2DM	rs2383208	9	22132076	CDKN2B, AS1(dist=10983), DMRTA1(dist=314764)	A	G	0.8306	1.30667	NP	NP	0.00134378	10.8982	NP	NP
Lysophosphatidylcholine 17:0	T2DM	rs243018	2	60586707	FLJ30838(dist=1295806), MIR4432(dist=27790)	C	G	0.5213	0.2	NP	NP	0.000316372	-8.22075	NP	NP
Lysophosphatidylcholine 17:0	T2DM	rs4237150	9	4290085	GLIS3	C	G	0.4186	-0.407407	NP	NP	0.000281865	4.79579	NP	NP
Lysophosphatidylcholine 17:0	T2DM	rs4580722	4	6306144	WFS1(dist=1152), PPP2R2C(dist=16161)	A	C	0.5759	-1.94828	NP	NP	0.000424296	7.67001	NP	NP
Lysophosphatidylcholine 17:0	T2DM	rs4719433	7	15065003	DGKB(dist=183928), AGMO(dist=174940)	T	C	0.4639	-0.314815	NP	NP	0.000383784	-5.50545	NP	NP
Lysophosphatidylcholine 17:0	T2DM	rs5015480	10	94465559	HHEX(dist=10151), EXOC6(dist=128911)	T	C	0.4138	1.62963	NP	NP	0.000878314	-9.14217	NP	NP
Lysophosphatidylcholine 17:0	T2DM	rs5215	11	17408630	KCNJ11	T	C	0.6356	-0.357143	NP	NP	0.000399791	-9.2897	NP	NP
Lysophosphatidylcholine 17:0	T2DM	rs6103716	20	42999630	HNF4A	A	C	0.6679	-0.172414	NP	NP	0.000322944	-5.50545	NP	NP
Lysophosphatidylcholine 17:0	T2DM	rs6444187	3	186674138	ST6GAL1	C	G	0.4322	0.321429	NP	NP	0.000393307	-6.94261	NP	NP
Lysophosphatidylcholine 17:0	T2DM	rs6494307	15	62394690	C2CD4A(dist=31574), C2CD4B(dist=61047)	C	G	0.5683	0.327273	NP	NP	0.000292779	4.79579	NP	NP
Lysophosphatidylcholine 17:0	T2DM	rs6813195	4	153520475	DKFZP434I0714(dist=60060), TMEM154(dist=26791)	T	C	0.2707	-0.953125	NP	NP	0.000313621	-5.50545	NP	NP
Lysophosphatidylcholine 17:0	T2DM	rs6928012	6	20728513	CDKAL1	T	C	0.6006	1.49091	NP	NP	0.000329188	-8.22075	NP	NP
Lysophosphatidylcholine 17:0	T2DM	rs7178572	15	77747190	HMG20A	A	G	0.2948	1.15517	NP	NP	0.000435302	-6.22107	NP	NP
Lysophosphatidylcholine 17:0	T2DM	rs7501939	17	36101156	HNF1B	T	C	0.3989	0.15625	NP	NP	0.000540926	5.77781	NP	NP
Lysophosphatidylcholine 17:0	T2DM	rs864745	7	28180556	JAZF1	T	C	0.5192	0.148148	NP	NP	0.000469056	6.94261	NP	NP
Lysophosphatidylcholine 17:0	T2DM	rs896854	8	95960511	TP53INP1	T	C	0.506	-1.41818	NP	NP	0.000347538	5.50545	NP	NP
Lysophosphatidylcholine 18:0	T2DM	rs10440833	6	20688121	CDKAL1	A	T	0.281	-0.0192308	NP	NP	0.0013103	12.9216	NP	NP
Lysophosphatidylcholine 18:0	T2DM	rs10830962	11	92698427	FAT3(dist=68792), MTNR1B(dist=4362)	C	G	0.6117	-0.6	NP	NP	0.000388665	-6.22107	NP	NP
Lysophosphatidylcholine 18:0	T2DM	rs10842993	12	27964648	KLHL42(dist=8675), PTHLH(dist=146369)	A	G	0.2154	1.72881	NP	NP	0.000321092	-4.6867	NP	NP
Lysophosphatidylcholine 18:0	T2DM	rs11257655	10	12307894	CDC123(dist=15305), CAMK1D(dist=83689)	T	C	0.2088	1.33898	NP	NP	0.000360805	6.94261	NP	NP
Lysophosphatidylcholine 18:0	T2DM	rs11708067	3	123065778	ADCY5	A	G	0.7653	1.30357	NP	NP	0.000325019	5.23007	NP	NP
Lysophosphatidylcholine 18:0	T2DM	rs1215468	13	80707429	NDFIP2(dist=577217), SPRY2(dist=202683)	A	G	0.7239	0.269231	NP	NP	0.000304833	4.14774	NP	NP
Lysophosphatidylcholine 18:0	T2DM	rs12571751	10	80942631	ZMIZ1	A	G	0.5245	-0.957447	NP	NP	0.00038775	9.2897	NP	NP
Lysophosphatidylcholine 18:0	T2DM	rs13266634	8	118184783	SLC30A8	T	C	0.3158	-2.02	NP	NP	0.000829979	-9.88684	NP	NP
Lysophosphatidylcholine 18:0	T2DM	rs13293121	9	81881830	PSAT1(dist=936821), TLE4(dist=305048)	A	G	0.94	0.598039	NP	NP	0.000378043	6.15326	NP	NP
Lysophosphatidylcholine 18:0	T2DM	rs1495130	3	23241009	ZNF385D(dist=1448193), UBE2E2(dist=3775)	C	G	0.9156	-0.72619	NP	NP	0.000382697	6.32989	NP	NP
Lysophosphatidylcholine 18:0	T2DM	rs163184	11	2847069	KCNQ1	T	G	0.5075	-0.375	NP	NP	0.000584806	-7.67001	NP	NP
Lysophosphatidylcholine 18:0	T2DM	rs2144908	20	42985717	HNF4A	A	G	0.1851	-0.274194	NP	NP	0.000334154	4.6867	NP	NP
Lysophosphatidylcholine 18:0	T2DM	rs2237892	11	2839751	KCNQ1	T	C	0.0594	0.584158	NP	NP	0.000691096	-7.32423	NP	NP
Lysophosphatidylcholine 18:0	T2DM	rs2261181	12	66212318	RPSAP52	T	C	0.0981	-0.025641	NP	NP	0.000275355	5.77781	NP	NP
Lysophosphatidylcholine 18:0	T2DM	rs2290203	15	91512067	LOC100507118	A	G	0.2117	-0.931034	NP	NP	0.000291967	5.50545	NP	NP
Lysophosphatidylcholine 18:0	T2DM	rs231361	11	2691500	KCNQ1OT1	A	G	0.2459	1.07273	NP	NP	0.000488167	7.67001	NP	NP
Lysophosphatidylcholine 18:0	T2DM	rs2383208	9	22132076	CDKN2B, AS1(dist=10983), DMRTA1(dist=314764)	A	G	0.829	-0.140625	NP	NP	0.00134378	10.8982	NP	NP
Lysophosphatidylcholine 18:0	T2DM	rs243018	2	60586707	FLJ30838(dist=1295806), MIR4432(dist=27790)	C	G	0.5205	0.638298	NP	NP	0.000316372	-8.22075	NP	NP
Lysophosphatidylcholine 18:0	T2DM	rs4237150	9	4290085	GLIS3	C	G	0.4199	-0.489362	NP	NP	0.000281865	4.79579	NP	NP
Lysophosphatidylcholine 18:0	T2DM	rs4580722	4	6306144	WFS1(dist=1152), PPP2R2C(dist=16161)	A	C	0.5766	-2.32653	NP	NP	0.000424296	7.67001	NP	NP
Lysophosphatidylcholine 18:0	T2DM	rs4719433	7	15065003	DGKB(dist=183928), AGMO(dist=174940)	T	C	0.4632	-0.425532	NP	NP	0.000383784	-5.50545	NP	NP
Lysophosphatidylcholine 18:0	T2DM	rs5015480	10	94465559	HHEX(dist=10151), EXOC6(dist=128911)	T	C	0.4128	0.617021	NP	NP	0.000878314	-9.14217	NP	NP
Lysophosphatidylcholine 18:0	T2DM	rs5215	11	17408630	KCNJ11	T	C	0.635	0.458333	NP	NP	0.000399791	-9.2897	NP	NP
Lysophosphatidylcholine 18:0	T2DM	rs6103716	20	42999630	HNF4A	A	C	0.668	-0.96	NP	NP	0.000322944	-5.50545	NP	NP
Lysophosphatidylcholine 18:0	T2DM	rs6444187	3	186674138	ST6GAL1	C	G	0.43	0.125	NP	NP	0.000393307	-6.94261	NP	NP
Lysophosphatidylcholine 18:0	T2DM	rs6494307	15	62394690	C2CD4A(dist=31574), C2CD4B(dist=61047)	C	G	0.5703	0.787234	NP	NP	0.000292779	4.79579	NP	NP
Lysophosphatidylcholine 18:0	T2DM	rs6813195	4	153520475	DKFZP434I0714(dist=60060), TMEM154(dist=26791)	T	C	0.2739	-0.111111	NP	NP	0.000313621	-5.50545	NP	NP
Lysophosphatidylcholine 18:0	T2DM	rs6928012	6	20728513	CDKAL1	T	C	0.601	0.808511	NP	NP	0.000329188	-8.22075	NP	NP
Lysophosphatidylcholine 18:0	T2DM	rs7178572	15	77747190	HMG20A	A	G	0.2952	1.24	NP	NP	0.000435302	-6.22107	NP	NP
Lysophosphatidylcholine 18:0	T2DM	rs7501939	17	36101156	HNF1B	T	C	0.4011	0.196429	NP	NP	0.000540926	5.77781	NP	NP
Lysophosphatidylcholine 18:0	T2DM	rs864745	7	28180556	JAZF1	T	C	0.5197	-1.06522	NP	NP	0.000469056	6.94261	NP	NP
Lysophosphatidylcholine 18:0	T2DM	rs896854	8	95960511	TP53INP1	T	C	0.5061	-1.87234	NP	NP	0.000347538	5.50545	NP	NP
Lysophosphatidylcholine 18:1	T2DM	rs10440833	6	20688121	CDKAL1	A	T	0.2809	0.155172	NP	NP	0.0013103	12.9216	NP	NP
Lysophosphatidylcholine 18:1	T2DM	rs10830962	11	92698427	FAT3(dist=68792), MTNR1B(dist=4362)	C	G	0.6101	-1.30357	NP	NP	0.000388665	-6.22107	NP	NP
Lysophosphatidylcholine 18:1	T2DM	rs10842993	12	27964648	KLHL42(dist=8675), PTHLH(dist=146369)	A	G	0.2161	1.93939	NP	NP	0.000321092	-4.6867	NP	NP
Lysophosphatidylcholine 18:1	T2DM	rs11257655	10	12307894	CDC123(dist=15305), CAMK1D(dist=83689)	T	C	0.2082	1.90769	NP	NP	0.000360805	6.94261	NP	NP
Lysophosphatidylcholine 18:1	T2DM	rs11708067	3	123065778	ADCY5	A	G	0.7683	1.06349	NP	NP	0.000325019	5.23007	NP	NP
Lysophosphatidylcholine 18:1	T2DM	rs1215468	13	80707429	NDFIP2(dist=577217), SPRY2(dist=202683)	A	G	0.7233	-0.206897	NP	NP	0.000304833	4.14774	NP	NP
Lysophosphatidylcholine 18:1	T2DM	rs12571751	10	80942631	ZMIZ1	A	G	0.5236	-1.28846	NP	NP	0.00038775	9.2897	NP	NP
Lysophosphatidylcholine 18:1	T2DM	rs13266634	8	118184783	SLC30A8	T	C	0.3175	-0.410714	NP	NP	0.000829979	-9.88684	NP	NP
Lysophosphatidylcholine 18:1	T2DM	rs13293121	9	81881830	PSAT1(dist=936821), TLE4(dist=305048)	A	G	0.9409	2.25217	NP	NP	0.000378043	6.15326	NP	NP
Lysophosphatidylcholine 18:1	T2DM	rs1495130	3	23241009	ZNF385D(dist=1448193), UBE2E2(dist=3775)	C	G	0.9158	-0.478723	NP	NP	0.000382697	6.32989	NP	NP
Lysophosphatidylcholine 18:1	T2DM	rs163184	11	2847069	KCNQ1	T	G	0.5075	0.407407	NP	NP	0.000584806	-7.67001	NP	NP
Lysophosphatidylcholine 18:1	T2DM	rs2144908	20	42985717	HNF4A	A	G	0.1843	0.84058	NP	NP	0.000334154	4.6867	NP	NP
Lysophosphatidylcholine 18:1	T2DM	rs2237892	11	2839751	KCNQ1	T	C	0.0603	1.03571	NP	NP	0.000691096	-7.32423	NP	NP
Lysophosphatidylcholine 18:1	T2DM	rs2261181	12	66212318	RPSAP52	T	C	0.0983	0	NP	NP	0.000275355	5.77781	NP	NP
Lysophosphatidylcholine 18:1	T2DM	rs2290203	15	91512067	LOC100507118	A	G	0.2118	-1.54688	NP	NP	0.000291967	5.50545	NP	NP
Lysophosphatidylcholine 18:1	T2DM	rs231361	11	2691500	KCNQ1OT1	A	G	0.2446	0.532258	NP	NP	0.000488167	7.67001	NP	NP
Lysophosphatidylcholine 18:1	T2DM	rs2383208	9	22132076	CDKN2B, AS1(dist=10983), DMRTA1(dist=314764)	A	G	0.8292	0.819444	NP	NP	0.00134378	10.8982	NP	NP
Lysophosphatidylcholine 18:1	T2DM	rs243018	2	60586707	FLJ30838(dist=1295806), MIR4432(dist=27790)	C	G	0.5222	0.365385	NP	NP	0.000316372	-8.22075	NP	NP
Lysophosphatidylcholine 18:1	T2DM	rs4237150	9	4290085	GLIS3	C	G	0.4201	-0.615385	NP	NP	0.000281865	4.79579	NP	NP
Lysophosphatidylcholine 18:1	T2DM	rs4580722	4	6306144	WFS1(dist=1152), PPP2R2C(dist=16161)	A	C	0.5772	-2.38182	NP	NP	0.000424296	7.67001	NP	NP
Lysophosphatidylcholine 18:1	T2DM	rs4719433	7	15065003	DGKB(dist=183928), AGMO(dist=174940)	T	C	0.4637	-0.230769	NP	NP	0.000383784	-5.50545	NP	NP
Lysophosphatidylcholine 18:1	T2DM	rs5015480	10	94465559	HHEX(dist=10151), EXOC6(dist=128911)	T	C	0.4144	1.15385	NP	NP	0.000878314	-9.14217	NP	NP
Lysophosphatidylcholine 18:1	T2DM	rs5215	11	17408630	KCNJ11	T	C	0.6362	-0.358491	NP	NP	0.000399791	-9.2897	NP	NP
Lysophosphatidylcholine 18:1	T2DM	rs6103716	20	42999630	HNF4A	A	C	0.6682	-1.81818	NP	NP	0.000322944	-5.50545	NP	NP
Lysophosphatidylcholine 18:1	T2DM	rs6444187	3	186674138	ST6GAL1	C	G	0.4325	0.62963	NP	NP	0.000393307	-6.94261	NP	NP
Lysophosphatidylcholine 18:1	T2DM	rs6494307	15	62394690	C2CD4A(dist=31574), C2CD4B(dist=61047)	C	G	0.5698	1.03846	NP	NP	0.000292779	4.79579	NP	NP
Lysophosphatidylcholine 18:1	T2DM	rs6813195	4	153520475	DKFZP434I0714(dist=60060), TMEM154(dist=26791)	T	C	0.2721	-0.0655738	NP	NP	0.000313621	-5.50545	NP	NP
Lysophosphatidylcholine 18:1	T2DM	rs6928012	6	20728513	CDKAL1	T	C	0.5996	0.584906	NP	NP	0.000329188	-8.22075	NP	NP
Lysophosphatidylcholine 18:1	T2DM	rs7178572	15	77747190	HMG20A	A	G	0.2964	0.696429	NP	NP	0.000435302	-6.22107	NP	NP
Lysophosphatidylcholine 18:1	T2DM	rs7501939	17	36101156	HNF1B	T	C	0.3993	2.19355	NP	NP	0.000540926	5.77781	NP	NP
Lysophosphatidylcholine 18:1	T2DM	rs864745	7	28180556	JAZF1	T	C	0.5176	-0.384615	NP	NP	0.000469056	6.94261	NP	NP
Lysophosphatidylcholine 18:1	T2DM	rs896854	8	95960511	TP53INP1	T	C	0.5064	-1.53846	NP	NP	0.000347538	5.50545	NP	NP
Lysophosphatidylcholine 22:0	T2DM	rs10440833	6	20688121	CDKAL1	A	T	0.279	0.675472	NP	NP	0.0013103	12.9216	NP	NP
Lysophosphatidylcholine 22:0	T2DM	rs10830962	11	92698427	FAT3(dist=68792), MTNR1B(dist=4362)	C	G	0.6474	-1.72656	NP	NP	0.000388665	-6.22107	NP	NP
Lysophosphatidylcholine 22:0	T2DM	rs10842993	12	27964648	KLHL42(dist=8675), PTHLH(dist=146369)	A	G	0.2029	0.445183	NP	NP	0.000321092	-4.6867	NP	NP
Lysophosphatidylcholine 22:0	T2DM	rs11257655	10	12307894	CDC123(dist=15305), CAMK1D(dist=83689)	T	C	0.2046	1.62	NP	NP	0.000360805	6.94261	NP	NP
Lysophosphatidylcholine 22:0	T2DM	rs11708067	3	123065778	ADCY5	A	G	0.7303	0.559603	NP	NP	0.000325019	5.23007	NP	NP
Lysophosphatidylcholine 22:0	T2DM	rs1215468	13	80707429	NDFIP2(dist=577217), SPRY2(dist=202683)	A	G	0.7154	-0.884892	NP	NP	0.000304833	4.14774	NP	NP
Lysophosphatidylcholine 22:0	T2DM	rs12571751	10	80942631	ZMIZ1	A	G	0.5185	-1.05372	NP	NP	0.00038775	9.2897	NP	NP
Lysophosphatidylcholine 22:0	T2DM	rs13266634	8	118184783	SLC30A8	T	C	0.3022	-0.670588	NP	NP	0.000829979	-9.88684	NP	NP
Lysophosphatidylcholine 22:0	T2DM	rs13293121	9	81881830	PSAT1(dist=936821), TLE4(dist=305048)	A	G	0.9423	0.855903	NP	NP	0.000378043	6.15326	NP	NP
Lysophosphatidylcholine 22:0	T2DM	rs1495130	3	23241009	ZNF385D(dist=1448193), UBE2E2(dist=3775)	C	G	0.9016	-1.21267	NP	NP	0.000382697	6.32989	NP	NP
Lysophosphatidylcholine 22:0	T2DM	rs163184	11	2847069	KCNQ1	T	G	0.5296	-0.573276	NP	NP	0.000584806	-7.67001	NP	NP
Lysophosphatidylcholine 22:0	T2DM	rs2144908	20	42985717	HNF4A	A	G	0.1823	-0.219269	NP	NP	0.000334154	4.6867	NP	NP
Lysophosphatidylcholine 22:0	T2DM	rs2237892	11	2839751	KCNQ1	T	C	0.06	0.693609	NP	NP	0.000691096	-7.32423	NP	NP
Lysophosphatidylcholine 22:0	T2DM	rs2261181	12	66212318	RPSAP52	T	C	0.0885	-0.468354	NP	NP	0.000275355	5.77781	NP	NP
Lysophosphatidylcholine 22:0	T2DM	rs2290203	15	91512067	LOC100507118	A	G	0.2162	-1.95833	NP	NP	0.000291967	5.50545	NP	NP
Lysophosphatidylcholine 22:0	T2DM	rs231361	11	2691500	KCNQ1OT1	A	G	0.2345	-0.0863787	NP	NP	0.000488167	7.67001	NP	NP
Lysophosphatidylcholine 22:0	T2DM	rs2383208	9	22132076	CDKN2B, AS1(dist=10983), DMRTA1(dist=314764)	A	G	0.8134	1.52744	NP	NP	0.00134378	10.8982	NP	NP
Lysophosphatidylcholine 22:0	T2DM	rs243018	2	60586707	FLJ30838(dist=1295806), MIR4432(dist=27790)	C	G	0.5466	-0.283951	NP	NP	0.000316372	-8.22075	NP	NP
Lysophosphatidylcholine 22:0	T2DM	rs4237150	9	4290085	GLIS3	C	G	0.4131	-0.168067	NP	NP	0.000281865	4.79579	NP	NP
Lysophosphatidylcholine 22:0	T2DM	rs4580722	4	6306144	WFS1(dist=1152), PPP2R2C(dist=16161)	A	C	0.5826	-1.37698	NP	NP	0.000424296	7.67001	NP	NP
Lysophosphatidylcholine 22:0	T2DM	rs4719433	7	15065003	DGKB(dist=183928), AGMO(dist=174940)	T	C	0.4631	-2.0251	NP	NP	0.000383784	-5.50545	NP	NP
Lysophosphatidylcholine 22:0	T2DM	rs5015480	10	94465559	HHEX(dist=10151), EXOC6(dist=128911)	T	C	0.3961	-0.766667	NP	NP	0.000878314	-9.14217	NP	NP
Lysophosphatidylcholine 22:0	T2DM	rs5215	11	17408630	KCNJ11	T	C	0.6359	1.05263	NP	NP	0.000399791	-9.2897	NP	NP
Lysophosphatidylcholine 22:0	T2DM	rs6103716	20	42999630	HNF4A	A	C	0.6911	-0.567164	NP	NP	0.000322944	-5.50545	NP	NP
Lysophosphatidylcholine 22:0	T2DM	rs6444187	3	186674138	ST6GAL1	C	G	0.4082	0.966805	NP	NP	0.000393307	-6.94261	NP	NP
Lysophosphatidylcholine 22:0	T2DM	rs6494307	15	62394690	C2CD4A(dist=31574), C2CD4B(dist=61047)	C	G	0.5573	0.37551	NP	NP	0.000292779	4.79579	NP	NP
Lysophosphatidylcholine 22:0	T2DM	rs6813195	4	153520475	DKFZP434I0714(dist=60060), TMEM154(dist=26791)	T	C	0.264	-0.49359	NP	NP	0.000313621	-5.50545	NP	NP
Lysophosphatidylcholine 22:0	T2DM	rs6928012	6	20728513	CDKAL1	T	C	0.6126	0.378601	NP	NP	0.000329188	-8.22075	NP	NP
Lysophosphatidylcholine 22:0	T2DM	rs7178572	15	77747190	HMG20A	A	G	0.2834	-0.65625	NP	NP	0.000435302	-6.22107	NP	NP
Lysophosphatidylcholine 22:0	T2DM	rs7501939	17	36101156	HNF1B	T	C	0.4093	-0.817121	NP	NP	0.000540926	5.77781	NP	NP
Lysophosphatidylcholine 22:0	T2DM	rs864745	7	28180556	JAZF1	T	C	0.5081	0.0714286	NP	NP	0.000469056	6.94261	NP	NP
Lysophosphatidylcholine 22:0	T2DM	rs896854	8	95960511	TP53INP1	T	C	0.5065	0.327586	NP	NP	0.000347538	5.50545	NP	NP
Lysophosphatidylcholine alkyl-acyl 16:1	T2DM	rs10440833	6	20688121	CDKAL1	A	T	0.279	0.670719	NP	NP	0.0013103	12.9216	NP	NP
Lysophosphatidylcholine alkyl-acyl 16:1	T2DM	rs10830962	11	92698427	FAT3(dist=68792), MTNR1B(dist=4362)	C	G	0.648	0.754386	NP	NP	0.000388665	-6.22107	NP	NP
Lysophosphatidylcholine alkyl-acyl 16:1	T2DM	rs10842993	12	27964648	KLHL42(dist=8675), PTHLH(dist=146369)	A	G	0.2047	0.44186	NP	NP	0.000321092	-4.6867	NP	NP
Lysophosphatidylcholine alkyl-acyl 16:1	T2DM	rs11257655	10	12307894	CDC123(dist=15305), CAMK1D(dist=83689)	T	C	0.2044	-0.128125	NP	NP	0.000360805	6.94261	NP	NP
Lysophosphatidylcholine alkyl-acyl 16:1	T2DM	rs11708067	3	123065778	ADCY5	A	G	0.7288	-0.148649	NP	NP	0.000325019	5.23007	NP	NP
Lysophosphatidylcholine alkyl-acyl 16:1	T2DM	rs1215468	13	80707429	NDFIP2(dist=577217), SPRY2(dist=202683)	A	G	0.7155	-1.19713	NP	NP	0.000304833	4.14774	NP	NP
Lysophosphatidylcholine alkyl-acyl 16:1	T2DM	rs12571751	10	80942631	ZMIZ1	A	G	0.5185	0.726804	NP	NP	0.00038775	9.2897	NP	NP
Lysophosphatidylcholine alkyl-acyl 16:1	T2DM	rs13266634	8	118184783	SLC30A8	T	C	0.3029	-0.964539	NP	NP	0.000829979	-9.88684	NP	NP
Lysophosphatidylcholine alkyl-acyl 16:1	T2DM	rs13293121	9	81881830	PSAT1(dist=936821), TLE4(dist=305048)	A	G	0.9432	3.04535	NP	NP	0.000378043	6.15326	NP	NP
Lysophosphatidylcholine alkyl-acyl 16:1	T2DM	rs1495130	3	23241009	ZNF385D(dist=1448193), UBE2E2(dist=3775)	C	G	0.9014	0.428994	NP	NP	0.000382697	6.32989	NP	NP
Lysophosphatidylcholine alkyl-acyl 16:1	T2DM	rs163184	11	2847069	KCNQ1	T	G	0.5284	1.28958	NP	NP	0.000584806	-7.67001	NP	NP
Lysophosphatidylcholine alkyl-acyl 16:1	T2DM	rs2144908	20	42985717	HNF4A	A	G	0.184	-0.498069	NP	NP	0.000334154	4.6867	NP	NP
Lysophosphatidylcholine alkyl-acyl 16:1	T2DM	rs2237892	11	2839751	KCNQ1	T	C	0.06	-1.00158	NP	NP	0.000691096	-7.32423	NP	NP
Lysophosphatidylcholine alkyl-acyl 16:1	T2DM	rs2261181	12	66212318	RPSAP52	T	C	0.0882	-0.533769	NP	NP	0.000275355	5.77781	NP	NP
Lysophosphatidylcholine alkyl-acyl 16:1	T2DM	rs2290203	15	91512067	LOC100507118	A	G	0.217	-0.231707	NP	NP	0.000291967	5.50545	NP	NP
Lysophosphatidylcholine alkyl-acyl 16:1	T2DM	rs231361	11	2691500	KCNQ1OT1	A	G	0.2354	0.171429	NP	NP	0.000488167	7.67001	NP	NP
Lysophosphatidylcholine alkyl-acyl 16:1	T2DM	rs2383208	9	22132076	CDKN2B, AS1(dist=10983), DMRTA1(dist=314764)	A	G	0.8122	1.13105	NP	NP	0.00134378	10.8982	NP	NP
Lysophosphatidylcholine alkyl-acyl 16:1	T2DM	rs243018	2	60586707	FLJ30838(dist=1295806), MIR4432(dist=27790)	C	G	0.5463	-1.45455	NP	NP	0.000316372	-8.22075	NP	NP
Lysophosphatidylcholine alkyl-acyl 16:1	T2DM	rs4237150	9	4290085	GLIS3	C	G	0.4127	0.863415	NP	NP	0.000281865	4.79579	NP	NP
Lysophosphatidylcholine alkyl-acyl 16:1	T2DM	rs4580722	4	6306144	WFS1(dist=1152), PPP2R2C(dist=16161)	A	C	0.5837	0.320197	NP	NP	0.000424296	7.67001	NP	NP
Lysophosphatidylcholine alkyl-acyl 16:1	T2DM	rs4719433	7	15065003	DGKB(dist=183928), AGMO(dist=174940)	T	C	0.4626	0.199005	NP	NP	0.000383784	-5.50545	NP	NP
Lysophosphatidylcholine alkyl-acyl 16:1	T2DM	rs5015480	10	94465559	HHEX(dist=10151), EXOC6(dist=128911)	T	C	0.3962	0.396078	NP	NP	0.000878314	-9.14217	NP	NP
Lysophosphatidylcholine alkyl-acyl 16:1	T2DM	rs5215	11	17408630	KCNJ11	T	C	0.6366	0.0681818	NP	NP	0.000399791	-9.2897	NP	NP
Lysophosphatidylcholine alkyl-acyl 16:1	T2DM	rs6103716	20	42999630	HNF4A	A	C	0.6909	1.09689	NP	NP	0.000322944	-5.50545	NP	NP
Lysophosphatidylcholine alkyl-acyl 16:1	T2DM	rs6444187	3	186674138	ST6GAL1	C	G	0.4072	1.49057	NP	NP	0.000393307	-6.94261	NP	NP
Lysophosphatidylcholine alkyl-acyl 16:1	T2DM	rs6494307	15	62394690	C2CD4A(dist=31574), C2CD4B(dist=61047)	C	G	0.5562	-0.638191	NP	NP	0.000292779	4.79579	NP	NP
Lysophosphatidylcholine alkyl-acyl 16:1	T2DM	rs6813195	4	153520475	DKFZP434I0714(dist=60060), TMEM154(dist=26791)	T	C	0.2653	-0.0166667	NP	NP	0.000313621	-5.50545	NP	NP
Lysophosphatidylcholine alkyl-acyl 16:1	T2DM	rs6928012	6	20728513	CDKAL1	T	C	0.614	2.53992	NP	NP	0.000329188	-8.22075	NP	NP
Lysophosphatidylcholine alkyl-acyl 16:1	T2DM	rs7178572	15	77747190	HMG20A	A	G	0.2828	0.348432	NP	NP	0.000435302	-6.22107	NP	NP
Lysophosphatidylcholine alkyl-acyl 16:1	T2DM	rs7501939	17	36101156	HNF1B	T	C	0.4096	-1.42912	NP	NP	0.000540926	5.77781	NP	NP
Lysophosphatidylcholine alkyl-acyl 16:1	T2DM	rs864745	7	28180556	JAZF1	T	C	0.5085	1.36328	NP	NP	0.000469056	6.94261	NP	NP
Lysophosphatidylcholine alkyl-acyl 16:1	T2DM	rs896854	8	95960511	TP53INP1	T	C	0.507	0.0775194	NP	NP	0.000347538	5.50545	NP	NP
Phosphatidylcholine alkyl-acyl 34:1	T2DM	rs10440833	6	20688121	CDKAL1	A	T	0.279	0.0131579	NP	NP	0.0013103	12.9216	NP	NP
Phosphatidylcholine alkyl-acyl 34:1	T2DM	rs10830962	11	92698427	FAT3(dist=68792), MTNR1B(dist=4362)	C	G	0.647	1.48387	NP	NP	0.000388665	-6.22107	NP	NP
Phosphatidylcholine alkyl-acyl 34:1	T2DM	rs10842993	12	27964648	KLHL42(dist=8675), PTHLH(dist=146369)	A	G	0.2038	-0.052	NP	NP	0.000321092	-4.6867	NP	NP
Phosphatidylcholine alkyl-acyl 34:1	T2DM	rs11257655	10	12307894	CDC123(dist=15305), CAMK1D(dist=83689)	T	C	0.2046	-0.436066	NP	NP	0.000360805	6.94261	NP	NP
Phosphatidylcholine alkyl-acyl 34:1	T2DM	rs11708067	3	123065778	ADCY5	A	G	0.7293	1.69444	NP	NP	0.000325019	5.23007	NP	NP
Phosphatidylcholine alkyl-acyl 34:1	T2DM	rs1215468	13	80707429	NDFIP2(dist=577217), SPRY2(dist=202683)	A	G	0.7154	0.611511	NP	NP	0.000304833	4.14774	NP	NP
Phosphatidylcholine alkyl-acyl 34:1	T2DM	rs12571751	10	80942631	ZMIZ1	A	G	0.5186	-0.552632	NP	NP	0.00038775	9.2897	NP	NP
Phosphatidylcholine alkyl-acyl 34:1	T2DM	rs13266634	8	118184783	SLC30A8	T	C	0.3028	-0.620818	NP	NP	0.000829979	-9.88684	NP	NP
Phosphatidylcholine alkyl-acyl 34:1	T2DM	rs13293121	9	81881830	PSAT1(dist=936821), TLE4(dist=305048)	A	G	0.9423	0.94843	NP	NP	0.000378043	6.15326	NP	NP
Phosphatidylcholine alkyl-acyl 34:1	T2DM	rs1495130	3	23241009	ZNF385D(dist=1448193), UBE2E2(dist=3775)	C	G	0.9016	1.48632	NP	NP	0.000382697	6.32989	NP	NP
Phosphatidylcholine alkyl-acyl 34:1	T2DM	rs163184	11	2847069	KCNQ1	T	G	0.5262	0.489796	NP	NP	0.000584806	-7.67001	NP	NP
Phosphatidylcholine alkyl-acyl 34:1	T2DM	rs2144908	20	42985717	HNF4A	A	G	0.184	1.09804	NP	NP	0.000334154	4.6867	NP	NP
Phosphatidylcholine alkyl-acyl 34:1	T2DM	rs2237892	11	2839751	KCNQ1	T	C	0.06	-1.14603	NP	NP	0.000691096	-7.32423	NP	NP
Phosphatidylcholine alkyl-acyl 34:1	T2DM	rs2261181	12	66212318	RPSAP52	T	C	0.0879	-2.88143	NP	NP	0.000275355	5.77781	NP	NP
Phosphatidylcholine alkyl-acyl 34:1	T2DM	rs2290203	15	91512067	LOC100507118	A	G	0.2167	0.573222	NP	NP	0.000291967	5.50545	NP	NP
Phosphatidylcholine alkyl-acyl 34:1	T2DM	rs231361	11	2691500	KCNQ1OT1	A	G	0.2321	-0.644828	NP	NP	0.000488167	7.67001	NP	NP
Phosphatidylcholine alkyl-acyl 34:1	T2DM	rs2383208	9	22132076	CDKN2B, AS1(dist=10983), DMRTA1(dist=314764)	A	G	0.8124	-0.531073	NP	NP	0.00134378	10.8982	NP	NP
Phosphatidylcholine alkyl-acyl 34:1	T2DM	rs243018	2	60586707	FLJ30838(dist=1295806), MIR4432(dist=27790)	C	G	0.5457	-0.712042	NP	NP	0.000316372	-8.22075	NP	NP
Phosphatidylcholine alkyl-acyl 34:1	T2DM	rs4237150	9	4290085	GLIS3	C	G	0.4128	-1.50761	NP	NP	0.000281865	4.79579	NP	NP
Phosphatidylcholine alkyl-acyl 34:1	T2DM	rs4580722	4	6306144	WFS1(dist=1152), PPP2R2C(dist=16161)	A	C	0.5837	1.09091	NP	NP	0.000424296	7.67001	NP	NP
Phosphatidylcholine alkyl-acyl 34:1	T2DM	rs4719433	7	15065003	DGKB(dist=183928), AGMO(dist=174940)	T	C	0.4626	-1.17526	NP	NP	0.000383784	-5.50545	NP	NP
Phosphatidylcholine alkyl-acyl 34:1	T2DM	rs5015480	10	94465559	HHEX(dist=10151), EXOC6(dist=128911)	T	C	0.3964	0.15444	NP	NP	0.000878314	-9.14217	NP	NP
Phosphatidylcholine alkyl-acyl 34:1	T2DM	rs5215	11	17408630	KCNJ11	T	C	0.6365	3.13127	NP	NP	0.000399791	-9.2897	NP	NP
Phosphatidylcholine alkyl-acyl 34:1	T2DM	rs6103716	20	42999630	HNF4A	A	C	0.6904	-0.153025	NP	NP	0.000322944	-5.50545	NP	NP
Phosphatidylcholine alkyl-acyl 34:1	T2DM	rs6444187	3	186674138	ST6GAL1	C	G	0.4071	0.932039	NP	NP	0.000393307	-6.94261	NP	NP
Phosphatidylcholine alkyl-acyl 34:1	T2DM	rs6494307	15	62394690	C2CD4A(dist=31574), C2CD4B(dist=61047)	C	G	0.5569	-0.911458	NP	NP	0.000292779	4.79579	NP	NP
Phosphatidylcholine alkyl-acyl 34:1	T2DM	rs6813195	4	153520475	DKFZP434I0714(dist=60060), TMEM154(dist=26791)	T	C	0.266	0.71875	NP	NP	0.000313621	-5.50545	NP	NP
Phosphatidylcholine alkyl-acyl 34:1	T2DM	rs6928012	6	20728513	CDKAL1	T	C	0.6136	0.245059	NP	NP	0.000329188	-8.22075	NP	NP
Phosphatidylcholine alkyl-acyl 34:1	T2DM	rs7178572	15	77747190	HMG20A	A	G	0.2824	-2.16	NP	NP	0.000435302	-6.22107	NP	NP
Phosphatidylcholine alkyl-acyl 34:1	T2DM	rs7501939	17	36101156	HNF1B	T	C	0.4099	-0.188755	NP	NP	0.000540926	5.77781	NP	NP
Phosphatidylcholine alkyl-acyl 34:1	T2DM	rs864745	7	28180556	JAZF1	T	C	0.5087	0.199203	NP	NP	0.000469056	6.94261	NP	NP
Phosphatidylcholine alkyl-acyl 34:1	T2DM	rs896854	8	95960511	TP53INP1	T	C	0.5069	-0.287938	NP	NP	0.000347538	5.50545	NP	NP
Phosphatidylcholine alkyl-acyl 34:3	T2DM	rs10440833	6	20688121	CDKAL1	A	T	0.279	1.68054	NP	NP	0.0013103	12.9216	NP	NP
Phosphatidylcholine alkyl-acyl 34:3	T2DM	rs10830962	11	92698427	FAT3(dist=68792), MTNR1B(dist=4362)	C	G	0.6479	0.772926	NP	NP	0.000388665	-6.22107	NP	NP
Phosphatidylcholine alkyl-acyl 34:3	T2DM	rs10842993	12	27964648	KLHL42(dist=8675), PTHLH(dist=146369)	A	G	0.2052	1.0613	NP	NP	0.000321092	-4.6867	NP	NP
Phosphatidylcholine alkyl-acyl 34:3	T2DM	rs11257655	10	12307894	CDC123(dist=15305), CAMK1D(dist=83689)	T	C	0.2042	-1.11672	NP	NP	0.000360805	6.94261	NP	NP
Phosphatidylcholine alkyl-acyl 34:3	T2DM	rs11708067	3	123065778	ADCY5	A	G	0.7293	1.04484	NP	NP	0.000325019	5.23007	NP	NP
Phosphatidylcholine alkyl-acyl 34:3	T2DM	rs1215468	13	80707429	NDFIP2(dist=577217), SPRY2(dist=202683)	A	G	0.7151	0.207746	NP	NP	0.000304833	4.14774	NP	NP
Phosphatidylcholine alkyl-acyl 34:3	T2DM	rs12571751	10	80942631	ZMIZ1	A	G	0.518	0.0964467	NP	NP	0.00038775	9.2897	NP	NP
Phosphatidylcholine alkyl-acyl 34:3	T2DM	rs13266634	8	118184783	SLC30A8	T	C	0.3029	0.243636	NP	NP	0.000829979	-9.88684	NP	NP
Phosphatidylcholine alkyl-acyl 34:3	T2DM	rs13293121	9	81881830	PSAT1(dist=936821), TLE4(dist=305048)	A	G	0.9424	0.927602	NP	NP	0.000378043	6.15326	NP	NP
Phosphatidylcholine alkyl-acyl 34:3	T2DM	rs1495130	3	23241009	ZNF385D(dist=1448193), UBE2E2(dist=3775)	C	G	0.9014	0.39233	NP	NP	0.000382697	6.32989	NP	NP
Phosphatidylcholine alkyl-acyl 34:3	T2DM	rs163184	11	2847069	KCNQ1	T	G	0.5294	-0.133333	NP	NP	0.000584806	-7.67001	NP	NP
Phosphatidylcholine alkyl-acyl 34:3	T2DM	rs2144908	20	42985717	HNF4A	A	G	0.1841	-0.316794	NP	NP	0.000334154	4.6867	NP	NP
Phosphatidylcholine alkyl-acyl 34:3	T2DM	rs2237892	11	2839751	KCNQ1	T	C	0.06	-1.53907	NP	NP	0.000691096	-7.32423	NP	NP
Phosphatidylcholine alkyl-acyl 34:3	T2DM	rs2261181	12	66212318	RPSAP52	T	C	0.089	-1.77074	NP	NP	0.000275355	5.77781	NP	NP
Phosphatidylcholine alkyl-acyl 34:3	T2DM	rs2290203	15	91512067	LOC100507118	A	G	0.2167	0.329268	NP	NP	0.000291967	5.50545	NP	NP
Phosphatidylcholine alkyl-acyl 34:3	T2DM	rs231361	11	2691500	KCNQ1OT1	A	G	0.2367	1.20833	NP	NP	0.000488167	7.67001	NP	NP
Phosphatidylcholine alkyl-acyl 34:3	T2DM	rs2383208	9	22132076	CDKN2B, AS1(dist=10983), DMRTA1(dist=314764)	A	G	0.8133	0.657825	NP	NP	0.00134378	10.8982	NP	NP
Phosphatidylcholine alkyl-acyl 34:3	T2DM	rs243018	2	60586707	FLJ30838(dist=1295806), MIR4432(dist=27790)	C	G	0.546	-1.5404	NP	NP	0.000316372	-8.22075	NP	NP
Phosphatidylcholine alkyl-acyl 34:3	T2DM	rs4237150	9	4290085	GLIS3	C	G	0.4132	-0.0990099	NP	NP	0.000281865	4.79579	NP	NP
Phosphatidylcholine alkyl-acyl 34:3	T2DM	rs4580722	4	6306144	WFS1(dist=1152), PPP2R2C(dist=16161)	A	C	0.5829	-0.235294	NP	NP	0.000424296	7.67001	NP	NP
Phosphatidylcholine alkyl-acyl 34:3	T2DM	rs4719433	7	15065003	DGKB(dist=183928), AGMO(dist=174940)	T	C	0.4626	-0.9	NP	NP	0.000383784	-5.50545	NP	NP
Phosphatidylcholine alkyl-acyl 34:3	T2DM	rs5015480	10	94465559	HHEX(dist=10151), EXOC6(dist=128911)	T	C	0.3967	-0.125	NP	NP	0.000878314	-9.14217	NP	NP
Phosphatidylcholine alkyl-acyl 34:3	T2DM	rs5215	11	17408630	KCNJ11	T	C	0.6369	2.19318	NP	NP	0.000399791	-9.2897	NP	NP
Phosphatidylcholine alkyl-acyl 34:3	T2DM	rs6103716	20	42999630	HNF4A	A	C	0.6914	-0.409722	NP	NP	0.000322944	-5.50545	NP	NP
Phosphatidylcholine alkyl-acyl 34:3	T2DM	rs6444187	3	186674138	ST6GAL1	C	G	0.4081	1.94313	NP	NP	0.000393307	-6.94261	NP	NP
Phosphatidylcholine alkyl-acyl 34:3	T2DM	rs6494307	15	62394690	C2CD4A(dist=31574), C2CD4B(dist=61047)	C	G	0.5565	-0.348259	NP	NP	0.000292779	4.79579	NP	NP
Phosphatidylcholine alkyl-acyl 34:3	T2DM	rs6813195	4	153520475	DKFZP434I0714(dist=60060), TMEM154(dist=26791)	T	C	0.2642	0.529801	NP	NP	0.000313621	-5.50545	NP	NP
Phosphatidylcholine alkyl-acyl 34:3	T2DM	rs6928012	6	20728513	CDKAL1	T	C	0.6146	0.651341	NP	NP	0.000329188	-8.22075	NP	NP
Phosphatidylcholine alkyl-acyl 34:3	T2DM	rs7178572	15	77747190	HMG20A	A	G	0.283	-1.63121	NP	NP	0.000435302	-6.22107	NP	NP
Phosphatidylcholine alkyl-acyl 34:3	T2DM	rs7501939	17	36101156	HNF1B	T	C	0.4095	-0.454902	NP	NP	0.000540926	5.77781	NP	NP
Phosphatidylcholine alkyl-acyl 34:3	T2DM	rs864745	7	28180556	JAZF1	T	C	0.5079	-0.710425	NP	NP	0.000469056	6.94261	NP	NP
Phosphatidylcholine alkyl-acyl 34:3	T2DM	rs896854	8	95960511	TP53INP1	T	C	0.5062	0.665414	NP	NP	0.000347538	5.50545	NP	NP
Phosphatidylcholine alkyl-acyl 36:2 (LC-MS)	T2DM	rs10440833	6	20688121	CDKAL1	A	T	0.279	0.671811	NP	NP	0.0013103	12.9216	NP	NP
Phosphatidylcholine alkyl-acyl 36:2 (LC-MS)	T2DM	rs10830962	11	92698427	FAT3(dist=68792), MTNR1B(dist=4362)	C	G	0.6473	1.09865	NP	NP	0.000388665	-6.22107	NP	NP
Phosphatidylcholine alkyl-acyl 36:2 (LC-MS)	T2DM	rs10842993	12	27964648	KLHL42(dist=8675), PTHLH(dist=146369)	A	G	0.2049	2.03065	NP	NP	0.000321092	-4.6867	NP	NP
Phosphatidylcholine alkyl-acyl 36:2 (LC-MS)	T2DM	rs11257655	10	12307894	CDC123(dist=15305), CAMK1D(dist=83689)	T	C	0.2043	-0.534591	NP	NP	0.000360805	6.94261	NP	NP
Phosphatidylcholine alkyl-acyl 36:2 (LC-MS)	T2DM	rs11708067	3	123065778	ADCY5	A	G	0.7294	1.51584	NP	NP	0.000325019	5.23007	NP	NP
Phosphatidylcholine alkyl-acyl 36:2 (LC-MS)	T2DM	rs1215468	13	80707429	NDFIP2(dist=577217), SPRY2(dist=202683)	A	G	0.7154	0.795775	NP	NP	0.000304833	4.14774	NP	NP
Phosphatidylcholine alkyl-acyl 36:2 (LC-MS)	T2DM	rs12571751	10	80942631	ZMIZ1	A	G	0.5183	-0.295918	NP	NP	0.00038775	9.2897	NP	NP
Phosphatidylcholine alkyl-acyl 36:2 (LC-MS)	T2DM	rs13266634	8	118184783	SLC30A8	T	C	0.3028	0.287273	NP	NP	0.000829979	-9.88684	NP	NP
Phosphatidylcholine alkyl-acyl 36:2 (LC-MS)	T2DM	rs13293121	9	81881830	PSAT1(dist=936821), TLE4(dist=305048)	A	G	0.942	2.41538	NP	NP	0.000378043	6.15326	NP	NP
Phosphatidylcholine alkyl-acyl 36:2 (LC-MS)	T2DM	rs1495130	3	23241009	ZNF385D(dist=1448193), UBE2E2(dist=3775)	C	G	0.9012	0.520349	NP	NP	0.000382697	6.32989	NP	NP
Phosphatidylcholine alkyl-acyl 36:2 (LC-MS)	T2DM	rs163184	11	2847069	KCNQ1	T	G	0.528	-1.11765	NP	NP	0.000584806	-7.67001	NP	NP
Phosphatidylcholine alkyl-acyl 36:2 (LC-MS)	T2DM	rs2144908	20	42985717	HNF4A	A	G	0.1835	-1.19231	NP	NP	0.000334154	4.6867	NP	NP
Phosphatidylcholine alkyl-acyl 36:2 (LC-MS)	T2DM	rs2237892	11	2839751	KCNQ1	T	C	0.06	-1.63495	NP	NP	0.000691096	-7.32423	NP	NP
Phosphatidylcholine alkyl-acyl 36:2 (LC-MS)	T2DM	rs2261181	12	66212318	RPSAP52	T	C	0.088	-1.80752	NP	NP	0.000275355	5.77781	NP	NP
Phosphatidylcholine alkyl-acyl 36:2 (LC-MS)	T2DM	rs2290203	15	91512067	LOC100507118	A	G	0.2167	0.326531	NP	NP	0.000291967	5.50545	NP	NP
Phosphatidylcholine alkyl-acyl 36:2 (LC-MS)	T2DM	rs231361	11	2691500	KCNQ1OT1	A	G	0.2344	0.162866	NP	NP	0.000488167	7.67001	NP	NP
Phosphatidylcholine alkyl-acyl 36:2 (LC-MS)	T2DM	rs2383208	9	22132076	CDKN2B, AS1(dist=10983), DMRTA1(dist=314764)	A	G	0.8128	-0.80429	NP	NP	0.00134378	10.8982	NP	NP
Phosphatidylcholine alkyl-acyl 36:2 (LC-MS)	T2DM	rs243018	2	60586707	FLJ30838(dist=1295806), MIR4432(dist=27790)	C	G	0.5459	-1.24365	NP	NP	0.000316372	-8.22075	NP	NP
Phosphatidylcholine alkyl-acyl 36:2 (LC-MS)	T2DM	rs4237150	9	4290085	GLIS3	C	G	0.4128	-0.995074	NP	NP	0.000281865	4.79579	NP	NP
Phosphatidylcholine alkyl-acyl 36:2 (LC-MS)	T2DM	rs4580722	4	6306144	WFS1(dist=1152), PPP2R2C(dist=16161)	A	C	0.5835	-0.356098	NP	NP	0.000424296	7.67001	NP	NP
Phosphatidylcholine alkyl-acyl 36:2 (LC-MS)	T2DM	rs4719433	7	15065003	DGKB(dist=183928), AGMO(dist=174940)	T	C	0.4626	-1.53	NP	NP	0.000383784	-5.50545	NP	NP
Phosphatidylcholine alkyl-acyl 36:2 (LC-MS)	T2DM	rs5015480	10	94465559	HHEX(dist=10151), EXOC6(dist=128911)	T	C	0.3966	0.589354	NP	NP	0.000878314	-9.14217	NP	NP
Phosphatidylcholine alkyl-acyl 36:2 (LC-MS)	T2DM	rs5215	11	17408630	KCNJ11	T	C	0.6365	1.85227	NP	NP	0.000399791	-9.2897	NP	NP
Phosphatidylcholine alkyl-acyl 36:2 (LC-MS)	T2DM	rs6103716	20	42999630	HNF4A	A	C	0.6905	0.708772	NP	NP	0.000322944	-5.50545	NP	NP
Phosphatidylcholine alkyl-acyl 36:2 (LC-MS)	T2DM	rs6444187	3	186674138	ST6GAL1	C	G	0.4075	1.66038	NP	NP	0.000393307	-6.94261	NP	NP
Phosphatidylcholine alkyl-acyl 36:2 (LC-MS)	T2DM	rs6494307	15	62394690	C2CD4A(dist=31574), C2CD4B(dist=61047)	C	G	0.5566	0.0854271	NP	NP	0.000292779	4.79579	NP	NP
Phosphatidylcholine alkyl-acyl 36:2 (LC-MS)	T2DM	rs6813195	4	153520475	DKFZP434I0714(dist=60060), TMEM154(dist=26791)	T	C	0.2653	-0.430976	NP	NP	0.000313621	-5.50545	NP	NP
Phosphatidylcholine alkyl-acyl 36:2 (LC-MS)	T2DM	rs6928012	6	20728513	CDKAL1	T	C	0.6138	0.192308	NP	NP	0.000329188	-8.22075	NP	NP
Phosphatidylcholine alkyl-acyl 36:2 (LC-MS)	T2DM	rs7178572	15	77747190	HMG20A	A	G	0.2828	-1.32517	NP	NP	0.000435302	-6.22107	NP	NP
Phosphatidylcholine alkyl-acyl 36:2 (LC-MS)	T2DM	rs7501939	17	36101156	HNF1B	T	C	0.4096	-0.316406	NP	NP	0.000540926	5.77781	NP	NP
Phosphatidylcholine alkyl-acyl 36:2 (LC-MS)	T2DM	rs864745	7	28180556	JAZF1	T	C	0.5083	0.787645	NP	NP	0.000469056	6.94261	NP	NP
Phosphatidylcholine alkyl-acyl 36:2 (LC-MS)	T2DM	rs896854	8	95960511	TP53INP1	T	C	0.5065	-0.271698	NP	NP	0.000347538	5.50545	NP	NP
Phosphatidylcholine alkyl-acyl 36:2 (Biocrates)	T2DM	rs10440833	6	20688121	CDKAL1	A	T	0.281	-0.607843	NP	NP	0.0013103	12.9216	NP	NP
Phosphatidylcholine alkyl-acyl 36:2 (Biocrates)	T2DM	rs10830962	11	92698427	FAT3(dist=68792), MTNR1B(dist=4362)	C	G	0.6126	-1.02	NP	NP	0.000388665	-6.22107	NP	NP
Phosphatidylcholine alkyl-acyl 36:2 (Biocrates)	T2DM	rs10842993	12	27964648	KLHL42(dist=8675), PTHLH(dist=146369)	A	G	0.2159	2.67797	NP	NP	0.000321092	-4.6867	NP	NP
Phosphatidylcholine alkyl-acyl 36:2 (Biocrates)	T2DM	rs11257655	10	12307894	CDC123(dist=15305), CAMK1D(dist=83689)	T	C	0.2098	0.310345	NP	NP	0.000360805	6.94261	NP	NP
Phosphatidylcholine alkyl-acyl 36:2 (Biocrates)	T2DM	rs11708067	3	123065778	ADCY5	A	G	0.7653	0.636364	NP	NP	0.000325019	5.23007	NP	NP
Phosphatidylcholine alkyl-acyl 36:2 (Biocrates)	T2DM	rs1215468	13	80707429	NDFIP2(dist=577217), SPRY2(dist=202683)	A	G	0.7244	-1.15686	NP	NP	0.000304833	4.14774	NP	NP
Phosphatidylcholine alkyl-acyl 36:2 (Biocrates)	T2DM	rs12571751	10	80942631	ZMIZ1	A	G	0.5215	-1.19565	NP	NP	0.00038775	9.2897	NP	NP
Phosphatidylcholine alkyl-acyl 36:2 (Biocrates)	T2DM	rs13266634	8	118184783	SLC30A8	T	C	0.3187	-0.306122	NP	NP	0.000829979	-9.88684	NP	NP
Phosphatidylcholine alkyl-acyl 36:2 (Biocrates)	T2DM	rs13293121	9	81881830	PSAT1(dist=936821), TLE4(dist=305048)	A	G	0.9419	1.41176	NP	NP	0.000378043	6.15326	NP	NP
Phosphatidylcholine alkyl-acyl 36:2 (Biocrates)	T2DM	rs1495130	3	23241009	ZNF385D(dist=1448193), UBE2E2(dist=3775)	C	G	0.9152	-1.93976	NP	NP	0.000382697	6.32989	NP	NP
Phosphatidylcholine alkyl-acyl 36:2 (Biocrates)	T2DM	rs163184	11	2847069	KCNQ1	T	G	0.5073	0.125	NP	NP	0.000584806	-7.67001	NP	NP
Phosphatidylcholine alkyl-acyl 36:2 (Biocrates)	T2DM	rs2144908	20	42985717	HNF4A	A	G	0.1871	-1.09836	NP	NP	0.000334154	4.6867	NP	NP
Phosphatidylcholine alkyl-acyl 36:2 (Biocrates)	T2DM	rs2237892	11	2839751	KCNQ1	T	C	0.0601	-0.15	NP	NP	0.000691096	-7.32423	NP	NP
Phosphatidylcholine alkyl-acyl 36:2 (Biocrates)	T2DM	rs2261181	12	66212318	RPSAP52	T	C	0.1008	0.727273	NP	NP	0.000275355	5.77781	NP	NP
Phosphatidylcholine alkyl-acyl 36:2 (Biocrates)	T2DM	rs2290203	15	91512067	LOC100507118	A	G	0.2116	0.315789	NP	NP	0.000291967	5.50545	NP	NP
Phosphatidylcholine alkyl-acyl 36:2 (Biocrates)	T2DM	rs231361	11	2691500	KCNQ1OT1	A	G	0.2432	1.75926	NP	NP	0.000488167	7.67001	NP	NP
Phosphatidylcholine alkyl-acyl 36:2 (Biocrates)	T2DM	rs2383208	9	22132076	CDKN2B, AS1(dist=10983), DMRTA1(dist=314764)	A	G	0.8314	-0.857143	NP	NP	0.00134378	10.8982	NP	NP
Phosphatidylcholine alkyl-acyl 36:2 (Biocrates)	T2DM	rs243018	2	60586707	FLJ30838(dist=1295806), MIR4432(dist=27790)	C	G	0.522	1.17391	NP	NP	0.000316372	-8.22075	NP	NP
Phosphatidylcholine alkyl-acyl 36:2 (Biocrates)	T2DM	rs4237150	9	4290085	GLIS3	C	G	0.4179	-0.978261	NP	NP	0.000281865	4.79579	NP	NP
Phosphatidylcholine alkyl-acyl 36:2 (Biocrates)	T2DM	rs4580722	4	6306144	WFS1(dist=1152), PPP2R2C(dist=16161)	A	C	0.577	-1.42857	NP	NP	0.000424296	7.67001	NP	NP
Phosphatidylcholine alkyl-acyl 36:2 (Biocrates)	T2DM	rs4719433	7	15065003	DGKB(dist=183928), AGMO(dist=174940)	T	C	0.4641	-1.45652	NP	NP	0.000383784	-5.50545	NP	NP
Phosphatidylcholine alkyl-acyl 36:2 (Biocrates)	T2DM	rs5015480	10	94465559	HHEX(dist=10151), EXOC6(dist=128911)	T	C	0.4146	1.04348	NP	NP	0.000878314	-9.14217	NP	NP
Phosphatidylcholine alkyl-acyl 36:2 (Biocrates)	T2DM	rs5215	11	17408630	KCNJ11	T	C	0.6357	-0.744681	NP	NP	0.000399791	-9.2897	NP	NP
Phosphatidylcholine alkyl-acyl 36:2 (Biocrates)	T2DM	rs6103716	20	42999630	HNF4A	A	C	0.6667	0.938776	NP	NP	0.000322944	-5.50545	NP	NP
Phosphatidylcholine alkyl-acyl 36:2 (Biocrates)	T2DM	rs6444187	3	186674138	ST6GAL1	C	G	0.43	-0.4375	NP	NP	0.000393307	-6.94261	NP	NP
Phosphatidylcholine alkyl-acyl 36:2 (Biocrates)	T2DM	rs6494307	15	62394690	C2CD4A(dist=31574), C2CD4B(dist=61047)	C	G	0.5663	-0.23913	NP	NP	0.000292779	4.79579	NP	NP
Phosphatidylcholine alkyl-acyl 36:2 (Biocrates)	T2DM	rs6813195	4	153520475	DKFZP434I0714(dist=60060), TMEM154(dist=26791)	T	C	0.2702	-0.277778	NP	NP	0.000313621	-5.50545	NP	NP
Phosphatidylcholine alkyl-acyl 36:2 (Biocrates)	T2DM	rs6928012	6	20728513	CDKAL1	T	C	0.6009	2.04255	NP	NP	0.000329188	-8.22075	NP	NP
Phosphatidylcholine alkyl-acyl 36:2 (Biocrates)	T2DM	rs7178572	15	77747190	HMG20A	A	G	0.2952	-0.469388	NP	NP	0.000435302	-6.22107	NP	NP
Phosphatidylcholine alkyl-acyl 36:2 (Biocrates)	T2DM	rs7501939	17	36101156	HNF1B	T	C	0.4	1.01852	NP	NP	0.000540926	5.77781	NP	NP
Phosphatidylcholine alkyl-acyl 36:2 (Biocrates)	T2DM	rs864745	7	28180556	JAZF1	T	C	0.5204	0.0869565	NP	NP	0.000469056	6.94261	NP	NP
Phosphatidylcholine alkyl-acyl 36:2 (Biocrates)	T2DM	rs896854	8	95960511	TP53INP1	T	C	0.5074	-2.15217	NP	NP	0.000347538	5.50545	NP	NP
Phosphatidylcholine alkyl-acyl 36:3	T2DM	rs10440833	6	20688121	CDKAL1	A	T	0.279	0.310924	NP	NP	0.0013103	12.9216	NP	NP
Phosphatidylcholine alkyl-acyl 36:3	T2DM	rs10830962	11	92698427	FAT3(dist=68792), MTNR1B(dist=4362)	C	G	0.648	0.234783	NP	NP	0.000388665	-6.22107	NP	NP
Phosphatidylcholine alkyl-acyl 36:3	T2DM	rs10842993	12	27964648	KLHL42(dist=8675), PTHLH(dist=146369)	A	G	0.2053	1.53232	NP	NP	0.000321092	-4.6867	NP	NP
Phosphatidylcholine alkyl-acyl 36:3	T2DM	rs11257655	10	12307894	CDC123(dist=15305), CAMK1D(dist=83689)	T	C	0.2045	-1.2254	NP	NP	0.000360805	6.94261	NP	NP
Phosphatidylcholine alkyl-acyl 36:3	T2DM	rs11708067	3	123065778	ADCY5	A	G	0.7303	0.910714	NP	NP	0.000325019	5.23007	NP	NP
Phosphatidylcholine alkyl-acyl 36:3	T2DM	rs1215468	13	80707429	NDFIP2(dist=577217), SPRY2(dist=202683)	A	G	0.7153	0.658537	NP	NP	0.000304833	4.14774	NP	NP
Phosphatidylcholine alkyl-acyl 36:3	T2DM	rs12571751	10	80942631	ZMIZ1	A	G	0.518	0.263959	NP	NP	0.00038775	9.2897	NP	NP
Phosphatidylcholine alkyl-acyl 36:3	T2DM	rs13266634	8	118184783	SLC30A8	T	C	0.303	0.129032	NP	NP	0.000829979	-9.88684	NP	NP
Phosphatidylcholine alkyl-acyl 36:3	T2DM	rs13293121	9	81881830	PSAT1(dist=936821), TLE4(dist=305048)	A	G	0.9429	0.822072	NP	NP	0.000378043	6.15326	NP	NP
Phosphatidylcholine alkyl-acyl 36:3	T2DM	rs1495130	3	23241009	ZNF385D(dist=1448193), UBE2E2(dist=3775)	C	G	0.9015	0.434524	NP	NP	0.000382697	6.32989	NP	NP
Phosphatidylcholine alkyl-acyl 36:3	T2DM	rs163184	11	2847069	KCNQ1	T	G	0.5287	-0.301158	NP	NP	0.000584806	-7.67001	NP	NP
Phosphatidylcholine alkyl-acyl 36:3	T2DM	rs2144908	20	42985717	HNF4A	A	G	0.1847	-0.706107	NP	NP	0.000334154	4.6867	NP	NP
Phosphatidylcholine alkyl-acyl 36:3	T2DM	rs2237892	11	2839751	KCNQ1	T	C	0.06	-1.10974	NP	NP	0.000691096	-7.32423	NP	NP
Phosphatidylcholine alkyl-acyl 36:3	T2DM	rs2261181	12	66212318	RPSAP52	T	C	0.0885	-1.84599	NP	NP	0.000275355	5.77781	NP	NP
Phosphatidylcholine alkyl-acyl 36:3	T2DM	rs2290203	15	91512067	LOC100507118	A	G	0.217	-0.255061	NP	NP	0.000291967	5.50545	NP	NP
Phosphatidylcholine alkyl-acyl 36:3	T2DM	rs231361	11	2691500	KCNQ1OT1	A	G	0.236	1	NP	NP	0.000488167	7.67001	NP	NP
Phosphatidylcholine alkyl-acyl 36:3	T2DM	rs2383208	9	22132076	CDKN2B, AS1(dist=10983), DMRTA1(dist=314764)	A	G	0.8135	-0.262087	NP	NP	0.00134378	10.8982	NP	NP
Phosphatidylcholine alkyl-acyl 36:3	T2DM	rs243018	2	60586707	FLJ30838(dist=1295806), MIR4432(dist=27790)	C	G	0.5462	-0.737374	NP	NP	0.000316372	-8.22075	NP	NP
Phosphatidylcholine alkyl-acyl 36:3	T2DM	rs4237150	9	4290085	GLIS3	C	G	0.4128	-1.11707	NP	NP	0.000281865	4.79579	NP	NP
Phosphatidylcholine alkyl-acyl 36:3	T2DM	rs4580722	4	6306144	WFS1(dist=1152), PPP2R2C(dist=16161)	A	C	0.5836	-0.15122	NP	NP	0.000424296	7.67001	NP	NP
Phosphatidylcholine alkyl-acyl 36:3	T2DM	rs4719433	7	15065003	DGKB(dist=183928), AGMO(dist=174940)	T	C	0.4626	-1.81592	NP	NP	0.000383784	-5.50545	NP	NP
Phosphatidylcholine alkyl-acyl 36:3	T2DM	rs5015480	10	94465559	HHEX(dist=10151), EXOC6(dist=128911)	T	C	0.3963	-0.784906	NP	NP	0.000878314	-9.14217	NP	NP
Phosphatidylcholine alkyl-acyl 36:3	T2DM	rs5215	11	17408630	KCNJ11	T	C	0.6368	1.10075	NP	NP	0.000399791	-9.2897	NP	NP
Phosphatidylcholine alkyl-acyl 36:3	T2DM	rs6103716	20	42999630	HNF4A	A	C	0.6907	-0.274306	NP	NP	0.000322944	-5.50545	NP	NP
Phosphatidylcholine alkyl-acyl 36:3	T2DM	rs6444187	3	186674138	ST6GAL1	C	G	0.4074	1.65094	NP	NP	0.000393307	-6.94261	NP	NP
Phosphatidylcholine alkyl-acyl 36:3	T2DM	rs6494307	15	62394690	C2CD4A(dist=31574), C2CD4B(dist=61047)	C	G	0.5561	-0.154229	NP	NP	0.000292779	4.79579	NP	NP
Phosphatidylcholine alkyl-acyl 36:3	T2DM	rs6813195	4	153520475	DKFZP434I0714(dist=60060), TMEM154(dist=26791)	T	C	0.2642	-0.650327	NP	NP	0.000313621	-5.50545	NP	NP
Phosphatidylcholine alkyl-acyl 36:3	T2DM	rs6928012	6	20728513	CDKAL1	T	C	0.6139	0.861004	NP	NP	0.000329188	-8.22075	NP	NP
Phosphatidylcholine alkyl-acyl 36:3	T2DM	rs7178572	15	77747190	HMG20A	A	G	0.283	-0.958188	NP	NP	0.000435302	-6.22107	NP	NP
Phosphatidylcholine alkyl-acyl 36:3	T2DM	rs7501939	17	36101156	HNF1B	T	C	0.4094	-1.10811	NP	NP	0.000540926	5.77781	NP	NP
Phosphatidylcholine alkyl-acyl 36:3	T2DM	rs864745	7	28180556	JAZF1	T	C	0.5081	0.138462	NP	NP	0.000469056	6.94261	NP	NP
Phosphatidylcholine alkyl-acyl 36:3	T2DM	rs896854	8	95960511	TP53INP1	T	C	0.5065	0.0298507	NP	NP	0.000347538	5.50545	NP	NP
Phosphatidylcholine alkyl-acyl 40:3	T2DM	rs10440833	6	20688121	CDKAL1	A	T	0.2824	-0.306122	NP	NP	0.0013103	12.9216	NP	NP
Phosphatidylcholine alkyl-acyl 40:3	T2DM	rs10830962	11	92698427	FAT3(dist=68792), MTNR1B(dist=4362)	C	G	0.6115	-0.395833	NP	NP	0.000388665	-6.22107	NP	NP
Phosphatidylcholine alkyl-acyl 40:3	T2DM	rs10842993	12	27964648	KLHL42(dist=8675), PTHLH(dist=146369)	A	G	0.2168	2.125	NP	NP	0.000321092	-4.6867	NP	NP
Phosphatidylcholine alkyl-acyl 40:3	T2DM	rs11257655	10	12307894	CDC123(dist=15305), CAMK1D(dist=83689)	T	C	0.2113	0.6	NP	NP	0.000360805	6.94261	NP	NP
Phosphatidylcholine alkyl-acyl 40:3	T2DM	rs11708067	3	123065778	ADCY5	A	G	0.7665	0.0188679	NP	NP	0.000325019	5.23007	NP	NP
Phosphatidylcholine alkyl-acyl 40:3	T2DM	rs1215468	13	80707429	NDFIP2(dist=577217), SPRY2(dist=202683)	A	G	0.7274	-1.40816	NP	NP	0.000304833	4.14774	NP	NP
Phosphatidylcholine alkyl-acyl 40:3	T2DM	rs12571751	10	80942631	ZMIZ1	A	G	0.5241	-2.18182	NP	NP	0.00038775	9.2897	NP	NP
Phosphatidylcholine alkyl-acyl 40:3	T2DM	rs13266634	8	118184783	SLC30A8	T	C	0.3182	-0.744681	NP	NP	0.000829979	-9.88684	NP	NP
Phosphatidylcholine alkyl-acyl 40:3	T2DM	rs13293121	9	81881830	PSAT1(dist=936821), TLE4(dist=305048)	A	G	0.941	1.19388	NP	NP	0.000378043	6.15326	NP	NP
Phosphatidylcholine alkyl-acyl 40:3	T2DM	rs1495130	3	23241009	ZNF385D(dist=1448193), UBE2E2(dist=3775)	C	G	0.9143	-0.493671	NP	NP	0.000382697	6.32989	NP	NP
Phosphatidylcholine alkyl-acyl 40:3	T2DM	rs163184	11	2847069	KCNQ1	T	G	0.5079	0.0851064	NP	NP	0.000584806	-7.67001	NP	NP
Phosphatidylcholine alkyl-acyl 40:3	T2DM	rs2144908	20	42985717	HNF4A	A	G	0.1864	-1.32759	NP	NP	0.000334154	4.6867	NP	NP
Phosphatidylcholine alkyl-acyl 40:3	T2DM	rs2237892	11	2839751	KCNQ1	T	C	0.0611	0.0625	NP	NP	0.000691096	-7.32423	NP	NP
Phosphatidylcholine alkyl-acyl 40:3	T2DM	rs2261181	12	66212318	RPSAP52	T	C	0.1025	0.726027	NP	NP	0.000275355	5.77781	NP	NP
Phosphatidylcholine alkyl-acyl 40:3	T2DM	rs2290203	15	91512067	LOC100507118	A	G	0.2117	0.259259	NP	NP	0.000291967	5.50545	NP	NP
Phosphatidylcholine alkyl-acyl 40:3	T2DM	rs231361	11	2691500	KCNQ1OT1	A	G	0.2443	0.653846	NP	NP	0.000488167	7.67001	NP	NP
Phosphatidylcholine alkyl-acyl 40:3	T2DM	rs2383208	9	22132076	CDKN2B, AS1(dist=10983), DMRTA1(dist=314764)	A	G	0.83	-0.533333	NP	NP	0.00134378	10.8982	NP	NP
Phosphatidylcholine alkyl-acyl 40:3	T2DM	rs243018	2	60586707	FLJ30838(dist=1295806), MIR4432(dist=27790)	C	G	0.5224	1.81818	NP	NP	0.000316372	-8.22075	NP	NP
Phosphatidylcholine alkyl-acyl 40:3	T2DM	rs4237150	9	4290085	GLIS3	C	G	0.4197	-1	NP	NP	0.000281865	4.79579	NP	NP
Phosphatidylcholine alkyl-acyl 40:3	T2DM	rs4580722	4	6306144	WFS1(dist=1152), PPP2R2C(dist=16161)	A	C	0.5783	-0.531915	NP	NP	0.000424296	7.67001	NP	NP
Phosphatidylcholine alkyl-acyl 40:3	T2DM	rs4719433	7	15065003	DGKB(dist=183928), AGMO(dist=174940)	T	C	0.4634	-0.977273	NP	NP	0.000383784	-5.50545	NP	NP
Phosphatidylcholine alkyl-acyl 40:3	T2DM	rs5015480	10	94465559	HHEX(dist=10151), EXOC6(dist=128911)	T	C	0.4131	-0.227273	NP	NP	0.000878314	-9.14217	NP	NP
Phosphatidylcholine alkyl-acyl 40:3	T2DM	rs5215	11	17408630	KCNJ11	T	C	0.6351	0.822222	NP	NP	0.000399791	-9.2897	NP	NP
Phosphatidylcholine alkyl-acyl 40:3	T2DM	rs6103716	20	42999630	HNF4A	A	C	0.6662	0.702128	NP	NP	0.000322944	-5.50545	NP	NP
Phosphatidylcholine alkyl-acyl 40:3	T2DM	rs6444187	3	186674138	ST6GAL1	C	G	0.4278	0.630435	NP	NP	0.000393307	-6.94261	NP	NP
Phosphatidylcholine alkyl-acyl 40:3	T2DM	rs6494307	15	62394690	C2CD4A(dist=31574), C2CD4B(dist=61047)	C	G	0.5665	0.318182	NP	NP	0.000292779	4.79579	NP	NP
Phosphatidylcholine alkyl-acyl 40:3	T2DM	rs6813195	4	153520475	DKFZP434I0714(dist=60060), TMEM154(dist=26791)	T	C	0.274	0.153846	NP	NP	0.000313621	-5.50545	NP	NP
Phosphatidylcholine alkyl-acyl 40:3	T2DM	rs6928012	6	20728513	CDKAL1	T	C	0.6015	2.66667	NP	NP	0.000329188	-8.22075	NP	NP
Phosphatidylcholine alkyl-acyl 40:3	T2DM	rs7178572	15	77747190	HMG20A	A	G	0.2968	-0.106383	NP	NP	0.000435302	-6.22107	NP	NP
Phosphatidylcholine alkyl-acyl 40:3	T2DM	rs7501939	17	36101156	HNF1B	T	C	0.4015	0.0181818	NP	NP	0.000540926	5.77781	NP	NP
Phosphatidylcholine alkyl-acyl 40:3	T2DM	rs864745	7	28180556	JAZF1	T	C	0.5212	-1.86364	NP	NP	0.000469056	6.94261	NP	NP
Phosphatidylcholine alkyl-acyl 40:3	T2DM	rs896854	8	95960511	TP53INP1	T	C	0.5092	-1.84091	NP	NP	0.000347538	5.50545	NP	NP
Phosphatidylcholine alkyl-acyl 42:3	T2DM	rs10440833	6	20688121	CDKAL1	A	T	0.2813	-0.313725	NP	NP	0.0013103	12.9216	NP	NP
Phosphatidylcholine alkyl-acyl 42:3	T2DM	rs10830962	11	92698427	FAT3(dist=68792), MTNR1B(dist=4362)	C	G	0.6111	-0.64	NP	NP	0.000388665	-6.22107	NP	NP
Phosphatidylcholine alkyl-acyl 42:3	T2DM	rs10842993	12	27964648	KLHL42(dist=8675), PTHLH(dist=146369)	A	G	0.2163	1.67241	NP	NP	0.000321092	-4.6867	NP	NP
Phosphatidylcholine alkyl-acyl 42:3	T2DM	rs11257655	10	12307894	CDC123(dist=15305), CAMK1D(dist=83689)	T	C	0.2098	1.72414	NP	NP	0.000360805	6.94261	NP	NP
Phosphatidylcholine alkyl-acyl 42:3	T2DM	rs11708067	3	123065778	ADCY5	A	G	0.7671	1.01818	NP	NP	0.000325019	5.23007	NP	NP
Phosphatidylcholine alkyl-acyl 42:3	T2DM	rs1215468	13	80707429	NDFIP2(dist=577217), SPRY2(dist=202683)	A	G	0.7249	-2.60784	NP	NP	0.000304833	4.14774	NP	NP
Phosphatidylcholine alkyl-acyl 42:3	T2DM	rs12571751	10	80942631	ZMIZ1	A	G	0.5228	-2.21739	NP	NP	0.00038775	9.2897	NP	NP
Phosphatidylcholine alkyl-acyl 42:3	T2DM	rs13266634	8	118184783	SLC30A8	T	C	0.3185	0.204082	NP	NP	0.000829979	-9.88684	NP	NP
Phosphatidylcholine alkyl-acyl 42:3	T2DM	rs13293121	9	81881830	PSAT1(dist=936821), TLE4(dist=305048)	A	G	0.9416	0.656863	NP	NP	0.000378043	6.15326	NP	NP
Phosphatidylcholine alkyl-acyl 42:3	T2DM	rs1495130	3	23241009	ZNF385D(dist=1448193), UBE2E2(dist=3775)	C	G	0.9152	-1.27711	NP	NP	0.000382697	6.32989	NP	NP
Phosphatidylcholine alkyl-acyl 42:3	T2DM	rs163184	11	2847069	KCNQ1	T	G	0.5074	-0.333333	NP	NP	0.000584806	-7.67001	NP	NP
Phosphatidylcholine alkyl-acyl 42:3	T2DM	rs2144908	20	42985717	HNF4A	A	G	0.1859	-0.196721	NP	NP	0.000334154	4.6867	NP	NP
Phosphatidylcholine alkyl-acyl 42:3	T2DM	rs2237892	11	2839751	KCNQ1	T	C	0.0607	0.73	NP	NP	0.000691096	-7.32423	NP	NP
Phosphatidylcholine alkyl-acyl 42:3	T2DM	rs2261181	12	66212318	RPSAP52	T	C	0.1005	2.44156	NP	NP	0.000275355	5.77781	NP	NP
Phosphatidylcholine alkyl-acyl 42:3	T2DM	rs2290203	15	91512067	LOC100507118	A	G	0.2115	-0.122807	NP	NP	0.000291967	5.50545	NP	NP
Phosphatidylcholine alkyl-acyl 42:3	T2DM	rs231361	11	2691500	KCNQ1OT1	A	G	0.2439	0.545455	NP	NP	0.000488167	7.67001	NP	NP
Phosphatidylcholine alkyl-acyl 42:3	T2DM	rs2383208	9	22132076	CDKN2B, AS1(dist=10983), DMRTA1(dist=314764)	A	G	0.8304	-0.0634921	NP	NP	0.00134378	10.8982	NP	NP
Phosphatidylcholine alkyl-acyl 42:3	T2DM	rs243018	2	60586707	FLJ30838(dist=1295806), MIR4432(dist=27790)	C	G	0.5222	1.58696	NP	NP	0.000316372	-8.22075	NP	NP
Phosphatidylcholine alkyl-acyl 42:3	T2DM	rs4237150	9	4290085	GLIS3	C	G	0.4193	-1.30435	NP	NP	0.000281865	4.79579	NP	NP
Phosphatidylcholine alkyl-acyl 42:3	T2DM	rs4580722	4	6306144	WFS1(dist=1152), PPP2R2C(dist=16161)	A	C	0.5779	-0.632653	NP	NP	0.000424296	7.67001	NP	NP
Phosphatidylcholine alkyl-acyl 42:3	T2DM	rs4719433	7	15065003	DGKB(dist=183928), AGMO(dist=174940)	T	C	0.4637	-0.652174	NP	NP	0.000383784	-5.50545	NP	NP
Phosphatidylcholine alkyl-acyl 42:3	T2DM	rs5015480	10	94465559	HHEX(dist=10151), EXOC6(dist=128911)	T	C	0.4144	0.0434783	NP	NP	0.000878314	-9.14217	NP	NP
Phosphatidylcholine alkyl-acyl 42:3	T2DM	rs5215	11	17408630	KCNJ11	T	C	0.6357	2.02128	NP	NP	0.000399791	-9.2897	NP	NP
Phosphatidylcholine alkyl-acyl 42:3	T2DM	rs6103716	20	42999630	HNF4A	A	C	0.6668	0.346939	NP	NP	0.000322944	-5.50545	NP	NP
Phosphatidylcholine alkyl-acyl 42:3	T2DM	rs6444187	3	186674138	ST6GAL1	C	G	0.4302	-1.29167	NP	NP	0.000393307	-6.94261	NP	NP
Phosphatidylcholine alkyl-acyl 42:3	T2DM	rs6494307	15	62394690	C2CD4A(dist=31574), C2CD4B(dist=61047)	C	G	0.5675	-0.826087	NP	NP	0.000292779	4.79579	NP	NP
Phosphatidylcholine alkyl-acyl 42:3	T2DM	rs6813195	4	153520475	DKFZP434I0714(dist=60060), TMEM154(dist=26791)	T	C	0.2716	-0.648148	NP	NP	0.000313621	-5.50545	NP	NP
Phosphatidylcholine alkyl-acyl 42:3	T2DM	rs6928012	6	20728513	CDKAL1	T	C	0.6003	2.2766	NP	NP	0.000329188	-8.22075	NP	NP
Phosphatidylcholine alkyl-acyl 42:3	T2DM	rs7178572	15	77747190	HMG20A	A	G	0.2963	0.0612245	NP	NP	0.000435302	-6.22107	NP	NP
Phosphatidylcholine alkyl-acyl 42:3	T2DM	rs7501939	17	36101156	HNF1B	T	C	0.3999	-0.339286	NP	NP	0.000540926	5.77781	NP	NP
Phosphatidylcholine alkyl-acyl 42:3	T2DM	rs864745	7	28180556	JAZF1	T	C	0.5195	-1.23913	NP	NP	0.000469056	6.94261	NP	NP
Phosphatidylcholine alkyl-acyl 42:4	T2DM	rs10440833	6	20688121	CDKAL1	A	T	0.2813	-1.34694	NP	NP	0.0013103	12.9216	NP	NP
Phosphatidylcholine alkyl-acyl 42:4	T2DM	rs10830962	11	92698427	FAT3(dist=68792), MTNR1B(dist=4362)	C	G	0.612	-1.47917	NP	NP	0.000388665	-6.22107	NP	NP
Phosphatidylcholine alkyl-acyl 42:4	T2DM	rs10842993	12	27964648	KLHL42(dist=8675), PTHLH(dist=146369)	A	G	0.2159	1.71429	NP	NP	0.000321092	-4.6867	NP	NP
Phosphatidylcholine alkyl-acyl 42:4	T2DM	rs11257655	10	12307894	CDC123(dist=15305), CAMK1D(dist=83689)	T	C	0.2094	1.01786	NP	NP	0.000360805	6.94261	NP	NP
Phosphatidylcholine alkyl-acyl 42:4	T2DM	rs11708067	3	123065778	ADCY5	A	G	0.7651	-0.0377358	NP	NP	0.000325019	5.23007	NP	NP
Phosphatidylcholine alkyl-acyl 42:4	T2DM	rs1215468	13	80707429	NDFIP2(dist=577217), SPRY2(dist=202683)	A	G	0.7245	-0.84	NP	NP	0.000304833	4.14774	NP	NP
Phosphatidylcholine alkyl-acyl 42:4	T2DM	rs12571751	10	80942631	ZMIZ1	A	G	0.5232	-1.8	NP	NP	0.00038775	9.2897	NP	NP
Phosphatidylcholine alkyl-acyl 42:4	T2DM	rs13266634	8	118184783	SLC30A8	T	C	0.3173	-0.75	NP	NP	0.000829979	-9.88684	NP	NP
Phosphatidylcholine alkyl-acyl 42:4	T2DM	rs13293121	9	81881830	PSAT1(dist=936821), TLE4(dist=305048)	A	G	0.9408	0.204082	NP	NP	0.000378043	6.15326	NP	NP
Phosphatidylcholine alkyl-acyl 42:4	T2DM	rs1495130	3	23241009	ZNF385D(dist=1448193), UBE2E2(dist=3775)	C	G	0.9156	-0.7875	NP	NP	0.000382697	6.32989	NP	NP
Phosphatidylcholine alkyl-acyl 42:4	T2DM	rs163184	11	2847069	KCNQ1	T	G	0.5069	-0.23913	NP	NP	0.000584806	-7.67001	NP	NP
Phosphatidylcholine alkyl-acyl 42:4	T2DM	rs2144908	20	42985717	HNF4A	A	G	0.1862	-0.779661	NP	NP	0.000334154	4.6867	NP	NP
Phosphatidylcholine alkyl-acyl 42:4	T2DM	rs2237892	11	2839751	KCNQ1	T	C	0.0599	1.05155	NP	NP	0.000691096	-7.32423	NP	NP
Phosphatidylcholine alkyl-acyl 42:4	T2DM	rs2261181	12	66212318	RPSAP52	T	C	0.0987	-0.146667	NP	NP	0.000275355	5.77781	NP	NP
Phosphatidylcholine alkyl-acyl 42:4	T2DM	rs2290203	15	91512067	LOC100507118	A	G	0.2116	1.03636	NP	NP	0.000291967	5.50545	NP	NP
Phosphatidylcholine alkyl-acyl 42:4	T2DM	rs231361	11	2691500	KCNQ1OT1	A	G	0.2454	1.39623	NP	NP	0.000488167	7.67001	NP	NP
Phosphatidylcholine alkyl-acyl 42:4	T2DM	rs2383208	9	22132076	CDKN2B, AS1(dist=10983), DMRTA1(dist=314764)	A	G	0.8305	-0.967213	NP	NP	0.00134378	10.8982	NP	NP
Phosphatidylcholine alkyl-acyl 42:4	T2DM	rs243018	2	60586707	FLJ30838(dist=1295806), MIR4432(dist=27790)	C	G	0.5203	2.4	NP	NP	0.000316372	-8.22075	NP	NP
Phosphatidylcholine alkyl-acyl 42:4	T2DM	rs4237150	9	4290085	GLIS3	C	G	0.4194	-1.33333	NP	NP	0.000281865	4.79579	NP	NP
Phosphatidylcholine alkyl-acyl 42:4	T2DM	rs4580722	4	6306144	WFS1(dist=1152), PPP2R2C(dist=16161)	A	C	0.5768	-0.297872	NP	NP	0.000424296	7.67001	NP	NP
Phosphatidylcholine alkyl-acyl 42:4	T2DM	rs4719433	7	15065003	DGKB(dist=183928), AGMO(dist=174940)	T	C	0.4634	-2.02222	NP	NP	0.000383784	-5.50545	NP	NP
Phosphatidylcholine alkyl-acyl 42:4	T2DM	rs5015480	10	94465559	HHEX(dist=10151), EXOC6(dist=128911)	T	C	0.4132	-0.311111	NP	NP	0.000878314	-9.14217	NP	NP
Phosphatidylcholine alkyl-acyl 42:4	T2DM	rs5215	11	17408630	KCNJ11	T	C	0.6345	1.82609	NP	NP	0.000399791	-9.2897	NP	NP
Phosphatidylcholine alkyl-acyl 42:4	T2DM	rs6103716	20	42999630	HNF4A	A	C	0.6671	-0.659574	NP	NP	0.000322944	-5.50545	NP	NP
Phosphatidylcholine alkyl-acyl 42:4	T2DM	rs6444187	3	186674138	ST6GAL1	C	G	0.43	-0.456522	NP	NP	0.000393307	-6.94261	NP	NP
Phosphatidylcholine alkyl-acyl 42:4	T2DM	rs6494307	15	62394690	C2CD4A(dist=31574), C2CD4B(dist=61047)	C	G	0.5687	-0.155556	NP	NP	0.000292779	4.79579	NP	NP
Phosphatidylcholine alkyl-acyl 42:4	T2DM	rs6813195	4	153520475	DKFZP434I0714(dist=60060), TMEM154(dist=26791)	T	C	0.2719	0.730769	NP	NP	0.000313621	-5.50545	NP	NP
Phosphatidylcholine alkyl-acyl 42:4	T2DM	rs6928012	6	20728513	CDKAL1	T	C	0.6008	2.73333	NP	NP	0.000329188	-8.22075	NP	NP
Phosphatidylcholine alkyl-acyl 42:4	T2DM	rs7178572	15	77747190	HMG20A	A	G	0.2949	0.604167	NP	NP	0.000435302	-6.22107	NP	NP
Phosphatidylcholine alkyl-acyl 42:4	T2DM	rs7501939	17	36101156	HNF1B	T	C	0.4	-0.849057	NP	NP	0.000540926	5.77781	NP	NP
Phosphatidylcholine alkyl-acyl 42:4	T2DM	rs864745	7	28180556	JAZF1	T	C	0.5203	-1.86364	NP	NP	0.000469056	6.94261	NP	NP
Phosphatidylcholine alkyl-acyl 42:4	T2DM	rs896854	8	95960511	TP53INP1	T	C	0.506	-1.71111	NP	NP	0.000347538	5.50545	NP	NP
Phosphatidylcholine alkyl-acyl 42:5	T2DM	rs10440833	6	20688121	CDKAL1	A	T	0.2782	-1.8913	NP	NP	0.0013103	12.9216	NP	NP
Phosphatidylcholine alkyl-acyl 42:5	T2DM	rs10830962	11	92698427	FAT3(dist=68792), MTNR1B(dist=4362)	C	G	0.6148	-1.68889	NP	NP	0.000388665	-6.22107	NP	NP
Phosphatidylcholine alkyl-acyl 42:5	T2DM	rs10842993	12	27964648	KLHL42(dist=8675), PTHLH(dist=146369)	A	G	0.2109	1.58491	NP	NP	0.000321092	-4.6867	NP	NP
Phosphatidylcholine alkyl-acyl 42:5	T2DM	rs11257655	10	12307894	CDC123(dist=15305), CAMK1D(dist=83689)	T	C	0.2103	0.557692	NP	NP	0.000360805	6.94261	NP	NP
Phosphatidylcholine alkyl-acyl 42:5	T2DM	rs11708067	3	123065778	ADCY5	A	G	0.7603	-0.428571	NP	NP	0.000325019	5.23007	NP	NP
Phosphatidylcholine alkyl-acyl 42:5	T2DM	rs1215468	13	80707429	NDFIP2(dist=577217), SPRY2(dist=202683)	A	G	0.7223	-0.869565	NP	NP	0.000304833	4.14774	NP	NP
Phosphatidylcholine alkyl-acyl 42:5	T2DM	rs12571751	10	80942631	ZMIZ1	A	G	0.5256	-1.92857	NP	NP	0.00038775	9.2897	NP	NP
Phosphatidylcholine alkyl-acyl 42:5	T2DM	rs13266634	8	118184783	SLC30A8	T	C	0.3109	-0.133333	NP	NP	0.000829979	-9.88684	NP	NP
Phosphatidylcholine alkyl-acyl 42:5	T2DM	rs13293121	9	81881830	PSAT1(dist=936821), TLE4(dist=305048)	A	G	0.9397	0.461538	NP	NP	0.000378043	6.15326	NP	NP
Phosphatidylcholine alkyl-acyl 42:5	T2DM	rs1495130	3	23241009	ZNF385D(dist=1448193), UBE2E2(dist=3775)	C	G	0.915	-0.08	NP	NP	0.000382697	6.32989	NP	NP
Phosphatidylcholine alkyl-acyl 42:5	T2DM	rs163184	11	2847069	KCNQ1	T	G	0.5102	0.340909	NP	NP	0.000584806	-7.67001	NP	NP
Phosphatidylcholine alkyl-acyl 42:5	T2DM	rs2144908	20	42985717	HNF4A	A	G	0.1857	-1.10714	NP	NP	0.000334154	4.6867	NP	NP
Phosphatidylcholine alkyl-acyl 42:5	T2DM	rs2237892	11	2839751	KCNQ1	T	C	0.0577	0.978261	NP	NP	0.000691096	-7.32423	NP	NP
Phosphatidylcholine alkyl-acyl 42:5	T2DM	rs2261181	12	66212318	RPSAP52	T	C	0.1015	-0.202899	NP	NP	0.000275355	5.77781	NP	NP
Phosphatidylcholine alkyl-acyl 42:5	T2DM	rs2290203	15	91512067	LOC100507118	A	G	0.2102	0.235294	NP	NP	0.000291967	5.50545	NP	NP
Phosphatidylcholine alkyl-acyl 42:5	T2DM	rs231361	11	2691500	KCNQ1OT1	A	G	0.2435	1.36735	NP	NP	0.000488167	7.67001	NP	NP
Phosphatidylcholine alkyl-acyl 42:5	T2DM	rs2383208	9	22132076	CDKN2B, AS1(dist=10983), DMRTA1(dist=314764)	A	G	0.8281	-0.684211	NP	NP	0.00134378	10.8982	NP	NP
Phosphatidylcholine alkyl-acyl 42:5	T2DM	rs243018	2	60586707	FLJ30838(dist=1295806), MIR4432(dist=27790)	C	G	0.5208	2.90476	NP	NP	0.000316372	-8.22075	NP	NP
Phosphatidylcholine alkyl-acyl 42:5	T2DM	rs4237150	9	4290085	GLIS3	C	G	0.4166	-0.738095	NP	NP	0.000281865	4.79579	NP	NP
Phosphatidylcholine alkyl-acyl 42:5	T2DM	rs4580722	4	6306144	WFS1(dist=1152), PPP2R2C(dist=16161)	A	C	0.5793	0.113636	NP	NP	0.000424296	7.67001	NP	NP
Phosphatidylcholine alkyl-acyl 42:5	T2DM	rs4719433	7	15065003	DGKB(dist=183928), AGMO(dist=174940)	T	C	0.4623	-1.40476	NP	NP	0.000383784	-5.50545	NP	NP
Phosphatidylcholine alkyl-acyl 42:5	T2DM	rs5015480	10	94465559	HHEX(dist=10151), EXOC6(dist=128911)	T	C	0.4133	0.261905	NP	NP	0.000878314	-9.14217	NP	NP
Phosphatidylcholine alkyl-acyl 42:5	T2DM	rs5215	11	17408630	KCNJ11	T	C	0.6369	1.97619	NP	NP	0.000399791	-9.2897	NP	NP
Phosphatidylcholine alkyl-acyl 42:5	T2DM	rs6103716	20	42999630	HNF4A	A	C	0.6685	0.590909	NP	NP	0.000322944	-5.50545	NP	NP
Phosphatidylcholine alkyl-acyl 42:5	T2DM	rs6444187	3	186674138	ST6GAL1	C	G	0.4229	-0.953488	NP	NP	0.000393307	-6.94261	NP	NP
Phosphatidylcholine alkyl-acyl 42:5	T2DM	rs6494307	15	62394690	C2CD4A(dist=31574), C2CD4B(dist=61047)	C	G	0.5699	0.190476	NP	NP	0.000292779	4.79579	NP	NP
Phosphatidylcholine alkyl-acyl 42:5	T2DM	rs6813195	4	153520475	DKFZP434I0714(dist=60060), TMEM154(dist=26791)	T	C	0.2785	0.354167	NP	NP	0.000313621	-5.50545	NP	NP
Phosphatidylcholine alkyl-acyl 42:5	T2DM	rs6928012	6	20728513	CDKAL1	T	C	0.6035	2.42857	NP	NP	0.000329188	-8.22075	NP	NP
Phosphatidylcholine alkyl-acyl 42:5	T2DM	rs7178572	15	77747190	HMG20A	A	G	0.2945	0.822222	NP	NP	0.000435302	-6.22107	NP	NP
Phosphatidylcholine alkyl-acyl 42:5	T2DM	rs7501939	17	36101156	HNF1B	T	C	0.4082	-1.13725	NP	NP	0.000540926	5.77781	NP	NP
Phosphatidylcholine alkyl-acyl 42:5	T2DM	rs864745	7	28180556	JAZF1	T	C	0.5224	-1.41463	NP	NP	0.000469056	6.94261	NP	NP
Phosphatidylcholine alkyl-acyl 42:5	T2DM	rs896854	8	95960511	TP53INP1	T	C	0.5077	-2.19048	NP	NP	0.000347538	5.50545	NP	NP
Phosphatidylcholine alkyl-acyl 44:3	T2DM	rs10440833	6	20688121	CDKAL1	A	T	0.282	0.298246	NP	NP	0.0013103	12.9216	NP	NP
Phosphatidylcholine alkyl-acyl 44:3	T2DM	rs10830962	11	92698427	FAT3(dist=68792), MTNR1B(dist=4362)	C	G	0.6099	-0.418182	NP	NP	0.000388665	-6.22107	NP	NP
Phosphatidylcholine alkyl-acyl 44:3	T2DM	rs10842993	12	27964648	KLHL42(dist=8675), PTHLH(dist=146369)	A	G	0.2169	-0.078125	NP	NP	0.000321092	-4.6867	NP	NP
Phosphatidylcholine alkyl-acyl 44:3	T2DM	rs11257655	10	12307894	CDC123(dist=15305), CAMK1D(dist=83689)	T	C	0.2105	1.57812	NP	NP	0.000360805	6.94261	NP	NP
Phosphatidylcholine alkyl-acyl 44:3	T2DM	rs11708067	3	123065778	ADCY5	A	G	0.7683	0.672131	NP	NP	0.000325019	5.23007	NP	NP
Phosphatidylcholine alkyl-acyl 44:3	T2DM	rs1215468	13	80707429	NDFIP2(dist=577217), SPRY2(dist=202683)	A	G	0.7263	-1.4386	NP	NP	0.000304833	4.14774	NP	NP
Phosphatidylcholine alkyl-acyl 44:3	T2DM	rs12571751	10	80942631	ZMIZ1	A	G	0.5249	-1.72549	NP	NP	0.00038775	9.2897	NP	NP
Phosphatidylcholine alkyl-acyl 44:3	T2DM	rs13266634	8	118184783	SLC30A8	T	C	0.3183	0.0363636	NP	NP	0.000829979	-9.88684	NP	NP
Phosphatidylcholine alkyl-acyl 44:3	T2DM	rs13293121	9	81881830	PSAT1(dist=936821), TLE4(dist=305048)	A	G	0.9411	-0.530973	NP	NP	0.000378043	6.15326	NP	NP
Phosphatidylcholine alkyl-acyl 44:3	T2DM	rs1495130	3	23241009	ZNF385D(dist=1448193), UBE2E2(dist=3775)	C	G	0.915	-0.304348	NP	NP	0.000382697	6.32989	NP	NP
Phosphatidylcholine alkyl-acyl 44:3	T2DM	rs163184	11	2847069	KCNQ1	T	G	0.5073	-1.03774	NP	NP	0.000584806	-7.67001	NP	NP
Phosphatidylcholine alkyl-acyl 44:3	T2DM	rs2144908	20	42985717	HNF4A	A	G	0.1851	0	NP	NP	0.000334154	4.6867	NP	NP
Phosphatidylcholine alkyl-acyl 44:3	T2DM	rs2237892	11	2839751	KCNQ1	T	C	0.0616	0.936364	NP	NP	0.000691096	-7.32423	NP	NP
Phosphatidylcholine alkyl-acyl 44:3	T2DM	rs2261181	12	66212318	RPSAP52	T	C	0.1008	1.52941	NP	NP	0.000275355	5.77781	NP	NP
Phosphatidylcholine alkyl-acyl 44:3	T2DM	rs2290203	15	91512067	LOC100507118	A	G	0.2113	-0.857143	NP	NP	0.000291967	5.50545	NP	NP
Phosphatidylcholine alkyl-acyl 44:3	T2DM	rs231361	11	2691500	KCNQ1OT1	A	G	0.2452	0.283333	NP	NP	0.000488167	7.67001	NP	NP
Phosphatidylcholine alkyl-acyl 44:3	T2DM	rs2383208	9	22132076	CDKN2B, AS1(dist=10983), DMRTA1(dist=314764)	A	G	0.8293	-0.826087	NP	NP	0.00134378	10.8982	NP	NP
Phosphatidylcholine alkyl-acyl 44:3	T2DM	rs243018	2	60586707	FLJ30838(dist=1295806), MIR4432(dist=27790)	C	G	0.5218	2.27451	NP	NP	0.000316372	-8.22075	NP	NP
Phosphatidylcholine alkyl-acyl 44:3	T2DM	rs4237150	9	4290085	GLIS3	C	G	0.4205	-0.509804	NP	NP	0.000281865	4.79579	NP	NP
Phosphatidylcholine alkyl-acyl 44:3	T2DM	rs4580722	4	6306144	WFS1(dist=1152), PPP2R2C(dist=16161)	A	C	0.5793	-0.62963	NP	NP	0.000424296	7.67001	NP	NP
Phosphatidylcholine alkyl-acyl 44:3	T2DM	rs4719433	7	15065003	DGKB(dist=183928), AGMO(dist=174940)	T	C	0.4628	-0.823529	NP	NP	0.000383784	-5.50545	NP	NP
Phosphatidylcholine alkyl-acyl 44:3	T2DM	rs5015480	10	94465559	HHEX(dist=10151), EXOC6(dist=128911)	T	C	0.4135	0.27451	NP	NP	0.000878314	-9.14217	NP	NP
Phosphatidylcholine alkyl-acyl 44:3	T2DM	rs5215	11	17408630	KCNJ11	T	C	0.6352	1.84615	NP	NP	0.000399791	-9.2897	NP	NP
Phosphatidylcholine alkyl-acyl 44:3	T2DM	rs6103716	20	42999630	HNF4A	A	C	0.6669	-0.444444	NP	NP	0.000322944	-5.50545	NP	NP
Phosphatidylcholine alkyl-acyl 44:3	T2DM	rs6444187	3	186674138	ST6GAL1	C	G	0.4297	-0.622642	NP	NP	0.000393307	-6.94261	NP	NP
Phosphatidylcholine alkyl-acyl 44:3	T2DM	rs6494307	15	62394690	C2CD4A(dist=31574), C2CD4B(dist=61047)	C	G	0.5681	0.176471	NP	NP	0.000292779	4.79579	NP	NP
Phosphatidylcholine alkyl-acyl 44:3	T2DM	rs6813195	4	153520475	DKFZP434I0714(dist=60060), TMEM154(dist=26791)	T	C	0.2733	-0.338983	NP	NP	0.000313621	-5.50545	NP	NP
Phosphatidylcholine alkyl-acyl 44:3	T2DM	rs6928012	6	20728513	CDKAL1	T	C	0.6001	1.34615	NP	NP	0.000329188	-8.22075	NP	NP
Phosphatidylcholine alkyl-acyl 44:3	T2DM	rs7178572	15	77747190	HMG20A	A	G	0.297	0.509091	NP	NP	0.000435302	-6.22107	NP	NP
Phosphatidylcholine alkyl-acyl 44:3	T2DM	rs7501939	17	36101156	HNF1B	T	C	0.3996	-0.333333	NP	NP	0.000540926	5.77781	NP	NP
Phosphatidylcholine alkyl-acyl 44:3	T2DM	rs864745	7	28180556	JAZF1	T	C	0.5191	-1.64	NP	NP	0.000469056	6.94261	NP	NP
Phosphatidylcholine alkyl-acyl 44:3	T2DM	rs896854	8	95960511	TP53INP1	T	C	0.5078	-2.33333	NP	NP	0.000347538	5.50545	NP	NP
Phosphatidylcholine alkyl-acyl 44:4	T2DM	rs10440833	6	20688121	CDKAL1	A	T	0.2811	-2.10204	NP	NP	0.0013103	12.9216	NP	NP
Phosphatidylcholine alkyl-acyl 44:4	T2DM	rs10830962	11	92698427	FAT3(dist=68792), MTNR1B(dist=4362)	C	G	0.6123	-0.770833	NP	NP	0.000388665	-6.22107	NP	NP
Phosphatidylcholine alkyl-acyl 44:4	T2DM	rs10842993	12	27964648	KLHL42(dist=8675), PTHLH(dist=146369)	A	G	0.2159	2.76786	NP	NP	0.000321092	-4.6867	NP	NP
Phosphatidylcholine alkyl-acyl 44:4	T2DM	rs11257655	10	12307894	CDC123(dist=15305), CAMK1D(dist=83689)	T	C	0.2092	0.410714	NP	NP	0.000360805	6.94261	NP	NP
Phosphatidylcholine alkyl-acyl 44:4	T2DM	rs11708067	3	123065778	ADCY5	A	G	0.7651	0.528302	NP	NP	0.000325019	5.23007	NP	NP
Phosphatidylcholine alkyl-acyl 44:4	T2DM	rs1215468	13	80707429	NDFIP2(dist=577217), SPRY2(dist=202683)	A	G	0.7241	-1.36	NP	NP	0.000304833	4.14774	NP	NP
Phosphatidylcholine alkyl-acyl 44:4	T2DM	rs12571751	10	80942631	ZMIZ1	A	G	0.5229	-2.44444	NP	NP	0.00038775	9.2897	NP	NP
Phosphatidylcholine alkyl-acyl 44:4	T2DM	rs13266634	8	118184783	SLC30A8	T	C	0.3178	-0.145833	NP	NP	0.000829979	-9.88684	NP	NP
Phosphatidylcholine alkyl-acyl 44:4	T2DM	rs13293121	9	81881830	PSAT1(dist=936821), TLE4(dist=305048)	A	G	0.941	0.234694	NP	NP	0.000378043	6.15326	NP	NP
Phosphatidylcholine alkyl-acyl 44:4	T2DM	rs1495130	3	23241009	ZNF385D(dist=1448193), UBE2E2(dist=3775)	C	G	0.9157	-0.3375	NP	NP	0.000382697	6.32989	NP	NP
Phosphatidylcholine alkyl-acyl 44:4	T2DM	rs163184	11	2847069	KCNQ1	T	G	0.5067	0.5	NP	NP	0.000584806	-7.67001	NP	NP
Phosphatidylcholine alkyl-acyl 44:4	T2DM	rs2144908	20	42985717	HNF4A	A	G	0.1864	-0.576271	NP	NP	0.000334154	4.6867	NP	NP
Phosphatidylcholine alkyl-acyl 44:4	T2DM	rs2237892	11	2839751	KCNQ1	T	C	0.0598	1.7732	NP	NP	0.000691096	-7.32423	NP	NP
Phosphatidylcholine alkyl-acyl 44:4	T2DM	rs2261181	12	66212318	RPSAP52	T	C	0.0988	-0.133333	NP	NP	0.000275355	5.77781	NP	NP
Phosphatidylcholine alkyl-acyl 44:4	T2DM	rs2290203	15	91512067	LOC100507118	A	G	0.2117	0.981818	NP	NP	0.000291967	5.50545	NP	NP
Phosphatidylcholine alkyl-acyl 44:4	T2DM	rs231361	11	2691500	KCNQ1OT1	A	G	0.2449	1.09434	NP	NP	0.000488167	7.67001	NP	NP
Phosphatidylcholine alkyl-acyl 44:4	T2DM	rs2383208	9	22132076	CDKN2B, AS1(dist=10983), DMRTA1(dist=314764)	A	G	0.8309	-0.721311	NP	NP	0.00134378	10.8982	NP	NP
Phosphatidylcholine alkyl-acyl 44:4	T2DM	rs243018	2	60586707	FLJ30838(dist=1295806), MIR4432(dist=27790)	C	G	0.5204	1.77778	NP	NP	0.000316372	-8.22075	NP	NP
Phosphatidylcholine alkyl-acyl 44:4	T2DM	rs4237150	9	4290085	GLIS3	C	G	0.4185	-1.75	NP	NP	0.000281865	4.79579	NP	NP
Phosphatidylcholine alkyl-acyl 44:4	T2DM	rs4580722	4	6306144	WFS1(dist=1152), PPP2R2C(dist=16161)	A	C	0.5764	0.106383	NP	NP	0.000424296	7.67001	NP	NP
Phosphatidylcholine alkyl-acyl 44:4	T2DM	rs4719433	7	15065003	DGKB(dist=183928), AGMO(dist=174940)	T	C	0.4635	-1.13333	NP	NP	0.000383784	-5.50545	NP	NP
Phosphatidylcholine alkyl-acyl 44:4	T2DM	rs5015480	10	94465559	HHEX(dist=10151), EXOC6(dist=128911)	T	C	0.4134	-0.111111	NP	NP	0.000878314	-9.14217	NP	NP
Phosphatidylcholine alkyl-acyl 44:4	T2DM	rs5215	11	17408630	KCNJ11	T	C	0.635	1.82609	NP	NP	0.000399791	-9.2897	NP	NP
Phosphatidylcholine alkyl-acyl 44:4	T2DM	rs6103716	20	42999630	HNF4A	A	C	0.6675	-0.574468	NP	NP	0.000322944	-5.50545	NP	NP
Phosphatidylcholine alkyl-acyl 44:4	T2DM	rs6444187	3	186674138	ST6GAL1	C	G	0.4309	-0.652174	NP	NP	0.000393307	-6.94261	NP	NP
Phosphatidylcholine alkyl-acyl 44:4	T2DM	rs6494307	15	62394690	C2CD4A(dist=31574), C2CD4B(dist=61047)	C	G	0.568	0.644444	NP	NP	0.000292779	4.79579	NP	NP
Phosphatidylcholine alkyl-acyl 44:4	T2DM	rs6813195	4	153520475	DKFZP434I0714(dist=60060), TMEM154(dist=26791)	T	C	0.271	0.211538	NP	NP	0.000313621	-5.50545	NP	NP
Phosphatidylcholine alkyl-acyl 44:4	T2DM	rs6928012	6	20728513	CDKAL1	T	C	0.6008	1.64444	NP	NP	0.000329188	-8.22075	NP	NP
Phosphatidylcholine alkyl-acyl 44:4	T2DM	rs7178572	15	77747190	HMG20A	A	G	0.2945	0.645833	NP	NP	0.000435302	-6.22107	NP	NP
Phosphatidylcholine alkyl-acyl 44:4	T2DM	rs7501939	17	36101156	HNF1B	T	C	0.3993	-0.0384615	NP	NP	0.000540926	5.77781	NP	NP
Phosphatidylcholine alkyl-acyl 44:4	T2DM	rs864745	7	28180556	JAZF1	T	C	0.5199	-2.04545	NP	NP	0.000469056	6.94261	NP	NP
Phosphatidylcholine alkyl-acyl 44:4	T2DM	rs896854	8	95960511	TP53INP1	T	C	0.5058	-2.04444	NP	NP	0.000347538	5.50545	NP	NP
Phosphatidylcholine alkyl-acyl 44:5	T2DM	rs10440833	6	20688121	CDKAL1	A	T	0.2803	-2.16364	NP	NP	0.0013103	12.9216	NP	NP
Phosphatidylcholine alkyl-acyl 44:5	T2DM	rs10830962	11	92698427	FAT3(dist=68792), MTNR1B(dist=4362)	C	G	0.6119	-2.18519	NP	NP	0.000388665	-6.22107	NP	NP
Phosphatidylcholine alkyl-acyl 44:5	T2DM	rs10842993	12	27964648	KLHL42(dist=8675), PTHLH(dist=146369)	A	G	0.2151	2.15873	NP	NP	0.000321092	-4.6867	NP	NP
Phosphatidylcholine alkyl-acyl 44:5	T2DM	rs11257655	10	12307894	CDC123(dist=15305), CAMK1D(dist=83689)	T	C	0.2092	1.46774	NP	NP	0.000360805	6.94261	NP	NP
Phosphatidylcholine alkyl-acyl 44:5	T2DM	rs11708067	3	123065778	ADCY5	A	G	0.7657	-0.338983	NP	NP	0.000325019	5.23007	NP	NP
Phosphatidylcholine alkyl-acyl 44:5	T2DM	rs1215468	13	80707429	NDFIP2(dist=577217), SPRY2(dist=202683)	A	G	0.7234	0.109091	NP	NP	0.000304833	4.14774	NP	NP
Phosphatidylcholine alkyl-acyl 44:5	T2DM	rs12571751	10	80942631	ZMIZ1	A	G	0.5228	-2.62	NP	NP	0.00038775	9.2897	NP	NP
Phosphatidylcholine alkyl-acyl 44:5	T2DM	rs13266634	8	118184783	SLC30A8	T	C	0.3171	0.169811	NP	NP	0.000829979	-9.88684	NP	NP
Phosphatidylcholine alkyl-acyl 44:5	T2DM	rs13293121	9	81881830	PSAT1(dist=936821), TLE4(dist=305048)	A	G	0.9413	0.527273	NP	NP	0.000378043	6.15326	NP	NP
Phosphatidylcholine alkyl-acyl 44:5	T2DM	rs1495130	3	23241009	ZNF385D(dist=1448193), UBE2E2(dist=3775)	C	G	0.9155	-0.516854	NP	NP	0.000382697	6.32989	NP	NP
Phosphatidylcholine alkyl-acyl 44:5	T2DM	rs163184	11	2847069	KCNQ1	T	G	0.5078	0.0961538	NP	NP	0.000584806	-7.67001	NP	NP
Phosphatidylcholine alkyl-acyl 44:5	T2DM	rs2144908	20	42985717	HNF4A	A	G	0.1858	-0.181818	NP	NP	0.000334154	4.6867	NP	NP
Phosphatidylcholine alkyl-acyl 44:5	T2DM	rs2237892	11	2839751	KCNQ1	T	C	0.0598	1.16822	NP	NP	0.000691096	-7.32423	NP	NP
Phosphatidylcholine alkyl-acyl 44:5	T2DM	rs2261181	12	66212318	RPSAP52	T	C	0.0999	-1.08434	NP	NP	0.000275355	5.77781	NP	NP
Phosphatidylcholine alkyl-acyl 44:5	T2DM	rs2290203	15	91512067	LOC100507118	A	G	0.2114	1.03279	NP	NP	0.000291967	5.50545	NP	NP
Phosphatidylcholine alkyl-acyl 44:5	T2DM	rs231361	11	2691500	KCNQ1OT1	A	G	0.2437	1.39655	NP	NP	0.000488167	7.67001	NP	NP
Phosphatidylcholine alkyl-acyl 44:5	T2DM	rs2383208	9	22132076	CDKN2B, AS1(dist=10983), DMRTA1(dist=314764)	A	G	0.8301	-0.880597	NP	NP	0.00134378	10.8982	NP	NP
Phosphatidylcholine alkyl-acyl 44:5	T2DM	rs4237150	9	4290085	GLIS3	C	G	0.4184	-0.714286	NP	NP	0.000281865	4.79579	NP	NP
Phosphatidylcholine alkyl-acyl 44:5	T2DM	rs4580722	4	6306144	WFS1(dist=1152), PPP2R2C(dist=16161)	A	C	0.5776	0.192308	NP	NP	0.000424296	7.67001	NP	NP
Phosphatidylcholine alkyl-acyl 44:5	T2DM	rs4719433	7	15065003	DGKB(dist=183928), AGMO(dist=174940)	T	C	0.4636	-1.46	NP	NP	0.000383784	-5.50545	NP	NP
Phosphatidylcholine alkyl-acyl 44:5	T2DM	rs5015480	10	94465559	HHEX(dist=10151), EXOC6(dist=128911)	T	C	0.4145	-0.367347	NP	NP	0.000878314	-9.14217	NP	NP
Phosphatidylcholine alkyl-acyl 44:5	T2DM	rs5215	11	17408630	KCNJ11	T	C	0.6361	1.70588	NP	NP	0.000399791	-9.2897	NP	NP
Phosphatidylcholine alkyl-acyl 44:5	T2DM	rs6103716	20	42999630	HNF4A	A	C	0.6675	-0.849057	NP	NP	0.000322944	-5.50545	NP	NP
Phosphatidylcholine alkyl-acyl 44:5	T2DM	rs6444187	3	186674138	ST6GAL1	C	G	0.4299	-0.803922	NP	NP	0.000393307	-6.94261	NP	NP
Phosphatidylcholine alkyl-acyl 44:5	T2DM	rs6494307	15	62394690	C2CD4A(dist=31574), C2CD4B(dist=61047)	C	G	0.5682	0.66	NP	NP	0.000292779	4.79579	NP	NP
Phosphatidylcholine alkyl-acyl 44:5	T2DM	rs6813195	4	153520475	DKFZP434I0714(dist=60060), TMEM154(dist=26791)	T	C	0.2721	-0.241379	NP	NP	0.000313621	-5.50545	NP	NP
Phosphatidylcholine alkyl-acyl 44:5	T2DM	rs6928012	6	20728513	CDKAL1	T	C	0.6007	1.22	NP	NP	0.000329188	-8.22075	NP	NP
Phosphatidylcholine alkyl-acyl 44:5	T2DM	rs7178572	15	77747190	HMG20A	A	G	0.2955	0.698113	NP	NP	0.000435302	-6.22107	NP	NP
Phosphatidylcholine alkyl-acyl 44:5	T2DM	rs7501939	17	36101156	HNF1B	T	C	0.4009	-1.40678	NP	NP	0.000540926	5.77781	NP	NP
Phosphatidylcholine alkyl-acyl 44:5	T2DM	rs864745	7	28180556	JAZF1	T	C	0.5196	-1.16327	NP	NP	0.000469056	6.94261	NP	NP
Phosphatidylcholine alkyl-acyl 44:5	T2DM	rs896854	8	95960511	TP53INP1	T	C	0.507	-2.1	NP	NP	0.000347538	5.50545	NP	NP
Phosphatidylcholine alkyl-acyl 44:6	T2DM	rs10440833	6	20688121	CDKAL1	A	T	0.2801	-2.68519	NP	NP	0.0013103	12.9216	NP	NP
Phosphatidylcholine alkyl-acyl 44:6	T2DM	rs10830962	11	92698427	FAT3(dist=68792), MTNR1B(dist=4362)	C	G	0.6125	-1.18868	NP	NP	0.000388665	-6.22107	NP	NP
Phosphatidylcholine alkyl-acyl 44:6	T2DM	rs10842993	12	27964648	KLHL42(dist=8675), PTHLH(dist=146369)	A	G	0.2147	1.67742	NP	NP	0.000321092	-4.6867	NP	NP
Phosphatidylcholine alkyl-acyl 44:6	T2DM	rs11257655	10	12307894	CDC123(dist=15305), CAMK1D(dist=83689)	T	C	0.2091	1.08197	NP	NP	0.000360805	6.94261	NP	NP
Phosphatidylcholine alkyl-acyl 44:6	T2DM	rs11708067	3	123065778	ADCY5	A	G	0.7647	0.310345	NP	NP	0.000325019	5.23007	NP	NP
Phosphatidylcholine alkyl-acyl 44:6	T2DM	rs1215468	13	80707429	NDFIP2(dist=577217), SPRY2(dist=202683)	A	G	0.723	-0.0185185	NP	NP	0.000304833	4.14774	NP	NP
Phosphatidylcholine alkyl-acyl 44:6	T2DM	rs12571751	10	80942631	ZMIZ1	A	G	0.5225	-2.30612	NP	NP	0.00038775	9.2897	NP	NP
Phosphatidylcholine alkyl-acyl 44:6	T2DM	rs13266634	8	118184783	SLC30A8	T	C	0.3167	0.169811	NP	NP	0.000829979	-9.88684	NP	NP
Phosphatidylcholine alkyl-acyl 44:6	T2DM	rs13293121	9	81881830	PSAT1(dist=936821), TLE4(dist=305048)	A	G	0.9412	0.376147	NP	NP	0.000378043	6.15326	NP	NP
Phosphatidylcholine alkyl-acyl 44:6	T2DM	rs1495130	3	23241009	ZNF385D(dist=1448193), UBE2E2(dist=3775)	C	G	0.9156	-0.0568182	NP	NP	0.000382697	6.32989	NP	NP
Phosphatidylcholine alkyl-acyl 44:6	T2DM	rs163184	11	2847069	KCNQ1	T	G	0.5077	-0.294118	NP	NP	0.000584806	-7.67001	NP	NP
Phosphatidylcholine alkyl-acyl 44:6	T2DM	rs2144908	20	42985717	HNF4A	A	G	0.1861	-0.615385	NP	NP	0.000334154	4.6867	NP	NP
Phosphatidylcholine alkyl-acyl 44:6	T2DM	rs2237892	11	2839751	KCNQ1	T	C	0.0593	0.575472	NP	NP	0.000691096	-7.32423	NP	NP
Phosphatidylcholine alkyl-acyl 44:6	T2DM	rs2261181	12	66212318	RPSAP52	T	C	0.0995	-0.0609756	NP	NP	0.000275355	5.77781	NP	NP
Phosphatidylcholine alkyl-acyl 44:6	T2DM	rs2290203	15	91512067	LOC100507118	A	G	0.2114	0.416667	NP	NP	0.000291967	5.50545	NP	NP
Phosphatidylcholine alkyl-acyl 44:6	T2DM	rs231361	11	2691500	KCNQ1OT1	A	G	0.2438	1.7069	NP	NP	0.000488167	7.67001	NP	NP
Phosphatidylcholine alkyl-acyl 44:6	T2DM	rs2383208	9	22132076	CDKN2B, AS1(dist=10983), DMRTA1(dist=314764)	A	G	0.8303	-1.07463	NP	NP	0.00134378	10.8982	NP	NP
Phosphatidylcholine alkyl-acyl 44:6	T2DM	rs243018	2	60586707	FLJ30838(dist=1295806), MIR4432(dist=27790)	C	G	0.5213	2.83673	NP	NP	0.000316372	-8.22075	NP	NP
Phosphatidylcholine alkyl-acyl 44:6	T2DM	rs4237150	9	4290085	GLIS3	C	G	0.418	-0.122449	NP	NP	0.000281865	4.79579	NP	NP
Phosphatidylcholine alkyl-acyl 44:6	T2DM	rs4580722	4	6306144	WFS1(dist=1152), PPP2R2C(dist=16161)	A	C	0.5771	0.403846	NP	NP	0.000424296	7.67001	NP	NP
Phosphatidylcholine alkyl-acyl 44:6	T2DM	rs4719433	7	15065003	DGKB(dist=183928), AGMO(dist=174940)	T	C	0.4637	-0.489796	NP	NP	0.000383784	-5.50545	NP	NP
Phosphatidylcholine alkyl-acyl 44:6	T2DM	rs5015480	10	94465559	HHEX(dist=10151), EXOC6(dist=128911)	T	C	0.4143	0.122449	NP	NP	0.000878314	-9.14217	NP	NP
Phosphatidylcholine alkyl-acyl 44:6	T2DM	rs5215	11	17408630	KCNJ11	T	C	0.636	2.18	NP	NP	0.000399791	-9.2897	NP	NP
Phosphatidylcholine alkyl-acyl 44:6	T2DM	rs6103716	20	42999630	HNF4A	A	C	0.6677	-0.538462	NP	NP	0.000322944	-5.50545	NP	NP
Phosphatidylcholine alkyl-acyl 44:6	T2DM	rs6444187	3	186674138	ST6GAL1	C	G	0.4298	-0.941176	NP	NP	0.000393307	-6.94261	NP	NP
Phosphatidylcholine alkyl-acyl 44:6	T2DM	rs6494307	15	62394690	C2CD4A(dist=31574), C2CD4B(dist=61047)	C	G	0.5683	0.857143	NP	NP	0.000292779	4.79579	NP	NP
Phosphatidylcholine alkyl-acyl 44:6	T2DM	rs6813195	4	153520475	DKFZP434I0714(dist=60060), TMEM154(dist=26791)	T	C	0.2719	-0.508772	NP	NP	0.000313621	-5.50545	NP	NP
Phosphatidylcholine alkyl-acyl 44:6	T2DM	rs6928012	6	20728513	CDKAL1	T	C	0.601	1.7	NP	NP	0.000329188	-8.22075	NP	NP
Phosphatidylcholine alkyl-acyl 44:6	T2DM	rs7178572	15	77747190	HMG20A	A	G	0.2949	1.34615	NP	NP	0.000435302	-6.22107	NP	NP
Phosphatidylcholine alkyl-acyl 44:6	T2DM	rs7501939	17	36101156	HNF1B	T	C	0.4011	-1.07018	NP	NP	0.000540926	5.77781	NP	NP
Phosphatidylcholine alkyl-acyl 44:6	T2DM	rs864745	7	28180556	JAZF1	T	C	0.5199	-0.877551	NP	NP	0.000469056	6.94261	NP	NP
Phosphatidylcholine alkyl-acyl 44:6	T2DM	rs896854	8	95960511	TP53INP1	T	C	0.5065	-2.28571	NP	NP	0.000347538	5.50545	NP	NP
Phosphatidylcholine diacyl 32:1	T2DM	rs10440833	6	20688121	CDKAL1	A	T	0.279	-0.0915493	NP	NP	0.0013103	12.9216	NP	NP
Phosphatidylcholine diacyl 32:1	T2DM	rs10830962	11	92698427	FAT3(dist=68792), MTNR1B(dist=4362)	C	G	0.6474	0.0222985	NP	NP	0.000388665	-6.22107	NP	NP
Phosphatidylcholine diacyl 32:1	T2DM	rs10842993	12	27964648	KLHL42(dist=8675), PTHLH(dist=146369)	A	G	0.2029	1.32511	NP	NP	0.000321092	-4.6867	NP	NP
Phosphatidylcholine diacyl 32:1	T2DM	rs11257655	10	12307894	CDC123(dist=15305), CAMK1D(dist=83689)	T	C	0.2046	-2.49121	NP	NP	0.000360805	6.94261	NP	NP
Phosphatidylcholine diacyl 32:1	T2DM	rs11708067	3	123065778	ADCY5	A	G	0.7303	0.718886	NP	NP	0.000325019	5.23007	NP	NP
Phosphatidylcholine diacyl 32:1	T2DM	rs1215468	13	80707429	NDFIP2(dist=577217), SPRY2(dist=202683)	A	G	0.7154	-1.77352	NP	NP	0.000304833	4.14774	NP	NP
Phosphatidylcholine diacyl 32:1	T2DM	rs12571751	10	80942631	ZMIZ1	A	G	0.5185	1.0164	NP	NP	0.00038775	9.2897	NP	NP
Phosphatidylcholine diacyl 32:1	T2DM	rs13266634	8	118184783	SLC30A8	T	C	0.3022	1.2411	NP	NP	0.000829979	-9.88684	NP	NP
Phosphatidylcholine diacyl 32:1	T2DM	rs13293121	9	81881830	PSAT1(dist=936821), TLE4(dist=305048)	A	G	0.9423	-1.32001	NP	NP	0.000378043	6.15326	NP	NP
Phosphatidylcholine diacyl 32:1	T2DM	rs1495130	3	23241009	ZNF385D(dist=1448193), UBE2E2(dist=3775)	C	G	0.9016	-0.259287	NP	NP	0.000382697	6.32989	NP	NP
Phosphatidylcholine diacyl 32:1	T2DM	rs163184	11	2847069	KCNQ1	T	G	0.5296	-1.5638	NP	NP	0.000584806	-7.67001	NP	NP
Phosphatidylcholine diacyl 32:1	T2DM	rs2144908	20	42985717	HNF4A	A	G	0.1823	0.212936	NP	NP	0.000334154	4.6867	NP	NP
Phosphatidylcholine diacyl 32:1	T2DM	rs2237892	11	2839751	KCNQ1	T	C	0.06	-0.0713991	NP	NP	0.000691096	-7.32423	NP	NP
Phosphatidylcholine diacyl 32:1	T2DM	rs2261181	12	66212318	RPSAP52	T	C	0.0885	0.029511	NP	NP	0.000275355	5.77781	NP	NP
Phosphatidylcholine diacyl 32:1	T2DM	rs2290203	15	91512067	LOC100507118	A	G	0.2162	-0.896327	NP	NP	0.000291967	5.50545	NP	NP
Phosphatidylcholine diacyl 32:1	T2DM	rs231361	11	2691500	KCNQ1OT1	A	G	0.2345	0.992795	NP	NP	0.000488167	7.67001	NP	NP
Phosphatidylcholine diacyl 32:1	T2DM	rs2383208	9	22132076	CDKN2B, AS1(dist=10983), DMRTA1(dist=314764)	A	G	0.8134	-1.54455	NP	NP	0.00134378	10.8982	NP	NP
Phosphatidylcholine diacyl 32:1	T2DM	rs243018	2	60586707	FLJ30838(dist=1295806), MIR4432(dist=27790)	C	G	0.5466	1.71461	NP	NP	0.000316372	-8.22075	NP	NP
Phosphatidylcholine diacyl 32:1	T2DM	rs4237150	9	4290085	GLIS3	C	G	0.4131	0.804167	NP	NP	0.000281865	4.79579	NP	NP
Phosphatidylcholine diacyl 32:1	T2DM	rs4580722	4	6306144	WFS1(dist=1152), PPP2R2C(dist=16161)	A	C	0.5826	-0.0113142	NP	NP	0.000424296	7.67001	NP	NP
Phosphatidylcholine diacyl 32:1	T2DM	rs4719433	7	15065003	DGKB(dist=183928), AGMO(dist=174940)	T	C	0.4631	-1.74094	NP	NP	0.000383784	-5.50545	NP	NP
Phosphatidylcholine diacyl 32:1	T2DM	rs5015480	10	94465559	HHEX(dist=10151), EXOC6(dist=128911)	T	C	0.3961	1.34252	NP	NP	0.000878314	-9.14217	NP	NP
Phosphatidylcholine diacyl 32:1	T2DM	rs5215	11	17408630	KCNJ11	T	C	0.6359	-0.797056	NP	NP	0.000399791	-9.2897	NP	NP
Phosphatidylcholine diacyl 32:1	T2DM	rs6103716	20	42999630	HNF4A	A	C	0.6911	-0.141152	NP	NP	0.000322944	-5.50545	NP	NP
Phosphatidylcholine diacyl 32:1	T2DM	rs6444187	3	186674138	ST6GAL1	C	G	0.4082	0.484752	NP	NP	0.000393307	-6.94261	NP	NP
Phosphatidylcholine diacyl 32:1	T2DM	rs6494307	15	62394690	C2CD4A(dist=31574), C2CD4B(dist=61047)	C	G	0.5573	0.551632	NP	NP	0.000292779	4.79579	NP	NP
Phosphatidylcholine diacyl 32:1	T2DM	rs6813195	4	153520475	DKFZP434I0714(dist=60060), TMEM154(dist=26791)	T	C	0.264	1.5549	NP	NP	0.000313621	-5.50545	NP	NP
Phosphatidylcholine diacyl 32:1	T2DM	rs6928012	6	20728513	CDKAL1	T	C	0.6126	-0.661678	NP	NP	0.000329188	-8.22075	NP	NP
Phosphatidylcholine diacyl 32:1	T2DM	rs7178572	15	77747190	HMG20A	A	G	0.2834	-0.590164	NP	NP	0.000435302	-6.22107	NP	NP
Phosphatidylcholine diacyl 32:1	T2DM	rs7501939	17	36101156	HNF1B	T	C	0.4093	1.48323	NP	NP	0.000540926	5.77781	NP	NP
Phosphatidylcholine diacyl 32:1	T2DM	rs864745	7	28180556	JAZF1	T	C	0.5081	-0.774492	NP	NP	0.000469056	6.94261	NP	NP
Phosphatidylcholine diacyl 32:1	T2DM	rs896854	8	95960511	TP53INP1	T	C	0.5065	1.1714	NP	NP	0.000347538	5.50545	NP	NP
Phosphatidylcholine diacyl 34:4 (LC-MS)	T2DM	rs10440833	6	20688121	CDKAL1	A	T	0.279	2.63211	NP	NP	0.0013103	12.9216	NP	NP
Phosphatidylcholine diacyl 34:4 (LC-MS)	T2DM	rs10830962	11	92698427	FAT3(dist=68792), MTNR1B(dist=4362)	C	G	0.6475	1.26991	NP	NP	0.000388665	-6.22107	NP	NP
Phosphatidylcholine diacyl 34:4 (LC-MS)	T2DM	rs10842993	12	27964648	KLHL42(dist=8675), PTHLH(dist=146369)	A	G	0.2043	-0.466667	NP	NP	0.000321092	-4.6867	NP	NP
Phosphatidylcholine diacyl 34:4 (LC-MS)	T2DM	rs11257655	10	12307894	CDC123(dist=15305), CAMK1D(dist=83689)	T	C	0.2045	-0.0653595	NP	NP	0.000360805	6.94261	NP	NP
Phosphatidylcholine diacyl 34:4 (LC-MS)	T2DM	rs11708067	3	123065778	ADCY5	A	G	0.7301	1.06364	NP	NP	0.000325019	5.23007	NP	NP
Phosphatidylcholine diacyl 34:4 (LC-MS)	T2DM	rs1215468	13	80707429	NDFIP2(dist=577217), SPRY2(dist=202683)	A	G	0.7151	-1.0922	NP	NP	0.000304833	4.14774	NP	NP
Phosphatidylcholine diacyl 34:4 (LC-MS)	T2DM	rs12571751	10	80942631	ZMIZ1	A	G	0.5181	1.71795	NP	NP	0.00038775	9.2897	NP	NP
Phosphatidylcholine diacyl 34:4 (LC-MS)	T2DM	rs13266634	8	118184783	SLC30A8	T	C	0.3031	-1.20789	NP	NP	0.000829979	-9.88684	NP	NP
Phosphatidylcholine diacyl 34:4 (LC-MS)	T2DM	rs13293121	9	81881830	PSAT1(dist=936821), TLE4(dist=305048)	A	G	0.9421	-2.61261	NP	NP	0.000378043	6.15326	NP	NP
Phosphatidylcholine diacyl 34:4 (LC-MS)	T2DM	rs1495130	3	23241009	ZNF385D(dist=1448193), UBE2E2(dist=3775)	C	G	0.9015	-1.63393	NP	NP	0.000382697	6.32989	NP	NP
Phosphatidylcholine diacyl 34:4 (LC-MS)	T2DM	rs163184	11	2847069	KCNQ1	T	G	0.5288	-1.75	NP	NP	0.000584806	-7.67001	NP	NP
Phosphatidylcholine diacyl 34:4 (LC-MS)	T2DM	rs2144908	20	42985717	HNF4A	A	G	0.1839	0.0419847	NP	NP	0.000334154	4.6867	NP	NP
Phosphatidylcholine diacyl 34:4 (LC-MS)	T2DM	rs2237892	11	2839751	KCNQ1	T	C	0.06	-0.850158	NP	NP	0.000691096	-7.32423	NP	NP
Phosphatidylcholine diacyl 34:4 (LC-MS)	T2DM	rs2261181	12	66212318	RPSAP52	T	C	0.0893	0.911638	NP	NP	0.000275355	5.77781	NP	NP
Phosphatidylcholine diacyl 34:4 (LC-MS)	T2DM	rs2290203	15	91512067	LOC100507118	A	G	0.2164	0.32377	NP	NP	0.000291967	5.50545	NP	NP
Phosphatidylcholine diacyl 34:4 (LC-MS)	T2DM	rs231361	11	2691500	KCNQ1OT1	A	G	0.2361	-0.503247	NP	NP	0.000488167	7.67001	NP	NP
Phosphatidylcholine diacyl 34:4 (LC-MS)	T2DM	rs2383208	9	22132076	CDKN2B, AS1(dist=10983), DMRTA1(dist=314764)	A	G	0.813	-0.980282	NP	NP	0.00134378	10.8982	NP	NP
Phosphatidylcholine diacyl 34:4 (LC-MS)	T2DM	rs243018	2	60586707	FLJ30838(dist=1295806), MIR4432(dist=27790)	C	G	0.5458	1.39594	NP	NP	0.000316372	-8.22075	NP	NP
Phosphatidylcholine diacyl 34:4 (LC-MS)	T2DM	rs4237150	9	4290085	GLIS3	C	G	0.4132	1.06341	NP	NP	0.000281865	4.79579	NP	NP
Phosphatidylcholine diacyl 34:4 (LC-MS)	T2DM	rs4580722	4	6306144	WFS1(dist=1152), PPP2R2C(dist=16161)	A	C	0.5829	-1.49754	NP	NP	0.000424296	7.67001	NP	NP
Phosphatidylcholine diacyl 34:4 (LC-MS)	T2DM	rs4719433	7	15065003	DGKB(dist=183928), AGMO(dist=174940)	T	C	0.4626	-0.03	NP	NP	0.000383784	-5.50545	NP	NP
Phosphatidylcholine diacyl 34:4 (LC-MS)	T2DM	rs5015480	10	94465559	HHEX(dist=10151), EXOC6(dist=128911)	T	C	0.3964	-0.316406	NP	NP	0.000878314	-9.14217	NP	NP
Phosphatidylcholine diacyl 34:4 (LC-MS)	T2DM	rs5215	11	17408630	KCNJ11	T	C	0.6366	0.0115385	NP	NP	0.000399791	-9.2897	NP	NP
Phosphatidylcholine diacyl 34:4 (LC-MS)	T2DM	rs6103716	20	42999630	HNF4A	A	C	0.6914	0.756184	NP	NP	0.000322944	-5.50545	NP	NP
Phosphatidylcholine diacyl 34:4 (LC-MS)	T2DM	rs6444187	3	186674138	ST6GAL1	C	G	0.4081	-0.588517	NP	NP	0.000393307	-6.94261	NP	NP
Phosphatidylcholine diacyl 34:4 (LC-MS)	T2DM	rs6494307	15	62394690	C2CD4A(dist=31574), C2CD4B(dist=61047)	C	G	0.5566	-0.522388	NP	NP	0.000292779	4.79579	NP	NP
Phosphatidylcholine diacyl 34:4 (LC-MS)	T2DM	rs6813195	4	153520475	DKFZP434I0714(dist=60060), TMEM154(dist=26791)	T	C	0.2643	-0.125	NP	NP	0.000313621	-5.50545	NP	NP
Phosphatidylcholine diacyl 34:4 (LC-MS)	T2DM	rs6928012	6	20728513	CDKAL1	T	C	0.6137	0.537849	NP	NP	0.000329188	-8.22075	NP	NP
Phosphatidylcholine diacyl 34:4 (LC-MS)	T2DM	rs7178572	15	77747190	HMG20A	A	G	0.2831	-0.255245	NP	NP	0.000435302	-6.22107	NP	NP
Phosphatidylcholine diacyl 34:4 (LC-MS)	T2DM	rs7501939	17	36101156	HNF1B	T	C	0.4098	0.498008	NP	NP	0.000540926	5.77781	NP	NP
Phosphatidylcholine diacyl 34:4 (LC-MS)	T2DM	rs864745	7	28180556	JAZF1	T	C	0.5083	-1.14286	NP	NP	0.000469056	6.94261	NP	NP
Phosphatidylcholine diacyl 34:4 (LC-MS)	T2DM	rs896854	8	95960511	TP53INP1	T	C	0.5069	1.06667	NP	NP	0.000347538	5.50545	NP	NP
Phosphatidylcholine diacyl 34:4 (ESI-MS)	T2DM	rs10440833	6	20688121	CDKAL1	A	T	0.279	0.11165	NP	NP	0.0013103	12.9216	NP	NP
Phosphatidylcholine diacyl 34:4 (ESI-MS)	T2DM	rs10830962	11	92698427	FAT3(dist=68792), MTNR1B(dist=4362)	C	G	0.6476	-0.0854271	NP	NP	0.000388665	-6.22107	NP	NP
Phosphatidylcholine diacyl 34:4 (ESI-MS)	T2DM	rs10842993	12	27964648	KLHL42(dist=8675), PTHLH(dist=146369)	A	G	0.2046	0.4	NP	NP	0.000321092	-4.6867	NP	NP
Phosphatidylcholine diacyl 34:4 (ESI-MS)	T2DM	rs11257655	10	12307894	CDC123(dist=15305), CAMK1D(dist=83689)	T	C	0.2048	-0.965665	NP	NP	0.000360805	6.94261	NP	NP
Phosphatidylcholine diacyl 34:4 (ESI-MS)	T2DM	rs11708067	3	123065778	ADCY5	A	G	0.7293	-0.561181	NP	NP	0.000325019	5.23007	NP	NP
Phosphatidylcholine diacyl 34:4 (ESI-MS)	T2DM	rs1215468	13	80707429	NDFIP2(dist=577217), SPRY2(dist=202683)	A	G	0.7155	-1.85185	NP	NP	0.000304833	4.14774	NP	NP
Phosphatidylcholine diacyl 34:4 (ESI-MS)	T2DM	rs12571751	10	80942631	ZMIZ1	A	G	0.518	2.37234	NP	NP	0.00038775	9.2897	NP	NP
Phosphatidylcholine diacyl 34:4 (ESI-MS)	T2DM	rs13266634	8	118184783	SLC30A8	T	C	0.303	-0.577889	NP	NP	0.000829979	-9.88684	NP	NP
Phosphatidylcholine diacyl 34:4 (ESI-MS)	T2DM	rs13293121	9	81881830	PSAT1(dist=936821), TLE4(dist=305048)	A	G	0.9433	-0.351351	NP	NP	0.000378043	6.15326	NP	NP
Phosphatidylcholine diacyl 34:4 (ESI-MS)	T2DM	rs1495130	3	23241009	ZNF385D(dist=1448193), UBE2E2(dist=3775)	C	G	0.9013	0.296736	NP	NP	0.000382697	6.32989	NP	NP
Phosphatidylcholine diacyl 34:4 (ESI-MS)	T2DM	rs163184	11	2847069	KCNQ1	T	G	0.5284	-0.627778	NP	NP	0.000584806	-7.67001	NP	NP
Phosphatidylcholine diacyl 34:4 (ESI-MS)	T2DM	rs2144908	20	42985717	HNF4A	A	G	0.1839	-0.666667	NP	NP	0.000334154	4.6867	NP	NP
[truncated: 1,796 more rows]
